# Supplementary material for: Accurate multiple sequence alignment of transmembrane proteins with PSI-Coffee
Source: Springer Nature journal article supplement (doi:10.1186/1471-2105-13-s4-s1), 2012-03-28
Supplement: 12859_2012_5098_MOESM1_ESM.pdf [file 12859_2012_5098_MOESM1_ESM.pdf]

## The core region of BALiBASE 2

For BALiBASE 2, authors did not publish the XML file allowing automated use of these blocks. The location of the block is only available in HTML file, the uppercase of character (i.e., [http://bips.u-strasbg.fr/en/Products/Databases/BALiBASE2/ref7/test/msl\\_ref7.html](http://bips.u-strasbg.fr/en/Products/Databases/BALiBASE2/ref7/test/msl_ref7.html)). We have generated the XML following the original BALiBASE annotation (<column-score>) and are now providing these files as the following.

.....

7tm\_core-block.xml

.....

```
<?xml version="1.0"?>
```

```
<!DOCTYPE macsim SYSTEM "http://www-bio3d-igbmc.u-strasbg.fr/macsim.dtd">
```

```
<macsim>
```

```
<alignment>
```

```
<aln-name>1</aln-name>
```

```
<sequence seq-type="Protein">
```

```
<seq-name>grhr_claga</seq-name>
```

```
<seq-info><length>1066</length></seq-info>
```

```
<seq-data>-----MSG
```

```
NTTLLSNPTNVLDNSSVLNVSVPVVKWETPTF---TTAARFRVAATLVLFVFRAASNLSVLLSVTRGRGRRLAS-HLRPLIA
```

```
SLASADLVMTFVVMPLDAVWNVTV--QWYAGDA-----MCKLMCFLKLFAMHSAAFILVVVSLDRHHAILHPLDTL---DA
```

```
GRRNRRLMLLTAWILSLLASPQLFIFRAIKAKGVD-----FVQCATHGSF-----
```

```
-----QQH
```

```
WQETAYNMFHFVTLVYFPLLVMISLCYTRILVEINRQMHRSKDKAGEP-----
```

```
-----
```

```
-----CLRRSGTDMIPKARMKT-LKMTIIIVASFVICWTPYLLGIWYWFQ-----PQMLHVIPDYVHHVFFVFG
```

```
NLNTCCDPVIYGFPTPSFRADLSRCFCWRNQNASAKSLPHFSGHRREVSGEAESDLGSG---DQPSGQ-----
```

```
-----</seq-data>
```

```
</sequence>
```

```
<sequence seq-type="Protein">
```

```
<seq-name>v1ar_rat</seq-name>
```

```
<seq-info><length>1066</length></seq-info>
```

```
<seq-data>-----MSFPRGSQD
```

```
RSVGNSSPWVPLTTEGSNGSQEAARLGEG-DSPLGDVRN---EELAKLEIAVLAVIFVAVLGNSSVLLALHRTPRKTS---R
```

```
MHLFIRHLSLADLAVAFFQVLPQLCWDITS--SFRGPDW-----LCRVVKHLQVFAMFASAYMLVVMTADRYIAVCHPLKTL-
```

```
--QQPARRSRLMIATSWVLSFILSTPQYFIFSVIEIEVNGTK-----TQDCWATFIQ-----
```

```
-----
```

```
---PWGTRAYVTWMTSGVFPVAVVVLGTCYGFICYHIWRNIRGKTASSRHSKGDKGSGEAVGPFH-----
```

```
-----
```

```
-----KGLLVTPCVSSVKSISRAKIRT-VKMTFVIVSAYILCWAPFFIVQMWSVWD-----ENFIWTDS
```

```
ENPSITITALLASLNCCNPWIYMFSGHLLQDCVQSFPCCHSMAQKFAKDDSDSMSRRQTSYSNNRSPTNSTGMWKDS
```

```
PKSSKSIRFIPVST-----</seq-data>
```

```
</sequence>
<sequence seq-type="Protein">
<seq-name>oxyr_mouse</seq-name>
<seq-info><length>1066</length></seq-info>
<seq-data>-----ME
GTPAANWSIELDLGSG-VPPGAEGNLTAGPPRRN---EALARVEVAVLCLILFLALSGNACVLLALRTRRHKHS---RLFFFMK
HLSIADLVVAVFQVLPQLLWDITF--RFYGPLD-----LCRLVKYLQVVGMPFASTYLLLLMSLDRCLAICQPLRSL-----RRRTDRL
AVLATWLGCLVASVPQVHIFSLREVADG-----VFDCWAVFIQ-----
-----PWGPKA
YVTWITLAVYIVPVIVLAACYGLISFKIWQNLRLKTAASAAAAAEGSDAAGG-----
-----
-----AGRAALARVSSVKLISKAKIRT-VKMTFIIVLAFIVCWTPFFVQMWSVWD-----VNAPKEASAFIIMLLASL
NSCCNPWIYMLFTGHLFHELQRFLLCCSARYLKGSRPGETSISKKSNSSTFVLSRCSQQSSQRSCSQPSSA-----
-----</seq-data>
```

```
</sequence>
<sequence seq-type="Protein">
<seq-name>5h1b_human</seq-name>
<seq-info><length>1066</length></seq-info>
<seq-data>-----MEEPGAQ
CAPPPPAGSETWVPQANLSSAPSQNCSAKD-YIYQDSIS---LPWKVLLVMLLALITLATTLSNAFVIATVYRTRKLHT---PANY
LIASLAVTDLLVSILVMPISTMYVTG--RWTLGQV-----VCDFWLSSDITCCTASILHLCVIALDRYWAITDAVEYS--AKRTPK
RAAVMIALVWVFSISLPPFF--WRQAKA-----EEEVSECVNTDH-----
-----ILY
TVYSTVGAFYFPTLLLIYALYGRIVVEARSRLKQTPNRTGKRLTRAQLITDSPGSTSSVTSINSRVPDVPSES-----GSPVYVNQ
VKVRVS-----
-----DALLEKKKLMAARERKA-TKTLGILGAFIVCWLPFFIISLVMPIC-----KDAC--WFHLAIFD
FFTWLGYNLSLINPIIYMSNEDFKQAFHKLIRFKCTS-----
-----</seq-data>
```

```
</sequence>
<sequence seq-type="Protein">
<seq-name>5h1b_rabit</seq-name>
<seq-info><length>1066</length></seq-info>
<seq-data>-----MEEPGAQ
CAPPLAAGSQIAPVQANLSAAHSHNCSAEG-YIYQDSIA---LPWKVLLVLLALFTLATTLSNAFVVATVYRTRKLHT---PANY
LIASLAVTDLLVSILVMPISTMYVTG--RWTLGQV-----VCDLWLSSDITCCTASIMHLCVIALDRYWAITDAVEYS--AKRTP
KRAAIMIRLVWVFSICISLPPFF--WRQAKA-----EEEVSECLVNTDH-----
-----VL
YTVYSTVGAFYLPPTLLLIYALYGRIVVEARSRLKQTPNRTGKRLTRAQLITDSPGSTTSSVTSINSRAPDVPSES-----GSPVYVN
QVKVRVS-----
-----DALLEKKKLMAARERKA-TKTLGILGVFIVCWLPFFIISLVMPIC-----KDAC--WFHQAI
DFFTWLGYNLSLINPIIYMSNEDFKQAFHKLIRFKCTS-----
-----</seq-data>
```

```
</sequence>
<sequence seq-type="Protein">
<seq-name>5h1b_mouse</seq-name>
<seq-info><length>1066</length></seq-info>
<seq-data>-----MEEQGIQ
CAPPPPAASQTGVPLTNLS----HNCSADG-YIYQDSIA---LPWKVLLVALLALITLATTLSNAFVIATVYRTRKLHT---PANYLIA
SLAVTDLLVSILVMPISTMYVTG--RWTLGQV-----VCDFWLSSDITCCTASIMHLCVIALDRYWAITDAVEYS--AKRTPKR
AAIMIVLVWVFSISLPPFF--WRQAKA-----EEEMLD CFVNTDH-----
-----VLYT
VYSTVGAFYLPTLLLIALLYGRIYVEARSRIKQTPNKTGKRLTRAQLITDSPGSTSSVTSINSRAPDVPSES-----GSPVYVNQV
KVRVS-----
-----DALLEKKKLMAARERKA-TKTLGILGAFIVCWLPFFIISLVMPIC-----KDAC--WFHMAIFDF
FNWLGYLNSLINPIIYTM SNEDFKQAFHKLIRFKAG-----
-----</seq-data>
```

```
</sequence>
<sequence seq-type="Protein">
<seq-name>5h1b_spaeh</seq-name>
<seq-info><length>1066</length></seq-info>
<seq-data>-----MEEPGAR
CAPPPPAGSQTQTPSSNLS----HNCSADS-YIYQDSIA---LPWKVLLVALLALITLATTLSNAFVIATVYRTRKLHT---PANYLIA
SLAVTDLLVSILVMPISTMYVTG--RWTLGQV-----VCDFWLSSDITCCTASIMHLCVIALDRYWAITDAVEYS--AKRTPRR
AAVMIALVWVFSISLPRFF--WRQAKA-----EEEVLDC LVNTDH-----
-----VLYT
VYSTVGAFYLPTLLLIALLYGRIYVEARSRIKQTPNKTGKRLSRAQLISDSPGSTSSVTSINSRVPDVPSES-----GSPVYVNQV
KVRVS-----
-----DALLEKKKLMAARERKA-TKTLGILGAFIVCWLPFFIISLVMPIC-----KDAC--WFHMAIFDF
FNWLGYLNSLINPIIYTMPNEDFKQAFHKLIRFKCTG-----
-----</seq-data>
```

```
</sequence>
<sequence seq-type="Protein">
<seq-name>5h1b_cavpo</seq-name>
<seq-info><length>1066</length></seq-info>
<seq-data>-----MGNPEAS
CTPPAVLGSQTGLPHANVS-APPNNCSAPS-HIYQDSIA---LPWKVLLVLLALITLATTLSNAFVIATVYRTRKLHT---PANYL
IASLAFTDLLVSILVMPISTMYVTG--RWTLGQA-----LCDFWLSSDITCCTASIMHLCVIALDRYWAITDAVGYS--AKRTPR
RAAGMIALVWVFSICISLPPFF--WRQAKA-----EEEVLDC LVNTDH-----
-----VL
YTVYSTGGAFYLPTLLLIALLYGRIYVEARSRIKQTPNKTGKRLTRAQLITDSPGSTSSVTSINSRAPEVPCDS-----GSPVYVN
QVKVRVS-----
-----DALLEKKKLMAARERKA-TKTLGVILGAFIVCWLPFFIISLVMPIC-----KDAC--WFHMAI
FDFFT WLGYLNSLINPIIYTM SNEDFKQAFHKLIRFKCTT-----
-----</seq-data>
```

```
</sequence>
<sequence seq-type="Protein">
<seq-name>5h1b_didma</seq-name>
<seq-info><length>1066</length></seq-info>
<seq-data>-----MEQPSRL
CSPP-ASGSLTSS-QTNHSTFPNPNC SAPDLEPYQDSIA---LPWKVLLATFLGLITLGTTL SNAFVIATVSRTRKLHT---PANYLI
ASLAVTDLLVSILVMPISTMYTVTG--RWTLGQV-----V CDFWLSSDITCCTASILHLCVIALDRYWAITDAVEYS--AKRTPKR
AAGMIIMVWVFSVSISMPPLF--WRQAKA-----E EVADCSVNTDH-----
-----IL
YTVYSTVGAFYFPTLLLIALLYGRIYVEARSILKQTPNRTGKRLTRAQLITDSPGSSSSGTSINSRAPEGPSES-----GSPVYVN
QVKVKVS-----
-----DALLEKKKLMAARERKA-TRTLG IILGAFIVCWLPFFIISLALPIC-----DDAC--WFHLAIFD
FFNWLGYLNSLINPIIYTKSNDDFKQAFQKLMRFRRTS-----
-----</seq-data>
```

```
</sequence>
<sequence seq-type="Protein">
<seq-name>5h1d_human</seq-name>
<seq-info><length>1066</length></seq-info>
<seq-data>-----MSPL
NQSAEGLPQEASNRS---LNATETS-EAWDPRTL---QALKISLAVVLSVITLATVLSNAFVLTTILLTRKLHT---PANYLIGSLAT
TDLLVSILVMPISIA YTITH--TWNFGQI-----L CDIWLSSDITCCTASILHLCVIALDRYWAITDALEYS--KRRTAGHAATMIAIV
WAISICISIPPLF--WRQAKA-----QEEMSDCLVNTSQ-----
-----ISYTIYSTCGAFY
IPSVLLIILYGRIYRAARNRILNP-PSLYGKRFTTAHLITGSAG--SSLCSLNSSLHEGHSHA-----GSPLFFNHVKIKLA-----
-----
-----DSALERKRISAARERKA-TKILG IILGAFIICWLPFFVSVLVPIC-----RDSC--WIHPALFDFFTWLGYLNSLINPII
YTVFNEEFRQAFQKIVPFRKAS-----
-----</seq-data>
```

```
</sequence>
<sequence seq-type="Protein">
<seq-name>aaf61808</seq-name>
<seq-info><length>1066</length></seq-info>
<seq-data>-----MSP
PNQSVEDLLQGTSNRS---LNATETP-KAWDPGTL---QVLKISLAVVLSIITLATVLSNAFVLTTIFLTRKLHT---PANYLIGSLA
MTDLLVSILVMPISIPYTITQ--TWSFGQL-----L CDIWLSSDITCCTASILHLCVIALDRYWAITDALEYS--KRRTAGHAAAMI
AIVWAISICISIPPLF--WRQARA-----HEEISDCLVNTSQ-----
-----ISYTIYSTCGAF
YIPSLLLIILYGRIYRAARNRILNP-PSLYGKRFTTAHLITGSAG--SSLCSLNPSLHEEHAHSA-----GSPLFFNHVKIKLA-----
-----
-----DSVLERKRISAARERKA-TKTLG IILGAFIICWLPFFVASLVPIC-----RDSC--WIHPALFDFFTWLGYLNSLINP
IITYVFNEEFRQAFQKVVFHFRKAS-----
-----</seq-data>
```

```
</sequence>
<sequence seq-type="Protein">
<seq-name>5h1d_rat</seq-name>
<seq-info><length>1066</length></seq-info>
<seq-data>-----MSLP
NQSLEGLPQEASNRS----LNAT---GAWDPEVL---QALRISLVVLSIITLATVLSNAFVLTILLTKKLHT---PANYLIGSLATTD
LLVSILVMPISIAYTTR--TWNFGQI-----LCDIWVSSDITCCTASILHLCVIALDRYWAITDALEYS--KRRTAGHAAAMIAAV
WAISICISIPPLF--WRQATA-----HEEMSDCLVNTSQ-----
-----ISYTIYSTCGAFYI
PSILLIILYGRIYVAARSILNP-PSLYGKRFTTAQLITGSAG--SSLCSLNPSLHESHTHTV-----GSPLFFNQVKIKLA-----
-----
-----DSILERKRISAARERKA-TKTLGILGAFIICWLPFFVSVLVPIC-----RDSC--WIHPALFDFFTWLGYLNSLINPVYI
TVFNEDFRQAFQRVVHFRKAS-----
-----</seq-data>
```

```
</sequence>
<sequence seq-type="Protein">
<seq-name>5h1d_cavpo</seq-name>
<seq-info><length>1066</length></seq-info>
<seq-data>-----MSP
PNQSEGLPQEASNRS----LNATETP-GDWDPGLL---QALKVSLVVLSIITLATVLSNAFVLTILLTRKLHT---PANYLIGSLA
TTDLLVSILVMPISIAYTTR--TWNFGQI-----LCDIWVSSDITCCTASILHLCVIALDRYWAITDALEYS--KRRTAGHAGAMI
AAVWVISICISIPPLF--WRQAQA-----QEEMSDCLVNTSQ-----
-----ISYTIYSTC
GAFYIPSVLLIILYSRIYRAARSILNP-PSLSGKRFTTAHLITGSAG--SSLCSLNPSLHEGHMHP-----GSPLFFNHVRIKLA-----
-----
-----DSVLERKRISAARERKA-TKTLGILGAFIVCWLPFFVSVLVPIC-----RDSC--WIHPALFDFFTWLGYLNS
LINPIIYTVFNEDFRQAFQKVVHFRKAS-----
-----</seq-data>
```

```
</sequence>
<sequence seq-type="Protein">
<seq-name>5h1d_rabit</seq-name>
<seq-info><length>1066</length></seq-info>
<seq-data>-----MSPS
NQSAEGLPQEASNRS----LNATGTP-EAWDPGTL---QALKISLAVVLSIITVATVLSNTFVLTILLTRKLHT---PANYLIGSLAT
TDLLVSILVMPISIAYTITH--TWNFGQV-----LCDIWVSSDITCCTASILHLCVIALDRYWAITDALEYS--KRRTAGHAAAMIA
VWVAISICISIPPLF--WRQAKA-----HEEVSDCLVNTSQ-----
-----ISYTIYSTCGAF
YIPSVLLIVLYGRIYMAARNRILNP-PSLYGKRFTTAHLITGSAG--SSLCSLSPSLGEGHSHA-----GSPLFFNPVRIKLA-----
-----
-----DSVLERKRISAARERKA-TKTLGILGAFIGCWLPFFVASLVPIC-----RDSC--WMPPGLFDFFTWLGYLNS
LINPIIYTVFNEDFRQAFQRVHFRKAF-----
-----</seq-data>
```

```
</sequence>
<sequence seq-type="Protein">
<seq-name>5h1d_canfa</seq-name>
<seq-info><length>1066</length></seq-info>
<seq-data>-----MSP
PNQSLEGLLQEASNRS----LNATETP-EAWGPETL---QALKISLALLLSIITMATALSNAFVLTTFILTRKLHT---PANYLIGSLA
MTDLLVSILVMPISIAAYTTTR--TWSFGQI-----LCDIWLSSDITCCTASILHLCVIALDRYWAITDALEYS--KRRTAGRAAVMIA
TVWVISICISIPPLF--WRQAKA-----QEDMSDCQVNTSQ-----
-----ISYTIYSTCG
AFYIPSVLLIILYGRIYVAARNRILNP-PSLYGKRFTTAQLITGSAG--SSLCSLSPSLQEERSHAA-----GPPLFFNHVQVKLA---
-----
-----EGVLERKRISAARERKA-TKTLGIILGAFIVCWLPFFVASLVLPIC-----RASC--WLHPALFDFFTWLGYLN
SLINPIIYTVFNEEFRQAFQRVVHVRKAS-----
-----</seq-data>
```

```
</sequence>
<sequence seq-type="Protein">
<seq-name>5h1d_fugru</seq-name>
<seq-info><length>1066</length></seq-info>
<seq-data>-----MEL
DNNSLDYFSSNFTDIP----SNTTV---AHWTEATL---LGLQISVSVVLAIVTLATMLSNAFVIATIFLTRKLHT---PANFLIGSLAV
TDMLVSILVMPISIVYTVSK--TWSLGQI-----VCDIWLSSDITFCTASILHLCVIALDRYWAITDALEYS--KRRTMRRRAAVMV
AVVWVISISIMPPLF--WRQAKA-----HEELKECMVNTDQ-----
-----ISYTYLSTF
GAFYVPTVLLIILYGRIYVAARSRIKFT-PSYSGKRFTTAQLIQTSAG--SSLCSLNSASNQEAHLHSGAGGEGGGSPFLVNSVK
VKLA-----
-----DNVLERKRLCAARERKA-TKTLGIILGAFIICWLPFFVVTLVWAIC-----KEC--SFDPLLFDVFT
WLGYLNSLINPVIYTVFNDEFKQAFQKLIKFR-----
-----</seq-data>
```

```
</sequence>
<sequence seq-type="Protein">
<seq-name>5h1e_human</seq-name>
<seq-info><length>1066</length></seq-info>
<seq-data>-----
-----MNITNCTTEA-SMAIRPKT---ITEKMLICMTLVVITLTTLLNLAVIMAIGTTKKLHQ--PANYLICSLAVTDLLVAV
LVMPLSIYIVMD--RWKLGYP-----LCEVWLSVDMTCCTCSILHLCVIALDRYWAITNAIEYA--RKRTAKRAALMILTVWTISI
FISMPPLF--WRSHRR-----LSPPPSQCTIQHDH-----
-----VIYTIYSTLGAFYIPLTI
LILYYRIYHAAKSLYQKRGSSRHLSNRSTDSQNSFAS---CKLTQTFCVSDFSTSDP-----TTEFEKPHASIRIPFDNDL-----
-----
-----DHPGERQQISSTRERKA-ARILGLILGAFILSWLPFFIKELIVGLS-----IY--TVSSEVADFLTWLGYNLSLINPLLYTS
FNEDFKLAFKKLIRCREHT-----
-----</seq-data>
```

```
</sequence>
<sequence seq-type="Protein">
<seq-name>5h1f_human</seq-name>
<seq-info><length>1066</length></seq-info>
<seq-data>-----
-----MDFLNSSDQNLTSSEELLNR---MPSKILVSLTSLGLALMTTITNSLVIAAIIIVTRKLHH---PANYLICSLAVTDFLVAV
LVMPFSIVYIVRE--SWIMGQV-----VCDIWLSVDITCCTCSILHLSAIALDRYRAITDAVEYA--RKRTPKHAGIMITIVWIISVF
ISMPPPLF--WRHQG-----TSRDDECIKHDH-----
-----IVSTIYSTFGAFYIPLALILIL
YKIIYRAAKTLYHKRQASRIAKEEVNGQVLESSEKSTKSVSTSYVLEKSLSDP-----STDFDKIHSTVRSRSEFKH-----
-----
-----EKSRRQKISGTRERKA-ATTLGLILGAFVICWLPFFVKELVVNVC-----DKC--KISEEMSNFLAWLGYLNSLINPLIY
TIFNEDFKKAFQKLVRCRC-----
-----</seq-data>
```

```
</sequence>
<sequence seq-type="Protein">
<seq-name>5h1f_cavpo</seq-name>
<seq-info><length>1066</length></seq-info>
<seq-data>-----
-----MDFLNSSDQNLTSSEELLHR---MPSKILVSLTSLGLALMTTITNSLVIAAIIIVTRKLHH---PANYLICSLAVTDFLVAV
LVMPFSIVYIVRE--SWIMGQV-----LCDIWLSVDIICCTCSILHLSAIALDRYRAITDAVEYA--RKRTPKQAGIMITIVWIISVFI
SMPPPLF--WRHQG-----TSRDDECIKHDH-----
-----IVSTIYSTFGAFYIPLVLILIL
YKIIYKAAKTLYHKRQASRIAKEELNGQVLESSEKSIKVMSTTYVPEKSLSDP-----STDFDKIHNTVKSPRCKLRH-----
-----
-----EKSRRQKISGTRERKA-ATTLGLILGAFVICWLPFFVKELVVNVC-----EKC--KISEEMANFLAWLGYLNSLINPLI
YTIFNEDFKKAFQKLVRCQY-----
-----</seq-data>
```

```
</sequence>
<sequence seq-type="Protein">
<seq-name>5h1f_mouse</seq-name>
<seq-info><length>1066</length></seq-info>
<seq-data>-----
-----MDFLNASDQNLTSSEELLNR---MPSKILVSLTSLGLALMTTITNSLVIAAIIIVTRKLHH---PANYLICSLAVTDFLVAV
LVMPFSIVYIVRE--SWIMGQV-----LCDIWLSVDIICCTCSILHLSAIALDRYRAITDAVEYA--RKRTPRHAGIMITIVWVISVFI
SMPPPLF--WRHQG-----TSRDDECVIKHDH-----
-----IVSTIYSTFGAFYIPLVLILIL
YKIIYRAARTLYHKRQASRMIIKEELNGQVFLESSEKSIKLVSTSYMLEKSLSDP-----STDFDRIHSTVKSPRSELKH-----
-----
-----EKSRRQKISGTRERKA-ATTLGLILGAFVICWLPFFVKELVVNVC-----EKC--KISEEMSNFLAWLGYLNSLINPLI
YTIFNEDFKKAFQKLVRCRY-----
-----</seq-data>
```

</sequence>  
<sequence seq-type="Protein">  
<seq-name>5h1a\_fugru</seq-name>  
<seq-info><length>1066</length></seq-info>  
<seq-data>-----MDLR  
ATSSNDSNATSGYSDTAAVDWDEGENATGSGSLPDPE---LSYQIITSLFLGALILCSIFGNSCVVAIAALERSLQN---VANYLI  
GSLAVTDLMVSVLVLPMAALYQVLN--KWTLGQD-----ICDLFIALDVLCTSSILHLCAIALDRYWAITDPIDYV--NKRTPRR  
AAVLISVTWLGFSISIPPML-GWRS-----AEDRANPDACIISQDP-----  
-----GYTI  
YSTFGAFYIPLILMLVLYGRIFKAARFRIRKTVKKTEKAKASDMCLTSPAVFHKRANGDAVSAEWKRGYKFKPS-SPCANGA  
VRHGEEMESLEIIEVN--SNSKTHLPNTP-QSSSHE-----  
-----NINEKTTGTRRKIALARERKT-VKTLGIIMGTFIFCWLPFFIVALVLPFC-----  
-AENC--YMPEWLGAVINWLGYSNSLLNPIIYAYFNKDFQSAFKKILRCKFHRH-----  
-----</seq-data>

</sequence>  
<sequence seq-type="Protein">  
<seq-name>5h1b\_fugru</seq-name>  
<seq-info><length>1066</length></seq-info>  
<seq-data>-----  
---MEGTNNTGWTHFDSTSNRTSKSFDEEVK---LSYQVVTSLGALILCSIFGNACVVAIAALERSLQN---VANYLIGSLAVT  
DLMVSVLVLPMAALYQVLN--RWTLGQI-----PCDIFISLDMLCCTSSILHLCVIALDRYWAITEPIDYM--KKRTPRRAVLIS  
VTWLVGFSISIPPML-IMRSQPSSM-----AEDRANSKQCKITQDP-----  
-----WYTIYS  
TFGAFYIPLTLMLVLYGRIFKAARFRIRRTVRKTEKKKVS DTCALSPAMFHRKTPGDAHGKSWKRSVEPRP--LPNVNGAVK  
HAGEGESLDIIEVQ--SNSRCNLPLNTPGTVPLE-----  
-----NRHEKATETKRKIALARERKT-VKTLGIIMGTFILCWLPFFIVALVMPFC-----  
QESC--FMPHWLKDVINWLGYSNSLLNPIIYAYFNKDFQSAFKKIIKCHFCRA-----  
-----</seq-data>

</sequence>  
<sequence seq-type="Protein">  
<seq-name>5h1a\_rat</seq-name>  
<seq-info><length>1066</length></seq-info>  
<seq-data>-----  
MDVFSFGQGNNNTTASQEPFGTGGNVTSISDVT----FSYQVITSLLLGTLIFCAVLGNACVVAIAALERSLQN---VANYLIGSLA  
VTDLMVSVLVLPMAALYQVLN--KWTLGQV-----TCDLFIALDVLCTSSILHLCAIALDRYWAITDPIDYV--NKRTPRRAAA  
LISLTWLGFLISIPPML-GWRT-----PEDRSDPDACTISKDH-----  
-----GYTIYSTF  
GAFYIPLLLMLVLYGRIFRAARFRIRKTVRKVEKKGAGTSLGTSSAPPPKSLNGQP GSGDWRRCAENRAVGTPCTNGAVR  
QGDDEATLEVIEVHRVGN SKEHLPLPSESGSNSYAPACLE-----  
-----RKNERNAEAKRKMALARERKT-VKTLGIIMGTFILCWLPFFIVALVLPFC  
-----ESSC--HMPALLGAIINWLGYSNSLLNPVIYAYFNKDFQNAFKKIIKCKFCRR-----  
-----</seq-data>



```
</sequence>
<sequence seq-type="Protein">
<seq-name>5h1a_mouse</seq-name>
<seq-info><length>1066</length></seq-info>
<seq-data>-----
MDMFSLGQGNNTTTSLEPFGTGGNDTGLSNVT----FSYQVITSLLLGLIFCAVLGNACVVAIALERSLQN---VANYLIGSL
AVTDLMVSVLVLPMALYQVLN--KWTLGQV-----TCDLFIALDVLCTSSILHLCAIALDRYWAITDPIDYV--NKRTPRRAA
ALISLTLWIGFLISIPPML-GWRA-----PEDRSNPNECTISKDH-----
-----GYTIYST
FGAFYIPLLLMLVLYGRIFRAARFRIRKTVKKVEKKGAGTSFGTSSAPPPKKS LNGQPGSGDCRRAENRAVGTPCANGAVR
QGEDDATLEVIEVHRVGNSKGDLPSESGATSYVPACLE-----
-----RKNERTAEAKRKMALARERKT-VKTLGIIMGTFILCWLPFFIVALVLPFC
-----ESSC--HMPELLGAIINWLGYSNSLLNPVIYAYFNKDFQNAFKKIIKCKFCR-----
-----</seq-data>
```

```
</sequence>
<sequence seq-type="Protein">
<seq-name>5h1a_human</seq-name>
<seq-info><length>1066</length></seq-info>
<seq-data>-----
MDVLSPGQGNNTTSPAPFETGGNTTGISDVT---VSYQVITSLLLGLIFCAVLGNACVVAIALERSLQN---VANYLIGSLA
VTDLMVSVLVLPMALYQVLN--KWTLGQV-----TCDLFIALDVLCTSSILHLCAIALDRYWAITDPIDYV--NKRTPRRAAA
LISLTLWIGFLISIPPML-GWRT-----PEDRSDPDACTISKDH-----
-----GYTIYSTF
GAFYIPLLLMLVLYGRIFRAARFRIRKTVKKVEKTGADTRHGASPAPQPKKSVNGESGRNWRLGVESKAGGALCANGAVR
QGDDGAALEVIEVHRVGNSKEHLPLPSEAGPTPCAPASFE-----
-----RKNERNAEAKRKMALARERKT-VKTLGIIMGTFILCWLPFFIVALVLPF
C-----ESSC--HMPTLLGAIINWLGYSNSLLNPVIYAYFNKDFQNAFKKIIKCKFCRQ-----
-----</seq-data>
```

```
</sequence>
<sequence seq-type="Protein">
<seq-name>q98998</seq-name>
<seq-info><length>1066</length></seq-info>
<seq-data>-----
----MDASNNTTSWNILQRGRMG-PSWRRCP----VSYQIIASLFLGRSFSAGIFGNACVIAIALERSLQN---VANYLIGSLAVT
DLMVSVLVLPMALYQVLN--KWTLGQV-----TCDIFISLDVLCTSSILHLCAIALDRYWAITDPIDYV--NKRTPRRAAVLIS
ITWIVGFSISIPPML-GWRT-----PEDRSDPNACRISEDP-----
-----GYTIYSTFGA
FYIPLILMLVLYGKIFKAARFRIRKTVKKAEEKKVADTCLSVSQSPKEKQRGAQQELEEVGGAQAQR---CVNGAIRHGEEG
AVLEIIEVHHYVNSKCHLHCKPVPPEQLPPA-----
-----LKNDRATEAKRKVALARERKT-VKTLGIIMGTFILCWLPFFIVALVLPFC-----ETC
--HMPHLLFDIITWLGYSNSLLNPIIYAYFNKDFQSAFKKIIKCKFCRQ-----
-----</seq-data>
```

```
</sequence>
<sequence seq-type="Protein">
<seq-name>5h7_human</seq-name>
<seq-info><length>1066</length></seq-info>
<seq-data>-----MMDVNSSGRPDLYGHLRSFLLPEVGR
GLPDLSPDGGADPVAGSWAPHLLS----EVTASPAPTWDAPPDNASGCGEQINYG--RVEKVVIGSILTITLLTIAGNCLVVIS
VCFVKKLRQ---PSNYLIVSLALADLSVAVAVMPFVSVDLIG-GKWIFGHF-----FCNVFIAMDVMCCTASIMTLCVISIDRYL
GITRPLTYP--VRQNGKCMAMKILSVWLLSASITLPLPF-GWAQN-----VNDDKV
CLISQD-----
-----FGYTIYSTAVAFYIPMSVMLFMYYQIYKAARKSAAKHKFPGFPRVPEPDSVIALNGIVKLQKEVEECANL
SRLKHE-----
-----RKNISIFKREQKA-ATTLGIIVGAFTVCWLPPFLLSTARPFI-----CGTS
C-SCIPLWVERTFLWLGYANSLINPFYAFFNRDLRTTYRSLQCQYRNINRKLKSAAGMHEALKLAERPERPEFVLQNADYCR
KKGHDS-----</seq-data>
</sequence>
```

```
<sequence seq-type="Protein">
<seq-name>5h7_rat</seq-name>
<seq-info><length>1066</length></seq-info>
<seq-data>-----MMDVNSSGRPDLYGHLRSILPEVGRG
LQDLSPDGGAHPVSSWMPHLLSGFL-EVTASPAPTWDAPPDNVSGCGEQINYG--RVEKVVIGSILTITLLTIAGNCLVVIS
VCFVKKLRQ---PSNYLIVSLALADLSVAVAVMPFVSVDLIG-GKWIFGHF-----FCNVFIAMDVMCCTASIMTLCVISIDRYL
GITRPLTYP--VRQNGKCMAMKILSVWLLSASITLPLPF-GWAQN-----VNDDKV
CLISQD-----
-----FGYTIYSTAVAFYIPMSVMLFMYYQIYKAARKSAAKHKFPGFPRVQPESVISLNGVVKLQKEVEECAN
LSRLKHE-----
-----RKNISIFKREQKA-ATTLGIIVGAFTVCWLPPFLLSTARPFI-----CG
TSC-SCIPLWVERTCLWLGYANSLINPFYAFFNRDLRTTYRSLQCQYRNINRKLKSAAGMHEALKLAERPERSEFVLQNSDH
CGKKGHDT-----</seq-data>
```

```
>
</sequence>
<sequence seq-type="Protein">
<seq-name>5h7_cavpo</seq-name>
<seq-info><length>1066</length></seq-info>
<seq-data>-----MMGVNSSGRPDLYGHLHSILLP--GRG
LPDWSPDGGADPGVSTWTPRLLSGVP-EVAASPSPSWDGTWDNVSGCGEQINYG--RAEKVVIGSILTITLLTIAGNCLVV
ISVCFVKKLRQ---PSNYLIVSLALADLSVAVAVIPFVSVDLIG-GKWIFGHF-----FCNVFIAMDVMCCTASIMTLCVISIDRYL
GITRPLTYP--VRQNGKCMKPKMILSVWLLSASITLPLPF-GWAQN-----VNDDKV
CLISQD-----
-----FGYTIYSTAVAFYIPMSVMLFMYYRIYKAARKSAAKHKFPGFPRVQPESIISLNGMVKLQKEVEECANL
SRLKHE-----
-----RKNISIFKREQKA-ATTLGIIVGAFTVCWLPPFLLSTARPFI-----CGT
AC-SCIPLWVERTCLWLGYANSLINPFYAFFNRDLRTTYRSLQCQYRNINRKLKSAAGMHEALKLAERPERPECVLQNSDYC
```

RKKGHDS-----</seq-data>

</sequence>

<sequence seq-type="Protein">

<seq-name>5ht1\_drome</seq-name>

<seq-info><length>1066</length></seq-info>

<seq-data>MALSGQDWRRHQSHRQHRNHRTQGNHQKLISTATLTLFVFLSSWIAYAAGK-ATVPAPLVEGETESATSQ  
DFNSSSAFLGAIASASSTGSGSGSGSGSGSGSGSYGLASMNSSPIAIVSYQGITSSNLGDSNTTLVPLSDTPLLLEFAAGE  
FVLP---PLTSIFVSIVLLIVILGTVVGNVLVCIAVCMVRKLR---PCNYLLVSLALSDLCVALLVMPMALLYEVLE--KWNFGPL--  
---LCDIWVSFDVLCCTASILNLCAISVDRYLAITKPLEYG--VKRTPRRMMLCVGIVWLAAACISLPPLL-ILGNEHE-----  
-----DEEGQPICTVCQNF-----

-----AYQIYATLGSFYIPLSVMLFVYYQIFRAARRIVLEEKRA  
QTHLQQALNGTGSPSAPQAPPLGHTELASSGNGQRHSSVGNTSLTYSTCGGLSSGGGALAGHGSGGGVSGSTGL-----  
-----L

GSPHHKLRFLAKEKKA-STTLGIIMSFTVCWLPFFILALIRPFE-----T-MHVPASLSSLFLWLGYANSLLNPIIYATLNR  
DFRKPFEIILYFRCSLNTMMRENYQDQYGEPPSQRVMLGDERHGARESFL-----

-----</seq-data>

</sequence>

<sequence seq-type="Protein">

<seq-name>o15970</seq-name>

<seq-info><length>1066</length></seq-info>

<seq-data>-----  
MSTINSTNCTFYFQLASKNNSAVQ-VPFYCIKFS--FEFEVFLIIVLTIFLVGTAGGNLLVISSVAIVKKLQT---SSNFLIVNLACSD  
FLVSILVLPGAVHQVIYR-GQWPFSEI-----LCDIFISFDVILCTSSILNLCAISIDRYLVITRPLQYA--VNRTPARIGTMVAISWV  
TSALISIPPMF-GLKETFI-----PGQCNYSDNL-----

-----IYQIYATFGAFYIPLIV  
MLILYGRIFKLAREMAQNDACLKIGISPNSDKEQHSRLRIVDSHCNTPNGQMNLISYSGSLCSISKSNNLSDSSP-----  
-----

-----NKVNLNRVCLKSSTETKA-ITTLGVIMGCFTICWLPFFLIQISKPVL---KVANVDSM-NYFPIWLIELCLWLGYF  
NSFLNPIIYAKFNREFRTPFKQILLCKCNSINARLRSETFVQEYGLPNSSAPTGRGSDQTSLNNGSFTKNRRRRTPGVLRQNP  
HLNNCKIENSRIYECSLINKTNKFPPESSVLLNSIANGNTKPVKDDTDDNPFHFSDQISPNCSINDQRSEKMFMLVQHLNL

-----</seq-data>

</sequence>

<sequence seq-type="Protein">

<seq-name>o15969</seq-name>

<seq-info><length>1066</length></seq-info>

<seq-data>-----MWKLPVFVIIIS  
NSFSIVVMQDLILNCTNYSIYVTVNNLSRLAIPFECEKYP--VGMEVFLGIIFIIIVGAIGGNFLVILAILVKKLQT---ASNWLIL  
SLAFSDFVSVLVMPIAAFNQLSR-FRWPFSEK-----LCDFYNCCDVMLCTSSILNLCAISIDRYLVITRPMQYV--VRRTPALIG  
GMIGVAWLMSGLISIPPVL-GWKEKFT-----PGICQLTDNL-----

-----LYQIYA  
TFCAFYIPLIVMLVLYYQIFKLARNMAQEDAKRKLGTG-QMTDEEQTSIPIQLGRNTSGDEDRKLLRLEDAQRLSKGNQGN  
GFDPEAQ-----

-----TGPKNNAK K K K K Q V N N E S K A - I T T L G V I M G C F T L C W L P F F I I Q I L K P I L --- I V S K V D H E - K Y L  
M P W C Y E L F L W L G Y F N S F L N P V I Y A K F N R E F R N P F K Q I L F F H C F N I N A R I R V D T F A E Q Y G L P M Q K T M A T S L Y E T S H L N T H N T  
A N S R R R S S V P F T P V S R K N K S S S Q S R P T S D Q S T N K A -----

</seq-data>

</sequence>

<sequence seq-type="Protein">

<seq-name>a2aa\_human</seq-name>

<seq-info><length>1066</length></seq-info>

<seq-data>-----

-M G S L Q P D A G N A S W N G T E A P G G - G A R A T P Y S ---- L Q V T L T L V C L A G L L M L L T V F G N V L V I I A V F T S R A L K A --- P Q N L F L V S L A  
S A D I L V A T L V I P F S L A N E V M G -- Y W Y F G K A ----- W C E I Y L A L D V L F C T S S I V H L C A I S L D R Y W S I T Q A I E Y N -- L K R T P R R I K A I I T  
V W V I S A V I S F P P L I - S I E K K G G G G ----- G P Q P A E P R C E I N D Q K -----

-----W Y V I S S C I G S

F F A P C L I M I L V Y V R I Y Q I A K R R T R V P P S R R - G P D A - V A A P P G G T E R R P N G L G P E R S - A G P G G A E A E P L T Q L N G A P G E P A P A G  
P R D T D A L D L E E S S S D H A E R P P G P R R P E R G P R G K G K A R A S Q V K P G D S L P R R G P G A T G I G T P A A G P G E E R -----

-----V G A A K A S R W R G R Q N R E K R F - T F V L A V V I G V F V V C

W F P F F F T Y T L T A V G ----- C -- S V P R T L F K F F F W F G Y C N S S L N P V I Y T I F N H D F R R A F K I L C R G D R K R I V -----

-----</seq-data

>

</sequence>

<sequence seq-type="Protein">

<seq-name>a2aa\_mouse</seq-name>

<seq-info><length>1066</length></seq-info>

<seq-data>-----

-M G S L Q P D A G N S S W N G T E A P G G - G T R A T P Y S ---- L Q V T L T L V C L A G L L M L F T V F G N V L V I I A V F T S R A L K A --- P Q N L F L V S L A  
S A D I L V A T L V I P F S L A N E V M G -- Y W Y F G K V ----- W C E I Y L A L D V L F C T S S I V H L C A I S L D R Y W S I T Q A I E Y N -- L K R T P R R I K A I I V T  
V W V I S A V I S F P P L I - S I E K K G A G G ----- G Q Q P A E P S C K I N D Q K -----

-----W Y V I S S I G

S F F A P C L I M I L V Y V R I Y Q I A K R R T R V P P S R R - G P D A - C S A P P G G A D R R P N G L G P E R G - A G P T G A E A E P L T Q L N G A P G E P A P A  
G P R D G D A L D L E E S S S E H A E R P P G P R R P D R G P R A K G K T R A S Q V K P G D S L P R R G P G A A G P G A S G S G H G E E R -----

-----G G G A K A S R W R G R Q N R E K R F - T F V L A V V I G V F V V

C W F P F F T Y T L I A V G ----- C -- P V P S Q L F N F F F W F G Y C N S S L N P V I Y T I F N H D F R R A F K I L C R G D R K R I V -----

-----</seq-dat

a>

</sequence>

<sequence seq-type="Protein">

<seq-name>a2aa\_cavpo</seq-name>

<seq-info><length>1066</length></seq-info>

<seq-data>-----

-M G S L Q P D S G N A S W N G T E G P G G - G T R A T P Y S ---- L Q V T V T L V C L V G L L I L L T V F G N V L V I I A V F T S R A L K A --- P Q N L F L V S L A S  
A D I L V A T L V I P F S L A N E V M G -- Y W Y F G K A ----- W C E I Y L A L D V L F C T S S I V H L C A I S L D R Y W S I T Q A I E Y N -- L K R T P R R I K A I I V T V  
W W I S A V I S F P P L I - S F E K A G - G G ----- G Q Q P A E P R C E I N D Q K -----

-----WYVISSSIGS  
FFAPCLIMILVYVRIYQIAKRRTRVPPSRR-GPDAHAAAPPGGAERRPNGLGLERG-VGPGGAEAEPLPTQVNGAPGEPAPA  
GPRDAEALDLEESSSEHAERPPGARRPERGLRAKSKARASQVKPGDSLPRRAPGAAGSGTSGSGPGEER-----  
-----GGGAKASRWRGRQNREKRF-TFVLAVVIGVFVVC  
WFPFFFTYTLTAVG-----C--SVPRTLKFFFWFGYCNSSLNPVIYTIFNHDFRRAFKKILCRGDRKRIV-----  
-----</seq-data

>  
</sequence>

<sequence seq-type="Protein">  
<seq-name>q28838</seq-name>  
<seq-info><length>1066</length></seq-info>  
<seq-data>-----

-MGS LQPDAGNASWNGTEAPGG-GARATPYS----LQVTLTLVCLAGLLMLFTVFGNVLVIIAVFTSRALKA---PQNLFLVSLA  
SADILVATLVIPFSLANEVMG--YWYFGKA-----WCEIYLALDVLFACTSSIVHLCAISLDRYWSITQAI EYN--LKRTPRRIKAIIVT  
VWVISAVISFPPLI-SFEKKRGRS-----GQPSAEPRCEINDQK-----

-----WYVISSSIGS  
FFAPCLIMILVYVRIYQIAKRRTRVPPSRR-GPDATAAELPGSAERRPNGLGPERGGVGPVGAEVESLQVQLNGAPGEPAPA  
GAG-ADALDLEESSSEHAERPPGSRRSERGPRAK GKARASQVKPGDSLPRRGPGATGLGAPTAGPAEERS-----  
-----GGGAKASRWRGRQNREKRF-TFVLAVVIGVFVVC  
CWFPFFFTYTLTAIG-----C--PVPPTLKFFFWFGYCNSSLNPVIYTIFNHDFRRAFKKILCRGDRKRIV-----  
-----</seq-dat

a>  
</sequence>

<sequence seq-type="Protein">  
<seq-name>a2ac\_mouse</seq-name>  
<seq-info><length>1066</length></seq-info>  
<seq-data>-----MASPALAAA

LAAAAAEGPNGSDAGEWGS GGGANASGTDW-VPPPGQYS----AGAVAGLAAVVGFLIVFTVVG NVLVVI AVLTSRALRA-  
--PQNLFLVSLASADILVATLVMPFSLANELMA--YWYFGQV-----WCGVYLALDVLFACTSSIVHLCAISLDRYWSVTQAVEY  
N--LKRTPRRVKATIVAVWLISAVISFPPLV-SFYRRPDGA-----AYPQCGLNDET----

-----WYILSSCIGSFFAPCLIMGLVYARIYRVAKLRTLSEKR-GPAG----PDGASPTTENGLG-----KAAGENGHCAPPRT  
EVEPDESSAAERRRRR-GALRRGRRREGAEGDTGSADGPGP-----  
-----GLAAEQGARTASRSPGPGGRLSRASSRSVEFFLSRRRRRARSSVCRRKVAQAREKRF-TFVLA  
VVMGVFVLCWFPFFFSYSLYGIC-----REAC--QLPEPLKFFFWIGYCNSSLNPVIYTVFNQDFRRSFKHILFRRRRRGRFRQ--  
-----</seq-data>

</sequence>  
<sequence seq-type="Protein">  
<seq-name>a2ac\_cavpo</seq-name>  
<seq-info><length>1066</length></seq-info>  
<seq-data>-----MASPALAAA

LLA--AEGPNASGAGEG--GGGVNASGAVW-GPPPSQYS---AGAVAGLAAVVGFLIVFTVVGNNLVVIAVLTSRALRA---P  
QNLFLVSLASADILVATLVMFPFLANELMA--YWYFGQV-----WCGVYLALDVLFACTSSIVHLCAISLDYWSVTQAVEYN--  
LKRTPRRVKATIVAVWLISAIISFPPLV-SFYRQPDGA-----AYPRCGLNDET-----  
-----WYLSSCIGSFFAPCLIMGLVYARIYRVAKLRTRLSEKR-GPAG---PEGESPTTENGLGAAAA-AAAGENGHCAPPRAD  
VEPDESSAAERRRRR-GALRRGARQREAGVEAPGPGLG-----  
-----SAAADPGALSVSRSPPGGRLSRASSRSVEFFLSRRRRRARSSVCRRKVAQAREKRF-TFVLAVVM  
GVFVLCWFPFFFSYSLYGIC-----REAC--QLPTPLFKFFFWIGYCNSLNPVIYTFNQDFRRSFKHILFRRRRRGFRQ-----  
-----<

/seq-data>

</sequence>

<sequence seq-type="Protein">

<seq-name>a2ac\_human</seq-name>

<seq-info><length>1066</length></seq-info>

<seq-data>-----MASPALAAA  
LAVAAAAGPNASGAGERGSGGVANASGASW-GPPRGQYS---AGAVAGLAAVVGFLIVFTVVGNNLVVIAVLTSRALRA--  
-PQNLFLVSLASADILVATLVMFPFLANELMA--YWYFGQV-----WCGVYLALDVLFACTSSIVHLCAISLDYWSVTQAVEYN  
--LKRTPRRVKATIVAVWLISAVISFPPLV-SLYRQPDGA-----AYPQCGLNDET-----

-----WYLSSCIGSFFAPCLIMGLVYARIYRVAKRRTRLSEKR-APVG---PDGASPTTENGLGAAAGEARTG---TARPRPP  
TWSRTRAAQRPRGGAP-GPLRRGRRRAGAEGGAGGADGQGAG-----  
-----PGAAQSGALTASRSPGGRLSRASSRSVEFFLSRRRRRARSSVCRRKVAQAREKRF-TF  
VLAVVMGVFVLCWFPFFFIYSLYGIC-----REAC--QVPGPLFKFFFWIGYCNSLNPVIYTVFNQDFRPSFKHILFRRRRRGF  
RQ-----

-----</seq-data>

</sequence>

<sequence seq-type="Protein">

<seq-name>a2ad\_human</seq-name>

<seq-info><length>1066</length></seq-info>

<seq-data>-----MASPALAAA  
LAVAAAAGPNASGAGERGSGGVANASGASW-GPPRGQYS---AGAVAGLAAVVGFLIVFTVVGNNLVVIAVLTSRALRA--  
-PQNLFLVSLASADILVATLVMFPFLANELMA--YWYFGQV-----WCGVYLALDVLFACTSSIVHLCAISLDYWSVTQAVEYN  
--LKRTPRRVKATIVAVWLISAVISFPPLV-SLYRQPDGA-----AYPQCGLNDET-----

-----WYLSSCIGSFFAPCLIMGLVYARIYRVAKLRTRLSEKR-APVG---PDGASPTTENGLGAAAGAGENG---HCAPPPA  
DVEPDESSAAAERRRRRGALRRGRRRAGAEGGAGGADGQ-----  
-----GAAESGALTASRSPGGRLSRASSRSVEFFLSRRRRRARSSVCRRKVAQAREKRF-TFVLA  
VVMGVFVLCWFPFFFSYSLYGIC-----REAC--QVPGPLFKFFFWIGYCNSLNPVIYTVFNQDFRRSFKHILFRRRRRGFRQ--  
-----

-----</seq-data>

</sequence>

<sequence seq-type="Protein">

```
<seq-name>a2ac_didma</seq-name>
<seq-info><length>1066</length></seq-info>
<seq-data>-----MDL
QLTTNSTDSGDR--GGSSNESLQRQ--PPSQYS---PAEVAGLAAVVSFLIVFTIVGNVLVVIPVLTSRALKA---PQNLFLVSLA
SADILVATLVMPFSLANELMN--YWYFGKV-----WCDIYLALDVLFACTSSIVHLCAISLDRYWSVTQAVGYN--LKRTPRRIKGI
IVTVWLISAVISFPPLI-SLYRDPEDD-----LYPQCELNDET-----
-----WYLSSCIGS
FFAPCIIMVLVYVRIYRVAKLRTRLSEKRTVPEGSSQTENGLSRPPVGAGPSTAAAAAASRLRLQAGENGHYHLHHHHHHHL
HHHHHHHHHQLRKSAELEDIELESSTENRRRRRSREEAARPKGRPR-----
-----FSFSFSSTKGGQSAGAGSRLSRASNRSLEFFSSHRRRKRSSLRCKRVTQAREKRF-TFVLAVVMGV
FVVCWFPPFFTYSLYGIC-----REAC--QVPETLFKFFWFYGCNSSLNPVIYITIFNQDFRRSFKHILFKKKKTSLQ-----
-----</se
q-data>
</sequence>
<sequence seq-type="Protein">
<seq-name>a2ar_labos</seq-name>
<seq-info><length>1066</length></seq-info>
<seq-data>-----M
DPLNATGMDAF-TAIHLNASWSA-----DSGYS---LAAIASIAALVSFLILFTVVGNIILVVIIVLTSRALK---PQNLFLVSLATA
DILVATLVMPFSLANELMG--YWYFGKV-----WCGIYLALDVLFACTSSIVHLCAISLDRYWSVTQAVEYN--LKRTPKRVKCIIV
IVWLISAFISSPPLL-SIDSNNYIS-----SQPQCMLNDDT-----
-----WYLSSSMAS
FFAPCLIMILVYIRIYQVAKTRTRSMSGKEPRPDGVTQTENGLNKANSPCHGDRENGHCQCPTPSQRTVTIGQQTDDAD
MDESFSSEGKGHKQRQDSQ-----
-----RAKRPGLKSSISKQSARISRVSNKSVDLFASRRRKRSSIAEKKVSQAREKRF-TFVLAVVMGVFVVCWFPPFFSY
SLHAVC-----RDYC--KIPDTLFK-FFWIGYCNSSLNPAIYITIFNRDFRRAFQKILCKSWKKSF-----
-----</seq-data>
</sequence>
<sequence seq-type="Protein">
<seq-name>a2ab_human</seq-name>
<seq-info><length>1066</length></seq-info>
<seq-data>-----
-----MDHQDPYS---VQATAAIAAAITFLILFTIFGNALVILAVLTSRSLRA---PQNLFLVSLAAADILVATLIIPFS
LANELLG--YWYFRRT-----WCEVYLALDVLFACTSSIVHLCAISLDRYWAVSRALEYN--SKRTPRRIKCIILTVWLIAAVISLPLI
-YKGDQGPQP-----RGRPQCKLNQEA-----
-----WYLASSIGSFFAPCLIMILVYLR
IYLIAKRSNRRGPRAKGGPGQGESKQPRPDHGGALASAKLPALASVASAREVNGHKSSTGEKEEGETPEDTGTRALPPSW
AALPNSGQGQKEGVCGASPEDEAECEPEQAV-----
-----PVSPASACSPPLQQPQGSRVLATLRGQVLLGRGVGAIGGQWRRRAHV TREKRF-TFVLAVVIGVFVLCWFPPF
FFSYSLGAIC-----PKHC--KVPHGLFQFFFWIGYCNSSLNPVIYITIFNQDFRRAFRRILCRPWTQTAW-----
-----</seq-data>
</sequence>
```

```
<sequence seq-type="Protein">
<seq-name>oar_bommo</seq-name>
<seq-info><length>1066</length></seq-info>
<seq-data>-----MGQAATHDA
NNYTSINYTEIYDVEDEKDVCAVADEPNIPCSFGISLAVP----EWEAICTAIIILTMIIIISTVVGNILVILSVFTYKPLRI---VQNFFI
VSLAVADLTVAILVLPLNVAYSILG--QWVFGIY-----VCKMWLTCDIMCCTSSILNLCAIALDRYWAITDPINYA--QKRTLER
VLFMIGIVWILSLVISSPPLL-GWNDWPEVF-----EPDTPCRLTSQP-----
-----GFV
IFSSSGSFYIPLVIMTVVYFEIYLATKKRLRDRAKATKISTISSGRNKYETKESDPNDQDSVSSDANPNEHQGGTRLVAENEKK
HRTRKLTPKKKPKRRYWSKDDKSHNKLIIPILSNENSVTDIGENLENRNTSSESNSKETHEDNMIEITEAAPVKIQ-----
-----KRPKQNQTNAVYQFIEEKQRISLTRERRA-ARTLGIIMG
VFVVCWLPFFVIYLVIPFC-----VSC--CLSNKFINFITWLGYNLSALNPLIYTIFNMDFRRAFKLLFIKC-----
-----</seq-d
ata>
</sequence>
```

```
<sequence seq-type="Protein">
<seq-name>oar_helvi</seq-name>
<seq-info><length>1066</length></seq-info>
<seq-data>-----MGQAATHV
DANYTLINYTEEVIEDDRDACA VADDPKYPSSFGITLAVP----EWEAICTAIVLTLIIISTIVGNILVILSVFTYKPLRI---VQNFFIV
SLAVADLTVAILVLPLNVAYSILG--QWVFGIY-----VCKMWLTCDIMCCTSSILNLCAIALDRYWAITDPINYA--QKRTLERV
LLMIGVWVWLSLISSPPLL-GWNDWPDVF-----EPDTPCRLTSQP-----
-----GFVI
FSSSGSFYIPLVIMTVVYFEIYLATKKRLRDRAKATKISTISSGQNKYNNKD-DHHDQDSVSSEANHNEHQGVTRLVSDNEKK
KRTRKLTPKKKPKRKYWSKDDKSQNKLIIPILSNENSVTDMGENLENRNTSSESNSKETHEDDLIEVNETVPVKTHH-----
-----KKPKPNQQSAVYQFIEEKQRISLTRERRA-ARTLGIIM
GVFVVCWLPFFVIYLVIPFC-----ASC--CLSNKFINFITWLGYNLSALNPLIYTIFNMDFRRAFKLLCMKP-----
-----</se
q-data>
</sequence>
```

```
<sequence seq-type="Protein">
<seq-name>q93127</seq-name>
<seq-info><length>1066</length></seq-info>
<seq-data>-----
---MSGGEASITGR TAPELNASAAPLDDERE----LGETVAATAALLAILVTIVGNLSLVISVFTYRPLRS---VQNFFVSLAVADL
TVALFVLPLNVAYRLLN--QWLLGSY-----LCQMWTCDILCCTSSILNLCVIALDRYWAITDPINYA--QKRTIRRVNTMIAAV
WALSIVISVPPLL-GWNDWPAQF-----TEDTPCTLTQER-----
-----LFVVYSSSGS
FFIPLIIMSVVYAKIFFATKRRLRERTR--KLGTLAVPAPPQRTSSRPLAELESVASQEDET EPSPEPEPLSSR-----
-----
----ADKPANGISVHQFIEEKQRISLSKERKA-ARVLGVMGVFVVCWLPFFLMYAIVPFC-----TNC-APPSQRVVDFVTWL
GYVNSSLNPIIYTIYNKDFRTAFSRLRCDRRMS-----
```



-----</seq-data>  
</sequence>  
<sequence seq-type="Protein">  
<seq-name>oar1\_locmi</seq-name>  
<seq-info><length>1066</length></seq-info>  
<seq-data>-----MVRVELQA  
ASLMNGSSAAEEPQDALVGGDACGRRPPSVLGVRLAVP----EWEVAVTAVSLSLIILITIVGNVLVLSVFTYKPLRI---VQ  
NFFIVSLAVADLTVAVLVMPFNVAYS LIQ--RWVFGIV-----VCKMWLTCDVLCCTASILNLCAIALDRYWAITDPINYA--QK  
RTLRRVLAMIAGVWLLSGVISSPPLI-GWNDWPMEF-----NDTTPCQLTEEQ-----  
-----GYVIYSSLGSFFIPLFIMTIVYVEIFIATKRRLRERAKASKLNSAMKQQMAAQAVPSSVPSHDQESVSSETNHNELPPP  
PAPPSKEKRRKTKKSKKKEQAAEEGRFLAPAMVAEDSVTDNSVSVGPVARNHLAEDGYTCTTTTTTTTTTTAVTDSRPR  
TASQKGSTAPP-----TPVQPKSIPVYQFIEEKQRISLSKE  
RRA-ARTLGIIMGVFVVCWLPFFFLMYVIVPFC-----NPSC--KPSPKLVNFITWLGYNALSALNPIIYTIFNLDFFRAFKLLHFKT  
-----</seq-data>

</sequence>  
<sequence seq-type="Protein">  
<seq-name>cab76374</seq-name>  
<seq-info><length>1066</length></seq-info>  
<seq-data>-----MN  
SSGESGGTMTEDYDMTGCG----PPEEETGSNLP----VWEAAAASLTGFLVLATVLGNALVILSVFTYRPLRI---VQNFFIVSL  
AVADLAVAILVMPFNVAYLLG--KWIFGIH-----LCKLWLTCDVLCCTASILNLCAIALDRYWAITDPINYA--QKRTLKRVLA  
TIAGVWILSGAISSPPLA-GWNDWPEEL-----EPGTPCQLTRRQ-----  
-----GYVIY  
SSLGSFFIPLLLMSLVYLEIYLATRRRLRERARQSRINAVQSTRHREADDAEESVSSETNHNERSTPRSHAKPSLIDDEPTEVTI  
GGGGTTSSRRTTGS-----  
-----RAAATTTTVYQFIEERQRISLSKERRA-ARTLGVIMGVFVVCWLPFFFLMYVIVPFC-----PDC-  
-CPSDRMVYFITWLGYNALSALNPLIYTIFNLDYRRAFRLLRIR-----  
-----</seq-data>

</sequence>  
<sequence seq-type="Protein">  
<seq-name>o77254</seq-name>  
<seq-info><length>1066</length></seq-info>  
<seq-data>-----MVRPHTRTMEE  
DGGILWTTTPLPSVTVISEAVNTSSFEMDDVVEAYPSGIAMS----VQEAVGTALSLSFITVFTVVG NVLVICSVFNHRPLRT---  
VQNVFLVSLALADIAVALLVMPFNVAYSIMG--RWVFG LH-----FCELWLTCDVLCCTASILNLCAIALDRYWAHDPINYA--  
QKRTLRRVLLSIFLVWVISALISVPPLI-GWNDWPEQF-----DETTPCRLTQET-----  
-----GYVLYSASGSFFIPLLLIMSIVYLKIFLATRRRLRERANAAAKVPSSATRCAATVEHSVALLQERHPSSEETPPPQHRGQT  
TENRPSLADTSVTLEQ-----  
-----NGRPPSVKVFTCWEERQRISLSRERRA-ARVLGIVMGVFLCWL PFFIMYVTA AFC---

```
-----DHC--VQSDRLVNFITWLG YVNSALNPVIYTVFNTDFRRAFRLCSGNRRTHL-----</seq-data>
-----</sequence>
<sequence seq-type="Protein">
<seq-name>dcd_r_xenla</seq-name>
<seq-info><length>1066</length></seq-info>
<seq-data>-----
---MENFSIFNVTV---NVWHADLDVGNDS----LSLRALTGLLLSLLILSTLLGNTLVCLAVIKFRHLRSK--VTNFFVISLAVSDFL
VALLVMPWKAVTEVAG--FWVFGD-----FCDTWVAFDIMCSTASILNLCIISLDRYWAIASPFRIE--RKMTQRVAFIMIGV
AWTLSILISFIPVQLSWHKSHEADEELN-----GVNHTENCDSSSLNR-----
-----TYAISSSL
ISFYIPVVIMIGTYTRIYRIAQTQIRRISSLERAVEHAQRCSSRLSNENSL-----
-----KTSFRKETKV-LKTLSIIMGVFVFCWLPFFVLNLCMIPFCHMNLPGQNEPEPPCVSETTFNIFVWFGWANSSLNPIV
Y-AFNADFRKAFSTILGCNRFCSNNVEAVNFSNELVSYHHDSTTFQKDIPVTFNNSHLPNVVDQDQEVLEGTCFDKVSVLST
SHGTRSQKNLHLPAGVQFECEAEITLETITPFTSTGPLECLPQLVADEDRHYTTKLY-----</seq-d
ata>
</sequence>
<sequence seq-type="Protein">
<seq-name>dadr_human</seq-name>
<seq-info><length>1066</length></seq-info>
<seq-data>-----
-----MRTLNTSAMDGTGLVVERD----FSVRILTACFLSLLILSTLLGNTLVCAAVIRFRHLRSK--VTNFFVISLAVSDLLVA
VLVMPWKAVAEIAG--FWPFGS-----FCNIWVAFDIMCSTASILNLCVISVDRYWAISSPFRIE--RKMTPKAAFILISVAWT
LSVLISFIPVQLSWHKAKPTSPSDGNATS-----LAETIDNCDSLSR-----
-----TYAISSSVISF
YIPVAIMIVTYTRIYRIAQKQIRRIAAALERA AVHAKNCQTTTGNGKPV ECSQPESF-----
-----KMSFKRETKV-LKTLSVIMGVFVCCWLPFFILNCILPFC----GSGETQPF CIDSNTFDVFWFGWANSSLNPIIY
-AFNADFRKAFSTLLGCYRLCPATNNAIETVSINNGAAMFSSHHEPRGSISKECNLVYLIPHAVGSS EDLKKEEAAGIARPLE
KLSPALSVILDYD TDVSLEKIQPITQNGQHPT-----</seq-data>
</sequence>
<sequence seq-type="Protein">
<seq-name>grec_balam</seq-name>
<seq-info><length>1066</length></seq-info>
<seq-data>-----
--MEGPPLSPAPADNVTLNVSCGRPATLFDW----ADHRLISLLALAFNLMMV VAGNLLVVMMAV FVHSLKRT---VTNLFIVSLA
CADLLVGMLVLPFSATLEVLD--VWLYGDV-----WCSVWLAVDVW MCTSSILNLCAISLD RYLAVSQPISYP--SLMSTRRAK
QLIAAVWVLSFVICFPPLV-GWDRPGTLIGSR-----GSSACRLTCELTNER-----
-----G
YVIYSALGSFFLPSTVMLFFYGRIYRTAVSTTRAI AQGFRTTKEDEEGR LTLRIHRGRSVTQRAEQAAAGGARAHGQVRLTLS
EPGARRQNKPSFVHCREDSRAKNQYEIYTVVEGDSRPGRRVPQPQRPAKKLSSASQSEDD-----
```

-----SRPPRFISRVSRRNVRHQARRFRMETKA-AKTVGIIVGL  
FILCWLPFFVCYLVRGFC-----ADC---VPPLLFSVFFWLGYCNSAVNPCVYALCSRDFRFAFSSILCKVCRRGAMERRFR  
TLLVGNRSQTEEDCEVAD-----

-----</seq-data>

</sequence>

<sequence seq-type="Protein">

<seq-name>o77408</seq-name>

<seq-info><length>1066</length></seq-info>

<seq-data>-----

-----MSRDIFMKRLRLHLLFDEVAMVTHI----VGDVLSVLLCAVV-LLVLVGNTLVVAAVATSRKLRT---VTNVFIVNLACAD  
LLLGVLVLPFSAVNEIKD--VWIFGHV-----WCQVWLAVDVWLCTASILNLCCISLDRYLAITRPIRYP--GLMSAKRAKTLVA  
GVWLFSFVICPPLI-GWNDGGDGIMDYNGTTATPIPVTTTTQTPVTGRDDVLCNDFNYSTNSNMNTTCTYSGDSSLSTT  
CELTNSR-----

-----GYRIYAALGSFFIPMLVMVFFYLQIYRAAVKTISAYAKGELKTKYSVRENGSKTNSVTLRIHRGGRGP  
STGSSVYRHGSTYGGSAAGAATREGCGDKDAAGGRRFGRQEMDHLVPRKCRSSDASLVTLTGLKCEIIDNGNAKHGPIS  
ELIKGRGKSFFWRKEKKRSVGERESFENSTRNGRSTRALCGGRCLAIETDICSSGECSPRTKRIKEHARATQHNSLPVTPSL  
SSQNEETDAVFVRGTSNSEYKPRRSLSAHKPGHAMRLHMQKFNREKKA-AKTLAIVGAFIMCWMPFFTYLVGAF-----  
---ENC---ISPIVFSVAFWLGYCNSAMNPCVYALFSRDFRFAFRKLLT-CSCKAWSKNRSFRPQTSVPAIQLHCATQDDAKS  
SSDIGPTASGGNGGYT-----</seq-data>

</seq-data>

</sequence>

<sequence seq-type="Protein">

<seq-name>q9ttm9</seq-name>

<seq-info><length>1066</length></seq-info>

<seq-data>-----

-----MTRFDLLSVNFEGRSDGSAGGASAGGSGGG---SGG  
AAASEGRAVDGVPGTAG-SGG--VVGAGSDENNRSSAGEPGAAGAGGEVNGTAAVGGGLVV---SAQGVGVGVFLAAFIL  
MAVAGNLLVILSVACNRHLQT---VTNYFIVNLAVADLLLSATVLPFSATMEVLG--FWAFGRA-----FCDVWAAVDVLCCT  
ASILSLECTISVDRYVGVHRSLKYP--SIMTERKAAAILALLWAVAVVSVGPPLL-GWKEP-----

-----VPPDERFCGITEEA-----

-----GYAVFSSLCSFYLPMAVIVVMYCRVYVVARSTTRSLEAGVKRERKASEVVLRIHC  
RGSSTGDRGHGAMRSTKGHTF-----

-----RSSLSLRLKFSREKKA-AKTLAIVGVFVLCWFP  
FFFVLPLGSLF-----PQLKPSEGVFKVIFWLGYFNVCNPLIYPCSSREFKRAFLRLRCQHHSRRRRRPLW--RAYGHH  
WLASNGG-PRPDCAPGLGAAPREAPLALPAPEATD--TPSAPEAQAPVVGRRKPPYSFRDWRLGPFRRPTTQLRAKVSSLS  
QKIRAGSAPCAEAPCALRSEVEAVSLNVPDAAEGATWQAYELADYSHLRETDI</seq-data>

</seq-data>

</sequence>

<sequence seq-type="Protein">

<seq-name>a1ad\_human</seq-name>

<seq-info><length>1066</length></seq-info>

<seq-data>-----

-----MTRFDLLSVSFEGRSDGSAGGASAGGSGGG---AGGA  
APSEGA VGGVPGGAGGGGG--VVGAGSGEDNRSSAGEPGSAGAGGDVNGTAAVGGGLVV---SAQGVGVGVFLAAFIL  
MAVAGNLLVILSVACNRHLQT---VTNYFIVNLAVADLLLSATVLPFSATMEVLG--FWAFGRA-----FCDVWAAVDVLCCT

ASILSLCTISVDRYVGVRHSLKYP--AIMTERKAAAILALLWVVALVSVGPLL-GWKEP-----  
-----VPPDERFCGITEEA-----  
-----GYAVFSSVCSFYLPMAVIVVMYCRVYVVARSTTRSLEAGVKRERGGKASEVVLRIH  
CRGAATGADGAHG-MRSAKGHTF-----  
-----RSSLSVRLKFSREKKA-AKTLAIVVGVFVLCW  
FPFFVFLPLGSLF-----PQLKPSEGVFKVIFWLGYFNSCVNPLIYPCSSREFKRAFLRLLRCQCRR-RRRRRPLW--RVYGHH  
WRASTSG-LRQDCAPSSGDAPPGLALTALPDPDPEPPGTPEMQAPVASRRKPPSAFREWRLLGPFRRPTTQLRAKVSSL  
SHKIRAGGAQRAEAACAQRSEVEAVSLGVPHEVAEGATCQAYELADYSNLRETDI</seq-data>

</sequence>

<sequence seq-type="Protein">

<seq-name>a1ad\_rabit</seq-name>

<seq-info><length>1066</length></seq-info>

<seq-data>-----MTRFDLLSVTFEGPRPDISAGGSGAGGGAGAGAGAG  
DTASSEPAVGGVPGAAGGGGGGSVVGAGSGEDNRSSAGEPGGAGGGGVEVNGTAAVGGGLV----SAQSVGVGVFLAA  
FILTAVAGNLLVILSVACNRHLQT---VTNYFIVNLAVADLLSATVLPFSATMEVLG--FWAFGRA-----FCDVWAAVDVLC  
TASILSLCTISVDRYVGVRHSLKYP--AIMTERKAAAILALLWVVALVSMGPLL-GWKEP-----

-----VPPDERFCGITEEV-----

-----GYAVFSSVCSFYLPMAVIVVMYCRVYVVARSTTRSLEAGVKRERGGKASEVVLRI  
HCRGAASGADGAPG-TRGAKGHTF-----

-----RSSLSVRLKFSREKKA-AKTLAIVVGVFVLC  
WFPPFFVFLPLGSLF-----PQLKPSEGVFKVIFWLGYFNSCVNPLIYPCSSREFKRAFLRLLRCQCRR-RRRRRPLW--RVY  
HHWRASAGGGPHPCALSAGAALPGAALALTAAPAPS--SAAAPGQAAGARRKPPCAFREWRLGPLRRPTTQLRAK  
VSSLSHKIRAGGAQRAEAACALRSEVEAVALSVAEDNTCQAYELADYRNLRETDI</seq-data>

</sequence>

<sequence seq-type="Protein">

<seq-name>a1aa\_rat</seq-name>

<seq-info><length>1066</length></seq-info>

<seq-data>-----  
-----MVLLSENASEGSNCTHPPAPVN----ISKAILLGVILGGLIIFGVILGNILVILSVACHRHLHS---VTHYYIVNLAVADLLT  
STVLPFSAIFEILG--YWAFGRV-----FCNIWAAVDVLCCTASIMGLCIISIDRYIGVSYPLRYP--TIVTQRRGVRALLCVWVLSL  
VISIGPLF-GWRQP-----APEDETICQINEEP-----

-----GYVLFSALGSFYVPLAAIL  
VMYCRVYVVAKRERGLKSLKTDKSDSEQVTLRIHRKNVPAEGGGVSSAKN-----

-KTHFSVRLKFSREKKA-AKTLGIVVGCFLCWLPPFLVMPIGSFF-----PDFKPSVTFKIVFWLGYLNSCINPIIYPCSSQ  
EFKAFQNVLRICQ---LRRRQSSKHALGYTLHPPSQALEGQHRDMVRIPVGSGETFYKISKTDGVCEWKFSSMPQGSARI  
TVPKQDQACTTARVRSKSLQVCCCVGSSAPRPEENHQVPTIKIHTISLGENGEEV-----</seq-data>

>

</sequence>

<sequence seq-type="Protein">

<seq-name>a1aa\_rabit</seq-name>

<seq-info><length>1066</length></seq-info>

<seq-data>-----  
-----MVFLSGNASDSSNCTHPPAPVN----ISKAILLGVLGGLILFGVLGNILVILSVACHRHLHS--VTHYYIVNLAVADLLLT  
STVLPFSAIFEILG--YWAFGRV-----FCNIWAAVDVLCCTASIISLCVISIDRYIGVSYPLRYP--TIVTQRRGLRALLCVWAFSLV  
ISVGPLF-GWRQP-----APDDETCQINEEP-----  
-----GYVLFSALGSFYVPLTIIL  
AMYCRVYVVAKRESRGLKSGLKTKDSDSEQVTLRIHRKNAPAGGSGVASAKN-----  
-----  
-KTHFSVRLKFSREKKA-AKTLGIVVGCFLCWLPPFLVMPIGSFF-----PDFKPPETVFKIVFWLGYLNSCINPIIYPCSSQ  
EFKKAQNVLKIQC---LRRKQSSKHALGYTLHAPSQALEGQHKDMVRIPVGSGETFYKISKTDGVCCEWKFSSMPRGSARIT  
VPKDQSACTTARVRSKSFLLQVCCCVGPSTPNPGENHQVPTIKIHTISLENGEEV-----</seq-data>  
</sequence>

<sequence seq-type="Protein">  
<seq-name>a1ab\_rat</seq-name>  
<seq-info><length>1066</length></seq-info>  
<seq-data>-----MNPDL  
DTGHNTSAPAHWGELKDDNFTGPNQTSSNSTLPQLD---VTRAISVGLVLGAFILFAIVGNILVILSVACNRHLRT---PTNYFI  
VNLAIADLLSFTVLPFSATLEVLG--YWVLGRI-----FCDIWAAVDVLCCTASILSLCAISIDRYIGVRYSLQYP--TLVTRRKAILA  
LLSVWVLSTVISIGPLL-GWKEP-----APNDDKECGVTEEP-----  
-----FYALFSSL  
GSFYIPLAVILVMYCRVYIVAKRTTKNLEAGVMKEMSNSKELTLRIHSKNFHEDTLSSTKAKGHNP-----  
-----  
-----RSSIAVKLFKFSREKKA-AKTLGIVVGMFILCWLPPFIALPLGSLF-----STLKPPDAVFKVFWLGYFNCS  
LNPIIYPCSSKEFKRAFMRILGCQCRGRRRRRRRRR-LGACAYTYRPWTRGGSLERSQSRKDSLDDSGSCMSGTQRTLPSAS  
PSPGYLGRGTQPPVELCAFPEWKP-GALLSLP--EPPGRRGRLDGSLFTFKLLGDPESPGTEGDTSNNGGCDTTTDLANGQP  
GFKSNMPLAPGHF---</seq-data>  
</sequence>

<sequence seq-type="Protein">  
<seq-name>a1ab\_human</seq-name>  
<seq-info><length>1066</length></seq-info>  
<seq-data>-----MNPDL  
DTGHNTSAPAHWGELKNANFTGPNQTSSNSTLPQLD---ITRAISVGLVLGAFILFAIVGNILVILSVACNRHLRT---PTNYFI  
VNLAMADLLSFTVLPFSAALEVLG--YWVLGRI-----FCDIWAAVDVLCCTASILSLCAISIDRYIGVRYSLQYP--TLVTRRKAI  
LALLSVWVLSTVISIGPLL-GWKEP-----APNDDKECGVTEEP-----  
-----FYALFS  
SLGSFYIPLAVILVMYCRVYIVAKRTTKNLEAGVMKEMSNSKELTLRIHSKNFHEDTLSSTKAKGHNP-----  
-----  
-----RSSIAVKLFKFSREKKA-AKTLGIVVGMFILCWLPPFIALPLGSLF-----STLKPPDAVFKVFWLGYFN  
SCLNPIIYPCSSKEFKRAFRILGCQCRGRRRRRRRRRRLGGCAYTYRPWTRGGSLERSQSRKDSLDDSGSCLSGSQRTLPSA  
SPSPGYLGRGAPPVELCAFPEWKAPGALLSLPAPEPPGRRGRHDSGPLFTFKLLTEPESPGTDGGASNGGCEAAADVAN  
GQPGFKSNMPLAPGQF---</seq-data>  
</sequence>

<sequence seq-type="Protein">

<seq-name>1BOJ</seq-name>  
<seq-info><length>1066</length></seq-info>  
<seq-data>-----MN  
GTEGPNFYVFPFSNKTGVVRSPEAPQYYLAE-----PWQFSMLAAYMFLIMLGFPINFLTLYVTVQHKKLRT---PLNYILLNL  
AVADLFMVFGGFTTTLTSLHG--YFVFGPT-----GCNLEGGFATLGGEIALWLSLVLAIERVYVVCKPMSNF---RFGENHAI  
MGVAFTWVMALACAAPPLV-GWSRYIP-----EGMQCSCGIDYYTPH-----  
-----EETN  
NESFVIYMFVVHFIPLIVIFFCYGQLVFTVKEAAAQQQESAT-----  
-----  
-----TQKAEKEV-TRMVIIMVIAFLICWLPYAGVAFYIFTH----QGSDFG---PIFMTIPAFFAKTSAVYNPVIYI  
MMNKQFRNCMVTTLCCGKNPLGDDEASTTVSKTE----TSQVAPA-----  
-----</seq-data>

</sequence>  
<sequence seq-type="Protein">  
<seq-name>opsv\_chick</seq-name>  
<seq-info><length>1066</length></seq-info>  
<seq-data>-----  
MSSDDDFYLFTNG-SVPGPWDGPQYHIAP-----PWAFLYLTAFMGIVFAVGTPLNAVVLWVTVRYKRLRQ---PLNYILVN  
ISASGFVSCVLSVVFVVASARG--YFVFGKR-----VCELEAFVGTGGLVTGWSLAFALAFERYIVICKPFGNF---RFSSRHALL  
VVVATWLIGVGVGLPPFF-GWSRYMP-----EGLQCSCGPDWYTVG-----  
-----TKYRSE  
YWTWFLFIFCFIVPLSLIIFSYSQLLSALRAVAAQQQESAT-----  
-----  
-----TQKAEREV-SRMVVVMVGSFCLCYVPYAALAMYMVNN----RDHGLD---LRLVTIPAFFSKSACVYNPIIYCF  
MNKQFRACIME-TVCGKPLTDDSDASTSAQRTEVSSVSSQVGP-----  
-----</seq-data>

</sequence>  
<sequence seq-type="Protein">  
<seq-name>opsr\_anoca</seq-name>  
<seq-info><length>1066</length></seq-info>  
<seq-data>-----MAGTVTEAWDVA  
VFAARRRNEDEDDTTRDSLFTYTNSNNTRGPFEGPNYHIAP-----RWVYNITSVWMIFVVIASIFTNGLVLVATAKFKKLRH-  
--PLNWILVNLAIDLGETVIASISVINQISG--YFILGHP-----MCVLEGYTVSTCGISALWLSLAVISWERWVVVCKPFGNV---  
KFDAKLAVAGIVFSWVWSAVWTAPPVF-GWSRYWP-----HGLKTSCGPDVFSGS  
-----  
-----DDPGVLSYMIVLMITCCFIPLAVILLCYLQVWLAIRAVAAQQKESES-----  
-----  
-----TQKAEKEV-SRMVVVMIIAYCFCWGPYTVFACFAAAN-----PGYAFH---PLAAALPAYFAKS  
ATIYNPIIYVFMNRQFRNCIMQ--LFGKKVDDGSELS-STSRTEVSSVSNSVSPA-----  
-----</seq-data>

</sequence>  
<sequence seq-type="Protein">

<seq-name>trfr\_human</seq-name>  
<seq-info><length>1066</length></seq-info>  
<seq-data>-----  
-----MENETVSELNQTQLQPRAVVA---LEYQVVTILLVLIICGLGIVGNIMVVVLMVVRTKHMRT---PTNCYLVS LAVAD  
LMVLVAAGLPNITDSIYG--SWVYGYV-----GCLCITYLQYLGINASSCSITAFTIERYIAICHPIKAQ--FLCTFSRAKKIIFVWAF  
TSLYCMLWFFLLDLNIST-----YKDAIVISCGYKIS-----  
-----RNYYSPIYLMDFGVFYVV  
PMILATVLYGFIARILFLNPIPSPDKENSKTWKNDSTHQNTNLNVNTSNRCFNS-----  
-----  
-----TVSSRKQV-TKMLAVVVILFALLWMPYRTL VVVNSFL-----SSPFQENWFLFCRICALNSAINPVIYNLMS  
QKFRAAFRKL CNCKQKPTK PANYSVALNYSVIKESDHFSTELDDITVTDTYLSATKVSFDDTCLASEVSFSQS-----  
-----</seq-data>

</sequence>  
<sequence seq-type="Protein">  
<seq-name>gpra\_human</seq-name>  
<seq-info><length>1066</length></seq-info>  
<seq-data>-----MASSTTRGPRVSDLF  
SGLPPAVTTPANQSAEASAGNGSVAGADAPAVTPFQSLQLV----HQLKGLIVLLYSVVVVVGLVGNCLLVLIARVPRLHN-  
--VTNFLIGNLALS DVMCTACVPLTLAYAFEP-RGWVFGGG-----LCHLVFFLQPVTVYVSVFTLTITIAVDRYVVLVHPLR----  
-RASRCASAYAVLAIWALS AVLALPPAVHTYHV-----ELKP-HDVRLCEEFWGS-----  
-----  
--QERQRQLYAWG LLLV TYLLPLL VILLSYVRVSVKLRNRVVP GCVTQS QADW-----  
-----  
-----DRARRRRT-FCLLVVVVVVFAVCWLPLHVFNLLRDLD---PHAIDPYAF---GLVQLLCHWLA  
MSSACYNPFIYAWLHDSFREELR KLLVAWPRKIAPHGQNMTVSVVI-----  
-----</seq-data>

</sequence>  
<sequence seq-type="Protein">  
<seq-name>ny2r\_human</seq-name>  
<seq-info><length>1066</length></seq-info>  
<seq-data>-----MGPIGAEAD  
ENQTVEEMKVEQYGPQTTPRGELVPDPEPELIDSTKL-----IEVQVVLILAYCSIILG VIGNSLVIHVVIKFKSMRT---VTNFFI  
ANLAVADLLVNTLCLPFTLYTLMG--EWKMGPV-----LCHLVPYAQGLAVQVSTITLTVIALDRHRCIVYHLES----KISKRISF  
LIIGLAWGISALLASPLAIFREYS-----LIEIIPDFEIVACTEKWPG-----  
-----EESYIGTVYSLS  
SLLILYVPLPLGIISFSYTRIWSKLNHVSPGAANDH-----  
-----  
-----YHQRQKT-TKMLVCVVVVFAVSWLPLHAFQLAVDID---SQVLDLKEY---KLIFTVFHIIAMCSTFANPLLYGWMNS  
NYRKAFLSAFRCEQRLDAIHSEVSVTFKAKKNLEVRKNSGPNDSFTEATNV-----  
-----</seq-data>

</sequence>  
<sequence seq-type="Protein">

<seq-name>ny6r\_rabbit</seq-name>  
<seq-info><length>1066</length></seq-info>  
<seq-data>-----ME  
VSLNDPASNKTSAKSNSSAFFYFESCQSP-----SLALLLLLIAYTVVLIMGICGNLSLITIIFFKKQREAQN--VTNILIANLSLSDI  
LVCVMCIPFTAIYTLMD--RWIFGNT-----MCKLTSYVQSVSISVSIFSLVLIARIERYQLIVNPRGW----KPSASHAYWGIIMLIW  
LFSLLLSIPLLLSYHLTDEP-----FRNLSLPTDLYSHHVVCVEHWP-----  
-----SKTNQLLYSTSLIM  
LQYFVPLGFMFICYLKIVICLHKRNSKIDRRRENES-----  
-----  
----RLTENKRI-NTMLISIVVTF AACWLP LNTFNVIDWY--HEVLMSCHH---DLVFAICHLVAMVSTCINPLFYGFLNRNFQ  
KDLVVLIHHCLCFALRERYENIAIST---LHTDESKGSLRVAHIPAGI-----  
-----</seq-data>

</sequence>  
<sequence seq-type="Protein">  
<seq-name>ny4r\_human</seq-name>  
<seq-info><length>1066</length></seq-info>  
<seq-data>-----MNTSHL  
LALLLPKSPQGENRSKPLGTPYNFSEHCQDS-----VDVMVFIVTSYSIETVVGVLGNLCLMCVTVRQKEKAN---VTNLLIA  
NLA FSDFLMCLLCQPLTAVYTIMD--YWIFGET-----LCKMSAFIQCMSVTVSILSLVLVALERHQLIINPTGW----KPSISQAY  
LGIVLIWVIACVLSLPFLANSILENVF-----HKNHSKALEFLADKVVCTESWP-----  
-----LAHHR  
TIYTTFLLLFQYCLPLGFILVCYARIYRRLQRQGRV FHKGTYSL-----  
-----  
-----RAGHMKQV-NVVLVVMVVAFAVLWLPLHVFNSLEDWH--HEAIPICHG---NLIFLVCHLLAMASTCVNPF  
IYGFLNTNFKKEIKALVLTCCQSAPLEESEHLPLST---VHTEVSKGSLRLSGRSNPI-----  
-----</seq-data>

</sequence>  
<sequence seq-type="Protein">  
<seq-name>nk3r\_mouse</seq-name>  
<seq-info><length>1066</length></seq-info>  
<seq-data>-----MASVPTGENWTDGTAGVGSHT  
GNLSAALGITEWLALQAGNFSSALGLPVTSQAPSQVRDNL TNQFVQP-----SWRIALWSLAYGLVVAVAVFGNLIVIWII  
AHKRMRT---VTNYFLVNLA FSDASVA AFNTLVNFIYGVHS--EWYFGAN-----YCRFQNFPPITAVFASIYSMTAIAVDRYM  
AIIDPLKP---RLSATATKIVIGSIWILAFLLAFPQCLYSKIK-----VMPGRTL CYVQ  
WPE-----  
-----GPKQHFTYHIIIVLVYCFPLLIMGVTYTIVGITLWGGEILGDTCDKYHE-----  
-----  
-----QLKAKRKV-VKMMIIVVTF AICWLPYHVYFILTAIY----QQLNRWK--YIQQVYLASF  
WLAMSSTMYNPIIYCCLNKRFRAGFKRAFRWC PFIQVSSYDELELKTTRFHPTRQP-----  
-----</seq-data>

</sequence>  
<sequence seq-type="Protein">



<seq-name>nk2r\_bovin</seq-name>  
<seq-info><length>1066</length></seq-info>  
<seq-data>-----M  
GACVVMTDINISSGLDSNATGITAFSMP-----GWQLALWTAAYLALVLVAVMGNATVIWILAHQRMRT---VTNYFIV  
NLALADLCMAAFNAAFNFVYASHN--IWYFGRA-----FCYFQNLFPITAMFVSIYSMTAIAADRYMAIVHPFQP---RLSAPG  
TRAVIAGIWLVALALAFPQC FYSTIT-----TDEGATKCVVAVWPE-----  
-----DSGGKML  
LLYHLIVIALIYFLPLVVMFVAYSVIGLTLWRRSVPGHQA HGANLR-----  
-----  
-----HLQAKKKF-VKTMVLVVVTF AICWLPHYLYFILGTFQ----EDIYCHK--FIQQVYLALFWLAMSSSTMYPNI  
IYCCLNHRFRSGFRLAFRCCPWVTPTEEDKMELTYTPSLSTRVNRCHTKEIFFMSGDVAPSEAVNGQAESPQAGVSTEP----  
-----</seq-data>

</sequence>  
<sequence seq-type="Protein">  
<seq-name>cckr\_xenla</seq-name>  
<seq-info><length>1066</length></seq-info>  
<seq-data>-----MESLRSLSNISALHELLC  
RYSNLSGTLTWNLSTNGTHNLTANWPPWNLNCTPILDRKKPSPSDLNLWVRIVMYSVIFLLSVFGNTLIIVLVMNKRLR  
T---ITNSFLLSLALSDLMVAVLCMPFTLIPNLME--NFIFGEV-----ICRAAAYFMGLSVSVSTFNLVAISIERYS AICNPLKSR--V  
WQTRSHAYRVIAATWVLSSII MIPYL VYNKTVTFP-----MKDRRVGHQCRLVWP-----  
-----  
---SKQVQQAWYVLLL TILFFIPGVVMIVAYGLISRELYRGIQFEMDLNKEAK-----AHKNGVSTPTTIPSGDEGDGCYI  
QVTKRRNTMEMSTLTPSVCTKMDRARINNSEA-----  
-----KLMAKKRV-IRMLIVIVAMFFICWMP IFVANTWKAF  
D----ELSAFNT--LTGAPISFIHLLSYTSACVNPLIYCFMNRFRKAFLGTFSSCIKPCRNF RDTE DIAATGASLSKFSYTTVSSL  
GPA-----</seq-data>

>  
</sequence>  
<sequence seq-type="Protein">  
<seq-name>gasr\_human</seq-name>  
<seq-info><length>1066</length></seq-info>  
<seq-data>-----MELLKLNRS  
VQGTGPGPGASLCRPGAPLLNSSSVGNLSCEPPRIRGAGTR-ELELAIRITLYAVIFLMSVGGNMLIIVVLGLSRRLRT---VTN  
AFLLSLAVSDLLAVACMPFTLLPNLMG--TFIFGTV-----ICKAVSYLMGVS SVSTLSLVAIALERYSAICRPLQAR--VWQTR  
SHAARVIVATWLLSGLLMVPYPVY--TVVQP-----VGPRVLQCVHRWP-----  
-----SAR  
VRQTWSVLLLLLFFIPGVVMAVAYGLISRELYLGLRFDGSDSDS QSRVRNQGGLPGAVHQNGRCRPETGAVGEDSDGC  
YVQLPRSRPALELTALTAPGPGSGSRPTQA-----  
-----KLLAKKRV-VRMLLVIVVLF FLCWLPVYSANTWRAFD--  
---GPGAHRA-LSGAPISFIHLLSYASACVNPLVYCFMHRRFRQACLET CARCCPRPPRARPRALPDED PPTPSIASLSRSLSYTT  
ISTLGPG-----</seq-dat

a>

```
</sequence>
<sequence seq-type="Protein">
<seq-name>gpro_human</seq-name>
<seq-info><length>1066</length></seq-info>
<seq-data>-----MLCPSKTDGSGHSGRIHQETHGEGKRDKISN
SEGRENGGRGFQMNGGSLEAEHASRMSVLRKPMNSQRLLLSPGSPRTGSI----SYINIIMPSVFGTICLLGIIGNSTVIF
AVVKKSKLHWCNNVPDIFIINLSVVDLLFLLG-MPFMIHQLMGN-GVWHFGET-----MCTLITAMDANSQFTSTYILTAMA
IDRYLATVHPISST--KFRKPSVATLVICLLWALSFSITPVWLYARLIPFP-----GGAV
GCGIRLPN-----
-----PDTDLYWFTLYQFFLAFALPFVVITAAYVRILQRMTS-----
-----
-----SVAPASQRSIRLRTKRV-TRTAIAICLVFFVCWAPYYVLQ-LTQLS----ISRPTLT---FVYLYNAA
ISLGYANSCLNPFVYIVLCETFRKRLVLSVKPAAQGQLRAVSNAQTADEERTESKGT-----
-----</seq-data>
```

```
</sequence>
<sequence seq-type="Protein">
<seq-name>gals_human</seq-name>
<seq-info><length>1066</length></seq-info>
<seq-data>-----
-----MNVSGCPGAGNASQAGGGGGW-----HPEAVIVPLLALIFLVGTVGNTLVLAVLLRGGQAVS---TTNLFILNLGVA
DLCFILCCVPFQATIYTLD--GWVFGSL-----LCKAVHFLIFLTMHASSFTLAAVSLDRYLAI RYPLHSR--ELRTPRNALAAIGLI
WGLSLLFSGPYLS-YYRQS-----QLANLTVCHPAWSAP-----
-----RRRAMDICTFV
SYLLPVLVGLTYARTLRYLWRAVDPVAAGSG-----
-----
---ARRAKRKV-TRMILIVAALFCLCWMPHHALILCVWFG----QFPLTRA---TYALRILSHLVSYANSCVNPVIYALVSKHFRK
GFRTICAGLLGRAPGRASGRVCAAARGTHSGSVLERESSDLLHMSEAAGALRPCPGASQPCILEPCPGPSWQGPKAGDSIL
TVDVA-----</seq-data>
```

```
</sequence>
<sequence seq-type="Protein">
<seq-name>ssr1_human</seq-name>
<seq-info><length>1066</length></seq-info>
<seq-data>-----MFPNGTASSPSSSPS
PSPGSCGEGGSRGPGAGAADGMEEPGRNASQNGTLSEG-----QGSAILISFIYSVCLVGLCGNSMVIIYVILRYAKMKT
---ATNIYILNLAIADPELLMLS-VPFLVTSTLLR--HWPFGAL-----LCRLVLSVDAVNMFSTSIYCLTVLSVDRYVAVVHPIKAA--R
YRRPTVAKVVNLGVVWVLSLLVILPIVVFSTRTAANS-D-----TVACNMLMPE-----
-----
PAQRWLVGFLVYTFMGLFLLPVGAICLCYVLIIAKMRMVALKAGWQ-----
-----
-----QRKRSEKI-TLMVMMVVMVFVICWMPFYVQLVNVFA-----EQD---DATVSQLSVILGY
ANSCANPILYGFLSDNFKRSFQIRILCLSWMDNAAEEPVDYYATALKSRAYSVEDFQPENLESQGVFRNGTCTSRITTL-----
-----</seq-data>
```

</sequence>  
<sequence seq-type="Protein">  
<seq-name>oprk\_human</seq-name>  
<seq-info><length>1066</length></seq-info>  
<seq-data>-----MESP IQIFRGE PGPTC  
APSACLPPNSSAWFPGWAEPDSNGSAGSEDAQLEPAHIS-----PAIPVIITAVYSVVFVGLVGNLSLVMFVIIRYTKMKT---  
ATNIYIFNLALADALVTTT-MPFQSTVYLMN--SWPFGDV-----LCKIVISIDYYNMFTSIFTLTMMMSVDRIYAVCHPVKAL--D  
FRTP LKAKIINICIWLLSSSVGISAIVLGGTKVREDVD-----VIECSLQFPD-----  
-----DDYS  
WWDLFMKICVFIFAFVIPVLIIVCYTLMILRLKSVRLLSGSR-----  
-----  
-----EKDRNL RRI-TRLVLVVAVFVVCWTPIHIFILVEALG-----STSHST-AALSSYYFCIALGYTNSSLNPILYAFL  
DENFKRCFR-DFCFPLKMRMERQSTSRVRNTVQDPAY-LRDIDGMNKPV-----  
-----</seq-data>

</sequence>  
<sequence seq-type="Protein">  
<seq-name>ki01\_human</seq-name>  
<seq-info><length>1066</length></seq-info>  
<seq-data>-----  
-----MINSTSTQPPDESCSQNL-----LITQQIIPVLYCMVFIAGILLNGVSGWIFFYVPSKS----FIIYLNIVIADFVMSLT-  
FPFKILGDSGL-GPWQLNVF-----VCRVSAVLFYVNMYSIVFFGLISFDRIYKIVKPLWTS--FIQSVSYSKLLSVIVWMLMLL  
LAVPNIILT NQSVR-----EVTQIKCIELKSEL-----  
-----GRKWHKASNYIFVAIFWIVFLL  
LIVFYTAITKKIFK-----  
-----SHLKSSRNSTSVKKKS-S  
RNIFSIVFVFFVCFVPYHIARIPYTKS--QTEAHYSCQSKEILRYMKEFTLLL SAANVCLDPIIYFFLCQPFREILCKKLHIPLKAQN  
DLDISRIKRGNTTLESTDL-----  
-----</seq-data>

</sequence>  
<sequence seq-type="Protein">  
<seq-name>p2yr\_human</seq-name>  
<seq-info><length>1066</length></seq-info>  
<seq-data>-----MTEVLWPAVP  
NGTDA AFLAGPGSSWGNSTVASTAAVSSSFKCALTKT-----GFQFYLPVAVYILVFIIGFLGNSVAIWMFV FHMKPWS---G  
ISVYMFNLALADFLYVLT-LPALIFYFYNK-TDWIFGDA-----MCKLQRFIFHVNLVYGSILFLTCSAHRYSGVVYPLKSL--GRLK  
KKNAICISVLVWLIVVVAISPILFYSGTGVR-----KNKTITCYDTSDE-----  
-----YLRSYFI  
YSMCTTVAMFCVPLVLILGCYGLIVRALIY-----  
-----  
----KDLDNSPLRRKS-IYLVII VLVFAVSYIPFHV MKTMNLRARLDFQTPAMCAFNDRVYATYQVTRGLASLNSCVDPILYFL  
AGDTRRRRLSRATRKASRRSEANLQSKSEDMTLNILPEFKQNGDTSL-----  
-----</seq-data>

</sequence>  
<sequence seq-type="Protein">  
<seq-name>tda8\_mouse</seq-name>  
<seq-info><length>1066</length></seq-info>  
<seq-data>-----  
-----MAMNSMCIEEQR-----HLEHYLFPVVYIIVFIVSVPANIGSLCVSFLQAKKEN---ELGIYLFSLSDLLYALT-L  
PLWINYTWNK-DNWTFSPT-----LCKGSVFFTYMNFYSSTAFLTCIALDRYLAVVYPLKFS--FLRTRRF AFITSLSIWILESFFN  
SMLLWKDETSVEYCDSD-----KSNFTLCYDKYPLE-----  
-----KWQINLNLFRTCMGYAIP  
LITIMICNHKVYRAVRH-----  
-----NQATENSEK  
RRI-IKLLASITLTFVLCFTPFHVMVLIRCVL--ERDMNVNDKSGWQFTFTVYRVTVALTSLNCVADPILYCFVTETGRADMWN  
ILKLCRKHNRHQGKKRDILSVSTRDAVELEIID-----  
-----</seq-data>

</sequence>  
<sequence seq-type="Protein">  
<seq-name>thrr\_mouse</seq-name>  
<seq-info><length>1066</length></seq-info>  
<seq-data>-----MGP RRLI VALGLSLCGPLLSSRVPM SQPESERTDATVNPRSFF  
LRNPSENTFELVPLGDEEEEEKNESVLLEGRAVYLNISLPPHTPPPPFISEDASGYLTS-----PWLTLFMPSVYTIVFIVSLPLN  
VLAIAVFLVRMKVKK---PAVVYMLHLAMADVLFVSV-LPFKISYYFSG-TDWQFGSG-----MCRFATAAFYGNMYASIMLM  
TVISIDRFLAVVYPIQSL--SWRTLGRANFTCVVIWVMAIMGVVP LLLKEQTTRVP-----  
---GLNITTCHDV LSEN-----  
-----LMQGFYSYFSAFSAIFFLVPLIVSTVCYTSIIRCLSS-----  
-----SAVANRSKKSRA-LFLSAAVFCIFIVCFGPTNVLLIVHYLF-----LSDSPGTEAAYFA  
YLLCVCVSSVSCCIDPLIYYYASSECRHLYSILCCKESSDPNSCNSTGQLMPSKMDTCSHLNNSIYKKLLA-----  
-----</seq-data>

</sequence>  
<sequence seq-type="Protein">  
<seq-name>o43495</seq-name>  
<seq-info><length>1066</length></seq-info>  
<seq-data>-----MNGTYNTCGSSDLTWP---PAIKLGFYAYLGVLLVLG LLLNSLALWVFCCRMQQWT---ETRIYMTNLAVADL  
CLLCT-LPFVLHSLRDT-SDTP-----LCQLSQGIYLTNRYMSISLVTAIAVD RYVAVRHPLRAR--GLRSPRQAAAVCAVLW  
VLVIGSLVARWLLGIQE-----GGFCFRST-----  
-----RHNFN SMRFPLLGFYLP  
LAVVVFCSLKVVTAL AQR PPTDV-----  
-----GQAE  
ATRKA-ARMVWANLLVFVVCFLPLHVGLTVRLAV----GWNACALLETIRRALYITSKLS DANCLDAICYYYMAKEFQEASA  
LAVAPRAKAHKSQDSL CVTLA-----  
-----</seq-data>

```
</sequence>
<sequence seq-type="Protein">
<seq-name>ccr4_human</seq-name>
<seq-info><length>1066</length></seq-info>
<seq-data>-----ME
GSIYTSNDNYTEEMGSGDYDSMKEPCFREENA-----NFNKIFLPTIYSIIFLTGIVGNGLVILVMGYQKKLRS---MTDKYRLHLS
VADLLFVIT-LPFWAVDAVAN---WYFGNF-----LCKAVHVIYTVNLYSSVLILAFISLDRYLAIVHATNSQ--RPRKLLAEKVYVY
GVWIPALLLTIPDFIFANVSE-----ADDRYICDRFYPN-----
-----DLWVVVFQFQHI
MVGLILPGIVILSCYCIISKLSH-----
-----SKGH
QKRKA-LKTTVILILAFFACWLPYYIGISIDFSI-LLEIIKQGCEFENTVHKWISITEALAFFHCCLNPILYAFLGAKFKTSAQHALTS
VSRGSSLKILSKGKRGGHSSVSTESSESSFHSS-----
-----</seq-data>
```

```
</sequence>
<sequence seq-type="Protein">
<seq-name>ccr3_human</seq-name>
<seq-info><length>1066</length></seq-info>
<seq-data>-----MVLEVSDHQVL
NDAEVAALLENFSSSYDYGENESDSCCTSPPCPQDFSL-----NFDRAFLPALYSLLFLLGLLNGAVAAVLLSRRTALS---STD
TFLHLAVADTLLVLT-LPLWAVDAAVQ---WVFGSG-----LCKVAGALFNINFYAGALLACISFDRYLNIVHATQLY--RRGP
PARVTLTCLAVWGLCLLFFALPDFIFLSAHHDE-----RLNATHCQYNFP-----
-----QV
GRTALRVLQLVAGFLLPLLVMAYCYAHILAVLLV-----
-----
-----SRGQRRLRA-MRLVVVVVAFALCWTPYHLVVLVDILM-DLGALARNCGRESRVDVAKSVTSGLGVMHCCL
NPLLYAFVGVKFRERMWMLLLRLGCPNQRGLRQPSSSRDSSWSETSEASYSGL-----
-----</seq-data>
```

```
</sequence>
<sequence seq-type="Protein">
<seq-name>ckr9_human</seq-name>
<seq-info><length>1066</length></seq-info>
<seq-data>-----M
ADDYGSESTSSMEDYVNFNFTDFYCEKNNVR-----QFASHFLPPLYWLVFIVGALGNSLVILVYWYCTRVT---MTDMFLL
NLAIAADLLFLVT-LPFWAIAAADQ---WKFQTF-----MCKVVNSMYKMNFYSCVLLIMCISVDRYIAIAQAMRAHTWREKRL
LYSKMVCFTIWWLAAALCIPEILYSQIKE-----ESGIAICTMVYPSD-----
-----ESTKLKS
AVLTLKVILGFFLPFVVMACCYTIIHTLIQ-----
-----
-----AKKSSKHKA-LKVTITVLTVFVLSQFPYNCILLVQTID-AYAMFISNCAVSTNIDICFQVTQTIAFFHSCLNPVLYVFGER
FRRDLVKTLKNLGCISQAQWVSFTRREGSLKLSSMLLETTSGALS-----
-----</seq-data>
```

```
</sequence>
<sequence seq-type="Protein">
<seq-name>ckr6_human</seq-name>
<seq-info><length>1066</length></seq-info>
<seq-data>-----MSGESM
NFSDVFDSSSEDYFVSVNTSYYSDSEMLLCSLQEV-----QFSRLFVPIAYS LICVFGLLNILVVITFAFYKKARS---MTDVYLL
NMAIADILFVLT-LPFWAVSHATG--AWVFSNA-----TCKLLKGIYAINFNCGMLLLTCISMDRYIAIVQATKSFRLRSRTLPRS
KIICLVVWGLSVIISSTVFVNQKYN-----TQGS DVCEPKYQTVS-----
-----EPIRWKLL
MLGLELLFGFFIPLMFMIFCYTFIVKTLVQ-----
-----
-----AQNSKRHKA-IRVIIAVVLVFLACQIPHNMVLLVTAAN--LGKMNRSQCSEKLIGYTKTVTEVLAFLHCCLNPVLYAFIG
QKFRNYFLKILKDLWCVRRKYKSSGFSCAGRYSENISRQTSETADNDNASSFTM-----
-----</seq-data>
```

```
</sequence>
<sequence seq-type="Protein">
<seq-name>il8a_human</seq-name>
<seq-info><length>1066</length></seq-info>
<seq-data>-----MSNI
TDPQMWFDDLNFTGMPPADEDYSPCM-LETE-----TLNKYVVIIAYALVFLSLLGNSLVMLVILYSRVGRS---VTDVYLLN
LALADLLFALT-LPIWAASKVNG---WIFGTF-----LCKVVSLLKEVNFYSGILLACISVDRYLAI VHATR TL---TQKRHLVKFVC
LGCWGLSMNLSLPPFLFRQAYHP-----NNSSPVCYEV LGN-----
-----DTAKWRMVL
RILPHTFGFIVPLFVMLFCYGFTLRTLK-----
-----
---AHMGQKHRA-MRVIFAVVLIFLLCWL PYNLVLLADTLM-RTQVIQETCERRNNIGRALDATEILGFLHSCLNPIIYAFIGQ
NFRHGFLKILAMHGLVSKEFLARHRVTSYSSSVNVSSNL-----
-----</seq-data>
```

```
</sequence>
<sequence seq-type="Protein">
<seq-name>c3x1_human</seq-name>
<seq-info><length>1066</length></seq-info>
<seq-data>-----
--MDQFPESVTENFEYDDLAEACYIGDIV-----VFGTVFLSIFYSVIFAIGLVGNLLVVFALTNSKKPKS---VTDIYLLNLALSDLL
FVAT-LPFWTHYLINE---KGLHNA-----MCKFTTAAFFFIGFFGSIFFITVISIDRYLAIVLAANSM--NNRTVQHGV TISLGVWA
AAILVAAPQFMFTKQKE-----NECLGDYPEV-----
-----LQEIWPVLRNVETN FLGF
LLPLLIMSICYFRIIQTLS-----
-----CKNHKKA
KA-IKLILLVVIVFFLFWTPYNVMIFLET LK--LYDFFPSCDMRKDLRLALSVTETVAFSHCCLNPLIYAFAGEKFRRYLYHLYGKC
LAVLCGRSVHVD FSSSESQRSRHG SVLSSNFTYHTSDGDALLL-----
-----</seq-data>
```

```
</sequence>
<sequence seq-type="Protein">
<seq-name>ckr2_human</seq-name>
<seq-info><length>1066</length></seq-info>
<seq-data>-----MLSTS
RSRFRIRNTNESGEEVTTFFDYDYGAPCHKFDVK-----QIGAQLLPPLYSLVFIFGFVGNMLVVLINCKKLC---LTDIYLLNLA
ISDLLFLIT-LPLWAHSAANE---WVFGNA-----MCKLFTGLYHIGYFGGIFFIILLTIDRYLAIVHAVFAL--KARTVTFGVVTSVIT
WLVAVFASVPGIIFTKCQK-----EDSVYVCGPYFP-----
-----RGWNNFHTIMRNIL
GLVLPLLIMVICYSGILKTLR-----
-----CRNEK
KRHRA-VRVIFTIMIVYFLFWTPYNIVILLNTFQ--EFFGLSNCESTSQLDQATQVTETLGMTHCCINPIIYAFVGEKFRSLFHIA
LGCRIAPLQKPVCGGPGVRPGKNVKVTTQGLLDGRGKGSIGRAPEASLQDKEGA-----
-----</seq-data>
```

```
</sequence>
<sequence seq-type="Protein">
<seq-name>rdc1_human</seq-name>
<seq-info><length>1066</length></seq-info>
<seq-data>-----MDLHLF
DYAEPGNFSDISWPCNSSDCIVVDTVMCPNMPNK-----SVLLYTLFSIYIFIVIGMIANSVVVWVNIQAKTTGY---DTHCYI
LNLAIADLWVVLTPVWVSLVQH-NQWPMGEL-----TCKVTHLIFSINLFSGIFFLTCMSVDRYLSITYFTNTP--SSRKKMV
RRVVCILVWLLAFVSLPDTYLLKTVTSA-----SNNETYCRSFYPEH-----
-----SIKEWLI
GMELVSVVLGFAVPFSIIAVFYFLLARAISA-----
-----
-----SSDQEKHSS-RKIIFSYYVFLVCWLPYHVAVLLDIFS-ILHYIPFTCRLEHALFTALHVTQCLSLVHCCVNPVLYSFINRN
YRYELMKAFIFKYSAGTGLTKLIDASRVSETEYSALEQNAK-----
-----</seq-data>
```

```
</sequence>
<sequence seq-type="Protein">
<seq-name>ag22_rat</seq-name>
<seq-info><length>1066</length></seq-info>
<seq-data>-----MKDNFS
FAATSRNITSSLPFDNLNATGTNESAFNCCHKPA-----DKHLEAIPVLYYMIFVIGFAVNIVVSLFCCQKGPCK---VSSIYIFN
LAVADLLLLAT-LPLWATYYSYR-YDWLFGPV-----MCKVFGSFLTLNMFASIFFITCMSVDRYQSVIYPFLS---QRRNPWQA
SYVVPLVWCMACLSSLPTFYFRDVRTIE-----YLGVNACIMAFPPE-----
-----KYAQWS
AGIALMKNILGFIPLIFIATCYFGIRKHLK-----
-----
-----TNSYGKNRITRDQV-LKMAAAVVLAFIICWLPFHVLTFLDALT--WMGIINSCEVIAVIDLALPFAILLGFTNSCVNPFLYCFV
GNRFQQQLRSVFRVPITWLQGKRETMSCRKSSSLREMDTFVS-----
-----</seq-data>
```

```
</sequence>
<sequence seq-type="Protein">
<seq-name>ag2s_xenla</seq-name>
<seq-info><length>1066</length></seq-info>
<seq-data>-----
---MLSNISAGENSEVEKIVVKCSKSGMH-----NYIFITIPIIYSTIFVVG VFGNSLVVIVIYSYMKMKT---MASVFLMNLALSDDL
CFVIT-LPLWAVYTAMH-YHWPFGLD-----LCKIASTAITLNLYTTVFLLTCLSIDRYSAIVHPMKSR--IRRTVMVARLTCVGI
WLVAFLASLPSVIYRQIFIFP-----DTNQTVCALVYHS-----
-----GHIYFMVGMMSLVKNI
VGFFIFPVIILTSYTLIGKTLKE-----
-----VYRAQR
ARNDDI-FKMIVAVVLLFFFCWIPHQVFTFLDVLI--QMDVIQNCKMYDIVDTGMPITICIAYFNSCLNPFLYGGFKKFRKHF
LQLIKYIPPKMRTHASVNTKSSTVSQRSLDTKCASNKIALWIFDIEEHCK-----
-----</seq-data>
```

```
</sequence>
<sequence seq-type="Protein">
<seq-name>ag2s_mouse</seq-name>
<seq-info><length>1066</length></seq-info>
<seq-data>-----
----MILNSSIEDGIKRIQDDCPKAGRH-----NYIFVMIPTLYSIIFVVGIFGNSLVVIVIFYMKLKT---VASVLLNLALADLCFL
LT-LPLWAVYTAME-YQWPFGNH-----LCKIASASVSFNLYASVLLTCLSIDRYLAIVHPMKSR--LRRTMLVAKVTCIIIWLM
AGLASLPAVIHRNVYFIE-----NTNITVCAFHYES-----
-----QNSTLPIGLGLTKNILGFV
FPFVIILTSYTLIWKALKK-----
-----AYKIQKNTPRN
DDI-FRIIMAILVFFFSSWVPHQIFSFLDVLI--QLGVIHDCEIADVVDTAMPITICIAYFNNCLNPLFYGFLGKFKRYFLQLLKYI
PPKARSHAGLSTKMSTLSYRPSDNMSSSARKSAYCFEVE-----
-----</seq-data>
```

```
</sequence>
<sequence seq-type="Protein">
<seq-name>brb1_human</seq-name>
<seq-info><length>1066</length></seq-info>
<seq-data>-----M
ASSWPPLELQSSNQSQLFPQNATACDNAPEAW----DLLHRVLPTFIISICFFGLLGNLFVLLVLLPRRQLN---VAEIYLANLA
ASDLVFLVG-LPFWAENIWNQ-FNWPFGAL-----LCRVINGVIKANLFIISIFLVVAISQDRYRVLVHPMASG--RQQRRRQAR
VTCVLIWVVGGLLSIPTFLLRSIQAVP-----DLNITACILLPH-----
-----EAWHFARIV
ELNILGFLLPLAAIVFFNYHILASLRT-----
-----REEVS
RTRVRGPKDSKT-TALILTLVVAFLVCWAPYHFFAFLEFLF--QVQAVRGCFWEDFIDLGLQLANFFAFTNSSLNPVIYVFGVGR
LFRTKVVWELYKQCTPKSLAPISSSHRRKEIFQLFWRN-----
-----</seq-data>
```



```
</sequence>
<sequence seq-type="Protein">
<seq-name>apj_human</seq-name>
<seq-info><length>1066</length></seq-info>
<seq-data>-----
----MEEGGDFDNYYGADNQSECEYTDW-----KSSGALIPAIYMLVFLGTTGNGLVLTWTVFRSSREKRR--SADIFIASLAVA
DLTFVVT-LPLWATYTYRD-YDWPFGTF-----FCKLSSYLIFVNMYASVFCLTGLSFDRLAIVRPVANA--RLRLRVSGAVATA
VLWVLAALLAMPVMVLRRTGDLE-----NTTKVQCYMDYSMVA-T-----
-----VSSEWAVE
VGLGVSSTTVGFVVPFTIMLTCYFFIAQTIAG-----
-----
----HFRKERIEGLRKRRL-LSIIVLVVTFALCWMPYHLVKTLYMLG---SLLHWPCDFDLFLMNIFPYCTCISYVNSCLNPFly
AFFDPRFRQACTSMLCCGQSRCAGTSHSSSGEKSASYSSGHSQGPGPNMGKGGEQMHEKSIPYSQETLVVD-----
-----</seq-data>
```

```
</sequence>
<sequence seq-type="Protein">
<seq-name>gprf_macne</seq-name>
<seq-info><length>1066</length></seq-info>
<seq-data>-----
-MDPEETSVYLDYYYATSPNPDIRESHV-----PYTSVFLPVFYTAVFLTGV LGN-LVLMGALHFKPGSRR--LIDIFIINLAASD
FIFLVT-LPLWVDKEASL-GLWRTGSF-----LCKGSSYMISVNMHCSVFLLTCMSVDRYLAIVCPVVSRR--KFRRTDCAYVCA
SIWFISCLLGLPTLLSRELTLD-----DKPYCAEKKAT-----
-----PLKLIWSLVALIFTFF
VPLLSIVTCYCCIAARKLCA-----
-----HYQQSGKHNK
KLKKS-IKIIIFIVAAFLVSWLPFNSTKLLAIVS---GLQQERYFPSAILQLGMEVSGPLAFANSCVNPFIYYIFDSYIRRAIVHCLCP
CLKNYDFGSSTETSDSHLTALSTFIHAEDFTRRRKRSVSL-----
-----</seq-data>
```

```
</sequence>
<sequence seq-type="Protein">
<seq-name>c3ar_human</seq-name>
<seq-info><length>1066</length></seq-info>
<seq-data>-----
-----MASFSAETNSTDLLSQPWN---EPPVILSMVILSLTFLGLPGNGLVWVAGLKMQR-----VNTIWFLHLLADLL
CCLS-LPFLAHLALQ-GQWPYGRF-----LCKLIPSIIVLNMFASVLLTAISLDRCLVVKPIWCQ--NHRNVGMACSICGCIW
VVAFVMCIPVFVYREIFTD-----NHNRCGYKFGSSSLDYPDFYGDPLENRSLEN
IVQRPGEMNDRLDPSFQTNHPWTVPTVFQPFQTFQRPASDSLPRGSARLTSQNLVSNVFKPADVVSPKIPSGFPIEDHET
SPLDNSDAFLSTHLKLFPSASSNSFYESELPQGFQDYNLGQFTDDDQVPTPLVAITITRLVVGFLPSVIMIACYSFIVFRMQ
RG-----
-----RFAKSQSKT-FRVAVVVAVFLV
CWTPYHIFGVLSLLT-----DPETPLGKTLMSWDHVCIALASANSFNPFlyALLGKDFRKKARQSIQGILEAAFSEELTRSTHC
PSNNVISERNSTTV-----
```

-----</seq-data>  
</sequence>  
<sequence seq-type="Protein">  
<seq-name>fml1\_macmu</seq-name>  
<seq-info><length>1066</length></seq-info>  
<seq-data>-----  
-----NFSTPLSEYEEVSYESAGY-----TVLQILPLVVLGVTFVLGVLGNGLVIWVAGFRMTRT----VTTICYLNLALADFSFT  
AT-LPFLIVSMAMG-EKWPFQWF-----LCKLIHIVVDINLFGSVFLIGFIALDRICICVLHPVWAQ--NHRTVSLAMKVIVGPWI  
LALVLTLPVFLFTTIP-----NGDTYCTFNFAWGGTP-----  
-----EKRLKVAITMLTARGIIRF  
VIGFSMPMSIVATCYGLIAAKIHKK-----  
-----  
GMIKSSRP-LRVLTAVVASFFICWFQFQVALLSTVW---LKEILVDGKYKIINILVNPTSSLAFFNSCLNPMLYVFGQDFRERL  
IHSPTSLELASEDSAPTNDTAASCASPPAETELQAM-----  
-----</seq-data>

</sequence>  
<sequence seq-type="Protein">  
<seq-name>fmlr\_human</seq-name>  
<seq-info><length>1066</length></seq-info>  
<seq-data>-----  
---METNSSLPTNISGGTPAVSAGY-----LFLDIITYLVFAVTFVLGVLGNGLVIWVAGFRMTHT----VTTISYLNLAADFC  
FTST-LPFFMVRKAMG-GHWPFQWF-----LCKFLFTIVDINLFGSVFLIALIALDRICVCLHPVWTQ--NHRTVSLAKKVIIGP  
WVMALLLTLPVIIRVTTVPGK-----TGTVACTFNFSPTNDP-----  
-----KERINVAVAMLTVR  
GIIRFIIGFSAPMSIVAVSYGLIATKIHKQ-----  
-----  
---GLIKSSRP-LRVLSFVAAFFLCWSPYQVVALIATVR---IRELLQGMYSKEIGIAVDVTSALAFFNSCLNPMLYVFMGQDF  
RERLIHALPASLERALTEDSTQTSATNSTLPSAEVALQAK-----  
-----</seq-data>

</sequence>  
<sequence seq-type="Protein">  
<seq-name>oar2\_lymst</seq-name>  
<seq-info><length>1066</length></seq-info>  
<seq-data>-----MMSFPALFADVNSQFRANLVVSSYHH  
AITFPTVRGANFSTFFPRNFSVSADVWLCGANFSQEWQLMQPVCSTKYDS-----ITIFITVAVVLTILTLWTILGNFFVLMAL  
YRYGTLRT---MSNCLIGNLAISDLLAVTVLPSTVHDLG--YWVFGEF-----TCTLWLCMDVLYCTASIWGLCTVAFDRYLA  
TVYVPVWYH--DQRSVRKAVGCIVFVWIFSIVISFAPFI-GWQHMIPSSFS-----FNASIQR  
QCILFT-----  
-----SSSYVLYSSMGSFVIPAILMAFMYVRIFVVLHNQSRGVKFKSGLKISSSKYNGCPVINEPSREGINGLGR  
DVTNTLLSDAVGSSADLTSNGKDDPRVLATAPIELTEDVPPLNGHHHRTVHETPYVSGLHTKRSNSFALPTELEKKCKPLT  
NNILHMMDFFDRRNSHNAVIQRSASEMVNLDVSKHELLISNVCHRKSATALTSETGDPLGSLAGPRRSQCNCVGGVLRNK  
HMTL-----SMKRRFELREQRA-TKRMLLIMACFCVCWMPFLFMYILRSVC-----DTCHM---NQH

```
FVAIIWLGYNSSLNPVLYTLFNDDFKVAFKRLIGARSPSAYRSPGPRR-----</seq-data>
-----</sequence>
<sequence seq-type="Protein">
<seq-name>brs3_human</seq-name>
<seq-info><length>1066</length></seq-info>
<seq-data>-----MAQRQPH
SPNQTLISITNDTESSSSVVSNDNTNKGWSGDNSPG-----IEALCAIYITYAVIISVGILGNAILIKVFFKTKSMQT---VPNIFITS
LAFGDLTLLTLCVPVDATHYLAE--GWLFGR-----GCKVLSFIRLTSVGVSFVTLTILSADRYKAVVKPLERQ--PSNAILKTCVK
AGCVWIVSMIFALPEAIFSNVYTFRDPN-----KNMTFESCTSYPVSK-----
-----KLLQEIHS
LLCFLVFIIPLSIISVYYSLIARTLYK-----
-----STLNIPTEEQ
SHARKQIESRKRI-ARTVLVLVALFALCWLPNHLLYLYHSFT-----SQTYVDPSAMHFIFTIFSRVLAFSNSCVNPFALYWLSKSF
QKHFKAQLFCCAERPEPPVADTSLTTLAVMGTVPGTGSIQMSEISVTSFTGCSVKQAEDRF-----
-----</seq-data>
</sequence>
<sequence seq-type="Protein">
<seq-name>nubr_human</seq-name>
<seq-info><length>1066</length></seq-info>
<seq-data>-----MPSKSL
SNLSVTTGANESGSVPEGWERDFLPASDGTTE-----LVIRCVIPSLYLLIITVGLLGNIMLVKIFITNSAMRS---VPNIFISNLA
AGDLLLLTLCVPVDASRYFFD--EWMFGKV-----GCKLIPVIQLTSVGVSFVTLTALSADRYRAIVNPMDMQ--TSGALLRTCV
KAMGIWVVSVLLAVPEAVFSEVARISL-----DNSSFTACIPYPQTD-----
-----ELHPKIH
SVLIFLVYFLIPLAISIYHYHIAKTLIK-----
-----SAHNLPGEY
NEHTKKQMETRKRL-AKIVLVFVGCIFCWFNPNHILYMYRSFN-----YNEIDPSLGHMIVTLVARVLSFGNSCVNPFALYLLSE
SFRRHFNSQLCCGRKSYQER-GTSYLLSSSAVRMTSLKSNKSNMVTNSVL-LNGHSMKQEMAM-----
-----</seq-data>
</sequence>
<sequence seq-type="Protein">
<seq-name>etbr_human</seq-name>
<seq-info><length>1066</length></seq-info>
<seq-data>-----MQPPSLCGRALVALVLACGLSRIWGEERGFPDRATP
LLQTAEIMTPPTKTLWPKGSNASLARSLAPAEVPGDRTAGSPRTISPPPCQGPPIEK-----ETFKYINTVVSCLVFLGIIGNS
TLLRIYKNCMRN--GPNILIASLALGDLLHIVIDIPINVYKLLAE--DWPFGAE-----MCKLVPIQKASVGITVLSLALSIDRY
RAVASWSRIK--GIGVPKWTAVEIVLIWVVSVVLAVPEAIGFDIITMDY-----KGSYLR
ICLLHPVQKTA-----
-----FMQFYKTAKDWWLFSFYFCLPLAITAFFYTLMTCEMLR-----
-----
-----KKSGMQIALNDHLKQRREV-AKTVFCLVLVVALCWLPNHLKRLKTL-YNQNDPNRCELLS
```

FLLVLDYIGINMASLNSCINPIALYLVSKRFKNCFKSCLCCWCQSFEKQSLEEKQSCLKFKANDHGVDNFRSSNKYSSS-----  
-----</seq-data>  
</sequence>  
<sequence seq-type="Protein">  
<seq-name>gp39\_human</seq-name>  
<seq-info><length>1066</length></seq-info>  
<seq-data>-----  
----MASPSLPGSDCSQIIDHSHVPEFEVA----TWIKITLILVYLIIFVMGLLGNSATIRVTQVLQKKGYLQKEVTDHMOVSLACS  
DILVFLIGMPMEFYIIWNPLTTSSYTL-----SCKLHTFLFEACSYATLLHVLTLSFERYIAICHPRYK--AVSGPCQVKLLIGFV  
WVTSALVALPLLAFAMGTEYPLVNVPSHRGLTCNRSSTRH-----HEQPETSNMSICTNLSS-----  
-----RWT  
VFQSSIFGAFVVYLVVLLSVAFMCWNMMQVLMKSQKGLAGGTRPPQLRKSESE-----  
-----  
-----ESRTARRQT-IIFLRLIVVTLAVCWMPNQIRRIMAAAK--PKHDWTRSYFRAYMILLPFSETF  
FYLSSVINPLLYTVSSQQFRRVFVQVLCRSLQHANHEKRLRVHAHSTTDSARFVQRPLLFASRRQSSARRTEKIFLSTFQSE  
AEPQSKSQSLLESLEPNNGAKPANSAAENGFQEHEV-----</seq-dat  
a>  
</sequence>  
<sequence seq-type="Protein">  
<seq-name>ntr2\_rat</seq-name>  
<seq-info><length>1066</length></seq-info>  
<seq-data>-----  
----METSSPWPFRPSPSAGLSLEARLGVDR--LWAKVLFALYSLIFAFGTAGNALSVMVVKARAGRPG--RLRYHVLAL  
SALLLLVSMPELYNFVWSHYPWVFGDL-----GCRGYFVRELCAATVLSVASLSAERCLAVCQPLRAR--RLTTPRRTRR  
LLSLVWVASLGLALPMAVIMGQKHE-----VESADGEPEPASRVCTVLVS-----  
-----RATL  
QVFIQVNVLVSFALPLALTAFLNGITVNHLMALYSQVPSASAQVSSIPSRLELLSEEGLLGFITWRKTLVSLGVQASLVRHKDAS  
-----  
-----QIRSLQHS-AQVLRAIVAVYVICWLPYHARRLMYCYI--PDDGWTNELYDFYHY  
FYMVTNTLFYVSSAVTPILYNAVSSSRKLFLESLGSLCGEQHSLVPLPQEAPSTTSTYSFRLWGSPPRNPGLGEIQV-----  
-----</seq-data>  
</sequence>  
<sequence seq-type="Protein">  
<seq-name>gp38\_human</seq-name>  
<seq-info><length>1066</length></seq-info>  
<seq-data>-----  
MGSPWNGSDGPEGAREPPWPALPPCDERRCSPFP---LGALVPVTAVCLCLFVVGVSNGVVTVMIGRYSRDMRT---TTNL  
YLGSMASDLLILLG-LPFDLYR-LWRSRPWVFGPL-----LCRLSLYVGEGETYATLLHMTALSVERYLAICRPLRAR--VLVTRR  
RVRALIAVLWAVALLSAGPFLFLVGVEQDPGISVVPGLNGTARIASSPLASS-----PPLWLSRAPPSPSPGPETAEEAALFSR  
ECRPSA-----  
-----QLGALRVMLWVTTAYFFLPFLCLSILYGLIGRELWSSRRPLRGPAASG-----  
-----

-----RERGHRQT-VRVLLVVVLAFIICWLFPFHVGRIIYINT-----EDSRMMYFSQYFN  
IVALQLFYLSASINPILYNLISKKYRAAAFKLLARKSRPRG--FHRSRDTAGEVAGDTGGDTVGYTETSANVKTMG-----  
-----</seq-data>

</sequence>

<sequence seq-type="Protein">

<seq-name>ml1a\_human</seq-name>

<seq-info><length>1066</length></seq-info>

<seq-data>-----

-----MQGNGSALPNASQPVLRGDGARP----SWLASALACVLIFTIVVDILGNLLVILSVYRNKCLRN---AGNIFVVS LAVAD  
LVVAIYPYPLVLM SIFNN--GWNLGYL-----HCQVSGFLMGLSVIGSIFNITGIAINRYCYICHSLKYD--KLYSSKNSLCYVLLIW  
LLTLAAVLPNLRAGTLQYDP-----RIYSCTFAQSV-----

-----SSAYTIAVVVVHFLV  
PMIIVIFCYLRIWILVLQVRQRVKPDRKPKLK-----

PQDFRN-FVTMFVVFVLF AICWAPLNFIGLAVASD-----PASMVPRIP EWLFVASYMAYFNSCLN AIIYGLLNQNF RKEYR  
RIIVSLCTARVFFVDSSNDVADRVKWKPSPLMTNNNVVKVDSV-----

-----</seq-data>

</sequence>

<sequence seq-type="Protein">

<seq-name>gprl\_human</seq-name>

<seq-info><length>1066</length></seq-info>

<seq-data>-----

-----MNSTLDGNQSSHPFCLLAFGYLET---VNFCLEVLII VFLTVLIISGNIIVIFV FHCAPLLNHH--TTSYFIQTMAYADLFV  
GVSCVPSLSLLHHP--LPVEESL-----TCQIFGFVVS VLKSVSMASLACISIDRYIAITKPLTYN--TLVTPWRLRLCIFLIWLYSTL  
VFLPSFF-HWGKPGY-----HGDVFQWCAESWH-----

-----TDSYFTLFIVMMLYAP  
AALIVCFTYFNIFRICQQHTKDISERQARFSSQSGETGEV-----

---QACPKRY-AMVLFRITSVFYILWLPYIIYFLLESST-----GHSNRFASFLTTWL AISNSFCNCVIYSLSNSV FQRGLKRL  
SGAMCTSCASQTTANDPYTVRSKGPLNGCHI-----

-----</seq-data>

</sequence>

<sequence seq-type="Protein">

<seq-name>gprj\_human</seq-name>

<seq-info><length>1066</length></seq-info>

<seq-data>-----

-----MVFAHRMDNSKPHLII  
PTLLVPLQNR SCTETATPLPSQYLMELSEH SWMSNQTDLHYVLK---PGEVATASIFFGILWLFSIFGNSLVCLVIHRSRRTQ  
S---TTNYFVVS MACADLLISVASTPFVLLQFTTG--RWTLGSA-----TCKVVRYFQYLTPGVQIYVLLSICIDRFYTIVYPLSF----  
KVSREKAKKMIAASWIFDAGFVTPV LFFYGSN-----WDSHCNYFLP-----

-----SS  
WEGTAYTVIHFLVGVFVPSVL IILFYQKVIKIYIWRIGTDGRTVRR TMN-----

-----IVPRTKVKT-IKMFLILNLLFLLSWLPFHVAQLWHPHE-----QD-YKKSSLVFTAITWISFSSSASKPTL  
YSIYNANFRRGMKETFCMSSMKCYRSNAYTITSSRMAKKNYVGISEIPSMAKTITKDSIYDSFDREAKEKKLAWPINSNPP  
NTFV-----</seq-data>

</sequence>

<sequence seq-type="Protein">

<seq-name>acm2\_human</seq-name>

<seq-info><length>1066</length></seq-info>

<seq-data>-----

-----MNNSTNSSNNSLALTSPYK---TFEVVFIVLVAGSLSLVTIIGNILVMVSIKVNRLQT---VNNYFLFSLACADLIIGV  
FSMNLTYLTVIG--YWPLGPV-----VCDLWLALDYVVSNASVMNLLIISFDRYFCVTKPLTYP--VKRTTKMAGMMIAAAW  
VLSFILWAPAIL-FWQFIVG-----VRTVEDGECYIQFFS-----

-----NAAVTFGTAAIAAF  
YLPVIIMTVLYWHISRASKSRIKKDKKEPVANQDPVSPSLVQGRIVKPNNNMPSSDDGLEHNKIQNGKAPRDPVTENCV  
QGEEKESSNDSTSVSAVASNMRDDEITQDENTVSTSLGHSKDENSQKTCIRIGTKTPKSDSCTPTNTTVEVVGSSGQNGDE  
KQNIVARKIVKMTKQP-----AKKKPPPSREKKV-TRTILAI  
LLAFIITWAPYNVMVLINTFC-----APC---IPNTVWTIGYWLCYINSTINPACYALCNATFKKTFKHLLMCHYKNIGATR-----

-</seq-data>

</sequence>

<sequence seq-type="Protein">

<seq-name>5ht\_lymst</seq-name>

<seq-info><length>1066</length></seq-info>

<seq-data>-----

-----MANFTFGDLALDVARMGGLASTPSGLRSTGLT  
TPGLSPTGLVTSDFNDSYGLTGQFINGSHSSRSRDNASANDTSATNMTDDRYWSLTVYS--HEHLVLTSVILGLFVLCIIGN  
CFVIAAVMLERSLHN---VANYLILSLAVADLMVAVLVMPLSVVSEISK--VWFLHSE-----VCDMWISVDVLCCTASILHLVAI  
AMDRIYWA VTS-IDYI--RRRSARRILLMIMVVWIVALFISIPPLF-GWRDPNN-----D  
PDKTGTCIISQD-----

-----KGYTIFSTVGAFYLPMLVMMIYIRIWLVARSRIRKDKFQMTKARLKTEETTLVASPKTEYSV  
SDCNGCNSPDSTTEKKRRAPFKSYGCSPRPERKKNRAKLPENANGVNSNSSSSERLKQIQIETAFAFANGCAEEASIAML  
ERQCNGGKISSNDT-----PYSRTRE  
KLELKRERKA-ARTLAIITGAFLICWLPFFIHALIGPFV-----DPE--GIPPFARSFVLWLG YFN SLLNPIIYTIFSP EFRSAFQKILF  
GKYRRGHR-----

-----</seq-data>

</sequence>

<sequence seq-type="Protein">

<seq-name>o76267</seq-name>

<seq-info><length>1066</length></seq-info>

<seq-data>-----

-----MSWHNISVQRMGRNASLLEAN  
MYAMFPGYNITTGWPPRDNNSNNSGYFDQVTVNGSDRPELLRQYNYHEPKYE--EPVMIVICIFLGCMILAILGNIFVITAI  
LVEKSLQG---VSNYLILSLAVTDLLVAVLVMPLSLIYEISI--HWFLGNA-----VCDMWVSMVLCCTASILHLVAIAFDRIYWA  
VSN-IDYV--RSRNARQILLMVAIVWTVSVFISISPLF-GWRHD-----SDDPELTGQCL  
ISQDH-----

-----GYTVFSTVGRFYCPLLLMLVINFKIYRAARYRIRKKRFGGRGGKHQALHVPLPAVTVDTSHRQILATLEG  
DVSQDGISMYMPSCTNAMTSTRVEHGETARCPGEWSTRRPAGSKPDSHVQHTDRPSMHLLASPYPVQEPRSRFQQQ  
RHQKTE-----THRQRVVFREKRM  
EMARERKVVLRVLGIITGAFVVCWLPFFVAVVKPMC-----GTPC--DMPSYVYSLFLWLGYVNSLINPIIYTIFNPSFRCAF  
NKIFLRRIKSVNRIT-----

-----</seq-data>

</sequence>

<sequence seq-type="Protein">

<seq-name>5ht\_bommo</seq-name>

<seq-info><length>1066</length></seq-info>

<seq-data>-----MEGAEGQEELDWE  
ALYLRLPLQNCSWNSTGWEPNWNVTVPNTTWWQASAPFDTPAA---LVRAAAKAVVLGLLILATVVGNVFVIAAILLER  
HLRS---AANNLILSLAVADLLVACLVMPLGAVYEVVQ--RWTLGPE-----LCDMWTSGDVLCTASILHLVAIALDRYWAVT  
N-IDYI--HASTAKRVGMMIACVWTVSFFVCIAQLL-GWKDPDW-----NQRVSEDLR  
CVVSQD-----

-----VGYQIFATASSFYVPVLIILILYWRIYQTARKRIRRRRGATARGGVGPPVPAGGALVAGGGSSGIAA  
AVVAVIGRPLPTISETTTTGFTNVSSNNTSPEKQSCANGLEADPPTTGYGAVAAAYPSL-----

-----VRRKPKEAADSKRERKA-AKTLAIIT  
GAFVACWLPFFVLAILVPTC-----DC--EVSPVLTSLSLWLGYFNSTLNPVIYTVFSPEFRHAFQRLLCGRRVRRRRAPQ-----

</seq-data>

</sequence>

<sequence seq-type="Protein">

<seq-name>5ht\_helvi</seq-name>

<seq-info><length>1066</length></seq-info>

<seq-data>-----MNASRLPGFNDTSQ  
DQPYPTSSEWFDGSNCSWVDAVSWGCNVTINGTSTNATSTDVTS---FVLMAVTSVVLALILATIVGNVFIAAIIERNLQ  
N---VANYLVASLAVADLMVACLVMPLGAVYEVVQ--GWILGPE-----LCDMWTSSDVLCSASILHLVAIATDRYWAVTD-  
VDYI--HIRNEKRIFTMIVLVWGAALVSLAPQL-GWKDPDY-----LARITQQQKCLVS  
QD-----

-----LAYQIFATMSTFYVPLAVILILYWKIFQTARRRIRRRRDPPPPRPTSADGATPSGRPVQSARDRRFVKKRFLN  
LKKCNQRTRAETLAAALLTEGQSTSTVDTLDEEPRTTAFTINEKVPPSVSPEKSSSTVTNGSKPERAIVPAP-----

-----THREKESLEAKRERKA-AKTLAIIT  
GAFVFCWLPFFIMALVMPIC-----QTC--VISDYLASFFLWLGYFNSTLNPVIYTI FSPDFRQAFARILFGTHRRRRYKKF-----

</seq-data>

</sequence>

<sequence seq-type="Protein">

<seq-name>o18512</seq-name>

<seq-info><length>1066</length></seq-info>

<seq-data>-----MIDETLLNL  
TASPSSQPATLLSAVARGTHLVDQFPAHAEIFSDIERP---LVQTVILASVLLVLILSCFIGNLFVILAIIMERDLRGR--PQYYLIFS

LAVADLLVGMIVTPLGAWFTVTG--TWNLGVV-----VCDFWISVDVLVCTASILHLVAIALDRYWSITD-ICYV--QNRTPKRI  
TLMLAVIWFTSLLISLAPFA-GWKDEGF-----SDRVLKSHVCLISQQ-----  
-----ISYQ  
VFSTATAFYIPLIAICVYWKIMRAAKKRFKRERDRRTVIRPPDAIDEKKAMMPKKSCKPLPPAVVISDIQANGGTGGKTN  
SIKNPPRHNESSSSASEEERTMTQTNHAPGDVTTQETKIDEENGRSKPGIVK-----  
-----RRRRTKESNEMKRERKA-WRTLAIITGTFVACWTPFFLV  
SIYRPIC-----GC--QISPVLEQVTLWLGYLNSALNPIIYTVFSQDFRAAFKRIIKRMCLIHDY-----  
-----</seq-data>

</sequence>

<sequence seq-type="Protein">

<seq-name>d2d1\_xenla</seq-name>

<seq-info><length>1066</length></seq-info>

<seq-data>

-MDPQNLSMYNDDI----NNGTNGTAVDQ----KPHYNYAMLLTLLVFVIVFGNVLVCIASVREKALQT---TTNYLIVSLAV  
ADLLVATLVMPWAVYMEVVG--EWRFSRI-----HCDIFVTLVMMCTASILNLCAISIDRYTAVAMPMLYN-TRYSSKRRVT  
VMISVWVLSFAISCPLLF-GLNNTG-----SKVCIIDNP-----  
-----AFVIYSSIV  
SFYVPFIVTLLVYVQIYIVLRKRRKRVNTRKNSRGV-----AVDAHDKCTHPEDVKLCSVFKSNGSFPADKKKVVILVQEAGK  
HPEDMEMEMMSSTS-----PPEKTKHKS--ASPDHNQLAVPATSNQCKNASLTSPVESPYKAEKNGHPKDSTKPAKVFEIQS  
MP-----NGKTRTSIKTMSKKLSQHKEKKA-TQMLAIVLG  
VFIICWLPFFIHHILNMHC-----NC--NIPQALYSAFTWLGYN SAVNPIIYTTFNVEFRKAFIKILHC-----  
-----</seq-da

ta>

</sequence>

<sequence seq-type="Protein">

<seq-name>d2dr\_human</seq-name>

<seq-info><length>1066</length></seq-info>

<seq-data>

-MDPLNLSWYDDDLERQNWSRPFNGSDGKAD----RPHYNYATLLTLLIAVIVFGNVLVCMASVREKALQT---TTNYLIVSL  
AVADLLVATLVMPWVYVLEVVG--EWFKSRI-----HCDIFVTLVMMCTASILNLCAISIDRYTAVAMPMLYN-TRYSSKRR  
VTVMISIVWVLSFTISCPPLLF-GLNNAD-----QNECIANP-----  
-----AFVVYS  
SIVSFYVPFIVTLLVYIKIYIVLRRRRKRVNTRKSSRAF---RAHLRAPLKGNCTHPEDMKLCTVIMKSNGSFPVNRVV---EAA  
RRAQELEMELMSSTS-----PPERTRYSP--IPPSHHQLTLPDPS---HHGLHSTPDSPAKPEKNGHAKDHPKIAKIFEIQTMP--  
-----NGKTRTSLKMSRRKLSQQKEKKA-TQMLAIVLGVFIIC  
WLPFFITHILNIHC-----DC--NIPVLYSAFTWLGYN SAVNPIIYTTFNIEFRKAFILHC-----  
-----</seq-data>

</sequence>

<sequence seq-type="Protein">

<seq-name>d2dr\_fugru</seq-name>

<seq-info><length>1066</length></seq-info>

<seq-data>



-MDVFTQYAYNDSI-FDNGTWSANETTKDE-----THPYNYAMLLTLLIFVIVFGNVLVCMASREKALQT---TTNYLIVSLAV  
ADLLVATLVMPPWVVYLEVVG--EWRFSKI-----HCDIFVTLDVMMCTASILNLCAISIDRYTAVAMPMLYN-TRYSSRRRV  
VMISVVWVLSFAISCPLLF-GLNNTA-----TRDQSLCFIANP-----  
-----AFVVYS  
SIVSFYVPIVITLLVYVQIYVVLKRRKRKRVNTKPKQRLCQAADPDIPSTLKDCKCTHPEDVRLCTMIVKSNQSFVNVKVKVIFIKD  
GVNEVEGLELDELNYCGGSHKQPPPPQQPRALGDTPATSHQLLMSTKANASPTSTPPTPEEGQRTEKNGDPTKEAQ-G  
NPAPVVALR-----NGKTQTSKTLKSKRKISQQKEKKA-TQ  
MLAIVLGVFIICWLPFFITHILNTHC-----TRC--KVPAEMYNAFTWLGYN SAVNPIIYTTFNVEFRKAFIKILHC-----  
-----

--</seq-data>

</sequence>

<sequence seq-type="Protein">

<seq-name>5h6\_human</seq-name>

<seq-info><length>1066</length></seq-info>

<seq-data>-----

-----MVPEPGPTANSTPAWGAGPPSA---PGGSGWVAAALCVVIALTAAANSLIALICTQPALRN---TSNFFLVSLFTSD  
LMVGLVVMPPAMLNALYG--RWVLARG-----LCLLWTAFDVMCCSASILNLCLISLDRYLLILSPLRYK--LRMTPLRALALVL  
GAWSLAALASFLPLLLGWHELGHA-----RPPVPGQCRLASL-----  
-----PFVLVAS  
GLTFFLPSGAICFTYCRILLAARKQAVQVASLTTGMASQASETQVPRTPRPGVE-----  
-----

-----SADSRRLATKHSRKALKA-SLTGILLGMFFVTWLPFFVANIVQAVC-----DC---ISPGLFDVLTWLGVCNSTMN  
PIIYPLFMRDFKRALGRFLP-CPRCPRERQASLASPLRSTSHSGPRPGLSLQVPLPLPPDSDSDSDAGSGGSSGLRLTAQLL  
LPGEATQDPPLPTRA AAAVNFFNIDPAEPELRPHPLGIPTN-----</seq-data>

</sequence>

<sequence seq-type="Protein">

<seq-name>aa2a\_human</seq-name>

<seq-info><length>1066</length></seq-info>

<seq-data>-----

-----MP-----IMGSSVYITVELAIAVLAILGNVLVCWAVWLNSNLQN---VTNYFVVS LAAADI AVGVLAIP  
FAITISTG---FCAACH-----GCLFIACFVLVLTQSSIFSLAIAIDRYIAIRIPLRYN--GLVTGTRAKGIIAICWVLSFAIGLTPML-G  
WNNCGQPKEGKNHSQG-----CGEGQVAQLFEDVV-----  
-----PMNYMVYFNFFACVLVPLL  
LMLGVYLRIFLAARRQLKQMESQPLPGERAR-----  
-----

-----ST  
LQKEVHA-AKSLAIIVGLFALCWLP LHIINCFTFFC-----PDC-SHAPLWLMYLAIVLSHTNSV VNPFIYAYRIREFRQTFRKIIR  
SHVLRQQEPFKAAGTSARVLA AHGSDGEQVSLRLNGHPPGVWANGSAPHPERRPNGYALGLVSGGSAQESQGNTGLPD  
VELLSHELKGVCPPEPGLDDPLAQDGAGVS-----</seq-data>

</sequence>

<sequence seq-type="Protein">

<seq-name>aa1r\_human</seq-name>

<seq-info><length>1066</length></seq-info>

<seq-data>-----  
-----MPP--SI----SAFQAAYIGIEVLIALVSVPGNVLVIWAVKVNQALRD---ATFCFIVSLAVADVAVGALVIP  
LAILINIG---PQTYFH-----TCLMVACPVLILTQSSILALLAIAVDRLRVKIPLRYK--MVVTPRRAAVAIAGCWILSFVVGLTP  
MF-GWNNLSAVERAWAANGS-----MGEPVIKCEFEKVI-----  
-----SMEYMVYFNFFVWVL  
PPLLLMVLIIYLEVLYLRKQLNKKVSASSGDPQ-----  
-----K  
YYGKELKI-AKSLALILFLFALSWLPLHILNCITLFC-----PSC--HKPSILTYIAIFLTHGNSAMNPVIYAFRIQKFRVTFLKIWND  
HFRCQPAPPIDEDLPEERPDD-----  
-----</seq-data>

</sequence>

<sequence seq-type="Protein">

<seq-name>o17496</seq-name>

<seq-info><length>1066</length></seq-info>

<seq-data>-----  
-----MSEWQFTHVRVPVATR----QTSNVLALLLPLLCVGLLGNLLVCMAIWFDRLHN---VTNYFLFSLALADLF  
VCSIVMPLSLLVEVRH-GVWTWSFS-----VCLLYVYADVFLCTASIVHMSMISLDRFLGISRPLKI---RNRSRTMTTLKITFVW  
LITILISCPAIAALIDPT-----NILQR-NSCAISNR-----  
-----YYMVYGSTFAFLIPFIV  
MAVITYTKTTLLKKQASQLSQRASNRSNGLRRTLPHRRLGQSSMSNGMLHKNSVNIGGYSSLRGTHPPLLIEDELQLTALP  
SDSKNKEERGKLRRIARTSSAIFAV-----  
-----TSRISRKSSLLITSQDLANEHKA-TRVLAVVFGCFFVCWTPFFAANFAVGFC-----GESC--A  
VPPGIASLFLWLGYVSSSTINPLIYTIFNRRFRQAFLRIIRCQCLRPWRELSMDSRNYTYYPGDTYTWSNVERTAKMGGVC  
KFGEYWSNVSCRSRNEFVLTDRRQLDNVKTTSERPLLCGKHCNSSSGNSLQNSARDQHDDISLNTLPANHSKYTDNDN  
KYLTINERLAALC-----</seq-data>

</sequence>

<sequence seq-type="Protein">

<seq-name>5h2c\_human</seq-name>

<seq-info><length>1066</length></seq-info>

<seq-data>-----MVNLRNAVH  
SFLVHLIGLLVWQCDISVSPVAAIVTDIFNTSDGGRFKFP----DGVQNWPAISIVIIIIMTIGGNILVIMAVSMEKKLHN---AT  
NYFLMSLAIADMLVGLLVMPLSLLAILYD-YVWPLPRY-----LCPVWISLDVLFSTASIMHLCAISLDRYVAIRNPIEH--SRFNS  
RTKAIMKIAIVWAISIGVSVPIPVIGLRDEE-----KVFVNNTTCVLNDP-----  
-----N  
FVLIGSFVAFFIPLTIMVITYCLTIYVLRQALMLLHGHTTEPPGLSLDFLKCKKRNTAEEENSANPNQDQNARRRK-----  
-----  
-----KKERRPRGTMQAINNERKA-SKVLGIVFFVFLIMWCPFFITNILSVLC-----EKSCNQKLMKLL  
NVFVWIGYVCSGINPLVYTLFNKIYRRAFSNYLRCNYK-----VEKPPVRQIP  
RVAATALS GRELVNIYRHTNEPVIEKASDNEPGIEMQ--VENLELPVNPSSVVSERISSV-----</seq-data>

>

</sequence>

<sequence seq-type="Protein">

<seq-name>5h2a\_human</seq-name>  
<seq-info><length>1066</length></seq-info>  
<seq-data>-----MDILCEENTSLSSTNSLMQLN  
DDTRLYSNDFNSGEANTSDAFNWTVDSENRTNLSCEGCLSPSCLSLH----LQEKNEWSALLTAVVILTIAGNILVIMAVSLEK  
KLQN---ATNYFLMSLAIADMLLGLVMPVSMILTILYG-YRWPLPSK-----LCAVWIYLDVLFSTASIMHLCAISLDRYVAIQN  
PIHH--SRFNSRTKAFLKIIAVWTISVGISMPIPVFGLQDDS-----KVFKE-GSCLLADD  
-----  
-----NFVLI GSFVSFFIPLTIMVITYFLT IKSLQKEATLCVSDLGTRAKLASFSFLPQSSLSSEKLFQRSIHRE-----  
-----  
-----PGSYTGRRTMQSISNEQKA-CKVLGIVFFLVVMWCPFFITNIMAVIC-----KESCNE D VIG  
ALLNVFVWIGYLSSAVNPLVYTLFNKTYRSAFSRYIQ CQYK-----ENKKP-LQL  
ILVNTIPALAYKSSQLQM GQK KNSKQDAKTTDNDCSMVALGKQHSEEASKDNSDGVNEKVSCV-----</s  
eq-data>

</sequence>  
<sequence seq-type="Protein">  
<seq-name>5ht2\_aplca</seq-name>  
<seq-info><length>1066</length></seq-info>  
<seq-data>-----  
-----MLCGRLRHTMNSTTCFF----SHRTVLIGIVGSLIIVSVVGNVLC LAIFTEPILSHS--KSKFFIVSLAVADLLLALL  
VMTFALVNSLYG--YWLFGET-----FCFIWMSADVMCETASIFSICVISYNRLKQVQKPLQYE--EFMTTTRALLI IASLWICSF  
VVSVFPFFLEWHELMEEIKTIFKDLISDKVKTSDAHTFSFAL-EQTLGDNR-----TSNPKPECLFDVHF-----  
-----IY  
SVIYSLFCFYIPCTLM LRNYLRLFLIAKHHVRIK N LHR LH-----  
-----  
-----RNQGTQGSKA-ARTLTIITGTFLACWLPFFIINPIEAVD-----EHLIPLECFMVTIW LGYFNSCVNP I IYGT S NSKF  
RAAFQRL LRCRSVKSTVSSISPVASVYRAF SWIRPSLLDGP S AVCDT GQDENRKG GGC VTTIPTESHV I ISEEEIRANV MLSE  
SDTVFS-----</seq-data>

</sequence>  
<sequence seq-type="Protein">  
<seq-name>b3ar\_human</seq-name>  
<seq-info><length>1066</length></seq-info>  
<seq-data>-----  
MAPWPHENSSLAPWPDLP TLAPNTANT SGLPGV----PWEAALAGALLALAVLATVGGNLLVIVAIAWTPRLQT---MTNVF  
VTS LAAADLVMGLLVPPAATLALTG--HWPLGAT-----GCELWTSVDVLCVTAS IETL CALAVDRYLAVTNPLRYG--ALVT  
KRCARTAVVLVWVVSAAVSFAPIMSQWWRVGADA-----EAQRCHSNPRCCAFASNM  
-----  
-----PYVLLSSVSFYLP LLVMLFVYARVFV VATRQLRLLRGELGRFPP-EESPPAPSRSLAPAPVGT CAPPEGV-----  
-----  
-----PACGR RPARLLPLREHRA-LCTLGLIMGTFTLCWLPFFLANVLRALG-----GPSLVP  
GPAFLALNWLG YANS AFNPLIY-CRSPDFRS AFRRLLCRCGRRLPPEPCA AARPALFPSGVPAARSSPAQPRLCQRLDGASW  
GVS-----</seq-data>

</sequence>

<sequence seq-type="Protein">  
<seq-name>b1ar\_human</seq-name>  
<seq-info><length>1066</length></seq-info>  
<seq-data>-----MGAGVLVLGASE  
PGLSSAAPLPDGAATAARLLVPASPPASLLPPASESPEPLS---QQWTAGMGLLMALIVLLVAGNVLVIVAIKTPRLQT--  
-LTNLFIMSLASADLVMGLLVVFPFATIVVWG--RWEYGSF-----FCELWTSVDVLCVTASIELCVIALDRYLAITSPFRYQ--S  
LLTRARARGLVCTVWAIASALVSFLPILMHWWRAESD-----EARRCYNDPKCCDFVTNR-  
-----  
-----AYAIASSVVSFYVPLCIMAFVYLRVFREAQKQVKKIDSCERRFLGGPARPPSPSPSPVPAPAPPPGPPRPAAAAA  
TAPLANGR-----  
-----AGKRRPSRLVALREQKA-LKTLGIIMGVFTLCWLPFFLANVVKAHF-----  
-RELVPDRLFVFFNWLGANSANFNPIY-CRSPDFRKAQGLLC-CARRAARRRHATHGDRPRASGCLARPGPPPSGAASD  
DDDDDVVGATPPARLLEPWAGCNGGAAADSDSSLDEPCRPGFASESKV-----  
-----</seq-data>

</sequence>

<sequence seq-type="Protein">  
<seq-name>aa3r\_human</seq-name>  
<seq-info><length>1066</length></seq-info>  
<seq-data>-----  
-----MPNNSTAL---SLANVTYITMEIFIGLCAIVGNVLVICVVKLNPSLQT---TTFYFIVSLALADIAVGVLVMP  
LAIIVSLG---ITIHFY-----SCLFMTCLLLIFTHASIMSLIAVDRYLRVKLTVRYK--RVTTHRRIWALGLCWLVSFLVGLTP  
MF-GWNMMLTSEYH-----RNVTFLSCQFVSVM-----  
-----RMDYMVYFSFLTWIFIPLV  
VMCAIYLDIFYIIRNKLSLNLNSKETG-----  
-----AFYGRE  
FKT-AKSLFLVLFALS WLPLSIINCIYFN-----GEVPQLVLYMGILLSHANSMMNPVYAYKIKKFKETYLLILKACVVC  
HPSDSLDTSIEKNSE-----  
-----</seq-data>

</sequence>

<sequence seq-type="Protein">  
<seq-name>mshr\_human</seq-name>  
<seq-info><length>1066</length></seq-info>  
<seq-data>-----M  
AVQGSQRRLGSLNSTPTAIPQLGLAANQTGAR---CLEVSISDGLFSLGLVSLVENALVVATIANKRNLHS---PMYCFICCL  
ALSDLLVSGTINVLETAVILLE--AGALVARAAVLQQLDNVIDVITCSSMLSSLCFLGAIIVDRYISIFYALRYH--SIVTLPRAPR  
AVAAIWVASVVFSTLFIA-YYDHV-----  
-----AVLLCLVFFFLA  
MLVLMVAVLYVHMLARACQ-----  
-----HAQGIARLHKRQ  
RPVHQGFGLKG-AVTLTILLGIFFLCWGPFFLHLTLIVLC-----PEHPTCGCIFKNFNLFALIICNAIIDPLIYAFHSQELRRTLKE  
VLTCSW-----  
-----</seq-data>

```
</sequence>  
<column-score>  
<colsco-name>coreblock</colsco-name>  
<colsco-owner>0</colsco-owner>  
<colsco-type>int</colsco-type>  
<colsco-data>00000000000000000000000000000000000000000000000000000000000000000000  
000000000000000000000000000000000000000000000000000000000000000000000000000  
00000000000000000000000000000000000000000000000000000000000000000000001111  
11111111111111111111111111111111111111111111111111111111111111111111111111  
100000000000000000000000111111111111111111111111111111111111111111110000000  
00000000011111111111111111111111111111111111111111111111111111111111111111  
00000000000000000000000000000000000000000000000000000000000000000000000000  
00000000000000000000000000000000000000000000000000000000000000000000000000  
00000000000000000000000000000000000000000000000000000000000000000000000000  
00000000000000000000000001111111111111111111111111111111111111111111111111  
00000000000000000000000000000000000000000000000000000000000000000000000000  
00000000000000000000000000000000000000000000000000000000000000000000000000  
00000000000000000000000000000000000000000000000000000000000000000000000000  
00000000000000000000000000000000000000000000000000000000000000000000000000  
00000001111111111111111111111111111111111111111111111111111111111111111111  
11111111111111111111111111111111111111111111111111111111111111111111111111  
00000000000000000000000000000000000000000000000000000000000000000000000000  
00000000000000000000000000000000000000000000000000000000000000000000000000  
00000000000 </colsco-data>
```

</column-score>

</alignment>

</macsim>

::::::::::

Nat\_core-block.xml

::::::::::

<?xml version="1.0"?>  
<!DOCTYPE macsim SYSTEM "http://www-bio3d-igbmc.u-strasbg.fr/macsim.dtd">

<macsim>

<alignment>

<aln-name>1</aln-name>

<sequence seq-type="Protein">

<seq-name>CITT\_ECOLI</seq-name>

<seq-info><length>1375</length></seq-info>

<seq-data>-----  
-----  
-----  
-----MSLAKDNIWKLLAPLVVMGVMFLIPVPDGMP-----PQAWHYFAVFD

AMIVGMILE--PIPATAISFIAVTICVIGSNYLLFDAKELADPAFNAQKQALKWGLAGFSSTTVWLVFGAFIFALGYEVSGGLGR  
RIALFLVKFMGKRTLTLGYAIVIIDILLAPFTPSNTARTGGTVFPVIKNLPLFKSFPNDPSAR-----  
-----RIGGYLMWMMVISTSLSSSMFVTGAAPNVLGLEFVSKIAGIQ---ISW  
LQWFLCFLPVGVILLIIPWLSYVLYKP-----  
-----EITHSEEVATWAGDELKTMG-ALT  
RREWTLIGLVLLSLGLWVFG-----SEVINATAVGLLAVSLMLAL-----HVVPW-KDIT  
RYNSAWNTLVNLATLVVMANGLTRSGFIDWFAGTMSTHLEG---FSPNATVIVLVLVFYFAHYLFASLSAHTATMLPVILAV  
GKGIPGVP-----MEQLCILLVLSIGIMGCLTPYATGPGVVIYCGG-----YVKSVDYWRGAIKFGVIYISMILLVGVWPILA  
MWN-----</seq-data>

</sequence>

<sequence seq-type="Protein">

<seq-name>TTDT\_ECOLI</seq-name>

<seq-info><length>1375</length></seq-info>

<seq-data>-----  
-----  
-----  
-----  
-----

-----MKPSTE-WWRYLAPLAVIAIIALLPVPAGLE-----NHTWLYFAVFTGVI  
VGLILE--PVPGAVVAMVGISIIAILSPWLLFSPEQLAQPGFKFTAKSLSWAVSGFSNSVIWLIFAAFMFGTGYEKTGLGRRIAL  
ILVKKMGHRTLFLGYAVMFSELILAPVTPSNSARGAGIYPIIRNLPLYQSQPNDSRSSR-----  
-----SIGSYIMWMGIVADCVTSIFLTAMAPNLLLIGLMKSASHAT----LSWGD  
WFLGMLPLSILLVLLVPWLAYVLYPP-----

-----VLKSGDQVPRWAETELQAMG-PLC  
SREKRMGLMVGALVLWIFG-----GDYIDAAMVGYSVVALMLLL-----RIISW-DDI  
VSNKAAWNVFFWLASLITLATGLNNTGFISWFGKLLAGSLSG---YSPTMVMVALIVFYLLRYFFASATAYTSALAPMMIA  
AALAMPEIP-----LPVFCLMVGAAIGLSILTPYATGPSPIYYGSG-----YLPTADYWRGAIKFGIIFLVLLVITGLLWM  
PVVLL-----</seq-data>

</sequence>

<sequence seq-type="Protein">

<seq-name>O84207</seq-name>

<seq-info><length>1375</length></seq-info>

<seq-data>-----  
-----  
-----  
-----  
-----

-----MNKHKRFLSLVLLTFILLGIWFPHSDLID-----SKAWHLFAIFTTIIIGII  
VQ--PAPMGAIIVIMGISLLLLVTKTLT-----LDQALSGFHSPITWLVFLSFSIAKGVIKTGLGERVAYFFVKILGKSPGLG  
LSYGLVLTDFLLAPAIPSLTARAGGILFPVVMGLSESGSSVEKGTGK-----  
-----LLGSFLIKVAYQSSVITSAMFLTAMAGNPIISALASH-SGVT----LTWAIWAKTAILPGIISLACM  
PFVLFKLFPP-----

-----QITSCEEAVATAKTRLKEMG-PLNQGERIILLIFSLISLWTFG-  
-----DSIGISATTTTFIGLSLLILT-----NILDWQKDVLSNTTAWETFFWFGALIMMASFL  
SAFGFIHFVGDVIGSVQG---LSWKIGFPIFLIYFYSHYLFASNTAHIAAMYPIFLTVSISLGAN-----PMFAALALAF  
ASNLFGLLTHYGSPPAPLYFGSH-----FVSVQEWWRSGFILSIVNLTIWLGSGSWWWYCLGLIR-----

```
--</seq-data>
</sequence>
<sequence seq-type="Protein">
<seq-name>SOT1_SPIOL</seq-name>
<seq-info><length>1375</length></seq-info>
<seq-data>-----
-----
-----MASMALSLTSSPTYSLSFRLPS
LKPLSKSQPSISLPSLRNASKSPSLSHKHFLSPPSLLLPHKLPISASSPTNPPPPAPVPSPAPVSAPAQVQPWQGASIKPLL
ASILTGVIWFIPTPEGVS-----RNAWQLLAIFLSTIVGIITQ--PLPLGAVALMGLGASVLTKLT-----FSAAFSAF
GDPIPWLIALAFFFARGFIKTGLGNRIAYQFVKLFGSSSLGLGYSLVFSEALLAPAIPSVSARAGGIFLPLVKSLCIACGSNVGD
GTER-----KLGAWLMLTCFQTSVISSMFLT
AMAANPLSATLTFNTIGKA---IGWMDWAKAAFVPGVLVSLIVVPLLLYVVYPP-----
-----
----EIKSSPDAPRLAKEKLDKMG-PMTKNESIMAVTLLLTVGLWVFG-----GKLGVDVAVTAAAILGLSVL
LIT-----GVVTW-KECLAESVAWDTLTWFAALIAMAGYLNKYGLITWFSENVVKVGG-LGLSWQMSFGV
LVLLYFYSHYFFASGAAHIGAMFTAFLSVASALGTP-----PFLAAIVLSFLSNLMGGLTHYGIGSAPVfyGAN-----Y
VPLPQWWGYGFLISIVNLIWLVGGLWWKAIGLW-----</seq-data>
```

```
</sequence>
<sequence seq-type="Protein">
<seq-name>YBHI_ECOLI</seq-name>
<seq-info><length>1375</length></seq-info>
<seq-data>-----
-----
-----MNKKS--WKLILILAIPCIIGFMPAPAGLS-----ELAWVLFGIYLAIVGL
VIK--PFPEPVLLIAVAASMVVVGNLSDG-----AFKTTAVLSGYSSGTTWLVFSAFTLSAAFVTTGLGKRIAYLLIGKIGN
TTLGLGYVTVFLDLVLAPATPSNTARAGGIVLPIINSVAVALGSEP-EKSPR-----
-----RVGHYLMMSIYMVTKTTSYMFFTAMAGNILALKMINDILHLQ----ISWGGWALAAGL
PGIIMLLVTPLVYTMYP-----
-----EIKKVDNKTIKAGLAELG-PMKIREKMLLGVF
VLALLGWIFS-----KSLGVDESTVAIVVMATMLL-----GIVTW-EDVVKNKGGWNT
LIWYGGIIGLSSLLSKVFFEWLAEVFKNNLAF--DGHGNVAFFVIIFLSIIVRYFFASGSAYIVAMLPLVFAMLANVSGAP-----
-----LMLTALALLFSNSYGGMVTHYGGGAAGPVIFGVG-----YNDIKSWWLVGAVLTILTFLVHITLGVWWWNMLIGW
NML-----</seq-data>
```

```
</sequence>
<sequence seq-type="Protein">
<seq-name>YBHI_HAEIN</seq-name>
<seq-info><length>1375</length></seq-info>
<seq-data>-----
-----
-----
```

-----MALSKN--TKLVILMAIPLITFLLPAPDGLS-----LIAWRLLGVYIATIVGL  
VLK--PYGEPVILLAAIAVSGVIIIGNTEGA-----KELVKVGNMLDGYKSGTTWLIFTAFTLSSAFVITGLGKRIAYHMIGAM  
GSTTLRLGYVTMFLDLLSPATPSNTARSGGIIFPIINSVVVALGSDP-EKSPK-----  
-----KAGRYLMMNVYVMVVKTTSYIFLTAMAPNALALSMLAPILGFE----TTWIKWFLAASV  
PGLLCLFLIPLICYWVSP-----  
-----ELKKVDNKAIKKGLEELG-PMSFREKALSVLV  
IALFGWIFS-----NSLHINATIVAIIVMVLICVL-----SIVTW-DDILKSKGAWNTLVWY  
GGIIGMSGLEKSGFFKWLANTLSTILQF--EGHGMMALIVILTLSVSVRYLFASGGAYVAAMVPVFATVGHVGTGAP-----  
-----TELLALGLVFANSYGGSVTHYGGGPGPIAFGAG-----YNDIKSWWITGAIIFGSLIHLTIGMAWWKLLMSLGWL---

-----</seq-data>  
</sequence>  
<sequence seq-type="Protein">  
<seq-name>MEMP\_ALCEU</seq-name>  
<seq-info><length>1375</length></seq-info>  
<seq-data>-----

-----MTDTSASPPSAPSAPSAPSAAAAQAVVPAPKLTLHWGLFAAVAALLVVLAIPQPEGLT-----VA  
GQRMLAILAFAIVLWITE--AVSYETSAIMITSLMAGLIGFAPT---NDPSVQYGTSKALGMALAGFSNTALALVAAALFISAA  
MTVTGLDRRIALVTLAIGTSTRILIGTIAVTIALSLVVP SATARSAC-VVPIIMMGVIAAFGVDKKS-----  
-----NIAAGIMITVAQATSIWNVGIQTAAAQNLLTVGFMDKLLG  
ER---ITWLQWLIAGA-PWAIAMSVVLYFLVRLLLP-----  
-----AETDAIP-GGKEAVQRE  
LSALG-PMSAPQKRLAAVSLGLLLFWATE-----GKLHSFDTATVTFVGLVILMMPRI-----  
GVMDW-KTMQQ-RTPWGTLIVFGVIGISLGTALLSTNAGQWLQGFVVTHSGLAA-HGALLVFAILSAFLILHLGFASATALT  
AALLPILIAVLQTLPGDI-----NRVGMTMLLGFVTSFGFILPINAPQNMVCLGTE-----TFNGRQFARIGIPVTIIGYA  
MMLLFAATYWRWLGWV-----</seq-data>

</sequence>  
<sequence seq-type="Protein">  
<seq-name>Q9Z6C0</seq-name>  
<seq-info><length>1375</length></seq-info>  
<seq-data>-----

-----MSLWLTYPLLLPSLIVGVTIVLWATS--LLPEF  
ITALLFFTAAMTARIAP-----PEVIFGGFASSAFWLVSFGFVLGVAIKRTGLADRAARALS AKLTDSWVLMVASV  
LLSYALAFVMPSNMGR-IALLMPIVAAMAKRAGIADGS-----  
-----RAWFGLALAVGFGTFQLSATILPANV PNLVMSGAAEGSYGI----HLNYVPYLLLHTPVLGILKGLILIGLI  
CWLFP-----  
-----GSPKPPKEQAPSD-PMGRDEKRLAWLLAVVLGMWVTE----  
-----SWHGVGPAWTGLAASIVVMLPRV-----GFITG-EEFSA-GVNMRTCIYVAGILGLAIV  
VTQTGIGTAVGEALLRIM-----PLDADRPFTSFLALTGITTALNFIMTANGVPALYTTLAQSFSDATG-----FPLLSVIM



IQVLGYSTPLLPYQASPIVVAMGLG-----KVPARAGMVLCLALAIATYLILLPLDYLWFSLLGKV-----  
</seq-data>  
</sequence>  
<sequence seq-type="Protein">  
<seq-name>O59712</seq-name>  
<seq-info><length>1375</length></seq-info>  
<seq-data>MKFSHSLQFNAVPEWSESYIAYSNLKLIYSLEHEQITLQQGAPDEETRLEHERRSPDDRFRMFALDKELQGI--  
-----VEFYAPKEKEIADQYGRIKGEFETYENEYMSQGNINYPPTPERLQKSSASRKSGRMARS  
QELPRITSSNREIYLNQQTSDGGYAAPASRAESTAIQPSEPHDVDTSKNGLSKKQHSEAQPEVQGNDEVEEEDDDDDDE  
DEDEDEDEDNNNNNRWLLIEQYPSDIVAYENFVSLKRKLTQLYVSIHDLISYVHLNNTYGFSGKILKKY----DKTLGSSLRESYMK  
RVNQAYPFLPATGKTLKRLNIVAWEYAKLCCQGDTFVAIRRLRGLREYVAWERNTIWREMMAMER-----  
----RTQAARL-SGLKPVAADEKESEQPPYFTIKTKFGVFRIPRCFFNSTIATLITIIVIFILLLSFPVIDN-----REQNNCLALLVM  
VSLLWATE--AIPLFVTSFLVPFMTVFLKILRDEN-----GSPLSGKESTKVIFSSMWNPTIVLLLGGFTIAAALSKYHIAKRLATSI  
LAHAGRKPRSVLLTNMFVAMFASMWI-SNVA-APVLCFSIIQPLLRNLPAESD-----  
-----FAKILIVGIALASNVGGIASPISSPQNIVALQNMDPA-----AGWGEWFAVSI-  
PVSLLCIFSIWFLLSFGLL-----  
-----KDEHITLAKIRSTKDTFTGVQWFISIVTIGTIV  
LWCLERRF-----DEVFGDMGVIALVPIIVFFGT-----GLLTK-EDFN--NFLWTVIVLAMG  
GVALGKVSSSGLLELIALKIGNAVSS----LNTFRVLLIFSALTLVVSSFISHIVAAMVVLPIVHEVGSRLADP-----HPR  
LFVLASGMMCSLAMALPTSGFPNMTAIMME-----NEAGKRYLKVSDFLKAGIPATLISFVILLIGTPIMRALGF-----  
-----</seq-data>  
</sequence>  
<sequence seq-type="Protein">  
<seq-name>YN86\_YEAST</seq-name>  
<seq-info><length>1375</length></seq-info>  
<seq-data>MKFSHSLQFNSVPEWSTKYLAISQLKLIYSLQKDKLYSNNKHHVVEPHDANDENLPLLADASPDDQFYISKF-  
-----VAALNQLKKIDKFYISQETGLIANYNELKDDVMELENTNKATQLFNQQQQHQLQSVARNRKSQSQQRQ  
RRFSSVSSTDSNPSTLDMSIDAPVIHTQVSNTTNGNSMQNLASASVSL-----SNSNPVYLSPTQHRLS  
LKKRLISYITQLSELKDFIELNQTGFSKICKKFDKSLNTNLKQNYLNYIKFHSHVFNPATINRIQHHTITELTYASLNKGTRRPSN  
TFNLADADRINNDENSSGNEEDEDGNRQEVLDFQDAERELSSHLRDHVWVERNTVWKDMMNLERKYQSAKTDNKKFSK  
LSSQLRPNANITESMAMSSGGAGIAPSTDSLTFRELMHLPKQWLQFIMGQTSLLKFLITSCFIALLTFNLTPFTQD-----  
SLQKNCFAILIYASLLWATE--TIPLFVTSLMIPLLVFPVIKDPI-----TSQPMSPRDSSQFILSTMWSSVIMLLLGGFTLAAALS  
KYNIAKVLSTHILASAGTNPHFILLTNMFVALFVSMWV-SNVA-APVLCYSIVQPLLRLPRNCS-----  
-----YAKALILGIALASNIGGMSSPIASPQNIFSIGIMDPS-----PS  
WAEWFMIAL-PVCFICVMAIWVLLIITFP-----  
-----PEPNVKILQLHPSRDPFTLK  
QWFVTLVCIITIVLWCLSNQI-----SGIFGEMGIISIIPIVFFGT-----GLLTS-DDFN--NF  
MWTIVVLAMGGTTLGKAVSSSGLLSTMAQLIKAQVEH----EPIFIIVLIFGLVILVMATFVSHVAAMIIVPLMSEIGSNLPSG  
D-----HSRLLIVIAALLCSSAMGLPTSGFPNVTAISMI-----DEVGDRYLVGTFITRGVPASLLSYAAIIVTVGYGILKV  
MGF-----</seq-data>  
</sequence>  
<sequence seq-type="Protein">

<seq-name>YJT8\_YEAST</seq-name>  
<seq-info><length>1375</length></seq-info>  
<seq-data>MRFSHFLKYNAVPEWQNHYMDYSELKNLIYTLQTDELQVGDNEEGFGAGKSSNITDRFKNKFSFKNAKEDTS  
S-----GMNKDAGIVEETIELRELPTAQTVAAKPSPFRRMKEKIFYKRRSSSASSVSSTANENLQLDITYDFTVGD  
L TAEKQKVDDFYKRTEAKFYDKFDALVKDLKIGVIEYDIDDDTLFNEPI-----ASTNDEVPPDLDDDEDD  
EFYDDQSNIEDNTALLHHSQYNIKSQKKSLLKKSIVNLYIDLCLQKSFIELNRIGFAKITKKSDDKVLHLNTRTELIESEQFFKDTYA  
FQAETIELLSKISQLVTFYARITDRPHNISHSKQELKSYLHDHIVWERSNTWKDMLGLLS-----QADELTPKETEY  
NANKLVGKLDLEYYRWPLPRPINLKFTSINNALPKLFFTKKAYKIYFIILVTGLLGKTFND-----AAQHRCMALVECVAF  
L WASE--AIPLHITAFVPLLVVLFKVLKTS-----GAIMSAASASSEILAAMWSSTIMILLAGFTLGEVLAQYNIKVLASWLLA  
FAGCKPRNVLLMAMCVVFFLSMWI-SNVA-APVLTYSLLSPLLDAMDADSP-----  
-----FAQALVLGVALAANIGGMSSPISSPQNIISMSYLKPYG-----IGWGQFFAVAL-  
PSGILAMLLVWILLFTTFK-----  
-----MNKTKLEKFKPIKFTVKQYYIITVTVATI  
LLWCVESQI-----EGAFGSSGQIAIPIVLFVFGT-----GLLST-QDLN--AFPWSIVILAMGGI  
ALGKAVSSSGLLSTIAKALQKKIEN---DGVFAILCIFGILMLVVGTFVSHTVSAIIIIPLVQEVGDKLGNPK-----AAPIL  
VFGCALLSSCGMGLASSGFPNVTASKV-----DRKGDRLYSVMTFLTRGVPASILAFLCVITLGYGIMASVVKGNATSA-----  
-----</seq-data>

</sequence>

<sequence seq-type="Protein">

<seq-name>PH87\_YEAST</seq-name>

<seq-info><length>1375</length></seq-info>

<seq-data>MRFSHFLKYNAVPEWQNHLYDYNELKNLIYTLQTDELKQETPTGDLNDDADSQTGPIADIESNIAAGEPSPS  
KRRFTHKLKRKLFSGSKTSGSKRGDSDEKAIDGNNINEETIELDELSPQGKTTSFNKNFIRKFFESRSSVSSEGKTLFSSYDTF  
VTNLSDEKLVDDFYKRMEAKFYERFDHLINDLEKEGIVTRLNETFNPEIQALPPLREIISGTSETHSSNNPFEIHSSNIDSELR  
NRFDYSEEEMDEDDDDVDVFADTTDNTALLNYSQFNISQKKSLLKQTIINLYIDLCLQKSFIELNRMGFSKITKKSDDKVLHMM  
TRQELIESEEFFKDTYIFQHETLSSLNSKIAQLIEFYAVLMGQPGNVDSCKQELKSYLHDHIVWERSNTWKDMLGLSS-----  
-----QNNDIITIEDEAEKL-MQEKLQIEYFKYPLPKPINLKFTKIENLAVPKLFFGKRAMKIGFIIIVTGVLGKTFND-----  
PVEHRCMALVECCAFWASE--AIPLHITGLLVPLLVFRVLKDDD-----GKVMGAAAASTEILGTMWSSTIMILLAGFTLG  
EALSQYNVAKVLASWLLALAGTKPRNVLLMAMSVVFFLSMWI-SNVA-SPVLTYSLLTPLLDPDYTSP-----  
-----FAKALVMGVALSADIGGMASPISSPQNIISMQLKPY  
G-----IGWGQFFAVAL-PTGILSMLCSWALMILTFK-----  
-----IGKTKLEKFKPI  
RTRFTIKQYFIIIVTIATILLWCVESQI-----ESAFGSSGEIAVIPIVLFVFGT-----GLLST-KDF  
N--TFPWSIVVLAMGGIALGKAVSSSGLLVTIARALQKKIQN---DGVFAILCIFGILMLVVGTFVSHTVSAIIIIPLVQEVGDKLS  
DPK-----AAPILVFGCALLASCGMGLASSGFPNVTASMT-----DKKGNRWLVGAFISRGVPASLLAFVCVITLGYG  
ISSSVLKGST-----</seq-data>

</sequence>

<sequence seq-type="Protein">

<seq-name>Q9S4F3</seq-name>

<seq-info><length>1375</length></seq-info>

<seq-data>-----  
-----

-----MKRNLISIVLTLTVGILFLIQVRFGLP-----INIAIMNCIFVLA AVFWV  
LE--PIPGYATSILVIFLEIIFANPIGV---SYFEFPRNKNPSTAVFLSSLADSSIVFLGGFVLAKACVKTGLDRFFANRIIRRFQVK  
SHQVLLGFMFTTGFISMWM-SNTA-TTSMMIALSFPMLQMLPEKEP-----  
-----FRKALILGIPFAANIGGVGTPIGSPPNIIAMGILRQEGI----VVSFGTWMFFAV-PLVIV  
LILFAWLLLMKLF-----  
-----QKDLELVVEFQEPEG-TKSFSFRITTAIFFGTVLLW  
FTE-----NLHGIPAGVVALLPLILFPVF-----GILNE-KDIN--SLDWSVLLLIAGGIGIGV  
FQQSGMKFWFSEFLKPIKP---EYSVSVLFLCVLALLSTFMSNTAATNLLVPFAFPLSTIVLPESNV-----YLLEVCLGI  
ALSASLAMS LVPSTPPNAIAYSVG-----GFEIKDMIQAGLP IGLLILVLAGYFIFL-----</seq-  
data>

</sequence>

<sequence seq-type="Protein">

<seq-name>Q9ZGJ3</seq-name>

<seq-info><length>1375</length></seq-info>

<seq-data>-----  
-----  
-----

-----MKRDLILIIGTLLLIGILFFVQVLFEFP-----LSVAIMICIFVLA AVFWVA  
E--PIPGYATLILVIFLEIIFANPIGI---PGFVFPQKNPNSAAVFLSSLADSSIILFLGGFVLAKACVKTGLDRFFANRIIRKFGVKS  
HQVLLGFMFTTGFISMWM-SNTA-TTSMMIALSFP LLRVLPKEP-----  
-----FRKALILGIPFAANIGGVGTPIGSPPNIIAMGILRQQGI----VIPFGTWMFFAV-PLVVV LIL  
FAWILLMKLF-----  
-----QKDSL DLVVEFQEPERG-MKSFSFRVTSMIFLGTVVLW  
FTE-----NLHGVPAGVVALLPLILFPMF-----GILNE-KDIN--SLDWSVLILISGGIGIGV  
GFQQSGMGPWFSGILKHIAP---EY AISV LFFLCVLTLLSTFMSNTAATNLLVPFAFPFSAILFPGSNV-----YLLEVCL  
GIALSASLAMS LVPSTPPNAIAYSVG-----GIEIKDMICAGLP IGFGLIVVLSYFAFF-----</se  
q-data>

</sequence>

<sequence seq-type="Protein">

<seq-name>NASU\_RAT</seq-name>

<seq-info><length>1375</length></seq-info>

<seq-data>-----  
-----  
-----

-----MKLLNYAFVYRRFLLVVFTVLVLLPLPLIIR-----SKEAECAYILFVIATFWI  
TE--ALPLSITALLPGLMFPMFGIMS-----STHVASAYFKDFHLLLIGVICLATSIEKWNLHKRIALRMVMMVGVN  
PAWLTLGFMSTAF LSMWL-SNTS-TAAMVMPIVEAVAQQITSAEAEAEATQMTYFNESAAQGLEVDETIIGQETNERKE  
KTKPALGSSNDKGVSSKMETE-----KNTVTGAKYRSKDHMMCKLMCLCIAYSSTIGGLTTITGTSTN  
LIFSEHFNTYRYPDC--RCLNFGSWFLFSF-PVAVILLLSWIWLQWFL-----  
-----GFNFKE-MFKCG  
KTKTLKEKACAEVIKQ-EYEKLG-PMRYQEIVTLVIFIVMALLWFSRDPGFVTGW-SVLFSEY-----PGYVTDSTVALVA

GILFFLIPAKKLTGMTSTG-----DIIAFDYSPLITW-KEFQS-FMPWDIAILVGGGFALADGCQVSSLSSWIGSKLSPLGSL-----P  
VWLIILISSLIVTSLTEVASNPATITILFPILSPLAEAIHV-----NPLHILLPSTLCTSFAPLLPVANPPNAIVFSYG-----HL  
KVIDMVKAGLGVNIGVAVVMLGMFTWIEPMFNLHEYPSWAPDIVNQTMP-----</seq-data>  
</sequence>

<sequence seq-type="Protein">  
<seq-name>Q9UKG4</seq-name>  
<seq-info><length>1375</length></seq-info>  
<seq-data>-----

-----MGLLQGLLRVRKLLLVVCPLLLLPLPVLHP-----SSEASCAYVLIVTAVY  
WVSE--AVPLGAAALVPAFLYPPFFGVLR-----SNEVAAEYFKNTTLLLVGVICVAAAVEKWNLHKRIALRMVLMMA  
GAKPGMLLLCFMCCTTLLSMWL-SNTS-TTAMVMPIVEAVLQELVSAEDEQLVAGNSNTEEAEPISLDVKNSQPSLELIFVN  
EDRSNADLTTLMHNENLNGVPSITNPIKTANQHQQKQHPSEQEPQVLTSPRKQKLNKRKYRSHHDQMICKCLSLSISYSA  
TIGGLTTIIGTSTSLIFLEHFNQYPAA--EVVNFGTWFLFSF-PISLIMLVVSWFWMHWLFL-----

--GCNFKE-TCSLSKKKKTKREQLSEKRIQEEYEKLG-DISYPEMVTGFFFILMTVLWFTREPGFVPGW-DSFFEK-----  
KGYRTDATVSVFLGFLFLIPAKKPCFGKKNNDGEN--QEHS LGTEPIITW-KDFQK-TMPWEIVILVGGGYALASGSKSSGLST  
WIGNQMLSLSSL-----PPWAVTLLACILVSIVTEFVSNPATITIFLPILCSLSETHI-----NPLYTLIPVTMCISFAVML  
PVGNNPPNAIVFSYG-----HCQIKDMVKAGLGVNIGLVIVMVAINTWGVSLFHLDTPAWARVSNITDQA-----

</seq-data>  
</sequence>

<sequence seq-type="Protein">  
<seq-name>Q9W7I2</seq-name>  
<seq-info><length>1375</length></seq-info>  
<seq-data>-----

-----MKISVVS KKLWCVHKQLILLIAPLIFLPLIFTLP-----EKEGRCLYVLLMATF  
WCTE--ALPLAVTAMLPVCLFPTLGIIIP-----SKQICPQYFLETNFLFLSGLVMASSIEEWGLHRRIALKVLSIVGVKP  
AWLIFGMMMTSAFLSMWL-SNTA-TTAMMLPIANAILESFGDLETLLKKNCKSPKDSDSDIINGQCTLKMHSLPAVPVEK  
QLLSIEGTDGPEPADVRT-----AEEIRSESEYQLKVWKGFLICIPYAASIGGTATLTGTAPNLILIGQL  
KSYFPDC--DLINFGSWFAFAF-PLMLIFLVGWLWIAIYLYG-----

-----GLNTR--LCIQRHDRRAQA  
EARAQALIQDDYRKLKLG-PMNFAQGAIAFFVLFVAVLLFTRDPKFITGW-SVFFK-----KGYVSDAVTGVIIVSILFFFP  
SQKPSLNWWFDP----QASNTRYVPLLSW-QKAQD-SIPWNIILLGGGFAMAKACEESGLASWIGGHLQPLAEV----PPAA  
AVMLITAFACFTEFASNTATIIIFLPVIAELAIRVSV-----HPLYFMIPATVGC SYAFMLPVSTPPNSIAFASG-----H  
LMVKDMVKTFVMMNILGILCVSLAMNTWGVAMFDLHTYPDWAHPINKTAAAEVVQALNATL-----</seq-data>

</sequence>

<sequence seq-type="Protein">  
<seq-name>Q9Z0Z5</seq-name>  
<seq-info><length>1375</length></seq-info>

<seq-data>-----  
-----  
-----  
-----MAALAALAKKVWSARRLLVLLVPLALLPILFALP-----PKEGRCLYVILLMA  
VYWCTE--ALPLSVTALLPIILFPFMGILP-----SSKVCPQYFLDTNFLSGLIMASAEERNLHRRRIALKVLMVGV  
QPARLILGMMVTTSFLSMWL-SNTA-STAMMLPIASAILKSLFGQRDTRKDLPREGEDSTAAVRGNGLRTVPTEMQFLASS  
EGGHAEDVEAP-----LELPDDSKEEEHRRNIWKGFLISIPYSASIGGTATLTGTAPNLILLGQL  
KSFFPQC--DVVNFGSWFIFAF-PLMLLFLLVGWLWISFLYG-----  
-----GMSWRG-WRKKNSKLQ  
DVAEDKAKAVIQEEFQNLG-PIKFAEQAVFILFCLFAILLFSRDPKFIPIGW-ASLFA-----PGFVSDAVTGVAIVTILFF  
PSQKPSLKWWFDF----KAPNSETEP LLSW-KKAQE-TVPWNIILLGGGFAMAKGCEESGLSAWIGGQLHPLEHV----PPLL  
AVLLITVVI AFFTEFASNTATIIIFLPVLAELAIRLHV-----HPLYLMIPGTVSCSYAFMLPVSTPPNSIAFSTG-----HLL  
VKDMVRTGLLMNLMGVLLLSLAMNTWAQAIFQLGTFPDWANTHAANVTALPPALTNNTVQTL----</seq-data>  
</sequence>

<sequence seq-type="Protein">  
<seq-name>NDC1\_HUMAN</seq-name>  
<seq-info><length>1375</length></seq-info>  
<seq-data>-----

-----  
-----  
-----  
-----MATCWQALWAYRSYLIVFFVPILLPLPILVP-----SKEAYCAYAILMAL  
FWCTE--ALPLAVTALFPLILFPMMGIVD-----ASEVAVEYLKDSNLLFFGGLLVIAIVEHWNLHKRIALRVLLIG  
VRPAPLILGFMLVTAFLSMWI-SNTA-TSAMMVPIAHAVLDQL-----HSSQASSNVEEGSN  
NPTFELQEPSPQK-EVTKL---DNGQAL-PVTSASSE-GRAHLSQK--HLHLTQCMSLCVCYSASIGGIATLTGTAPNLVLQGGI  
NSLFPQNG-NVVNFASWFSFAF-PTMVILLLLAWLWLQILFL-----  
-----GFNFRKNFGIGE--KMQE  
QQQAAYCVIQTEHRLG-PMTFAEKASILFVILVLLWFTREPGFFLGWGNLAFPNAKG-----ESMVSDGTVAIFIGIIM  
FIIPSKFPGLTQDPEN----PGKLGAPLGLLDW-KTVNQ-KMPWNIVLLGGGYALAKGSERSGLSEWLGNKLTPLQSV----PA  
PAIAIILSLLVATFTECTSNVATTTIFLPILASMAQAICL-----HPLYVMLPCTLATSLAFMLPVATPPNAIVFSFG-----  
DLKVLDMARAGFLNIIGVLIALAINSWGIPLFSLHSFPSWAQSNTTAQCLPSLANTTTTSPSP-----</seq-data>  
</sequence>

<sequence seq-type="Protein">  
<seq-name>NDC1\_RABIT</seq-name>  
<seq-info><length>1375</length></seq-info>  
<seq-data>-----

-----  
-----  
-----  
-----MATCWQGLWAYRMYLLVFLLPISLLPLPILVP-----RKEAYCAYAILMA  
LFWCTD--ALPLAVTALLPLCLFPMMGIME-----ASEVGLEYLKDTNVLFIGGLLLAIAVEHWNLHKRIALRVLLLT  
GVRPALLILGFMMVTAFLSMWI-SNTA-STAMMVPIAHAVLQEL-----NNTQSNVEEGSD  
NPTFELQEPSPQK-ETSKVDEKDNGQAQ-PLPAVPLE-SGEHMTQE--QLRFSQGM SLCVCYSASIGGIATLTGTTPNLVLQG  
QMTSLFPQNP-NVVNFASWFGFAF-PIMVILLLLSWLWLQILFL-----

-----GINFRKNFGIREQEHE  
QQRKQAAAYRVIQTQYRLLG-PMSFAEKAVFILFVILVLLWFTREPGFFHGWGNLVFSDASG-----RVMVSDGSASILIG  
VFLFMVPSKIPGLTQDPDN----PGRLKAPPALLNW-KLVNK-KMPWNIVLLGGGYALAKGSEESGLSQWLGNKLMPLQH  
V----PPPATVFIICLLVATFTECTSNAATTTLLLPILASMAQAICL-----HPLYVMLPCTLASSLAFMLPVATPPNAIV  
FSFG-----GLRVSDMARAGIMLNIIGVLVIMLAINSWGVPMLFQLHTFPSWAHSNSTTHCLASPPTAPSP-----</seq-dat  
a>

</sequence>

<sequence seq-type="Protein">

<seq-name>O35055</seq-name>

<seq-info><length>1375</length></seq-info>

<seq-data>-----  
-----  
-----

-----MATCWPALWAYRFYLIVLCLPIFLLPLPLIVQ-----TKEAYCAYSIIIMALL  
WCTE--ALPLAVTALFPIVLFPLMGIMD-----ASEVCIEYFKDTNIFVGGMLMVAIAVEHWNLHKRIALQVLLIIGVR  
PALLLLGFMLVTAFLSMWI-SNTA-TTAMMVPIGHAVLEQL-----QGSKKDVEGGNNP  
TFELQECPQK-EVTKL---DNGQ---PV-SAPSE-PRTQKTQE--HHRFSQGLSLCICYSASIGGIATLTGTTPNLVLQGQVNSLF  
PQNG-NVVNFASWFGFAF-PTMIILLLLAWLWLQVLF-----

-----GVNFRKNFGFGEGEREERKQA  
A--FQVIKTQYRLLG-PMSFAEKTVTVLFVLLVLLWFTREPGFFPGWGDVTFANEKG-----QSMASDGTVAIFISLVMF  
IIPSKIPGLMQDPKK----PGKPKAPPAILTW-KTVND-KMPWNIVILLGGGFALAKGSEQSGLSEWLGDKLTPLQHI----PPSA  
TAVILCLLIAIFTECTSNAVTTTLFPLILASMAQAICL-----HPLYVMLPCTLAASLAFMLPVATPPNAIVFSFG-----G  
LKVSDMARAGFLLNIIGVLAITLSINSWSIPIFKLDTFPSWAHSNTSQCLLNPSNSTVPGGL-----</seq-data>

</sequence>

<sequence seq-type="Protein">

<seq-name>NDC2\_RAT</seq-name>

<seq-info><length>1375</length></seq-info>

<seq-data>-----  
-----  
-----

-----MATCWPALWAYRFYLIVLCLPIFLLPLPLIVQ-----TKEAYCAYSIIIMALL  
WCTE--ALPLAVTVLFPIVLFLLMGIMD-----ASEGLHRVLSRTPTYCLSGADGGHCCRTLEPAQTHCPPSASYHR  
SAAALLLLGFMLVTAFLSMWI-SNTA-TTAMMVPIGHAVLEQL-----QASKKDVEGGNN  
NPTFELQECPQK-EVTKL---DNGQ---PV-SAPSE-PRTQKTQE--HHRFSQGLSLCICYSASIGGIDNLTGTTPNLVLQGQVN  
SLFPKMQCGELCFVWVWFRPH-HDHAAAGLAMATGPLPGC-----

-----QLPEELWLWGRGRGT  
KAGC---FPGHQDPVQAAGAHEFCREDLFTVLFVLLVLLWFTREPGFFPGWGDVTFANEKG-----QSMPSDGTVAIFI  
SLVMFIIPSKIPGLMEDPKK----PGKPKAPPAILTW-KTVND-KMPWNIVILLGGGFALAKGSEQSGLSEWLGDKLTPLQHI---  
--PPSATAVILCLLIAIFTECTSNAVTTTLFPLILASMAQAICL-----HPLYVMLPCTLAASLAFMLPVATPPNAIVFSF  
G-----GLKVSDMARAGFLLNIIGVLATLTSINSWSIPIFKLDTFPSWAHSNTSQCLLNPSNSTVPGGL-----</seq-data>

</sequence>

<sequence seq-type="Protein">

<seq-name>O57661</seq-name>

<seq-info><length>1375</length></seq-info>

<seq-data>

-----MVSIGKWILANRNYFIIFLVPLFLLPLLVVP-----TKEASCGFVIIVMALF  
WCTE--ALPLAVTALFPVLLFPMMGIMD-----STAVCSQYLKDTNMLFIGGLLVAISVEKWNLHKRIALRVLLIVG  
VKPALLLLGFMVVTAFLSMWI-SNTA-TTAMMIPIAQAVMEQL-----HSSEGKVDERVEGNSNTQKNVNGMENDMYESV  
MPSGKMALAI DNTYATENEGFEIQEKSTKDPEPSK----QEKQSIGPIVIEPEDEKQTEEKQKEKHLKICKGMSLCVCYSASIGG  
IATLTGTPNLVMKQGQMDLFPENN-NIINFASWFGFAF-PTMLVLLALS WLWLQFIYL-----

-----GVNFKKNFGCGGNAEQKEKEKRAFRVISGEHKKLG-SMTFAEISVLVLFILLVLLWFTREPGFMPGWATISF-NKGG-----  
---KEMVTDATVAIFVSLMMFFFPELPSFKYQDTPKPGMKPKLRVPPALLDW-KTVNE-KMPWNIVILLGGGFALAKGSEE  
SGLSLWLGEKLTPLQSI-----PPAAIALILCLLVATFTECTSNVATTTFLPILASMAKAIQL-----NPLYIMLPCTLSASL  
AFMLPVATPPNAIAFSYG-----QLKVIDMAKAGLLLNLGVL TITLAINSWGFYMFNLGTFPSWANATGQH-----

--</seq-data>

</sequence>

<sequence seq-type="Protein">

<seq-name>YV06\_CAEEEL</seq-name>

<seq-info><length>1375</length></seq-info>

<seq-data>

-----MARKRGISLLLIYKQSFVIWGALLIFSPLLMFVG----DSHGLQAKCLYCVAV  
MGSYWVFE--ALPLAITAFIPMILFPLFGIMR-----SEEVARAYLPDTCFLFMGGLMVALAVEKCELHARVALFVL  
KTVGSEPARVMAGFMGVTGFLSMWI-SNTA-TTALMVPILQSVITELVSNHRMEDLVALCEAHN SSRKHSVGMRRLSLP  
NENNEIKREEMDTAMSPREQ-----KMAKGLMLSVCF SANIGGAATITGTASNLV  
LVGQLNELFPGAD-TGVNFLSWLIFAF-PMVFCCLIYCWCVLYLLYL-----

-----RDAPKG  
SIIVTRKLQQKYNELH-AFSFAEMAVIFCFALLLVLWILREPQVVPGWGEMFKDELVFKSLTEKKNTHLTFRFVSDATSAMFI  
VILLFTLPEKLPSSRGSS-----EQRKASSGLLDW-ATVQD-RFPWSVLFLLGGGFALAAGVKESGLSHDIGAIMRYLDVF-----  
NHNIIIMLICIISVTLTNVCSNTVIASIFIPIVAELARSLEI-----DPLNFMLPVTISASFALLPVATPPNAIVFSSG-----  
YLVKVFDMFVSGLCVTLGCVVLSMLNMLLWAGFVFNLHLPQWAANPSPPLDVQDWAVENNITFVGTSKL</seq-data>

</sequence>

<sequence seq-type="Protein">

<seq-name>YM22\_CAEEEL</seq-name>

<seq-info><length>1375</length></seq-info>

<seq-data>

-----MQIRHVRKMDFLEILAVAKNEKFWKIGSPPTIRKNP----ANWQLEWKCAVC  
VCIIAVYW MSE--VMPLAVTAML PVVLFPLVGVLD-----ANTTAKEYMNDTNFLFIGGLIMAAAVEKCDLHERV

ALSVLRVGVGSEPKWIMLGFMTVTALLSFI-SNTA-TTAMMVPIGQSVVQQLISSFQHHPTNGERGLGCK-----  
-----KMATGLVLSICFAANIGGTGTATGTPSNLVMLGQLSALFPKV  
D-GSLNYVTWIFFAY-PLMLLCLFVAWMTLVSFLL-----  
-----RDAPEKDEAVTEMLKTR  
YNELP-RMTYAEKSVFVFCILLSLWVFRNPGVVPFGFVFFK-----KGAYTDATSAMIVAFLLFVLPSEKPDLATYIK  
K----EDLKKRGCLMDW-KTMQE-TFPWSVLLLLGGGFALAAGVKESGLSLLIGNSLSSIEHL----PLWILQLLTMLIAMVITN  
ICSNTVTASIFVPIVATLAQRAGH-----HPFTLMLPTTLASSFAFIFPVGTPPNAIVFGSG-----MVKVSDMAFVGG  
IISLELLVLTVLYMNSIAYLTLPLLEFPTWAIIANSTMQQ-----</seq-data>

</sequence>

<sequence seq-type="Protein">

<seq-name>YKG6\_CAEL</seq-name>

<seq-info><length>1375</length></seq-info>

<seq-data>-----  
-----  
-----

-----MPFESTEGKCAFVILTMSCYWVAE--VVPL  
AVTSFIPMIALPFLGIVS-----IKEVAPKYFADTNIVFFNSLMLS LAVEECQLHKRIALKMLTYVGRPHWLMAGF  
MIITSFISLWI-SDTA-CCALMAPIAYALLEEIMIPKMRPEEKENEIEVMKIFDKEDPEEKEKKKLDTSRSLVRDR-----  
-----GICKCMMLLVAHASLIGGTGTINSTGPNLIFRDNIEKNFPNEDHGIS-YLSWMAFAI  
-PPMIFYMFSSWFIVQLQFL-----  
-----GPRHLMGMFREPTETEKQEEVAKRAVWKSVDQLG-P  
MTWAEKSTLVIFVLAVLSWVSSDPKVIPGWSDLFR-----KGYVTDSCSGLVAVFLFIWPKKKPDFRIFRKD---KSR  
PSVRQEPLIDW-DCVRR-RFPWSIILLGAGFAISDAVRVSGLSLIACSLNSTISK----MPFFVMQIILSIVVVVMTEFSTNSAT  
ASIFIPISFKMAEAVGA-----HPLYFSIPTAIGPSFSFMLPMATPANAIYETK-----TIRMIDMVSCGVFLNIFCIAIT  
AINMNTWAFWLFNMGTYPDYALRHATNMTGNSSQCF-----</seq-data>

</sequence>

<sequence seq-type="Protein">

<seq-name>YNH1\_CAEL</seq-name>

<seq-info><length>1375</length></seq-info>

<seq-data>-----  
-----  
-----

-----MKPSPQRTLIKLLVLLGPLVAVPLLFFGP-----EYRCLFSIIFLSTYWI  
GE--AFPIGVTSFLPLALYPILQIVP-----SKQISPVYFKDSIVLFMCTLMAMAVEATGLHRRIALKLLTKVGAKQP--  
-----VSFFV-SDTA-CTALMCPTAVALLMSMSDAVQHLKEDHRKPKP-PPDDATVAEKLRIIDMTPQDA-----  
-----GFCALILACAHASLIGGTAITSTGPNLVFRENIHKRYPEGQ-VTMTYLQWM  
VFAI-PPMFVYLLASYIILVCYFM-----  
-----GPSTFARWFERPSKEEAHLKLLIEKNIQTMIEDLG-DV  
SWGEKSVFVFFILLIGSWISRDPGFTPGWGDLLPH-----RNFISDSVSGVLISCILFVWPKDPDPIDP-----M  
APILKW-TDMKS-KFSWSCTLLIGAGYASEGVKSGLSRLISCGMKNIFVG----MSSLPLQLTVTIIVIMTEFASNVSTGSIFI  
PISLGVVAESMGV-----HPLYLALPTTVACSFAMLPSTPPNAVVDTK-----VISMVEMIVCGFLLNIACILITSLN  
MNTWYFIFSLNIFPENIVISSENSYPVC-----</seq-data>



</sequence>  
<sequence seq-type="Protein">  
<seq-name>O25003</seq-name>  
<seq-info><length>1375</length></seq-info>  
<seq-data>-----  
-----  
-----  
-----MENHSHANTHTDTRTDDKSTKIVRLGLIGGALIALVIYYALNSQMPHIVEEIPKLSSLNYKA  
MPVVAGVAVLMGIWWMTE--AIDL PATALLPLVLFVFSVDQ-----FASVSSSYASPIIFLMGGFILALSMQKW  
NLHTRIALSIILLVGTSPRRILGFMMATGFLSMWV-SNTA-TAVMMLPVGMSVLQLVAKLVGKEDASNSWHQKEITKA  
HGGIMSNIVHKGKDITQVIQEKTIIYRT-----NFSICLMLGIAYAASIGSLGTLIGT  
PPNALLAGYMKTAFNIE---IDFAQWMVFGT-PLAFIMLILAWLLLTYVIF-----  
-----PL  
KIKEIPGGKEVIRVELKKG-RLSQAEISVGIIFILASLWIFL-GVMLKSWGVS-----KIDKIDSVIAMGVSALLFILP  
ANHQ-----GDRLIDW--GVAK-KLPWDVLLLFGGGLALSAQFSKTGLSLWIGHLVSGFSL-----PILFIIVMVTLM  
VIFLTEITSNTATAAAFLPVIGGVAMMGYENH-----QSLLLTIPVALSATCAFMLPVVTPPNAIAYGSG-----YVKIT  
DMIKAGLWLNLVGVVLISTFSYFLVSLIFN-----</seq-data>

</sequence>  
<sequence seq-type="Protein">  
<seq-name>Y608\_HAEIN</seq-name>  
<seq-info><length>1375</length></seq-info>  
<seq-data>-----  
-----  
-----  
-----MGEMASLRSHKNGIIFILDIVLFFVLLNVLP----FEPKANSGLALLAFIAV  
LWLSE--ALHVTITALLVPLLAVALGLVS-----TKQALVGFADPTIFLFFGGFSLATALHIQKLDKLIANKIMALARGN  
LFIAYIYFLITAFLSMWM-SNTA-TAAMMLPLAMGILSQLDREKDH-----  
-----NTYVFVLLGIAYSASIGMGTLVGSPPNAIVASNLN-----LTFSDWLWYGL-PIMIILLP  
LMIGILYIIFK-----  
-----PKLHLNFEQTFENIEMNPMRILT-FIIFPVIALTWIFSGKINPFIS-  
-GLLGLQK-----NIASFDSIVALLAAIVICST-----GVASW-KQIQS-NTDWGVLMFLGGGLTL  
SAVLKDSGASKILADSIVFMIDG---QHFYLIGLLVAAFIIFLTFEFTSNTASAALLVPIFISIAQSLGM-----PEIGLALIIG  
IGASCAFMLPVATPPNAIVFGSG-----QVKQSEMVKVGFLLNLVCVVVIATMGYMFWLK-----  
</seq-data>

</sequence>  
<sequence seq-type="Protein">  
<seq-name>O66449</seq-name>  
<seq-info><length>1375</length></seq-info>  
<seq-data>-----  
-----  
-----  
-----MNKNVFLVLAILVFFGVLTISP----FEGNVNKGIAILLAAAILWIT

E--ALPLPVTALLIPVSGVLLGVFD-----VKTALS YFAHPLIFLFFGGFVLAVALSKYQIDEYIAHKIVSVAQGGKFLPSV  
FLLMLATSLISMWI-SNTS-TTAMMLPLALGILAGVRETERE-----  
-----KVFPFVLLGIAYSASVGGIGTLVGSPNGIAAGILG-----LSFPDWLKFGEI-PVFLILFPLLFAILFLV  
FR-----  
-----PTSDLKVERVQEIKFETPQRVLLVLLIFLFTALAWIFSKKIPIFE-----  
-----VKKYFDTVVALAVVLFIF-----RLLDW-RDVKE-GVSWGTLFLFGGGIALSGIMKKTGTAK  
FISQELVDVLHG----LPTFLLLTIVLFVIFLTELMSNTATTALIAPILFSTAQMIGK-----PPEMLVIPAAVAASCAFM  
LPVATPPNAIVYGTG-----YIKQSQMMRVGLILNIVFSIVLAAFFTVYVGG-----</seq-data>  
</sequence>

<sequence seq-type="Protein">  
<seq-name>Y672\_METJA</seq-name>  
<seq-info><length>1375</length></seq-info>  
<seq-data>-----  
-----  
-----

-----MRLSKEFIGLGIITASLIFGSSLP-----DIYKGIVILIVAGCLWFFE--  
LLPLPVTSLAIPIMAVFLGIFN-----LKEALTYFAHPHIFLGGFMLAQALKNHNLDKFIAYKLL-NYGKDFKTTCFL  
MFLSAYFLSMWI-SNTS-ATLILLPIALGLLHKKTG-----  
-----KLRDFLLLGVAYSASIGGIATIIGSPNIAIASSYLD-----YGFFSWFKVGF-PISLLLFLICTLTLYIYFK-----  
-----  
-----KWIPKEDIAIQARMELSRNAYKLLVIFVLIASLWIISDYLS EIF-----  
---NVQYFDSVIAIFAILLFVF-----NLVEV-NDFK--KIDWGTLLIFGGALCLGGVIVKSGANTFLSEKLIAILG  
N---LTPIVLLFLVVTITILTNTFISNTGLTGIIVPILFGVS--LGI-----PKEILILAVGMSASCSFILPVGTPPNAIVYSEG--  
---VKKE-EMMKIGMILSILSAAVITLYSILYL-----</seq-data>

</sequence>  
<sequence seq-type="Protein">  
<seq-name>ARSB\_STAXY</seq-name>  
<seq-info><length>1375</length></seq-info>  
<seq-data>-----  
-----  
-----

-----MTILAVIFLLTLFVIWQPKGLDIGITA  
LIGAVVAIITGVVSFS-----DVLEVTGIVWNATLTFVAVILISLILDEIGFFEWSAIHMKASNGNGLKMFVFMILLGA  
IVA AFF-ANDG-AALILTPIVLAMVRNLGFNKK-----  
-----VIFPFIIASGFIADTTSLPLIVSNLVNIVSADYF-----DIGFIEYFSRMIIPNIF-SLIASILVLWLYFRK-----  
-----  
-----SIPKTFNTENLSDPKNVIKDPKLFKLSWIVLAILLVGYLVSEFIQ-----  
--IPVSIAGIILFVILA-----RKS KAVHT-KQVIK-GAPWNIVVFSIGMYLVVFGKLVGITTILGDILTNISSYG----  
-LFSSIMGMGFIAAFLSSIMNMMPTVLIDAIAGQSSATGI-----LKEGMVYANVIGSDLGPKITPIGSLATLLWLHV  
LTQKGVK-ISWGTYFKTGIIITIPVLFVTLGLYLTLLIF-----</seq-data>

</sequence>  
<sequence seq-type="Protein">

<seq-name>P96678</seq-name>  
<seq-info><length>1375</length></seq-info>  
<seq-data>-----  
-----  
-----  
-----MTSMILAVFIFLLTLVLVIWQPKNLSIG  
WSACGGAVLALIAGVVNFH-----DVLTVTGVWNATLAFVAILISLILDNIGFFFEWAALHMAKAAKGYGVRMFVY  
VSLGAIVAALF-ANDG-AALILTPIVLAMVRALHFNEK-----  
-----LVFPFIASGFIADTTSLPFVVSNLVNIVSADYF-----HITFIDYASRMVVPYLF-SLLASIIVLYLFFRK--  
-----  
-----SIPKRYDLTEVKKPVEAIKDQNMFRLSWYILGLLLIGYFASEFFS-----  
-----IPVSVVAGSIAIIFLIAA-----QKSPAVHT-KKVVK-EAPWAIVFFSIGMYVVVYGVNAGLTDVLS  
DVIQAAADQG----LFAGTIGMGFIAAILSSIMNNLPTVMIDALAIAGTDTHGM-----MREALIYANVIGSDLGPKI  
TPIGSLATLLWLHVLSHKGMK-ISWGTYFKTGIIITPTLLITLVGLYIWLIIHSCF-----</seq-data>  
</sequence>

<sequence seq-type="Protein">  
<seq-name>ARB2\_ECOLI</seq-name>  
<seq-info><length>1375</length></seq-info>  
<seq-data>-----  
-----  
-----  
-----MLLAGAIFVLTIVLVIWQPKGLGIGW  
SATLGAVLALISGVVHIG-----DIPVWNIVWNATATFIAVIIISLLLDESGFFFEWAALHVSRWGNRGRLLFTYIVLL  
GAAVAALF-ANDG-AALILTPIVIAMLLALGFSKG-----  
-----TTLAFVMAAGFIADTASLPLIVSNLVNIVSADFF-----GLGFTEYASVMV-PVDIAAIIATLVMLHLFFRK--  
-----  
-----DIPPTYDLALLKAPAKAIKDLATFRTGWIVLILLVGGFFVLEPLG-----  
-----IPVSAIAAVGAVILFAVA-----NRGHAIN-TGKVL-RGAPWQIVIFSLGMYLVVYGLRNAGLTEYLS  
GVLNVLADKG----LWAATFGTGFLTAFLSSIMNNMPTVLVGLSIDGSTATGV-----IKEAMIFANVIGCDLGPKI  
TPIGSLATLLWLHVLSQKNMT-ITWGYFFRTGIVMTLPVLFVTLAALALRSFTL-----</seq-data>

>  
</sequence>  
<sequence seq-type="Protein">  
<seq-name>ARSB\_ECOLI</seq-name>  
<seq-info><length>1375</length></seq-info>  
<seq-data>-----  
-----  
-----  
-----MLLAGAIFVLTIVLVIWQPKGLGIGW  
SATLGAVLALVTGVVHPG-----DIPVWNIVWNATAAFIAVIIISLLLDESGFFFEWAALHVSRWGNRGRLLFTWI  
VLLGAAVAALF-ANDG-AALILTPIVIAMLLALGFSKG-----  
-----TTLAFVMAAGFIADTASLPLIVSNLVNIVSADFF-----GLGFREYASVMV-PVDIAAIVATLVMLHLYF

RK-----  
-----DIPQNYDMALLKSPAEAIKDPATFKTGWVLLLLLVGFFVLEPLG-----  
-----IPVSAIAAVGALILFVVA-----KRGHAIN-TGKVL-RGAPWQIVIFSLGMYLVVYGLRNAG  
LTEYLSGVLNVLADNG----LWAATLGTGFLTAFLSSIMNNMPTVLVGALSIDGSTASGV-----IKEAMVYANVIG  
CDLGPKITPIGSLATLLWLHVLSQKNMT-ISWGYFRTGIIMTLPVLFVTLAALALRLSFTL-----</s

eq-data>

</sequence>

<sequence seq-type="Protein">

<seq-name>ARB1\_ECOLI</seq-name>

<seq-info><length>1375</length></seq-info>

<seq-data>-----  
-----  
-----

-----MLLAGAIFILTIVLVIWQPKGLGIGW  
SATLGAVLALASGVIIHIA-----DIPVWNIVWNATATFIAVIIISLLLDESGFFEWAAALHVSRWGNGRGRLLFTYIVLL  
GAAVAALF-ANDG-AALILTPIVIAMLLALGFSKS-----  
-----TTLAFVMAAGFISDTASLPLIVSNLVNIVSADFF-----KLGFTYASVMV-PVDIAAIIATLVMLHLFFRK---

-----DIPPTYELARLKEPAKAIKDPATFRTGWVLLLLLVGFFVLEPMG-----  
-----IPVSAIAAVGAAVLFVA-----KKGHGINT-GKVL-RGAPWQIVIFSLGMYLVVYGLRNAGLTDYL  
SDVLNELADKG----LWAATLGTGFLTALLSSIMNNMPTVLIGALSIDGSTATGV-----IKEAMIYANVIGCDLGPKI  
TPIGSLATLLWLHVLSQKNMT-ITWGYFRTGIVMTLPVLFVTLAALALRLSVTL-----</seq-data

>

</sequence>

<sequence seq-type="Protein">

<seq-name>ARSB\_YEREN</seq-name>

<seq-info><length>1375</length></seq-info>

<seq-data>-----  
-----  
-----

-----MLLAGSIFVLTLLAIWQPRGLSIGWS  
ASICAALALVSGVIHVG-----DIPVWNIVWNATATFIAVIIISLLLDESGFFEWAAALHVSRWGNGRGRLLFTWIVLL  
GAAVAALF-ANDG-AALILTPIVIAMLLALGFSKR-----  
-----TTLAFVMAAGFIADTASLPLIVSNLVNIVSADFF-----RLGFTEYASVML-PVDIAAIIAATLGMLHLFFRR--

-----DIPATYDVSLLKMPASAIKDPATFRAGWIVLVLLLGVGFFVLEPLG-----  
-----IPVSAIAAVGTVVLFAVA-----KKGHAIN-TGKVL-RGAPWQIVVFSLGMVLYVYGLRNAGLTE  
YLSGVLNMLADKG----LLAATFGTGFLTAFLSSVMNNMPTVLVGALSIDGSTASGV-----IKEAMIYANVIGCDL  
GPKITPIGSLATLLWLHVLSQKNMT-ISWGYFRTGIIMTLPVLFVTLAALALRLSVTL-----</seq-

data>

</sequence>

<sequence seq-type="Protein">

<seq-name>Q9YG46</seq-name>  
<seq-info><length>1375</length></seq-info>  
<seq-data>-----  
-----  
-----  
-----MDLVAALLFTLTIMLVVSR--YVDEVA  
AALAGVTALILLTNYT-----PEEAFNFVEWNVIAILLGMWIIAGYMIIEGGFTE-ATIRLVRSAGTYRKFLLYMALLS  
GFISMFI-DNVL-VILLVGSLTIAAAKKAGG-----  
-----NPVLAILLVGFSANFMGTALLMGDLPPQLLHTIA-----GAEFLDFIWTRGKPSFPLLTATFLLTLGVFYI-----  
-----  
-----LFIRREPNSRIDDAGLSGESTNRGGLLIISLTFFMTVIAMALRP-----  
-----LLGFPLGFITMAGASQLALTVEVLRRLGLA-----GMVEF-ENALK-HVEWRALLFYAALFSLVGGLESEGVEIEIA  
RLLVGSVSSD----PAIAYTVMYWSVGLLSLVIEHDALLTFLYIVKDAASLAGI-----DPWNIYWGMAWSATLASN  
ATTAAPALYVAVAMSDREGHR-VRALEFLKYSLTFAFTSLIIHYIITLIVWI-----</seq-data>  
</sequence>

<sequence seq-type="Protein">  
<seq-name>YQ84\_MYCTU</seq-name>  
<seq-info><length>1375</length></seq-info>  
<seq-data>-----  
-----  
-----  
-----MSVVAVTIFVAAAYLIASD--RVNKTM  
VALTGAAAVVVLVITSHD-----IFYSHDTGIDWDVIFLLVGMMIIVGLRQTGVFEYTAIWAAKRARGSPLRIMILL  
VLVSALASALL-DNVT-TVLLIAPVTLVCDRLNI-----  
-----NTTSFLMAEVFASNIGGAATLVGDPPNIIVASRA-----GLTFNDFMLHLT-PLVVIVLIALIAVLPRLFG----  
-----  
-----SITVEADRIADVMALDEGEAIRDRGLLVKCGAVLVLVFAAFVAHP-----  
-----VLHIQPSLVALLGAGMLIVVS-----GLTR-SEYLS-SVEWDTLLFFAGLFIMVGALVKTGVVND  
LARAATQLTGGN----IVATAFLILGVSAPISGIIDNIPYVATMTPLVAELVAVMGGQP-----STDTPWWALALGADF  
GGNLTAIGASANVVMGLIARRAGAP-ISFWEFTRKGAVVTAVSIALAAIYLWLRVYFVLLH-----</s  
eq-data>

</sequence>  
<sequence seq-type="Protein">  
<seq-name>YQ85\_MYCTU</seq-name>  
<seq-info><length>1375</length></seq-info>  
<seq-data>-----  
-----  
-----  
-----MSIIAITVFVAGYALIASD--RVSKTRVA  
LTCAAIMVGAGIVGSDD-----VFYSHEAGIDWDVIFLLGMMIIVSVLRHTGVFEYVAIWAVKRANAAPLRIMILLVL  
VTALGSALL-DNVT-TVLLIAPVTLVCDRLGV-----  
-----NSTPFLVAEVFASNVGGAATLVGDPPNIIIASRA-----GLTFNDFLIHMA-PAVLVVMIALIGLLPWLLG----

-----SVTAEPDRVADVLSLNEREAIHDRGLLIKCGVVLLVFAAFIAHP-----  
-----VLHIQPSLVALLGAGVLRFS-----GLER-SDYLS-SVEWDTLLFFAGLFVMVGALVKTGVVEQL  
ARAATELTGGN-----ELLTVGLILGISAPVSGIIDNIPYVATMTPIVTELVAAMPGHV-----HPDTFWWALALSADFGG  
NLTAVAASANVVMLGIARRSGTP-ISFWKFTRKGAVVTAVSLVLSAVYLWLRVYFVG-----</seq  
-data>

</sequence>

<sequence seq-type="Protein">

<seq-name>AG45\_MYCLE</seq-name>

<seq-info><length>1375</length></seq-info>

<seq-data>-----

-----MSVIAITVFIVTYALIASD--RVNKTAA  
LTGAAIVVTLPIINSED-----VFYSHETGIDWEVIFLLLSMMIIVSVLRQTGVFEYVAIWTAKRSHGSPLRILLLLVLMVA  
LGSALL-DNVT-TVLLIAPVTLLVCERLTI-----  
-----NAAPFLMAEVFASNIGGARTLVGDPPNIIIASRA-----GFSFNDFLIHLT-PIVIVTVVLSALLPRLFRG-----

-----AFAVDPERVADIMSLNEREAIARDRWLLIKCGVLLLVFAAFIAHP-----  
----VLHTGPSLVGMLGAGILIVIS-----KLER-SDYLS-SVKWETLLFFAGLFIMVGALVKTDDVVNQLARATTTL  
TGGH-----ELLTVVLTLGVSTLVSSIIDNIPYVATMTPIVSELVASMPDQS-----HTDILWWALALGADFGGNTAVGA  
SANVVMLEIAKSAGTP-ISFWEFTRKGIAVTVISIALAGIYLWLRVYVMS-----</seq-data>

</sequence>

<sequence seq-type="Protein">

<seq-name>P\_HUMAN</seq-name>

<seq-info><length>1375</length></seq-info>

<seq-data>-----

-----MHLEGRDGRRYPGAPAVELLQTSVPS-----GLAELVAGKRRLPRGAGGADPSHSCPRGA  
AGQSSWAPAGQEFASFLTGRSHSLPQMSSSRKSDSCFTENTPLLRLSLQEKGSRCIPVYHPEFITAEESWEDSSADWER  
RYLLSREVSGLSASASSEKGDLLDSPHIRLRLSKLRRCVQWLKVMGLFAFVVLCSILFSLYPDQGKLWQ-LLALSPLNYSVNL  
SSHVDSTLLQVDLAGALVASGPSRPGREEHIVVELTQDDALGSRWRRPQQVTHNWTVYLNPRRSEHSVMSRTFEVLTRET  
VSI-IRASLQQTQAVPLMAHQYLRGSVE-----TQVTIATAILAGVYALIIFE--IVHRTLAAMLGSLAALAALAVIGDR-----  
----PSLTHVVEWIDFETLALLFGMMILVAIFSETGFFDYCAVKAYRLSRGRVWAMIIMLCLIAAVLSAFL-DNVT-TMLLFTP  
TIRLCEVLNL-----DPRQVLIAEVIFT  
NIGGAATAIGDPPNVIIVSNQELRKM----GLDFAGFTAHEMF-IGICLVLLVCFPLLRLLYWN-----  
-----RKLYNKEPSEIVELKHEIHVWRLTAQRI  
SPASREETAVRRLLLGKVLALEHLLARRLHTFHRQISQEDKNWETNIQELQKKHRISDGILLAKCLTVLGFVIFMFFLNSFVP--  
-----GIHLDLGWIAILGAIWLLILA-----DIHDF-EIILH-RVEWATLLFFAALFVLMELALHLH  
LIEYVGEQTALLIKMVPEEQRLIAAIVLVVWVSALASSLIDNIPFTATMIPVLLNLSHDPEVGL-----PAPPLMYALAFG  
ACLGNGTLIGASANVVCAGIAEQHGYG-FSFM EFFRLGFPMVVSCTVGM CYLLVAHV VVGWN-----

-----</seq-data>

</sequence>

<sequence seq-type="Protein">  
<seq-name>Q62052</seq-name>  
<seq-info><length>1375</length></seq-info>  
<seq-data>-----  
-----MRLENKDIRLASAVLEVELHQTSALSVP TCDPGRLLTVKPATSNYKLGQADPCIPYAGEA  
AGKSVCVPEHTEFGSFLVKG-----SSSLKDLSFKEDTPLLWNSSQKKRSQLMPVHHPEFIATEGSWENGLTAWEQKCM  
LGKEVADLSALASSEKRDLAGSVHLRAQVSKLGCCVRWIKITGLFV FVVLCSILFSLYPDQGKFWQ-LLAVSPLENYSVNLSG  
HADSMILQLDLAGALMAGGSPSGSKEEHVVVVVTQTDAAGNRRRRPQQLTYNWTVLLNPR-SEHV VVSRTFEIVSREAV  
SIS-IQASLQQTRLVPLLLAHQFLGASVE-----AQVASAVAILAGVYTLIIFE--IVHRTLAAMLGALAALAALAVVGDR-----  
----PSLTHVVEWIDFETLALLFGMMILVAVFSETGFFDYCAVKAYQLSRGRVWAMIFMLCLMAA ILSAFL-DNVT-TMLLFT  
PVTIRLCEVLNL-----DPRQVLIAEVI  
FTNIGGAATAIGDPPNVIIVSNQELRKM----GLDFAGFTA HMF-LGICLVLLVSFPLLRLLYWN-----  
-----KKLYNKEPSEIVELKHEIHVWRLTA  
QRISPASREETAVRGLLLEKVLALEHLLAQR LHTFHRQISQEDKNWETNIQELQRKHRISDRSLLVKCLTVLGFVISMFFLNSF  
VP-----GIHLDLGWIAILGAIWLLILA-----DIHDF-EIILH-RVEWATLLFFAALFVLMEALT  
HLHLVEYVGEQTALLIKMVPEDQRF AAAIVLIVWVSALASSLIDNIPFTATMIPVLLNLSQDPEISL-----PALPLMYAL  
ALGACLGNGTLIGASTNVVCAGIAEKHGYG-FSFMEFFRLGFPVMLMSCTIGM CYLLIAHIVVGWN-----  
-----</seq-data>

</sequence>  
<sequence seq-type="Protein">  
<seq-name>Q9Y163</seq-name>  
<seq-info><length>1375</length></seq-info>  
<seq-data>-----  
-----MAYNPNSSAEDNAYEDDEVTEGALQVWRTLPERIRQDPSLASFRQEHERLHGDVDQLH  
AEESLRVQNGHHEETALANQPFTQIGINVTNEAGQVRVLDGRDLENNND DQHDEAPHA KSLIRKYLIWFKIAILLV VWC  
VFTAFLMSNNEHVDQLSLISVPRNSSPRVFPIATASLQRIGLGLRGP FRLQENELAINASVPLPLLQVQVMRSYFDGEGMEI  
YIENASQVWQLDVVY-----PDLIDATRD TKKQRTFELSPTDPLWLAQANRT-----ELSF EFTSSIEGELP-LQLN  
VDESPIYKRDG-----VIYAAAVLCGLYVM IWE--IVNRTFAAIIASTLSV GILAALNSR-----PSMATIMGWI  
DVETLLLLFGMMILVAILSETGVFDYLAVYAYKITNGHVWPLINCLCLF TAVLSSFL-DNVT-TVLLMTPVTIRLCEVMCL-----  
-----NPVPILMCMVIYSNIGGALTPV GDP  
PNVIIASNSYISKN----GVNFAVFTLHML-PGVLLVMVQTYIQLRFKFRN-----  
-----ISDLQFKDSPEVEELRHEIHVWKRAAASLSAYS KDEELVR  
QTLMKKVNRL----KRSLKKRMTAVIEPAPNYQQT LANLQAKYPIRNKPLLIKCSAALVFVISLFFLHSVPE-----  
----LQRLSLGWTALLGAIFLILA-----DIEDM-EAILA-RVEWSTLLFFAALFILMEALTELG LIEWIGNMTEGIIL  
GVGEDRRMLVAILIILWVSAVASAFVDNIPLTTMMVKITISLAQNSTLNL-----PLQPLVWALALGACLGNGTLIGA  
SANVVCAGVAEQHGYK-FTFLQFFKVGFPIMIGSIIVTTGYLLVSHSLFAWH-----</seq-data>

</sequence>  
<sequence seq-type="Protein">  
<seq-name>O59575</seq-name>  
<seq-info><length>1375</length></seq-info>  
<seq-data>-----  
-----

-----MISEVEITLGIFIATYAVIISE--KIHRTVAA  
LLGASIMLVLNIVP-----WEKVPEYLDLDTILLLAGMMVVVNISKESGLFEYIAIKVAKVSKGNPIRVLLLFSVTTAV  
VSAFL-DNVT-TVLLLTPMLLYITRRMGV-----  
-----NPVPYLLAEIFASNIGGTATLIGDPPNIMIGSAA-----KLSFNDFIVNMA-PISFMDLFIMIALVYILYKK-----  
-----EFSRVKYNLDGIMNLRREEDAIDRELFKKSIVITIGLIIVAFFFDALG-----  
-----IE-PAVVALTGATILLWS-----RVSP-EVALE-KVEWATLFFFGLFIIVGGLVETGLIDEAGKWIVRHIT  
S-----ENEAILLISWISAFSSAIIIDNIPFTATMIPLIKSMAGSI-----NIYPLWWALSGLGACLGNGTAIGASANVVVL  
GIAYREGIR-ITFKDFLKVGMAMISSVAAGSLVLIARYGGGI-----</seq-data>

</sequence>

<sequence seq-type="Protein">

<seq-name>Q9UY19</seq-name>

<seq-info><length>1375</length></seq-info>

<seq-data>-----  
-----  
-----

-----MVSELEIHALGVFISVYAAIISE--KIHRTVA  
AMLGASIMLFLKIVP-----WENIPEYLDLDTILLLAGMMVIVNISRESGLFEYIAIKVARISKGDPMRVLLLFSVTTA  
VVSFAFL-DNVT-TVLLLTPMLLYITRRMGV-----  
-----DPVPYLLAEIFASNIGGTATLIGDPPNIMIASAA-----KLSFNEFIMNMT-PIAFLDLFIMVALIYLFYRR-----  
-----EFKNVEYHVDGIMNLRREEAIRDKQLFRKSVVTIAFVVLAFFLHDTIG-----  
-----IE-PAVVALTGASILLWS-----RVPP-EVALE-KVEWATLFFFGLFIIVGGLVETGLIEDVVGKWIVS  
HISS-----ENEAILMISWVSFAFLSAIIIDNIPFTATMIPLIKSMGGSI-----NVYPLWWALSGLGACLGNGTAIGASA  
NVVVLGIAYREGIR-ITFIDFLKVGMIIMLLTVGAGSLVLIARYGGGIL-----</seq-data>

</sequence>

<sequence seq-type="Protein">

<seq-name>Q9X032</seq-name>

<seq-info><length>1375</length></seq-info>

<seq-data>-----  
-----  
-----

-----MFEDAVVSLLIIVYLFIIIE--KHHRAVIT  
MLGGSAAFLVFKDP-----IEALVRYVDFNTIFLLIGMMIFVSVTKRSGLFHFLGLYSVKLSGGNVFLFFIAINTLVAL  
LSSFL-DNVT-TILVFPVTLVVCDTVLD-----  
-----DPVPFVISEIISSNIGGTATMIGDPPNIMIASAA-----KLHFLDFVNVVA-PAAVLTIVTLIFLSAVYRR-----  
-----VIFRKIPVEVVKDFDPRRAIVDKKLFYLSIILTLVVLVLFSLQKPLG-----  
---LESFEVALLAGFLSLAFLK-----KKDI-EDVFK-EIEWGVIFFFIGLFLVVGALVLEAGVLERISELVIRLSK GK---  
-MESTLISVLGISGLSSAFVDNIPFTATMIPVIKLAFLAPETFS-----DLRPLWWALSGLGACFGGNGTLIGASANVVGT  
SLI-ADRKH-ITFWYFKIGFPVLILSLLVSGVYLLIRY-----</seq-data>



```
</sequence>
<sequence seq-type="Protein">
<seq-name>Q9X0D5</seq-name>
<seq-info><length>1375</length></seq-info>
<seq-data>-----
-----
-----
-----MNEAMLVLLFAILAYYFIIF-GKIAKSVV
LLIALVLMIAKVVVEGLD-----LKNIGEVDVFNLTGLLLGMMIIVHILKGTGFFEYLAISSAISRGRFWLLFAFLMVL
TAVTSAFL-DNLI-TIILVSPILFLILDTEV-----
-----NPVPFFLFTIFIDNIGGMSTLIGSPLNIVLGSIS-----GLSFNDFLKNMG-LVTVLMFVVVFFLFKRYVRI-----
-----
-----DEKAFEKLRNLLSVDPKRSITDPVVLKKSFLVFLSTLVLFGLHSFVE-----
----VE-LSLIALIAACALLML-----GKNF-EKVSE-GIDWDTLFFYTGLFIISYSLEQIGVMEVIASFLKALSFN---
---RFLFVATVTWISILSTAFLSAVPATLIIAPTILKILVSQG-----FPASLWWVYAVGANLGTNLTPLGAVQNVGLSL
LEKYTKHTVSFKEFFKVAWSFMFIPFIIATLYSLIY-----</seq-data>
```

```
</sequence>
<sequence seq-type="Protein">
<seq-name>O27976</seq-name>
<seq-info><length>1375</length></seq-info>
<seq-data>-----
-----
-----
-----MIELLISILTYALISLQSFYR--KMDRPAAS
TIGAALMLAFGVMS-----LKEAVRAIDYNTIMLLFGMMVLTAYLGIAGFFDWLASKIMGFS-GNGKRLFTIVFSS
GFLSALF-VNDT-ICVFMTPVVVRVALSAGI-----
-----SPIPLLIALATSANVGSVAVTIIGNPQNMLIGLKS-----GIGFVQFTAKML-PVGVAGIFIVYSVIYVLYRG-----
-----
-----ELGKLRNGKIEVNLNRRRLAAKGLLTFALVLILFVTEFY-----
-----PVSLSAFIGAAIMFAIG-----GVK-P-REALE-KVDWGLLLFCNLFIVMHGFEKS-YGEKILSMLSFGE---
----SFADYLYFSLTLVAGSNLVSNPVMMVLPAAKGAAAD-----FWLILAMASTFAGNLTIGSVANLIVA
ESAERHGVH-LSFFEYLKAGVPVTFATVLVGALLIYIT-----</seq-data>
```

```
</sequence>
<sequence seq-type="Protein">
<seq-name>Y753_SYNY3</seq-name>
<seq-info><length>1375</length></seq-info>
<seq-data>-----
-----
-----
-----MVANLPALFSLGVFVGVILLIMSE--KIHLTI
AAFLGALILVFTHVITLK-----EGIDYISQSYATLALFFGVMVLVRSFEPTKIFEYLATQMVLLAKGSGKLLMLGVIAIT
TPICAVL-PNAT-TVMLLAPLIPPLAQEIGV-----
```

-----DFVPILILMVFVANSAGLLTLVGDPATFIVGDAI-----NISFNDYLFKLS-FMGVLAIVSIVVITPFLFRH-----  
-----IWRSRFTHLEDLPHPQINHPKVLMMAGGVIIITLVLIFFVIGESLP-----  
----VPIPPASVALMGACLALLLA-----SQSKIDTV-HNILR-DVDWSTLIFFMSIFVIIGSLEKTGVTASLAQLLAVV  
VGQN----IAFGAIVLVFTVGLLSSVVPNIPLVVAMVPLKQYVVNIGFAGPEILGANFDGQLPAEVLPLFYAMMFGATLGG  
NGTLVGASSNIVAAGISEQHGRP-ISFHRFLRYGLPVMQVVAALFVAWLMFTQQG-----</s

eq-data>

</sequence>

<sequence seq-type="Protein">

<seq-name>YOJA\_BACSU</seq-name>

<seq-info><length>1375</length></seq-info>

<seq-data>-----

-----MPILIVAVGVLLILLFLIIK-VKLNTFVSLI  
VVSFLVAIGLGMDIN-----KIVLSIETGIGGQLGHLALVFGLGAMLGRLVSDAGGGYRIAITLIDKFGRKRIQAAVVVASF  
IGIALFF-EV---GLVLLIPIVYAIKEL-----  
-----KMPFLYLGIPMAAALNVTHGFL--PPHPAPTAISVAY-----GAHIGQVLLFGI-IIAVPTTVIAGPLFNKFAMKRFPGAY  
QKHG-----

-----NLSGLGPRKEFQLDETP-GFAISAVTSLFPVIFMAMATIFSLLLSEHSGKGDII  
-----EFIGTPGTAMLISLLLALYTMGYARKISMQ-----EIGRS-ISESI-SQIAMMLLIIGGGGAFKQVLIDGG  
VG DYVADFFRQT-----NMSPLFVAWTIAAVLRLCLGSATVAALT TAGMAAPLMEAGSV-----NPALMVLATG  
AGSVIACHVNDAGFWMVKEFFGLSM---KETFQWTLLTTVLSVTGLGCVLLAGLVM-----

</seq-data>

</sequence>

<sequence seq-type="Protein">

<seq-name>DSDX\_ECOLI</seq-name>

<seq-info><length>1375</length></seq-info>

<seq-data>-----

-----MHSQIWWVSTLLISIVLIVLTIVK-FKFHPFL  
ALLLASFFVGTMMGMGPL-----DMVNAIESGIGGTLGFLAAVIGLGTILGKMMMEVSGAAERIGLTLQRCR-WLSVDVI  
MVLVGLICGITLVF-EV---GVVLLIPLAFSIAKKT-----  
-----NTSLLKLAIPLCTALMAVHCVV--PPHPAALYVANKL-----GADIGSVIVYGL-LVGLMASLIGGPLFLKFLG  
QRLP----FKP-----

-----VPTEFADLKVRDEKTLPL-SLGATLFTILLPIALMLVKTIAELNMARES  
GLYILV-----EFIGNPITAMFIAVFVAYYVLGIRQHMSMG-----TMLTH-TENGF-GSIANILLIIGAGGAFN  
AILKSSSLADTLAVILSNM-----HMHPILLAWLVALILHAAVGSATVAMMGATAIVAPMLPLYPDI-----SPEIIAI  
AIGSGAIGCTIVTDSLFWLVKQYCGATL---NETFKYTTATFIASVVALAGTFLLSFII-----</s

eq-data>

</sequence>

```
<sequence seq-type="Protein">
<seq-name>GNTT_ECOLI</seq-name>
<seq-info><length>1375</length></seq-info>
<seq-data>-----
-----
-----
-----MPLVIVAIGVILLLLLMIR-FKMNGFIA
LVLVALAVGLMQGMPLD-----KVIGSIKAGVAD-VGSLALIMGFGAMLGKMLADCGGAQRIATTLIAKFGKKHIQWA
VVLTGFTVGFALFY-EV--GFVLMPLVFTIAASA-----
-----NIPLLYVGVPMMAAALSVTHGFL--PPHPGPTAIATIF-----NADMGKTLLYGT-ILAIPTVILAGPVYARVL
KGID-----KP-----
-----IPEGLYSAKTFSEEEMP-SFGVSVWTSVLPVVLMMAMRAIAEMILPK
GHAFLPVA-----EFLGDPVMATLIAVLIAMFTFGLNRGRSMD-----QINDT-LVSSI-KIIAMMLLIIGGGG
AFKQVLVDSGVDKYIASMMHET-----NISPLLMAWSIAAVLRIALGSATVAAITAGGIAAPLIATTGV-----SPEL
MVIAVGSGSVIFSHVNDPGFWLFKEYFNLTI---GETIKWSMLETIISVCGLVGCLLNMVI-----
----</seq-data>
```

```
</sequence>
<sequence seq-type="Protein">
<seq-name>Gntp_ECOLI</seq-name>
<seq-info><length>1375</length></seq-info>
<seq-data>-----
-----
-----
-----MHVNLNLWVVFGLMLVNLK-FKINS
MVALLVAALSVGMLAGMDLM-----SLLHTMKAGFGNTLGALAIIVVFGAVIGKLMVDSGAAHQIAHTLLARLGLRYV
QLSVIIIGLIFGLAMFY-EV--AFIMLAPLVIVIAAEA-----
-----KIPFLKLAIPAVAAATTAHSLF--PPQGPVALVNAY-----GADMGMVYIYGV-LVTIPSVICAGLILPKF
LGNLE-----RP-----
-----TPSFLKADQPVDMMNLP-SFGVSILVPLIPAIIMISTTIANIWLKVD
TPAWEVV-----NFIGSSPIAMFIAMVFAVFLGTARGHDMQ-----WVMNA-FESAV-KSIAMVILIIGAG
GVLKQTIIDTIGDITIGMLMSHG-----NISPYIMAWLITVLIRLATGQGVVSAMTAAGIISAAILD PATGQLVGV-----
NPALLVLATAAGSNTLTHINDASFWLFKGYFDLSV---KDTLKTWGLELVNSVVGLIIVLIISMVA-----
-----</seq-data>
```

```
</sequence>
<sequence seq-type="Protein">
<seq-name>GNTU_ECOLI</seq-name>
<seq-info><length>1375</length></seq-info>
<seq-data>-----
-----
-----
-----MTTLTLVLTAVGSVLLLLFLVMK-ARMHA
FLALMVVSMGAGLFSGMPLD-----KIAATMEKGMGGTLGFLAVVVALGAMFGKILHETGAVDQIAVKMLKSFSGHSR
```

AHYAIGLAGLVCALPLFF-EV---AIVLLISVAFSMARHT-----  
-----GTNLVKLVIPLFAGVAAAAAFL--VPGPAPMLLASQM-----NADFGWMILIGL-CAAIPGMIIAGP  
LWGNFISRYVE----LH-----  
-----IP-DDISEPHLGEGKMP-SFGFSLSLILLPLVLVGLKTIARF  
VPEGSTAYEWF-----EFIGHPFTAILVACLVAIYGLAMRQGMPKD-----KVMEI-CGHAL-QPAGIILLVIG  
AGGVFKQVLVDSGVGPALGEALTGM-----GLPIAITCFVLA-AAVRIIQGSATVACLTAVGLVMPVIEQLNYSGA-----  
--QMAALSICIAGGSIVVSHVNDAGFWLFGKFTGATE---AETLKTWTMMETILGTVGAIVGMIAFQLLS-----  
-----</seq-data>

</sequence>

<sequence seq-type="Protein">

<seq-name>O26881</seq-name>

<seq-info><length>1375</length></seq-info>

<seq-data>-----  
-----  
-----

-----MALAVYLVPLPGLRA-----SGHAALALLVFAVTMWATE  
--AVPLAVTSLIILFAQPLIGVES-----FENAVIGFANPILFLMIGGFIMAEAIRKSGLAQRFTYYLLGRLGTSPERGLF  
VSIFSTGLLSAWI-ENVV-AFAMLLPIIKEIVDIMGCSEPEKGS-----  
-----NYAKAMILGASFGSLAGGFGTEIGTAPNLMAAAYS-----IPFLNWMIFGL-PLSIAMLLVTWFL  
LMRIFP-----  
-----SEVRALENGDALIGERIRMMG-SMSRDEKLSAGILLFAILLWVTA--  
-----GFTGINSYSVSLIAAVMFIFA-----GVITW-KDAQK-NIDWGLVVFVGGALSLSGSAL  
LKTGAAAWIIDKLVGMLGS---DPSTVIVMLVLMMAVAVIITQVMSNIALSAILVPLSVTLASAQHQ-----PIGVYAVP  
VAIACSLSFMLPMADPTVAMAYGSG-----YVKLRDIPRAGIPIAVGIILTVLVITTLAAPFIS-----</  
seq-data>

</sequence>

<sequence seq-type="Protein">

<seq-name>YFBS\_ECOLI</seq-name>

<seq-info><length>1375</length></seq-info>

<seq-data>-----  
-----  
-----

-----MNGELIWVLSLLAVAVILFATG--RVRM  
DAVALFVIVAFALSGTLT-----VPEVFSGFSDPNVVLIAALFIIGDGLVRTGVATVMGTWLVKVAGNSEIKMLVLL  
MLTVAGLGAFM-SSTG-VVAIFIPVVLVSVAMRMQT-----  
-----SPSRLMMPLSFAGLISGMMTLVATPPNLVNSELLREG-----YHGFSFFSVTPI-GLVVLVLGILYMLV  
MRFMLKGDTQTPQREGWTRRTRFRDLIREYRLTGRARRLAIRPGSPMIGQRLDDKLRERYGANVIGVERWRRFRRVIVNV  
NGVSEFRARDVLLIDMSAADVDLRQFCSEQLLEPMVL-----RGEYFSDQALDVGMAEISLIPESELIGKSVREIGFRTRYGL  
NVVGLKRNGVALEGLADEPLLLGDIIILVVGNNWKLIGMLAKQGRDFVALNLPEE-VSEASPAHSQAPHAIFCLVLMVALML  
T-----DEIPNPVAAIIACLLMGKF-----RCIDA-ESAYK-SIHWPSIILVGMMPFAVALQ  
KTGGVALAVKGLMDIGGG---YGPHMMLGCLFVLSAVIGLFIISNTATAVLMAPIALAAAKTMGV-----SPYPFA  
MVVAMAASAAFMTVPVSSPVNTLVLPVPG-----NYSFSDFVKLGVPTIIVMAVCVVMIPMLFPF-----





LPPFEAGVKGTRVVMFALLASTSVLIVVFLPVVFLK---GVLGTFLKN--FALTIIAIGLSYLVAITFTPSATVRLITQRPREN-----  
-----FFMKLYKRFEGSFDKALRFSLDHKFIVLLSFFFVGLS  
VYLF-PKVKKEFVPHVDEGRFMVRMRMPVGTSEFRVKEKAKEVERILLK---NPHIAKVGMVVGEGVGG----AGVHSGLFF  
VYLKERSQRPH-----QMVVMSEVRRELEASE-----LKNVKVSVEPPHGIGASAGRTTDLQYIVRGERIEVL  
KKIAKSMEEHF-SNVE-GFRD----VDTSELSAPYVKISVKREKLSHLGVSVEDLGLTSLLF---GKYRVGTyelG--SESYDFYIKA  
EEDFVKEIHNLNRVYIRARNGE-----LIPITELIDFSIEAGPFLTRYNRQYSVFYANL---EGIDLATARSLVEDWLKKN-----  
-----LPGYTYDTAGRVKEFK-KAFSGFVLSLAMSIGVYMILASLFESLKHPTVLLMVPLSALGVFGFMYLT-----DTSL  
NVSSYFGIILLVGIIVRDAVLFIERIQLRK-----EGYAVREAILEARRERLRPILMTTITVVSALLPVAL-GLTAGSEQRKPLAI  
AVIGGIASGLPLSLFLLPVLYELMEWKRK-----</seq-data>

</sequence>

<sequence seq-type="Protein">

<seq-name>O68962</seq-name>

<seq-info><length>1374</length></seq-info>

<seq-data>-----MYKTAINRPITTLMFALAIVFFGTMGFKKLSVALFPKIDLPTVVVTTTYPGASAEIIES  
KVTDKIEEAVMG-IDGIKKVTSTS-SKNVSIVVIEFELEKPNEEALNDVVKISSV-RFDDSNIK-KPSINKFDTDSQAIISLFVSSS  
S-----VPATTLN-DYAKNTIKPMLQKINGVGGVQLNGFRERQIRIYADPTLMNKYNLTYADLFSTLK  
AENVEIDGGRIVN-----SQRELSILINANSYSVADVEKIQV-----GNHVRLGDIKIEIG---  
-----LEEDNTFASFkdK-----PGVILEIQKIAGANEIEIVDRVYEALKHIQ--AISPR-YEIRPFLDTSYIRTSIEDVKFDLILGAILAV  
LVVFAFLRNGTITLVSAISIPISIMGTFALIQWGMGFSLNMLTMVALTLAIGIIIDDAIVVIENIHKKL-----EMGMNKRKA  
SYEGVREIGFALVAISAMLLSVFVPIGNMK---GIIGRFFQS--FGITVALAIALSYVVVVTIIPMVSSVVNPR-----  
-----HSRFYVWSEPFKALESRYRLLQWVLNHLKLIISIAVVLVFGSLF  
VA-SKLGMEFMLKEDRGRFLVWLKAKPGVSDYMTQKSKIFQKAIEK---HAEVEFTTLQVGYGTT-----QNPFKAKIFVQLK  
PLKERKK-----ESELGQFELMSALRKELKS-----MPEAKGLDTINLSEVSLGGGGDSSPFQTFVFSHSQEAVD  
KSVANLKKFL-LESP-ELKGKIEGYHTSTSESQPQLQLKILRQNANKYGVSAQTIGAVVSSAF--SGTSQASVFKED--GKEYDMI  
IRVPDDKRVSVEDIKRLQVRNKYDK----LMFLDALVEITETKSPSSISRYNRQSVTVLAQP--KAGISLGEILTQVSKNTKEW-  
-----LVEGANYRFTGEADNAK-ETNGEFLVALATAFVLIYMILAALYESILEPFIIMVMTMPLSFGAFFALGLV-----  
--HQPLSMFSMIGLILLIGMVGKNATLLIDVANEERK-----KGLNIQEAILFAGKTRLRPILMTTIAMVCGMLPLAL-ASG  
DGAAMKSPIGIAMSGGLMISMVLSLLIVPVFYRLLAPIDDKIKRFYQNKALE-----</seq-data>

</sequence>

<sequence seq-type="Protein">

<seq-name>O25328</seq-name>

<seq-info><length>1374</length></seq-info>

<seq-data>-----MYKTAINRPITTLMFALAIVFFGTMGFKKLSVALFPKIDLPTVVVTTTYPGASAEIIES  
KVTDKIEEAVMG-IDGIKKVTSTS-SKNVSIVVIEFELEKPNEEALNDVVKISSV-RFDDSNIK-KPSINKFDTDSQAIISLFVSSS  
S-----VPATTLN-DYAKNTIKPMLQKINGVGGVQLNGFRERQIRIYANPTLMNKYNLTYADLFSTLK  
AENVEIDGGRIVN-----SQREFSILINANSYSVADVEKIQV-----GNHVRLGDIKIEIG---  
-----LEEDNTFASFkdK-----PGVILEIQKIAGANEIEIVDRVYEALKRIQ--AISPN-YEIRPFLDTTGYIRTSIEDVKFDLVLGAILA  
VLVFAFLRNGTITLVSAISIPISIMGTFALIQWGMGFSLNMLTMVALTLAIGIIIDDAIVVIENIHKKL-----EMGMskRK  
ASYEGVREIGFALVAISAMLLSVFVPIGNMK---GIIGRFFQS--FGITVALAIALSYVVVVTIIPMVSSVVNPR-----  
-----HSRFYVWSEPFKALESRYTKLLQWVLNHLKIIISIAVVLVFGSLF  
VA-SKIGMEFMLKEDRGRFLVWLKAKPGVSDYMTQKSKIFQKAIEK---HAEVEFTTLQVGYGTT-----QNPFKAKIFVQLKP  
LKERKK-----EHQLGQFELMSVLRKELRS-----LPEAKGLDTINLSEVTLIGGGGDSSPFQTFVFSHSQEAVDKS

VENLKKFL-LESP-ELKGKVESYHTSTSESQPQLQLKILRQNANKYGVSAQTIGSVVSSAF--SGTSQASVFKED--GKEYDMIIR  
VPDDKRVSVEDIKRLQVRNKYDK-----LMFLDALVEITETKSPSSISRYNRQRSVTVLAEPNRNAGVSLGEILTQVSKNTKEW-  
-----LVEGANRFTGEADNAK-ESNGEFLVALATAFVLIYMILAALYESILEPFIIMVMTPLSFGAFFALGLV-----  
--HQPLSMFSMIGLILLIGMVGKNATLLIDVANEERK-----KGLNIQEAILFAGKTRLRPILMTTIAMVCGMLPLAL-ASG  
DGAAMKSPIGIAMSGGLMISMVLSLLIVPVFYRLLAPIDDKIKRFYQNQKTLE-----</seq-data>

</sequence>

<sequence seq-type="Protein">

<seq-name>YEGO\_ECOLI</seq-name>

<seq-info><length>1374</length></seq-info>

<seq-data>-----MKFFALFIYRPVATILLSVAITLCGILGFRMLPVAPLPQVDFPVIIVSASLPGASPETMA  
SSVATPLERSLGR-IAGVSEMTSSS-SLGSTRILQDFDRDINGAARDVQAAINAAQSLLPSGMPSRPTYRKANPSDAPIMIL  
TLTSDT-----YSQGELY-DFASTQLAPTISQIDGVGDVDVGGSSLPVVRVGLNPQALFNQGVSLDD  
VRTAVSNANVRKPQGALED-----GTHRWQIQTNDELKTA AEYQPLIHH-----YNNGGAVRL  
GDVATVTDS-----VQDVRNAGMTNAK-----PAILLMIRKLPEANIIQTVDSIRAKLPELQ--ETIPAAIDLQIAQDRSPTIRA  
SLEEVEQTLIISVALVILVVFLRSGRATIIPAVSVPVSLIGTFAAMYLCGFLNNLSLMALTIATGFVVDDAIVVLENIARHL---  
-----EAGMKPLQAALQGTREVGFTVLSMSLSLVAVFLPLLLMG---GLPGRLRE--FAVTLVAIGISLLVSLTLTPMMCG  
WMLKAS-----KPREQKRLRGFRMLVALQQGYGKSLK  
WVLNHTRLVGVVLLGTIALNIWLY-ISIPKTFPEQDTGVLMMGGIQADQSFQAMRGKLQDFMKIIRD---DPAVDNVTGFT  
GGSRV-----NSGMMFITLKRDERSE-----TAQQIIDRLRVKLAK-----EPGANLFLMAVQDIRVGGGRQ  
SNASYQYT--LLSDDLAALREWEPKIRKKL-ATLP-ELAD----VNSDQQDNGAEMNLVYDRDTMARLGIDVQAANSLLNNAF  
---GQRQISTIQP--MNQYKVVMEVDPRYTQDISALEKMFVINNEGK-----AIPLSYFAKWQPANAPLSVNHQGLSAASTISF  
NL--PTGKSLSDASAAIDRAMTQL-----GVPSTVRGSFAGTAQVFQ-ETMNSQVILIIAAIATVYIVL GILYESYVHPLTI  
LSTLPSAGVGALLALELF-----NAPFSLIALIGIMLLIGIVKKNAIMMVDFALEAQRH-----GNLTPQEAI FQA CLLRF  
RPIMMTTLAALFGALPLVL-SGGDGSELRQPLGITIVGGLVMSQLLTYTTPVVYLFFDRLRLRFSRKPQKTVTE-----  
---</seq-data>

</sequence>

<sequence seq-type="Protein">

<seq-name>YEGN\_ECOLI</seq-name>

<seq-info><length>1374</length></seq-info>

<seq-data>-----MQVLPPSSTGGPSRLFIMRPVATTLLMVAILLAGIIGYRALPVSALPEVDYPTIQVVTLYPGAS  
PDVMTSAVTAPLERQFGQ-MSGLKQMSSQS-SGGASVITLQFQLTLPLDVAEQEVQAAINAATNLLPSDLNPPVYKVN  
ADPPIMTLAVTSTA-----MPMTQVE-DMVETRVAQKISQISGVGLVTLSSGGQRPVVRVKLNAQAI  
AALGLTSETVRTAITGANVNSAKGSLDG-----PSRAVTL SANDQM QSAEYRQLIIA-----Y  
QNGAPIRLGDVATVEQG-----AENSWLGAWANKE-----QAIVMNVRQRPGANIISTADSIRQMLPQLT--ESLPKSVK  
VTVLSDRRTNIRASVDDTQFELMMAIALVVMIIYFLRNIPATIIPGVAVPLSLIGTFAVMVFLDFSINNLTLMALTIATGFVV  
DDAIVVIENISRYI-----EKGEKPLAAALKGAGEIGFTIISLTFSLIAVLIPLLFMG---DIVGRLFRE--FAITLAVAILISAVVSL  
TLTPMMCARMLSQE-----SLRKQNRFSRASEKMFDRIIA  
AYGRGLAKVLNHPWLTL SVALSTLLLSVLLW-VFIPKGFPPVQDNGIIGTLQAPQSSSFANMAQRQRQVADVILQ---DPA  
VQSLTSFVGVGDG-----TNPSLNSARLQINLKPLDERDD-----RVQKVIARLQTAVDK-----VPGVDLFLQPT  
QDLTIDTQVSRTQYQFT--LQATSLDALSTWVPQLMEKL-QQLP-QLSD----VSSDWQDKGLVAYVNVDRDSASRLGISMA  
DVDNALYNAF---GQRLISTIYTQ--ANQYRVVLEHNTENTPGLAALDTIRLTSSDGG-----VVPLSSIAKIEQR FAPLSINHLDQF  
PVTTISFNV--PDNYSLGDAVQAIMDTEKTL-----NLPVDITTQFQGSTLAFQ-SALGSTVWLIVA AVVAMYIVLGILY



ESFIHPITILSTLPTAGV GALLALLIA-----GSELDVIAIIGIILLIGIVKKNAIMMIDFALAAERE-----QGMSPREAIYQA  
CLLRF RPILMTT LAALLGALPLML-STGVGAELRRPLGIGMVGGLIVSQVLT LFTTPVIYLLFDRLALWTKSRFARHEEEA-----  
-----</seq-data>

</sequence>

<sequence seq-type="Protein">

<seq-name>y895\_haein</seq-name>

<seq-info><length>1374</length></seq-info>

<seq-data>-----MYEEIRMKFTDIFIRRPVLAVSISLLMIILGLQAISKLAVREYPKMTTTVITVSTAYPGADANLI  
QAFVTSKLEESIAQ-ADNIDYMSSTS-APSSSTITIKMKLNTDPAGALADVLAKVNAVKSALPNGIE-DPSVS-SSSGGSGIMYI  
SFRSKK-----LDSSQVT-DYINRVVKPQFFTIEGVAEVQVFGAAEYALRIWLDPQKMAAQNSLVPT  
VMSALSANNVQTAAGNDNG-----YYVSYRNKVETTTKSVEQLSNLIIS-----SNGDDLVR LR  
DIATVELN-----KENDNSRATANGA-----ESVVLAINPTSTANPLTVAEKIRPLYESIK--TQLPDSMESDILYDR TIAINSSIH  
EVIKTIGEATLIVLVVILMFIGSFRAILIPILAIPISLIGVLMQLSFNFSINLMTLLALILAIGLVVDDAIVVLENIDRHI-----K  
AGETPFRAAIIGTREIAVPVISMTIALIAVYSPMALMG---GITGTLFKE--FALTLAGAVFISGVVALT LSPMMSSKLLKSN-----  
-----AKPTWMEERVEHTLGKVN RVY EYMLDLVMLNRKSM  
LAFAVVIFSTLPFLF-NSLSSELPNEDKGAFIAIGNAPSSVNVDYIQNAMQP YMKNVME---TPEVSF-----GMSIAG----APT  
SNSSLNIITLKDWKERSR-----KQSAIMNEINEKAKS-----IPEVSVSAFNIPEIDTGEQGPVSIVLK---TAQ  
DYKSLANTA EKFLSAM-KASG-KFIY---TNLDLTYDTAQMTISVDKEKAGTYGITMQQISNTLGSFL---SGATVTRVDVD--G  
RAYKVISQVKRDDRLSPESFQNYLTASNGQ-----SVPLSSVISMKLETQPTSLPRFSQLNSAEISAVP--MPGISSGDAIAWLQ  
QQATDN-----LPQGYTFDFKSEARQLV-QEGNALAVTFALAVIIIFLVLAIQFESIRDPMVIMISVPLAVSGALVSLNI  
LSFFSIA-----GTTLNIYSQVGLITLVGLITKHGILMCEVAKEEQLN-----HGKTRIEAITHAAKVR LRPI LMTTAA MVAGLIP  
LLY-ATGAGAVSRFSIGIVIVAGLSIGTIFTLFVLPVVYSYVATEHKPLPVFDENKTT H-----</seq-data>

</sequence>

<sequence seq-type="Protein">

<seq-name>Q9ZDZ3</seq-name>

<seq-info><length>1374</length></seq-info>

<seq-data>-----MLLSTICIKRPIFAIVLSLMIVALGGIFFTKLQIRGAPDISVPIINVEAHYAGADALYMEQ  
EITTRIEKVLKT-VKNLDYITSQS-STGSSSITLSFRLSTDIELALNDVRSKISDISYMFQDMK-APSVTKLDTDNFPSLFISIESDQ  
-----YSDLELT-QIVSDNIQAQLDKLESV GKSQIYGGREYIMRIE PDKKLYQYKISLLEIEAAI KEQNK  
DYPAGMIKT-----KSNNFIVTLTGSLSAPEEFGNIILK-----VQNGCIIKLRDITKISLT-----  
SPDEDIIFRYNGK-----NSIALGLIKESKANIIDLSNEVTKELERIK--ASIPKGISISIA YDGAKPLKASIYAVFKTMFEALILVVLV TY  
LFLASAKISLIPFVTIPVSLIGTFSIMYAFGFSIN VFTLLAMILAIGLVVDDAIVMLENIFRYN-----EMGYKPM EAAMLA  
SKEIGFAITMTITLAAVFVPIGFIE---GFIGKLFIE--FAWTLAFCVLFSGFVAVTLTPMMS SHMVT KH-----  
-----NTNLAKFLVRFHDM LQFVQNRYYLKLALDNKKKFVIII LSSFIVLIISF-KLT  
KKTFFVPQEDDGFLQVFLKGPEGASLESSIKVVKEAEQILAN---YKDIFGYLMVIGVG-----GSENVFGFIPLK DWSARSR---  
-----SQKTIKNMLNKQFSK-----IPGMSVFAMEPRSMISVNATSPIEFTIQ---TNLEYKDLDKISQQFIDIM-R  
ANP-IFLN----VNRNLQSAMPTINIEVNRDKAYLYGMDLANIGKTLQYLI---AGQQIGAFR MG--NNLYNVILQFNQKDRQD  
ISDLSKILIRTKNNN----MLPLESIANIREKISLKSYYHYNN SKSVTISSDL--APDVKINDAINIINKIAAQL-----LDPNN  
TII EYIGEIKQMK-EVDNNILITFVFSLVFIYLV LAAQFESFTDPLLILLAVPFSITGGGLTLWLA-----GNSLNMYSNIGLITL  
IGLVTKNAIMIVEFANQLRA-----KGLNVREAIIESSKLR LRPI LMTTVA AIVGALPLVF-ADGAGAASRNSIGFVIVGGLSI  
GTIFTIFAIPVIYQTFKKD-----</seq-data>

</sequence>

<sequence seq-type="Protein">  
<seq-name>p73998</seq-name>  
<seq-info><length>1374</length></seq-info>  
<seq-data>-----MFVDFFIKRPVFSSVCAIILLVGTISIFSLPIAQFPEVAPTTIQVSSNYSGANAEVVERA  
VTDILERQING-VQGMRYISSTSSNDGTSSITVTFDRSQNKDIAAVDVQNRVALAEPQLPEAVR-RTGIRVNKESNALLGIGI  
TSPDG-----EYDNVFLS-NYADRYLVDPIRRLEGVGDVRFGERLYAMRLWVDPMKLAAQQLTMAD  
LSRALQEQLQVGAGQIGAEPAPPGQEYQLDLLASSQLVEVKDFEDLIVK-----SGASGSVV  
RFKDIGRVELG-----AQNYNSFLRFRGD----EAVGLGIYQLLDSNALEVARLVKDEMARLA--QNFPEGIEYSVAFDTTE  
FVQESLSEVVETLLIAVVLVILVILVFLQDWRSALIPALTIPLALIGTFAFVKVFNFSINSLTLFGLTLATGLVVDDAIIVVEQISRFI  
K-----VKHEDPQEAQAQAMGELTGAVIATSLVLMMAVFIPVAFFP---GTTGALYQQ--FALTIAFSILLSTFLALTLTPSLCA  
LLLREGQEP-----PAFIA-GFFNWFNRVLDIINKNGYGNVLGK  
LVNLRRAWVIGVFVLLGATAWLY-VTVPTAFLPEEDQGYFITIIQAPQGVSLQYTSRVMAQVEKELLA---VPEVTATFAVGG  
FSFSG----NSPNQGIIFTRLKPGWERTA-----PNQSVQAIIGQMFGKFSQ-----IPEANIIPINPPPIRGLGQF  
GGFDFQLQDLRVNSELDTMVGTMGEILGAA-NQNP-ALTR----VFSTFQANNPQLIVNVNRNKAKSLGVPVDQIFQTMET  
AL---GSSYVNDVFLQ--GRTYRVYLQADEQFRSSPEDINSLYVRSESGT----MIPMANLVTVTQGVGAPIITHYNLFRSIAITG  
SA--NFGVSTGQAMNAMAARIQV-----MPPGFDFQWSGISLEEM-GSQGQAPLIFGLLFLVFLVLAQYENYI  
DPVIILLSVPLAILGALTAQSLR-----GFPNDVYQCIGLVMLIGLSSKNAILIVEFANQLRA-----EGYPIAKAALEASK  
DRLRPILMTALSTLFGIFPLAI-ATGAGAGSRQALGTAVFGGMLVATFLSLFVVPVLYIVVKTISGRLLAPKSTNPEPSPEIESHT  
PAPASQRNS-</seq-data>  
</sequence>

<sequence seq-type="Protein">  
<seq-name>q55584</seq-name>  
<seq-info><length>1374</length></seq-info>  
<seq-data>-----MLLSISNVFIKPNVLTTVCTIVIILLGAIALPLLPLAKLPDMPKQVQVTTNYVGSDAQTA  
VDNVTTVLERQING-TEQVIYMNSTTDNTGTSTINVYFPVEMDRNIAQVLVQNNVAIAASSLPEVVN-RQGVTTQTQSPSV  
TIAYGVYSEND-----QGKPIYDDIFVS-NFVDRVLLDEIKRIDGVGSAILIGASEYAMRFWLDPDALAARD  
LTAADVNTAIRSQNIQVGVGGVNLPPVTDQQRQINARALSRFTTPEAEQIVVK-----VGD  
DGTLIRIKDVGRATIG-----TQNYIQTALFNNA----PAVAFVIYQLPGTNAALDTANMVKEKMAELR--PLFPPGLNAEVA  
LDNTLFVTASLEEAALTLIEAILLVILVIFLQNWRTTLPALAIPVSLIGAMAFALAFGFSLNQLTLFGVILATGLVVDDGILVVE  
AIEVKL-----DQGMKPFQAALDAMGELTGAVISTSLVLMMAVFIPVTFPP---GTTGIVYKQ--FAVIMASAVAVSTFNAI  
SFSPSMSAILMRPKKEVH-----GPLAWFFNLFNRTFDWLK  
ERYGNIITAILKVRLLAIPIFIGSLILTVIVY-NITPTGFIPEEDQGYFFMLGNPAGVSIETYKDVISQATEIVSA---RPEVEHVLG  
MGGFSFLG----NDSSKSLFFVKLNWDERPG-----QKGSVFGLLAEINRELAQ-----KIPDAQVFAVNAPPV  
DGLSSTGGLDFYIQN-RGGMPLENFLDYVQQYMEKL-RQEP-ALNPRT--VFTQFTFNAPLLEIGVDREKANAQNVLDISEVF  
NTIGIYM---GSSYINQFVME--SRLYQVYAMADGQFRSNPRDIGRLYVRSRTGA----LVQLSNLIDVKQTTYPPIITNFNIYP  
AVDVQASP--AAGYSTGQAMATMERLSKEM-----FPDSIGYAWYGTGYEEL-QSAGAAPIIFGLAFIMVFLVLSAQ  
YESYVDPAIIMMTVPLAILGAIGAILLRANFMVATNMVWPTVNNNVYAQVALVMLIGLASKNAILIVEFGNQAMD-----  
--LGMKIPQAAAFAAKERM RPILMTAISGLVGFVPLVI-ASGAGAMSRWSLGTAFGGYLISTILSLFLVPVLYTLVKEAEARF  
LKGEKGEKGSNPPPPSGEDNGEPVNNPS</seq-data>  
</sequence>

<sequence seq-type="Protein">  
<seq-name>p95422</seq-name>

<seq-info><length>1374</length></seq-info>  
<seq-data>-----MNFSQFFIQRPIFAAVLSLLILIGGAISLFQLPISEYPEVVPPTVVVRANFPGANPKVIGE  
TVASPLEQAITG-VENMLYMSSQSTSDGKLTITFALGTDLDNAQVQVQNRVTRTEPKLPEEVT-RLGITVDKASPDLMV  
VHLTSPDN-----RYDMLYLS-NYAVLNKDELARLDGVDVQLFGLGDYSLRVWLDPNKVASRNL  
ATDVVNAIREQNRQVAAGTLGAPPAPNDTIFQLSINTQGRLVTEEEFENIIIR-----AGANGEI  
TRLRDIARVELG-----SNQYALRSLNKNK----PAVAIPIFQRPGSNAIEISNLVREKMAELK--HSFPQGM  
DYSIVYDPTIF  
VRGSIEAVVHTLFEALVVLVVLVILFLQWRASIPLAAVPVSLIGTFVVMHMLGFSNLALSFLGLVLAIGIVVDDAIV  
VENV  
ERNI-----GLGLKPVEATKRAMREVTGPIIATALVLCVFIPTAFIS--GLTGQFYRQ--FALTIAISTVISA  
FNSLTLSPALA  
AVLLKGHHEPKDRFSVFL-----DKLLGSWLFPRPFNRFFDRASHGYV  
GTVNRVLRGSSIALLVYGGMLVLTYFGF-SSTPTGFVPQQDKQYLVAFAQLPDAASLDRTEAVIKQMSEIALA---  
QPGVADS  
VAFPGLSING---FTNSPNSGIVFTPLKPFDERKD-----PSQSAGAIAAALNAKYAD-----IQDAYIAIF  
PPPPVQ  
GLGTIGGFRLQIED-RGNQGYEELFKQTQNIITKA-RALP-ELEPSS--VFSSYQVNVNPQIDADIDREKAKTHG  
VAISDIFDTLQV  
YL---GSLYANDFNRF--GRTYQVNVQAEQQFRLEPEQIGQLKVRNNLGE-----MVPLASFIKVS  
DTS  
GPD  
RVM  
H  
Y  
N  
G  
F  
I  
T  
A  
E  
L  
N  
G  
A  
P  
--AAGYSSGQAQAAIEKLLKEE-----LPNGMTYEWTELT  
Y  
Q  
Q  
I  
-L  
A  
G  
N  
T  
A  
L  
F  
V  
F  
P  
L  
C  
V  
L  
L  
A  
F  
L  
V  
L  
A  
A  
Q  
Y  
E  
S  
W  
S  
L  
P  
L  
A  
V  
I  
L  
I  
V  
P  
M  
T  
L  
S  
A  
I  
T  
G  
V  
I  
L  
A  
-----GSDNNIFTQIGLIVLVGLACKNAILIVEFAKDKQE-----EGMDRVA  
A  
V  
L  
E  
A  
C  
R  
L  
R  
L  
R  
P  
I  
L  
M  
T  
S  
I  
A  
F  
I  
M  
G  
V  
V  
P  
L  
V  
I  
-S  
T  
G  
A  
G  
A  
E  
M  
R  
H  
A  
M  
G  
V  
A  
V  
F  
S  
G  
M  
I  
G  
V  
T  
F  
F  
G  
L  
L  
L  
T  
P  
V  
F  
Y  
V  
L  
I  
R  
R  
F  
V  
E  
N  
R  
E  
A  
R  
R  
A  
A  
N  
D  
K  
G  
L  
P  
E  
V  
H  
A  
-----</seq-data>

</sequence>

<sequence seq-type="Protein">

<seq-name>o06471</seq-name>

<seq-info><length>1374</length></seq-info>

<seq-data>-----MNISKFFIDRPIFAGVLSVILLGGVIAMFLLPISEYPEVPPSVIVKAQYPGANPKVIAE  
TVASPLEEQING-VENMLYMQSQANS DGNMTITVTFKLGTDPKATQLVQNRVNQALPRLPEDVQ-RLGITT  
VKSSPTLT  
M  
V  
V  
H  
L  
I  
S  
P  
D  
N  
-----RYDMTYLR-NYALINVKDRLSRIQGVGQVQLWGSGDYAMRVWLD  
P  
Q  
K  
V  
A  
Q  
R  
G  
L  
S  
A  
E  
D  
V  
V  
Q  
A  
I  
R  
E  
Q  
N  
V  
Q  
V  
A  
A  
G  
V  
I  
G  
A  
S  
P  
S  
L  
P  
G  
T  
P  
L  
Q  
L  
S  
V  
N  
A  
R  
G  
R  
L  
Q  
T  
E  
D  
E  
F  
G  
D  
I  
V  
V  
K  
-----T  
T  
P  
D  
G  
G  
V  
T  
H  
L  
R  
D  
I  
A  
R  
I  
Q  
L  
D  
-----ASEYGLRSLLDNK----PAVAMAINQSPGANS  
L  
Q  
I  
S  
D  
E  
V  
R  
K  
T  
M  
A  
E  
L  
K  
--Q  
D  
M  
P  
A  
G  
V  
D  
Y  
K  
I  
V  
Y  
D  
P  
T  
Q  
F  
V  
R  
S  
S  
I  
K  
A  
V  
V  
H  
T  
L  
L  
E  
A  
I  
A  
L  
V  
V  
I  
V  
V  
I  
F  
L  
Q  
T  
W  
R  
A  
S  
L  
I  
P  
L  
I  
A  
V  
P  
V  
S  
I  
I  
G  
T  
F  
S  
L  
L  
A  
F  
G  
Y  
S  
I  
N  
A  
L  
S  
L  
F  
G  
M  
V  
L  
A  
I  
G  
I  
V  
D  
D  
A  
I  
V  
V  
E  
N  
V  
E  
R  
N  
I  
-----ENGMNARQATYKAMQEVS  
G  
P  
I  
I  
A  
I  
A  
L  
T  
L  
V  
A  
V  
F  
V  
P  
L  
A  
F  
M  
S  
--G  
L  
T  
G  
Q  
F  
Y  
K  
Q  
--F  
A  
M  
T  
I  
A  
I  
S  
T  
V  
I  
S  
A  
F  
N  
S  
L  
T  
L  
S  
P  
A  
L  
S  
A  
I  
L  
L  
K  
G  
H  
G  
D  
K  
E  
D  
W  
L  
T  
R  
V  
M  
-----NRVLG-GFFRGFN  
K  
V  
F  
H  
R  
G  
A  
E  
N  
Y  
G  
R  
G  
V  
R  
G  
V  
L  
S  
R  
K  
T  
L  
M  
L  
G  
V  
Y  
L  
V  
L  
G  
A  
T  
V  
L  
V  
S  
-K  
V  
V  
P  
G  
G  
F  
V  
P  
A  
Q  
D  
K  
E  
Y  
L  
I  
A  
F  
A  
Q  
L  
P  
N  
G  
A  
S  
L  
D  
R  
T  
E  
K  
V  
I  
R  
D  
M  
G  
S  
I  
A  
L  
K  
--Q  
P  
G  
V  
E  
S  
A  
V  
A  
F  
P  
G  
L  
S  
V  
N  
G  
--F  
T  
N  
S  
S  
A  
G  
I  
V  
F  
V  
T  
L  
K  
P  
F  
A  
E  
R  
H  
G  
-----K  
A  
L  
S  
A  
G  
A  
I  
A  
G  
A  
L  
N  
Q  
K  
Y  
G  
A  
-----M  
K  
D  
S  
F  
V  
A  
V  
F  
P  
P  
P  
V  
L  
G  
L  
G  
T  
L  
G  
G  
F  
K  
M  
Q  
I  
E  
D  
-R  
G  
A  
V  
G  
Y  
A  
K  
L  
S  
D  
A  
T  
N  
D  
F  
I  
K  
R  
A  
-Q  
Q  
A  
P  
-E  
L  
G  
P  
----L  
F  
T  
S  
Y  
Q  
I  
N  
V  
P  
Q  
L  
N  
V  
D  
L  
D  
R  
V  
K  
A  
K  
Q  
L  
G  
V  
P  
V  
T  
D  
V  
F  
N  
T  
M  
Q  
V  
Y  
L  
--G  
S  
L  
Y  
V  
N  
D  
F  
N  
R  
F  
--G  
R  
V  
Y  
Q  
V  
R  
V  
Q  
A  
D  
A  
P  
F  
R  
Q  
R  
A  
D  
D  
I  
L  
Q  
L  
K  
T  
R  
N  
D  
K  
G  
E  
----M  
V  
P  
L  
S  
S  
L  
V  
T  
V  
T  
P  
T  
F  
G  
P  
E  
M  
V  
V  
R  
Y  
N  
G  
Y  
T  
A  
A  
D  
I  
N  
G  
G  
P  
--A  
P  
G  
F  
S  
S  
G  
Q  
A  
Q  
A  
A  
V  
E  
R  
I  
A  
D  
E  
T  
-----L  
P  
R  
G  
V  
R  
F  
E  
W  
T  
D  
L  
T  
Y  
Q  
Q  
I  
-L  
A  
G  
D  
S  
A  
M  
W  
V  
F  
P  
I  
S  
V  
L  
L  
V  
F  
L  
V  
L  
A  
A  
L  
Y  
E  
S  
L  
T  
L  
P  
L  
A  
V  
I  
L  
I  
V  
P  
M  
S  
I  
L  
S  
A  
L  
T  
G  
V  
W  
L  
T  
-----Q  
G  
D  
N  
N  
I  
F  
T  
Q  
I  
G  
L  
M  
V  
L  
V  
G  
L  
S  
A  
K  
N  
A  
I  
L  
I  
V  
E  
F  
A  
R  
E  
L  
H  
-----D  
G  
R  
T  
P  
L  
E  
A  
A  
I  
E  
A  
S  
R  
L  
R  
L  
P  
I  
L  
M  
T  
S  
I  
A  
F  
I  
M  
G  
V  
V  
P  
L  
V  
T  
-S  
T  
G  
A  
G  
S  
E  
M  
R  
H  
A  
M  
G  
V  
A  
V  
F  
F  
G  
M  
L  
G  
V  
T  
L  
F  
G  
L  
I  
-----</seq-data>

</sequence>

<sequence seq-type="Protein">

<seq-name>q9zh24</seq-name>

<seq-info><length>1374</length></seq-info>

<seq-data>-----MARFFIDRPVFAWVISLLIVLAGVLAIRFLPVAQYPDIAPPVVNVVSASYPGASAKVVE

EAVTAIIEREMNG-APGLLYTKATS-QHRQASLTFRQGVNADLAAVEVQNRLKIVESRLPESVR-RDGIYVEKAADSIQLIV  
TLTSSSG-----RYDAMELG-EIASSNVLQALRRVEGVGKQVETWG-AEYAMRIWPDPAKLTSMNLSAS  
DLVNAVRRHNARLTVGDIGNLGVPSAPISATVKVDDTLVTPEQFGEIPLR-----IRADGGAI  
RLRDVARVEFG-----QSEYGFVSRVNQM-----TATGLAVKMAPGSNAVATAKHPRHP-RRVS--RYFPEGVSYNIPYDTS  
AFVEISIRKVVSTLLEAMLLVFAVMYLFMQNFRATLIPTLVVPVALLGTFTVMLGLGFSINVLTMFGMVLAIGILVDDAIIVVE  
NVERLMA-----EEGLSPHDATVKPMRQISGAIVGITVVLVSVFVPMAFFS---GAVGNIYRQ--FAVTLAVSIGFSAFLAL  
SLTPALCATLLRPIDAD-----HHEKR-GFFGWFNRAFLRLTG  
RYRNAVAGILARPIRWMLVYTLVIGVVALLF-VRLPQAFLPEEDQGDFMIMVMQPEGTPMAETMANVGDVERYLAE---H  
EPVAYAYAVGGFSLYG----DGTSSAMIFATLKDWSERRE-----ASQHVGAIVERINQRFAG-----LPNRTVY  
AMNSPPLPDGSGDFRQLD-RGGVGYEALVKARDQLLARA-AEDP-RLAN----VMFAGQGEAPKIRLDIDRRKAETLGV  
SMDEINTTLAVMF---GSDYIGDFMHG--SQVRKVVVQADGAKRLGIDDIGRLHVRNEQGE-----MVPLATFAKAAWTLGP  
PQLTRYNGYPSFNLEQA--APGYSSGEAMQAMEQLMQG-----LPEGIAHEWWSGQSFEER-LSGAQAPALFALS  
VLIVFLALAALYESWSIPLAVILVVPLGVLGALLGVSLR-----GLPNDIYFKVGLITIIGLSAKNAILIEVAKDHYQ-----  
EGMSLLQATLEAARLRLRPIVMTSLAFGFGVVPLAL-SSGAGSGAQAIGTGVVGGIVTATVLAVFLVPLFFLVVGRFLRLK  
APRTGNSPQIPTEQA-----</seq-data>

</sequence>

<sequence seq-type="Protein">

<seq-name>q9zng8</seq-name>

<seq-info><length>1374</length></seq-info>

<seq-data>-----MARFFIDRPVFAWVISLLIVLAGVLAIRFLPVAQYPDIAPPVVNVSATYPGASAKVV  
EEAVTAIIEREMNG-APGLLYTKATS-STGQASLTFRQGVNANLAAVEVQNRLKIVESRLPESVR-RDGIYVEKAADSIQLIV  
TLTSSSG-----RYDAMELG-EIASSNVLQALRRVEGVGKQVETWG-AEYAMRIWPDPAKLTSMNLSAS  
DLVNAVRRHNARLTVGDIGNLGVPSAPISATVKVDDTLVTPEQFGEIPLA-----HPRDGGAI  
IRLRDVARVEFG-----QSEYGFVSRVNQM-----TATGLAVKMAPGSNAVATAKRIRATLDELS--RYFPEGVSYNIPYDTS  
AFVEISIRKVVSTLLEAMLLVFAVMYLFMQNFRATLIPTLVVPVALLGTFTVMLGLGFSINVLTMFGMVLAIGILVDDAIIVVE  
NVERLMA-----EEGLSPHDATVKAMRQISGAIVGITVVLVSVFVPMAFFS---GAVGNIYRQ--FAVTLAVSIGFSAFLAL  
SLTPALCATLLRPIDAD-----HHEKR-GFFGWFNRAFLRLTG  
RYRNAVAGILARPIRWMLVYTLVIGVVALLF-VRLPQAFLPEEDQGDFMIMVMQPEGTPMAETMANVGDVERYLAE---H  
EPVAYAYAVGGFSLYG----DGTSSAMIFATLKDWSERRE-----ASQHVGAIVERINQRFAG-----LPNRTVY  
AMNSPPLPDGSGDFRQLD-RGGVGYEALVKARDQLLARA-AEDP-RLAN----VMFAGQGEAPQIRLDIDRRKAETLG  
VSMDEINTTLAVMF---GSDYIGDFMHG--SQVRKVVVQADRRKRLGIDDIGRLHVRNEQGE-----MGAAGDVRQGRLDPR  
PAATDPLQRLSLVQPRGPG--RAGLQQREAMQAMEQLMQG-----TARGIRPRVVRPVLRRTPVAGAQAQAPALFA  
LSVLIVFLALAALYESWSIPLAVILVVPLGVLGALLGVSLR-----GLPNDIYFKVGLITIIGLSAKNAILIEVAKDHYQ-----  
---EGMSLLQATLEAARLRLRPIVMTSLAFGFGVVPLAL-SSGAGIRAQAIGTGVVGGIVTATVLAVFLVPLFFLVVGRFLRLR  
KAPRTGNSPQIPTEQA-----</seq-data>

</sequence>

<sequence seq-type="Protein">

<seq-name>o87936</seq-name>

<seq-info><length>1374</length></seq-info>

<seq-data>-----MARFFIDRPVFAWVISLFIIMLGGIFAIRALPVAQYPDIAPPVVSLEYATYPGASAQVV  
EESVTAVIEREMNG-VPGLLYTSATS-SAGQASLSLTFKQGVSAADLAAVDVQNRLKIVEARLPEPVR-RDGISIEKAADNAQII  
VSLTSEDG-----RISGVELG-EYASANVLQALRRVEGVGKQVQFWG-AEYAMRIWPDVPVKMAALGLT

ASDIASAVRAHNARVTIGDVGRSAVPDSAPIAATVLADAPLTPDAFGAIALR-----ARADGS  
TLYLRDVARIEFG-----GNDYNYPSPFVNGK----TATGMGIKLAPGSNAVATEKRVVRATMEELA--KFFPPGVKYQIPYET  
ASFVRVSMKVVTTLVEAGVLVFAVMFLFMQNFRAFLIPLVVPVALLGTFGAMLAAGFSINVLTMFGMVLAIIGILVDDAI  
VVVENVERLMV-----EELPPYEATVKAMKQISGAIVGITVVLTSVFPVMAFFG---GAVGNIYRQ--FAFALAVSIGFSA  
FLALSLTPALCATLLKPVADD-----HHEKD-GFFGWFNRFV  
ARSTHRYTRRVGRVLERPLRWLVVYGALTAALLI-TKLPAAFDPDEDQGNFMVMVIRPQGTPLAETMQSVRRVEEYVR  
T---HSPSAYTFALGGYNLYG----EGPNGGMIFVTMKDWKERK-----ARDQVQAIIEINAHFAG-----TP  
NTMVFAINMPALPDLGLTGGDFRLQD-RGGLGYGAFVAAREKLLAEG-RKDP-VLTD----LMFAGTQDAPQLKLDIDRAK  
ASALGVSMEEINATLAVMF---GSDYIGDFMHG--SQVRRVIVQADGRHRLDAADVTKLRVRNAKGE-----MVPLAAFATLH  
WTMGGPQLTRYNGFPSFTINGAA--SAGHSSGEAMAAIERIAST-----LPAGTGYAWSGQSYEER-LSGAQAPML  
FALSVLVFLALAAALYESWSIPFAVMLVVPLGVIGAVAGVTLR-----GMPNDIYFKVGLIATIGLSAKNAILIVEVAKDLV  
A-----QRMSLADAALEAARLRLRPIVMTSLAFGVGVLPALAF-ATGAASGAQIAGTGVGGVISATLFAIFLVLFFVCVQ  
RVFDVVPVRRPGGAQAALAK-----</seq-data>

</sequence>

<sequence seq-type="Protein">

<seq-name>q51396</seq-name>

<seq-info><length>1374</length></seq-info>

<seq-data>-----MSEFFIKRPNFAWVVALFISLGGLLVISKLPVAQYPNVAPPQITITATYPGASAKVLV  
DSVTSVLEESLNG-AKGLLYFESTNNSNGTAEIVVTFEPGTDPLAQVDVQNRLLKAEARMPQAVL-TQGLQVEQTSAGFL  
LIYALSYKEGAQ-----RSDTTALG-DYAARNINNELRRLPGVVGKQFFS-SEAAMRVWIDPQKLVGFGLS  
IDDVSNAIRGQNVQVPAGAFGSAPGSSAQELTATLAVKGTLDLDPQEFQVVLV-----ANED  
GSLVPARRCRAPGTR-----QGELQHFLATERH----AHRGRGYPVARGQRDPDPTLVKQRLAELS--AFFPEDMQYSV  
PYDTSRFVDVAIEKVIHTLIEAMVLVFLVMFLFLENVRYTLIPSIVVPVCLLGTLMVMYLLGFSVNMMTMFGMVLAIIGILV  
DAIVVENVERIMA-----EEGSPAETVKAMKQVSGAIVGITLVLSAVFLPLAFMA---GSVGVIIYQQ--FSVSLAVSILF  
SGFLALTFTPALCATLTKPIPEG-----HHEKR-GFFGAFNRGF  
ARVTERYSLLNSKLVARAGRFMLVYAGLVAMLGIFY-LRLPEAFVPAEDLGYMVVDVQLPPGASRVRTDATGEELERFLKS-  
--REAVASVFLISGFSFSG-----QGDNAALAFPTFKDWSERG-----AEQSSAAEIAALNEHFAL-----PDDGTV  
MAVSPPPINGLGNSSGFALRLMD-RSGVGREALLQARDTLLGEI-QTNP-KFLY----AMMEGLAEAPQLRLLIDREKARALG  
VSFETISGTLAAAF---GSEVINDFTNA--GRQQRVVIQAEQGNRMTPESVLELYVPNAAGN-----LVPLSAFVSVKWEEGPVQ  
LVRYNGYPSIRIVGDA--APGFSTGEAMAEMERLASQ-----LPAGIGYEWTGLSYQEK-VSAGQATSLFALAILVVF  
LLLVALYESWSIPLSVMLIVPIGAIGAVLAVMVS-----GMSNDVYFKVGLITIIGLSAKNAILIVEFAKELWE-----QG  
HSLRDAAIEAARLRFRIIMTSMFILGVIPLAL-ASGAGAASQRAIGTGVIGGMLSATFLGVLFVPICFVWLLSLLRSKPAPIE  
QAASAGE-----</seq-data>

</sequence>

<sequence seq-type="Protein">

<seq-name>q51073</seq-name>

<seq-info><length>1374</length></seq-info>

<seq-data>-----MAKFFIDRPIFAWVISIFIIAAGIFGIKSLPVSQYPSVAAPTITLHAIYPGASAQVM  
SVLSVIERNMNG-VEGLDYMSTSADSSGSGSVSLTFTPDTDENLAQVEVQNKLSEVLRLTPATVQ-QYGVTVSKARSNFLMI  
VMLSSDVQ-----STEEMN-DYAQRNVVPELQRIEGVGVQVRLFG-AQRAMRIWVDPKQLQNYNLS  
FADVGSALSAQNIQISAGSIGSLPAVRGQTVTATVTAQGGQLGTAEFGNVILR-----ANTDG  
SNIYKLDVAKVGLG-----MEDYSSSTRLNGV-----NTTGMAVMLSNSGNAMATAKAVKERLAVLE--KYFPQGM  
SWKT

PYDTSKFVEISIEKVIHTLIEAMVLFVVMYFLQNIQRYTLIPTIVVPISLLGGFAFISYMGMSINVLTMFAMILVIGIVVDDAIV  
VVENVERIMA-----GEGLPPEATKKAMGQISGAVIGITAVLISVFVPLAMFS---GAAGNIYKQ--FALTMASSIAFSAFL  
ALTLTPALCATMLKTIPKG-----HHEEKKGFFGWFNKKFDS  
WTHGYEGRVAKVLRKTRMMVVYIGLAVVGVFLF-MRLPTSFLPTEDQGFVMVSVQLPAGATKERTDATLAQVTQLAKS-  
--IPEIENITVSGFSFSG----SGQNMAMGFAIFKDWNERA-----SGSDAVAVAGKLTGMMMGM-----TLKD  
GFGIAVPPPILELNGSGLSINLQD-RNNTGHTGIAGEGNELIQKM-RASG-LFDPST--VRAGGLEDSPLKIDINRAAAAA  
QGISFADIRALASAL---SSSYVSDFPNQ--GRLQRVMVQADEEDARMQPADILNLTVPNKSGV-----AVPLSTIATVSWENG  
TEQSVRFNGYPSMKSASP--ATGVSTGQAMEAVQKMVDE-----LGGGYSFEWGGQSSEEAKGGSQTLILYGL  
AVAAVFLVLAALYESWSIPLAVILVIPLGLIGAAAGVTGRNLFEGLLGSVP-SFANDIYFQVGFVTVMGLSAKNAILIIEFAKDL  
QA-----QGKSAVEAALEAARLRFRIIMTSFAMILGVVPLYI-AAGASSASQRAIGTTVFWGMLVGTLLSVFLVPLFYVVV  
RKFFKETAHEHEMAVRHASKAGITGSDDKQY----</seq-data>

</sequence>

<sequence seq-type="Protein">

<seq-name>ACRF\_ECOLI</seq-name>

<seq-info><length>1374</length></seq-info>

<seq-data>-----MANFFIRPIFAWVLAIIIMMAGALAILQLPVAQYPTIAPPAVSVSANYPGADAQT  
VQDVTVQVIEQNMNG-IDNLMYMSSTSDSAGSVTITLTFQSGTDPDIAQVQVQNKQLLATPLLPQEVQ-QQGIVSEKSSSS  
YLMVAGFVSDNP-----GTTQDDIS-DYVASNVKDTLSRLNGVGDVQLFG-AQYAMRIWLDADLLNK  
YKLTVPDVINQLKVQNDQIAAGQLGGTPALPGQQLNASIIAQTRFKNPEEFGKVTLR-----V  
NSDGSVRLKDVARELG-----GENYNVIARINGK-----PAAGLGIKLATGANALDTAKAIKAKLAELQ--PFFPQGMKVL  
YPYDTPPFVQLSIHEVVKTLFEAIMLVFLVMYFLQNMRAITLIPTIAPVAVLLGTFAILAAGFSINTLTMFGMVLAIGLLVDD  
AIVVVENVERVMM-----EDKLPPKEATEKSMQIQGALVGIAMVLSAVFIPMAFFG---GSTGAIYRQ--FSITIVSAMA  
LSVLVALILTPALCATLLKPVSA-----EHHENKGGFFGWFNT  
TFDHSVNHYTNSVGKILGSTGRYLLIYALIVAGMVVLF-LRLPSSFLPEEDQGVFLTMIQLPAGATQERTQKVLDQVTDYLLK  
NE-KANVESVFTVNGFSFSG----QAQNAQMAFVSLKPWEERNG-----DENSAAEVIHRAKMELGK-----IR  
DGFVIPFNMPAIVELGTATGFDFELID-QAGLGHDAQTARNQQLGMA-AQHPASLVS---VRPNGLEDTAQFKLEVDQEK  
AQALGVSLSDINQITISTAL---GGTYVNDFIDR--GRVKKLYVQADAKFRMLPEDVDKLYVRSANGE-----MVPFSAFTTSHW  
VYGSPLRLERYNGLPSMEIQGEA--APGTSSGDAMALMENLASK-----LPAGIGYDWTGMSYQER-LSGNQAPAL  
VAISFVVVFLCLAALYESWSIPVSVMLVPLGIVGVLLAATLF-----NQKNDVYFMVGLLTTIGLSAKNAILIVEFAKDLM  
EK-----EGKGVVEATLMAVRMRLRPILMTSLAFILGVLPPLAI-SNGAGSGAQAQNAVIGIGVMGGMVVSATLLAIFVPPVFFV  
VIRRCFKG-----</seq-data>

</sequence>

<sequence seq-type="Protein">

<seq-name>acrb\_ecoli</seq-name>

<seq-info><length>1374</length></seq-info>

<seq-data>-----MPNFFIDRPIFAWVIAIIIMLAGGLAILKLPVAQYPTIAPPAVTISASYPGADAKTVQ  
DVTVQVIEQNMNG-IDNLMYMSSTSDSTGTVQITLTFESGTDADIAQVQVQNKQLLAMPPLLPQEVQ-QQGVSVSEKSSSSF  
LMVVGVINVDG-----TMTQEDIS-DYVAANMKDAISRSGVGDVQLFG-SQYAMRIWMNPNELNK  
FQLTPVDVITAIKAQNAQVAAGQLGGTPPVKGGQQLNASIIAQTRLTSTEEFGKILLK-----VN  
QDGSRVLLRDVAKIELG-----GENYDIIAEFNGQ-----PASGLGIKLATGANALDTAAAIRAELAKME--PFFPSGLKIVYPY  
DTPPFVKISIEHVVKTLVEAAILVFLVMYFLQNFRAITLIPTIAPVAVLLGTFAVLAAGFSINTLTMFGMVLAIGLLVDDAIVV  
ENVERVMA-----EEGLPPKEATRKSQIQGALVGIAMVLSAVFVPMMAFFG---GSTGAIYRQ--FSITIVSAMALSVLV

ALILTPALCATMLKPIAKG-----DHGEGKKGFFGWFNRMFE  
KSTHHYTDVSGGILRSTGRYLVLVLIIVVGMAYLF-VRLPSSFLPDEDQGVFMTMVQLPAGATQERTQKVLNEVTHYYLTKE-  
KNNVESVFAVNGFGFAG----RGQNTGIAFVSLKDWADRPG-----EENKVEAITMRATRAFSQ-----IKDA  
MVFAFNLPAIVELGTATGFDFELID-QAGLGHEKLTQARNQLLAEA-AKHPDMLTS---VRPNGLEDTPQFKIDIDQEKAQA  
LGVSINDINTTLGAAW---GGSYVNDFIDR--GRVKKVYVMSEAKYRMLPDDIGDWYVRAADGQ----MVPFSAFSSSRWE  
YGSPRLERYNGLPSMEILGQA--APGKSTGEAMELMEQLASK-----LPTGVGYDWTGMSYQER--LSGNQAPSLY  
AISLIVVFLCLAALYESWSIPFSVMLVVPLGVIGALLAATFR-----GLTNDVYFQVGLLTTIGLSAKNAILIVEFAKDLMDK  
-----EGKGLIEATLDAVRMRLRPILMTSLAFILGVMPLVI-STGAGSGAQNAVGTGVMGGMVTATVLAIFFVPVFFVVV  
RRRFSRKNEDIEHSHTVDHH-----</seq-data>

</sequence>

<sequence seq-type="Protein">

<seq-name>YHIV\_ECOLI</seq-name>

<seq-info><length>1374</length></seq-info>

<seq-data>-----MANYFIDRPVFAWVLAIIIMMLAGGLAIMNLPVAQYPQIAPPTITVSATYPGADAQ  
TVEDSVTQVIEQNMNG-LDGLMYMSSTSDAAGNASITLTFETGTSPDIAQVQVQNKQLLAMPSPPEAVQ-QQGISVDKSS  
SNILMVAAFISDNG-----SLNQYDIA-DYVASNIKDPLSRTAGVGSVQLFG-SEYAMRIWLDPQKLNK  
YNLVPDVISQIKVQNNQISGGQLGGMPQAADQQLNASIIVQTRLQTPPEFGKILLK-----V  
QQDGSQVLLRDVARVELG-----AEDYSTVARYNGK----PAAGIAIKLAAGANALDTSRAVKEELNRLS--AYFPASLKTV  
YPYDTPFIEISIQEVFKTLVEAIIIVFLVMYFLQNFRAIIPAVPVVILGTFAILSAVGFTINTLTMFGMVLAIGLLVDDAIVV  
VENVERVIA-----EDKLPPKEATHKSMGQIQRALVGIADVLSAVFMPMAFMS---GATGEIYRQ--FSITLISSMLLSVFV  
AMSLTPALCATILKAAP-----EGGHKPNALFARFNTLFEKS  
TQHYTDSTRLLRCTGRYMVVYLLICAGMAVLF-LRTPTSFLPEEDQGVFMTTAQLPSGATMVNTTKVLQQVTDYYLTKE-K  
DNVQSVFTVGGFGFSG----QGQNNGLAFISLKPWSERVG-----EENSVTAIQRAMIALSS-----INKAVVFP  
FNLPAVAELGTASGFDMELLD-NGNLGHEKLTQARNELLSLA-AQSPNQVTG---VRPNGLEDTPMFKVNVNAAKAEAM  
GVALSDINQTIKSTAF---GSSYVNDFLNQ--GRVKKVYVQAGTPFRMLPDNINQWYVRNASGT-----MAPLSAYSSTEWTYG  
SPRLERYNGIPSMEILGQA--AAGKSTGDAMKFMADLVAK-----LPAGVGYSWTGLSYQEA-LSSNQAPALYAISL  
VVVFLAALYESWSIPFSVMLVVPLGVVIGALLATDLR-----GLSNDVYFQVGLLTTIGLSAKNAILIVEFAVEMMQK--  
-----EGKTPIEAIIAARMRLRPILMTSLAFILGVLPLVI-SHGAGSGAQNAVGTGVMGGMFAATVLAIFYVPVFFVVVEHL  
FARFKKA-----</seq-data>

</sequence>

<sequence seq-type="Protein">

<seq-name>ACRD\_ECOLI</seq-name>

<seq-info><length>1374</length></seq-info>

<seq-data>-----MANFFIDRPIFAWVLAIIILLCTGLTALIFSLPVEQYPLAPPNVRVTANYPGASAQTL  
NTVTQVIEQNMGT-LDNLMYMSSQSSGTGQASVTLFSKAGTDPDEAVQQVQNLQNSAMRKLPAVQ-NQGVTVRKTG  
DTNILTIAFVSTDG-----SMDKQDIA-DYVASNIQDPLSRVNGVGDIDAYG-SQYSMRIWLDPAKLNS  
FQMTAKDVTDAIESQNAQIavgQLGGTPSVDKQALNATINAQSLTQPEQFRDITLR-----V  
NQDGSEVRLGDVATVEMG-----AEKYDYLSRFNGK----PASGLGVKLASGANEMATAELVLNRLDELA--QYFPHGLE  
YKVAYETTSFVKASIEDVVKTLLEAIALVFLVMYFLQNFRAIIPAVPVVLMGTFSVLYAFGYSVNTLTMFAMVLAIGLLV  
DDAIVVENVERIMS-----EEGLTPREATRKSMGQIQGALVGIAMVLSAVFVPMMAFFG---GTTGAIYRQ--FSITIVAA  
MVLVSVLVA MILTPALCATLLKPLKKG-----EHHGQK-GFFA  
WFNQMFNRNAERYEKVAKILHRSLRWIVYVLLLGGMVFLF-LRLPTSFLPLEDRGMFTTSVQLPSGSTQQQTLKVVEQIE

KYYFTHE-KDNIMSVFATVGSPPGG-----NGQNVARMFIRLKDWSERDS-----KTGTSFAIIRATKAFNQ-----  
---IKEARVIASSPPAISGLSSAGFDMELQD-HAGAGHDALMAARNQLLALA-AENP-ELTR---VRHNGLDSPQLQIDIDQ  
RKAQALGVAIDDINDTLQTAW---GSSYVNDFMDR--GRVKKVYVQAAAPYRMLPDDINLWYVRNKDGG-----MVPFSAF  
ATSRWETGSPRLERYNGYSAVEIVEA--APGVSTGTAMDIMESLVKQ-----LPNGFGLEWTAMSYQER-LSGAQ  
APALYAISSLVFLCLAALYESWSVPPFSVMLVVPLGVIGALLATWMR-----GLENDVYFQVGLLTVIGLSAKNAILIVEF  
ANEMNQ-----KGHDLFEATLHACRQRLRPILMTSLAFIFGVLPMAT-STGAGSGGQHAVGTGVMGGMISATILAIYFV  
PLFFVLVRRRFLKPRPE-----</seq-data>

</sequence>

<sequence seq-type="Protein">

<seq-name>MEXB\_PSEAE</seq-name>

<seq-info><length>1374</length></seq-info>

<seq-data>-----MSKFFIDRPIFAWVIALVIMLAGGLSILSLPVNQYPAIAPPAIAVQVSYPGASAETVQ  
DTVVQVIEQQMNG-IDNLRYSSESNSDGSMTTTFEQGTDPDIAQVQVQNKQLATPLLPQEVQ-RQGIRVTKAVKNFL  
MVGVVSTDG-----SMTKEDLS-NYIVSNIQDPLSRTKGVGDFQVFG-SQYSMRIWLDPAKLNSYQL  
TPGDVSSAIQAQNVQISSGQLGGLPAVKGQQLNATIIGKTRLQTAEQFENILK-----VNP  
GSQVRLKDVADVGLG-----GQDYSINAQFNGS----PASGIAIKLATGANALDTAKAIRQTIANLE--PFMPQGMKVVP  
YDTPPVVSASIEHVKTLGEAILLVFLVMYFLQNFRAFLIPTIAVPVLLGTFGVLAAGFSINTLTMFGMVLAIGLLVDDAIV  
VVENVERVMA-----EGLSPREAARKSMGQIQGALVGIAMVLSAVFLPMAFFG---GSTGVIYRQ--FSITIVSAMALSV  
IVALILTPALCATMLKPIEK-----DHGEHKGGFFGWFNRM  
FLSTTHGYERGVASILKHRAPYLLIYVVIVAGMIWMF-TRIPTAFLPDEDQGVLFQVQTPPGSSAERTQVVVDSMREYLL  
KE-SSSVSVFTVTGFNFAG----RGQSSGMAFIMLKPWEERPG-----GENSVFELAKRAQMHHFS-----FKD  
AMVFAFAPPSVLELGNATGDFLQD-QAGVGHEVLLQARNKFLMLA-AQNP-ALQR---VRPNGMSDEPQYKLEIDDEK  
ASALGVSLADINSTVSIW---GSSYVNDFIDR--GRVKRVYLQGRPDARMNPDDLKSWYVRNDKGE-----MVPFNAFATGK  
WEYGSPKLERYNGVPAMEILGEP--APGLSSGDAMA AVEEIVKQ-----LPKGVGYSWTGLSYEER-LSGSQAPALY  
ALSLLVFLCLAALYESWSIPFSVMLVVPLGVIGALLATSMR-----GLSNDVFFQVGLLTTIGLSAKNAILIVEFAKELHE--  
-----QGKGIVEAAIEACRMRLRPVMTSLAFILGVVPLAI-STGAGSGSQHAIGTGVIGGMVTATVLAIFWVPLFYVAVSTL  
FKDEASKQQASVEKGQ-----</seq-data>

</sequence>

<sequence seq-type="Protein">

<seq-name>o52248</seq-name>

<seq-info><length>1374</length></seq-info>

<seq-data>-----MSKFFIDRPIFAWVIALVIMLVGALSILKLPINQYPSIAPPAIAIAVTPGASAQTQVD  
TVVQVIEQQNLG-IDNLRYSSESNSDGSMTITATFEQGTNPDTAQVQVQNKLNLATPLLPQEVQ-QQGIRVTKAVKNFL  
VIGLVSEDG-----SMTKDDLA-NYIVSNMQDPISRTAGVDFQVFG-AQYAMRIWLDPAKLNKFQL  
TPVDVKTAVAAQNVQVSSGQLGGLPALPGTQLNATIIGKTRLQTAEQFESILLK-----VNKD  
GSQVRLGDVAQVGLG-----GENYAVSAQFNGK----PASGLAVKLATGANALDTAKALRETIKGLE--PFFPPGVKAVFP  
YDTPPVVTEISGVIHTLIEAVVLVFLVMYFLQNFRAFIITMTVPVLLGTFGILAAAGFSINTLTMFAMVLAIGLLVDDAIV  
VVENVERVMS-----EGLPPKEATKRSMEQIQGALVGIALLVLSAVLLPMAFFG---GSTGVIYRQ--FSITIVSAMGLSVL  
VALIFTPALCATMLKPLKKG-----EHHTAKGGFFGWFNRF  
DRSVNGYERSVGTILRNKVPFLAYALIVVGMWLF-ARIPTAFLPEEDQGVLFQVQTPAGSSAERTQVVVDQMREYLLKD  
E-ADTVSSVFTVNGFNAG----RGQSSGMAFIMLKPWDERS-----KENSVFALAQRAQQHFF-----FRD  
AMVFAFAPPVLELGNATGDFVFLQD-RGGVGHAKLMEARNQFLAKA-AQSK-ILSA---VRPNGLNDEPQYQLTIDDERA



SALGVTIADINNTLSIAL---GASYVNDFIDR--GRVKKVYIQGEPARMSPEDLQKWYVRNGAGE-----MVPFSSFAKGEWTY  
GSPKLSRYNGVEAMEILGAP--APGYSTGEAMAEVERIAGE-----LPSGIGFSWTGMSYEEK-LSGSQMPALFALS  
VLFVFLCLAALYESWSIPIAVVLVPLGIIGALIATSLR-----GLSNDVYFLVGLLTTIGLAAKNAILIVEFAKELHE-----  
QGRSLYDAAIEACRMRLRPIIMTSLAFILGVVPLTI-ASGAGAGSQHAIAGTGVIGGMISATVLAIFWVPLFFVAVSSLFSGKEP  
EKDVTPEENPRYEAGQ-----</seq-data>

</sequence>

<sequence seq-type="Protein">

<seq-name>o31100</seq-name>

<seq-info><length>1374</length></seq-info>

<seq-data>-----MSRFFIDRPIFAWVLAIVAMLAGALSLAKMPISQYPNIAAPAVSIQVSYPGASQAQTV  
QDTVVQVIEQQLSG-LDGFYMSAESASDGSMTIIVTFEQGTDPDIAQVQVQNKQLLATPRLPEEVQ-RQGLRVVKYQMN  
FFLVMSLVDRSG-----KLDNFDLG-NLIASQLQDPISRIPGVGDFQLFG-SPYAMRIWLDPGKLNYSYQ  
LPTDVASAIREQNVQVSSGQLGGLPTRSGVQLNATVLGKTRMTTPSQFDEILVK-----VNP  
DGSQVRVKDVGRAELG-----ADSFISAQYKDS----PTASLALRLSTGGNLETVDVAVKKLMEQQK--AYLPDGVEVIYP  
YDTPPVVEASIESVVHTIFEAVVLVFLVMYLFQSFRAFLIPLAVPVVLLATFALLPYFGLNINVLTMAMVLAIGLLVDDAIV  
VVENVERLMH-----DEGLSPLAATRKSMQDISGALVGIGMVL SAVFVPMAFFG---GSAGIYQQ--FAITIVVCMGLSIL  
VALVFTPALCVTILKAPEGN-----SHHERK-GFFGWFNRIFD  
RGTRRFERGVGAMLKGRGRYLLAFLITGGTYLF-TQIPKAFLPNEDQGLMMIEVVRTPANASAERTEGVLQEVDRDYLAND  
E-GALVEHFMTVNGFNFAG----RGQNSGLVLITFKDWKERHG-----AGQDVFSIAQRANQHFAK-----IKD  
ASVMAFVPPAILEMGNAMGFNLYLQD-NLGLGHEALMAARNQFLQA-SQNP-KLQA---VRPNGKDDEPQFQVNIDDE  
KARALQVSIASINETMSAAW---GSMYVNDFIDR--GRVKRVYVQGEDISRISPEDFDKWYVRNSLQ-----MVPFSAFATGE  
WVNGSPKLERGGISSLNILGEP--APGYSTGDAMIAIAEIMQ-----LPAGIGLSYTGSLYEEI-QTGDQAPLLYAL  
TVLIVFLCLAALYESWSVPVSVIMVPLGILGAVLATLWR-----DLTADVYFQVGLMTTVGLSAKNAILIVEFAKELYEK-  
-----EGYPIVKAIEAAKRLRPIIMTSLAFTFGVLPMAI-ASGAGAGSQHSIATGVVGGMITATVLAFFVPLFYVVVVKL  
FEGLMKRKPNAVKEVTHEV-----</seq-data>

</sequence>

<sequence seq-type="Protein">

<seq-name>Q9RBY8</seq-name>

<seq-info><length>1374</length></seq-info>

<seq-data>-----MVRFFIDRPIFAWVIAIAVSLGLLAILLPVDRYPQIAPPTITIRATYTGASSQTVENA  
VTQVIEQSQQS-LDHLMYMTSTSASDGSQVNLVLFATGTNPDTAQVQVQNLQAAMATLPQAVQ-QNGLTITKSSGSIF  
EVLSFTSEDG-----SMDNFDVA-NFMEARIDDQISRVSGVGNIQPIG-QEYAMRIWLDPEKMRQYA  
LMPWDIETALQAQNTDVSAGELGGQPALKGQQLDATVTARSRLHTPEQFAQVVLK-----A  
DANGSVVRLGDVAKIGLG-----PESYDSISTFNGK----PSASLGIELNAGANAIAVSKAIDARLQQLQ--KYWPHGYTAH  
VAFTTTPFVTISLKEVVITLIEAAILVFLVMYLFQNWRAFLIPLAVPVVLLGTGFLVLAAGFYSINTLTMFALVLAIGLLVDDAIV  
VVENVERVMT-----FEGLAPKATLKAQITGALVGIVLVLTAFLPMAFFS---GVTGVIYRQ--FSVTIAAAMILSVL  
VAMTITPALCGSILHQIPKGGHPHGDHG-----GEPSSLG-KFFIWFN  
HRFERTSNGLRHRVDRFLGRRTLGVLFYLVLSVATGLLL-WHLPGAFLPDEDQGMLNALVKLPAGSTLEQTRAVMDRLSAV  
AVK---DDGVLSIQATAGFSVTG-----SGQNQVQAFIRLKDWDDRK-----DDADTIAARLTRAMAS-----V  
PDAQVFITSPAILGLGDAGGFTLELQD-EGGAGHAAVAARNLLKEA-AKDP-KLVN---VRYASLEDAPVYAVKVDDAK  
AQAMGVNPQDVNDTLNAAL---GGDFVNNFIYK--GRIKKVFIQGTAEARMQPQDIERWSVRNQAGQ-----MVPLSLLIST  
HWTSAPAAVQRYNGISAMEITGQP--APGVSSGEAMAEIARLADT-----LPEGFSHAWSDMAYQEQ-LSGNQA

PMLYAISLLFVFLCLAALYESWAVPFAVMLAVPVGMMFGAVLMMNLR-----GLNNDVYFQVGLLTTIGLAAKNGILIVE  
FARILEQ-----QGKSTREAILQAVYLRLRPVMTSLAFLMGVLPVLF-ATGAGSAARRSLGTGVAGGTVASMVLGMFFV  
PLFYLLVRRFPGRAPADATVPETSP-----</seq-data>

</sequence>

<sequence seq-type="Protein">

<seq-name>o68441</seq-name>

<seq-info><length>1374</length></seq-info>

<seq-data>-----MARFFIDRPIFAWVIAIIIMGLGVLSIMRLPISQYPSIAGPSVVIGATYPGASAETVAD  
TVVQIIEKEMTG-LDGLRYIDSSTTSTGRATVTLTFNLGTDPDIAQVQVQNKLSQAEASLPSEVT-RQGVTVEKSTTGFLMVI  
ALISDDG-----ARSAIDLA-DYLNYSYMVEPVSRKGVGKVEVFG-SEYAMRIWLDQPQKLKYYGLSPTTV  
IHAIQAQNAQISAGSFGAMPAPPEGQQLNATVTAQSLKTPQDFERIVLR-----ADTDGGLVL  
LRDVARAELG-----TENYEISSFYNGK----PSSGVAIQLASGANALETAELVKAKMADLG--AFLPAGVSVYIPYDTPFV  
SLSIEAVIHTLIEAIVLVVFMVLIHLNFRATLIPTLAVPVVLLGTFGIMAALGFSINTLTMLAMVLAIGLLVDDAIVVVENVERI  
MR-----DEHLDPVAATKNRWEKSRARSWASPWWFPPSSCRWRFS---VQQGEMYKQ--FSVTIVAAMALSVLVALI  
FTPALCATMLKAHDHNAK-----SGLASRFSNWFERNFSWL  
TTRYGNVVRASAKRPLRMFLVYLLLVGAMVFLY-QKTPTSFLPDEDQGTLMTIIQTPPGSTAQNTEAVLGKVENYYMNAE-  
AQNVESVFSVSWFLAG----QGQNMGMFMVVKLDWEERKG-----KENSAQAIAARAFGLMG-----GIK  
EAIVVPLVPPAVTELGNSNGFTAFLQA-RSGQSHEQLLEARNMLLGLA-AQSP-KLMA----VRPNGVEDASQFELNIDWGK  
AGAVGLSAADVGSFLTIVW---SSSYVNDFLYE--GRMKRVYVQGEPLARTGPEDLALWRVPNANGD-----FVDLSTIASQN  
WVFGPQQVIRYDALPAMSIEGSA--APGFSSGEALAEIEALAAK-----LPPGFSLQWTGMSLEEK-DAGAGALPLY  
GLALATMFLCLAALYESWTIPVAVLLAMPVGIILGALLGAWIG-----GQSNQVYFQVGLLTVVGLTGKNGIMIVEFARE  
RMAQ-----LGESAFEAVCQAAKLRFRPILMTSLAFGLVIPLVI-STGAGAGARQAIGYATFFGTVTGTLIAIVFPVFFVL  
ISGIFSRRSVKAAEPKTA-----</seq-data>

</sequence>

<sequence seq-type="Protein">

<seq-name>YBDE\_ECOLI</seq-name>

<seq-info><length>1374</length></seq-info>

<seq-data>-----MIEWIIRRSVANRFLVLMGALFLSIWGTWTIINTPVDALPDLSDVQVIIKTSYPGQAPQI  
VENQVTYPLTTTMLS-VPGAQTVRGSF-QFGDSYVYVIFEDGTDPLYWARSRVLEYLNQVQGKLPAGV--SAELGPDATGVG  
WIYEYALVDRSG-----KHDLDLDR-SLQDWFLKYELKTPDVAEVASVGGVKEYQVVIDPQRLAQY  
GISLAEVKSALDASNQEAGGSSIEL-----AEAEMVRASGYLQTLDDFNHIVLK-----ASENG  
VPVYLRDVAKVQIG-----PEMRRGIAELNGEG----EVAGGVVILRSGKNAREVIAAVKDKLETLK--SSLPEGVEIVTTYDR  
SQLIDRAIDNLSGKLEEFIVVAVVCALFLWHVRSALVAIISLPLGLCIAFIVMHFQGLNANIMSLGGIAIVGAMVDAIVMI  
ENAHKRLEEWQHHPDAT--LDNKTRWQVITDASVEVGPALFISLLIITLSFIPIFTLE---GQEGRLFPG--LAFTKTYAMAGAA  
LLAIVVIPILMGYWIRGKI-----PPESSNPLNRFLIRVY  
HPLLLKVLHWPKTLLVAALSVLTVLWPL-NKVGGEFLPQINEGDLLYMPSTLPGISAAEAASMLQKTDKLIMS---VPEVAR  
VFGKTGKAETAT--DSAPLEMVETTIQLKPQEQWR-----PGMTMDKIIELDNTV-----RLPGLANLWVPP  
IRNRIDMLSTGIKSPIGIKVSQVTLADIDAMAEQIEEVA-RTVP-GVAS----ALAERLEGGRYINVEINREKAARYGMTVADVQ  
LFVTSAV---GGAMVGETVEG--IARYPINLRYPQSWRDSQPALRQLPILTPMKQ-----QITLADVADIKVSTGSPMLKTENAR  
PTSWIYIDA---RDRDMVSVVHDLQKAIKAEKV-----QLKPGTSVAFSGQFELLE-RANHKLKLMVPMTLMIIIFVLLYLA  
FRRVGEALLIISVFPALVGGIWLWWM-----GFHLSVATGTGFIALAGVAAEFGVVMMLYLRHAIEAVPSLNNPQTF  
SEQKLDEALYHGAVLRVRPKAMTVAVIIAGLLPILW-GTGAGSEVMSRIAAPMIGGMITAPLLSLFIIPAAYKLMWLHRHRV

RK-----</seq-data>  
</sequence>  
<sequence seq-type="Protein">  
<seq-name>o67202</seq-name>  
<seq-info><length>1374</length></seq-info>  
<seq-data>-----MERFTEILLRNRLPILFISIFLLFYGYSLKKTPIAIPDLSDVQVIYSEWIGQIPQVIEDQL  
TYPLVTNMMG-VPKVKTVRGYS-FPNFSLVFVIFEDGTDLYWARSRVLEKLSSIRSQLPQDA--RIELGPDATGVGWVYKYVL  
VSK-----KRTLEELW-ALQNFYIKYALLSIPDVAEVASVGGFEKEYRILVKPEKLYQYGISLGELYRAIK  
RTNVETGGKYVEI-----NEKEYLIRAVGYVKNREEIEKTVVA-----ERDGVPIRLEDVAKVVEV  
-----PAFRMGVADFNGMG---DTVAGIVVMRFGADAYKVIQRVKEKLEEVK--KGLPEDVQVLTAYDRSTLIESAIENLK  
RKLIEESVVLLVIGIFLFHVRSAIVIIIIFLVLSILTTFAVMNHLGITSNIMSLGGIAIAIGTMVDAIVLVENIHRRL-----E  
EGEKLWDAIVHSAKDVGKPIFFALLIVTVSFVPLFALE---GQAGRLFEP--LVATKTLMSLIASISVIVVPVLAYYFIRGRI-----  
-----PGEEKNPLVKLLIKVYDPVVFHISIKLRYLLILFIFMGVA  
TFYLY-EKLGREFMPPLNEGTLMYMPTTVPSVSRQEMLRILNIQDRILKE---FPEVESVLGKAGRANTPT--DPAPMMSMIETFI  
TLKPQEEWRKVKVERFYSD-WEIPEFIKDILRKVFPEERPL--TYAELIREMDKAISLPGLSNMWTMPIKGRIDMITTGIQTPL  
GIKVYGGDDVNLNEVAQEIEKLL-KDVP-GIMS---VFGERSANALYVEIIPKREELDRYGLTVGDVNEAILTF---ANKKISTVIL  
G--RERYSVTLGIPLDYRYELETLT-IPMKDK-----FVPLSAVADVVKESPSIKSENGLLVSYVFTP--DPEVDMGTVIERA  
EKVLKENL-----KLPKGYEYEWSGQFEYWK-KALENLKVIVPSVILLIILLVWFTFNKLFETFLVITLPIATFGGVLLMYL  
L-----NYNISIASIAGFLALLGIAAEMGIVMVVYIQNALKSEIR-----SKKDAFEAIYKGAVKRIRPKFMTFGAILIGLLPI  
ML-GHGTGSEVMSRIAAPMVGGILSTIVIVLIIPALYAIYVDFRRGNI-----</seq-data>

</sequence>  
<sequence seq-type="Protein">  
<seq-name>q9zjq5</seq-name>  
<seq-info><length>1374</length></seq-info>  
<seq-data>-----MIEKIIDL SVKNKLLTTLVTLIFLASLWAIKSVRLDALPDLSPAQVVVQITYPNQSPKIVQ  
EQVTYPLVSTFMS-IANIDTVRGIS-SYESGLIYIIFKDGVNLYWARDRVLEQLNRVS-NLPKDA--KVEIGSDSTSIGWAYQYAL  
SSD-----SKNLSDLK-VLQDFYRYALLGVDGVSEVASVGGFVKDYEVTLQNDSLIRYNLSLEQVAN  
AIKNSNNDTGGGVILE-----NGFEKIIRSHGYIQSLNDLEEIVVK-----KEGAIPLIKDIASVRL  
A-----PKPRRGAANLNGDK---EVVGGIVMVRYPHADTYKVLKAIKEKIATLQ--ASNPD-VKITSVYDRSELIEKGIDNLIHT  
LIEESVIVLVIIAIFLLHFRSALVVIITLPLSVCISFLMRYFNIEASIMSLGGIAIAIGAMVDAIVMVENAHKHLQHIDT-----R  
DNTQRVNAIMQGVKHVGGAIFFALMIIVVSFLPIFALT---GQEEKLFAP--LAYTKTFAMLVGLSITIVPVLMLVWLIKRI---  
-----LEESKNPINAFFMKIYGVSLKVVLFKFRYAFLIASVL  
GLGGLVVAY-KKLNWEFIPQINEGVIMYPVTVINGVIGIDTALEYLKKSNAAIKQ---LDFVKQVFGKVGRANTST--DAAGLG  
MIETYIELKPQNEWK-----EKLSYKEVRDKLEKTLQ-----LKGLTNSWPTYPIRGRDMLLTGIRTPLGIKLYG  
NDTDKQLQELAILMEQQL-KTLK-ESLS---VFAERSNNGYYITLDLNDENLARYGINKNAVLDTIKFAL---GGATLTTMIKG--V  
ESYPISLRLEDTERNTIEKLNLYIKTAYN-----YMPRELAHVYDYNPAVLKSEKGLNVNFIYIVP--QNGISSD TYRQLAQT  
LEKI-----QLPSGYYEYFSGESQYLE-EAFKTLQYIVPVSVFIIFILIVFALKNLNSLLCFFTLPPAFLGGLIFMNLML-----  
----GFNMSVAALVGFLALLGVASETAIVMIIYLEDAFQKFIKTPKER-TTAALKETIMHGAVLRVRPKLMTFFSILASLIPIMY-  
SHGTGSEIMKSIAAPMLGGMMSSVVLTLFIPTAYFVIKNARIRKREY-----</seq-data>

</sequence>  
<sequence seq-type="Protein">  
<seq-name>o25622</seq-name>

<seq-info><length>1374</length></seq-info>  
<seq-data>-----MMLASIIIEFSLRQRVIVIVGAILILFFGTYSFINTPVDAFPDISPTQVKIILKLPGSSPEEMEN  
NIVRPLELELLG-LKGQKSLRSVS-KYSISDITIDFDDSVDIYLARNIVNERLSSVMKDLPVGV--EGGMAPIVTPLSIDIFMFTIDG  
-----NITEIEKR-QLLDFVIRPQLRMISGVADVNSIGGFSRAFVIVPDFNDMARLGVVISDLES AVR V  
NLRNSGAGRVD R-----DGETFLVKIQTASLSLEDIGKITVS-----TNLG-HLHIKDFAKVISQ---  
-----SRTRLGFVTKDGVG---ETTEGLVLSLKDANTKEIITQVYQKLEELK--PFLPNGVSINVFYDRSEFTQKAIATVSKTLIEA  
VVLIIITLFLFLGNLRASVAVGVILPLSLSVAFIFIKFSDLTNLNLSLGLLVIAIGMLIDS AVVVVENAF EKLSA-----NTKTTK  
LHAIYRSCKEIAVSVVSGVVIIIVFVPILTQ--GLEGKMFRP--LAQSIVYALLGTLVLSITIIPVSSLVKA-----  
-----TPHSETFLTRFLNRIYAPLLEFFVHNPKKVLGAFVFLIASLSLF-PF  
VGKNFMPVLDEGDVLSVETTPSISLDQSRDLMLNIESAIKHH--VKEVKSIVARTGSDELGL--DLGGLNQTDTFISFIPKKEW  
S-----VKTDELLEKIMDSLKD-----FKGINFSFTQPIEMRISEMLTGVRGDLAVKIFGDGISELNELSFQIAQ  
AL-KGIK-GSSE----VLTTLNEG VNYLYVTPNKESMADV GITSDEF SKFLKSAL---EGLVVDVIPTG--ISRTPVMIRQESDFASSI  
TKIKSLALTSKYGV----LVPITSI AKIEEVDGPVSVVRENSMRMSVVR SNV---VGRDLKSFVEEAKKVIAQNI-----KLP  
PSYYITYGGQFENQQ-RANKRLSTVIPLSILAIFFILFFTKSIPLALLILLNIPFAVTGGLIALFAV-----GEYISVPASVGFIAL  
FGIAVLNGVVMIGYFKELL-----QGKSVEECVLLGAKRRLRPVLMTACIAGLGLLPLLF-SHSVGVSEVQKPLAIVVLGGL  
VTSSALTL LLLPPMFMLIAKKIKIV-----</seq-data>

</sequence>

<sequence seq-type="Protein">

<seq-name>o66770</seq-name>

<seq-info><length>1374</length></seq-info>

<seq-data>-----MFAVLKYRLLVLI ALVGTVIYGVYSFKKLPIDAFDPDTPVQVNIYTEAPGLSAEEVET  
LITIPVESVMNG-IKDVELVRSVS-LPGLSYVSVYFKEGTDVYFARRLVM EKLPDAKERIPEGF--NPVMGPNSTGLGNVLVYV  
LYDTSG-----KYTPQELKSIFQQWVARPLIMSAGGV EIVQFG-PELAYVIVPDFEKLIAYGITLEDLLN  
ALERNLLVGGGFYQS-----AEGDLVVRGLGRVYSKEDLLRIPVK-----VDEEKGVSVYL RDVA  
KVVEGE-----VPNRRGAFTMNGQ----EVQGNIVVKRIYENTKEVVDKVKEKLKEIQ--KILPEGVKIEHLYDQAYLTEKAV  
STIQKALFSGMLLVAIVTAF LMGNFR TSLIVISSLPLTLIAFIVMKETGMSGNLMTLGGLAIGIGMFVDSSVVVVENVYRHLT  
E-----NKSATKFSIILDSLKEVWRPVLFVAVLIIVIVFSPIFVFE---SVEGKFFKP--LAMTLIIALLASLFAVFTFIPALSYYFLKPG  
K-----ETYSKLMRAIHKVYEVLDFTFKLRTLLYLG  
VFISFVSLFLL-TRIGTEFAPELEEGAVIVKAF LDPNVSLEEGKRVATAIEREAMK---FPEVIRTFSTVGRAE-KG--EAADVNYI  
ETWILLKPQSEWET-----FKTREEFNEILRKRLE-----WLPASLGFTQPIKMRIDELLSGVRADIAIKIFGQDP  
EVLNELADKVKEIA-ESVP-GAVD---VQKEIQAGRLQLRIYPKWEVLERYGITVEEVL DVVKY NL---GGAPVGELQKD--TLLF  
PIVMTLPEDFRGDVSKLAKIPLFERHGK----ILTFGDVADLKVEPGLFVIRRENNIRFALVMLNV---EGRDTGSFVKELQSRIE  
NEV-----KLPTGYFITYGGQFENQQ-RAMKKLSIAPVVSIFLIFVMLYLNFN SVRDALVVM LNVPFAVIGGIIALYIS---  
-----GFNLSVPSAIGFIAIFGVATLNGVVLVSYIRQLLQ-----EELEIREAVKRAAILRIRPILITAITTLIGLIPLLV-IRDIGSE  
VQRPLATVVVGGIFTSTLLT LILPSVYELVYRKFPRA-----</seq-data>

</sequence>

<sequence seq-type="Protein">

<seq-name>ncca\_alcxx</seq-name>

<seq-info><length>1374</length></seq-info>

<seq-data>-----MIESILSGAVRFRWLVLFLTA VVGAIGAWQLNLLPIDVTPDITNKQVQINTVVPTLSPVE  
VEKRVTYPIETA IAG-LNGVENMRSLS-RNGFSQVTVIFKESNL YFMRQQVTERLAQARPNLPAGV--EPQMGPVSTGLGE  
VFHYSVEYEFDPDGK GAKVKDGE PGWQSDGSFLTERGERLTDRVSKLAYLR-TVQDWIIRPQLRRTTAGVADVDSLGGYVKQ

FVVEPDAAKMAAYGISFEELAQALEDANLSVGFANFIR-----SGESYLVRADARIKSADEIARAVIA-----  
-----QRQGVPIVTVGQVANINVG-----GELRSGAASRNGY-----ETVVGSAALMLVANSRTVAQAVGDKLEEIK--K  
TLPPGVVIVPTLNRSQVLMATIKTVAKNLVEGAALVVILFALLGNWRAAVIAALVIPLSLLISAIGMNGLNISGNLMSLG--A  
LDFGLIIDGAVIIVENSLRRLAERQHHEGRL---LTLKERLEEVISSREMRPTVYVYQQLVIFMVFLPCLTFQ---GVEGKMFSP--  
MVITLMLALASAFVLSLTFVPMVAVLLRKK-----V  
SEKEVRVIAVTKERYRPLLERAVARMPFLGAALVTLALAAMAF-TFVGREFMPTLDEQNLNLSSVRIPSTSIDQSVAIDLPLE  
RAVLS---LPEVQTVYSKAGTASLAA--DPMPPNASDNYIILPKKSEWPE-----GITTKEQVIERIREKTAP-----  
MVSNNYDVTQPIQMRFNELIGGVRSDVAVKIYGENLDDLASTAQKIAAVL-RKTP-GATD----TRVPLTGGFPTFDIVFDRA  
AIARYGLTVKEVADTVAAAM---AGRPSGQIFDG--DRRYDIVIRLPGQQRENLDVLGALPVMPLPAVEGQPRASVPLRQLVQ  
FRFTQGLNEVSRDNGKRRVYVEANV---GGRDLGSFVDDAAKRIAAEV-----KLPPGMYIEWGGQFQNLQ-AATQR  
LAIIVPLCFILIAATLYMAIGSAALTATVLTAVPLALAGGVFALVLR-----DIPFSISASVGFIAVSGVAVLNGLVLISAIRKRL  
E-----DGAAPNEAVIEGAMERVRPVLMTALVASLGFVPMAL-ATGTGAEVQKPLATVVIGGLITATVLTFLVLPVAVCGM  
VLRQKLEKPGGELLE-----</seq-data>

</sequence>

<sequence seq-type="Protein">

<seq-name>CNRA\_ALCEU</seq-name>

<seq-info><length>1374</length></seq-info>

<seq-data>-----MIESILSGSVRYRWLVFLTAVVAVIGAWQLNLLPIDVTPDITNKQVQINSVVPTMSPV  
EVEKRVTYPIETAIAG-LNGVESTRSMS-RNGFSQVTVIFKESANLYFMRHEVSRLAQARPNLPENV--EPQMGPVSTGLGE  
VFHYSVEYQYPDGTGASIKDGEPGWQSDGSFLTERGERLDDRVSRLAYLR-TVQDWIIRPQLRTPGVADVDSLGGYVKQF  
VVEPDTGKMAAYGVSYADLARALEDTNLSVGFANFIR-----SGESYLVRADARIKSADEISRAVIA-----  
-----HGKMSHHVGQVARVKIG-----GELRSGAASRNGN-----ETVVGSAALMLVANSRTVAQAVGDKLEQIS--K  
TLPPGVVIVPTLNRSQVLIATVAKNLIIEGALLVVAILFALLGNWRAATIAALVIPLSLLVSAIGMNQFHISGNLMSLG--ALD  
FGLIIDGAVIIVENSLRRLAERQHREGRL---LTDDRLQEYVQSSREMRPTVYVYQQLVIFMVFLPSLTFQ---GVEGKMFSP--  
MVITLMLALASAFVLSLTFVPMVAVMLRKK-----  
VAETEVRVIVATKESYRPWLEHAVARMPFIGAGIATVAVATVAF-TFVGREFMPTLDELNLNLSSVRIPSTSIDQSVAIDLPL  
ERAVLS---LPEVQTVYSKAGTASLAA--DPMPPNASDNYIILPKKSEWPE-----GVTTKEQVIERIREKTAP-----  
-MVGNNYDVTQPIEMRFNELIGGVRSDVAVKVYGENLDELAATAQRIAAVL-KKTP-GATD----VRVPLTSGFPTFDIVFDR  
AAIARYGLTVKEVADTISTAM---AGRPAGQIFDG--DRRFDIVIRLPGEQRENLDVLGALPVMPLPLEGQARASVPLRQLVQ  
FRFTQGLNEVSRDNGKRRVYVEANV---GGRDLGSFVDDAAARIAKEV-----KLPPGMYIEWGGQFQNLQ-AATKR  
LAIIVPLCFILIAATLYMAIGSAALTATVLTASPLALAGGVFALLR-----GIPFSISAAVGFIAVSGVAVLNGLVLISAIRKRL  
D-----DGMAPDAAVIEGAMERVRPVLMTALVASLGFVPMAL-ATGTGAEVQKPLATVVIGGLVTATVLTFLVLPALCG  
IVLKRRTAGRPEAQALEA-----</seq-data>

</sequence>

<sequence seq-type="Protein">

<seq-name>czca\_alcsp</seq-name>

<seq-info><length>1374</length></seq-info>

<seq-data>-----MFERIISFAIQQRWLVLLAVFGMAGLGIFSYNRLPIDAVPDITNVQVQVNTSAPGYSP  
ETEQRVTVPIEVVMAG-LPGLEQTRSLR-RYGLSQVTVIFKDGTDVYFARQLVNQRIQEAQDNLPEGV--VPAMGPISTGLGE  
IYLWTVAEAE---GARKADG-----TAYTPTDLR-EIQDWVVRPQLRNVPVTEINTIGGFNKQYLVAPSLERLAS  
YGLTLTDVVNALNKNNDNVGAGYIER-----RGEQYLVRAPGQVASEDDIRNIIVG-----TAQ  
GQPIRIRDIGDVEIG-----KELRTGAATENGK-----EVVLGTVFMLIGENSRAVSKAVDEKVASIN--RTMPEGVKIVTVYD

RTRLVDKAIATVKKNLLEGAVLVIVILFLFLGNIRAALITATIPLAMLFTFTGMVNYKISANLMSLG--ALDFGIIDGAVVIVEN  
CVRRLAHAQEHGRP---LTSERFHEVFAAAKEARRPLIFGQLIIMIVYLPFALT---GVEGKMFHP--MAFTVVLALLGAMIL  
SVTFVPAVALFIGER-----VAEKENRLMLWAKRR  
YEPLLEKSLANTAVVLTFAAVSIVLCVAIA-ARLGSEFIPNLNEGDIQALRIPGTSLSQSVEMQKTIETTLKAK--FPEIERVFAR  
TGTAETIAS--DPMPPNISDGYIMLKPEKDWPE-----PKKTHAELLSAIQEEAGK-----IPGNNYEFSQPIQLRF  
NELISGVRSDVAVKIFGDDNNVLSETAKKVSAYL-QGIP-GAQE---VKVEQTTGLPMLTVKIDREKAARYGLNMSDVQDAV  
ATGV---GGRDSGTFQFQ--DRRFDIVVRLPEAVRGEVEALRRLPIPLPKGVDARTTFIPLSEVATLEMAPGPNQISRENGKRI  
VISANV---RGRDIGSFVPEAAEQSQV-----KIPAGYWMTWGGTFEQLQ-SATTRLQVVVPVALLLVFVLLFAMFN  
NIKDGLLVFTGIPFALTGGILALWIR-----GIPMSITAAVGFIALCGVAVLNGLVMSFIRSLRE-----EGHSLDSAVR  
VGALTRLRPVLM TALVASLGFVPMAL-ATGTGAEVQRPLATVVIGGILSSTALTLVLPVLYRLAHRKDEDAEDTREPVTQTH  
QPDQGRQPA-----</seq-data>

</sequence>

<sequence seq-type="Protein">

<seq-name>Q9RLI8</seq-name>

<seq-info><length>1374</length></seq-info>

<seq-data>-----MFERIIQFAIEQRWLVLLAVLGMAGVIGSYQKLSIDAVPDITNVQVQINTAAPGYSPLE  
EVEQRITYPVETVMAG-LPGLQETRSLR-RPGISQVTVIFEEGTDIYFARQQVNERLSTAREQLPEDI--SPTLGPSTGLGEIYL  
WTVEAEE---GATKEDG-----SAYTPTDLR-TIQDWIIRPQLRNVKGVAEINTIGRYAKQFLIAPDPKKLAAYKLT  
LGDQLNAVLRNNENVGAGYIER-----RGEQLLIRAPGQVKDMDDIRGIIVS-----NVDGVPI  
RIRDVAEVGLG-----KELRTGRATENGR-----EVVLGTVFMLIGENSREVAQAVGQRLEEIN--RTLPGVKAITVYDRRTL  
VDKAVATVKKNLVEGAALVIAVFLFLGNIRAALITATIPLSMLFTFTGMVGNRVSANLMSLG--ALDFGIIVDGA  
VIVENAIRRLAHAQAHHGRQ---LTRAERFHEVFAASREARRALIFGQIIIMVVYLPFALT---GVEGKMFHP--  
MAFTVV TALLGAMILS VTFVPAALFITGK-----VKEENFVMRRARLAYE  
PALRWVLGHRALVGGALGVILLTALVA-SRMGSEFIPSLSEGDFAMQGLRVPGTSLTQSVEMQQTLEKMLMGK--  
FPEID GFFARTGTAEIAS--DLMPNNSDSYVMLKQSQWPD-----PKKSREALLEELQAAALE-----  
VPGSVYEFSQ PIQLRFNELISGVRSDVAVKIFGDDMQLVNDTAEKISKVL-QGID-GASE---VKVEQTTGLP  
VLTVDIDRDKAARFGLNVGD IQDTVATAL---GGRNAGTLFEG--DRRFDIVIRLPETLRADLPALS  
NLLIPLPPNRLARIDFIPLSDVARLDLSPGPNQISRENGK RRIVVSANV---RGRDIGSFVLEAQQKLQDGV  
-----KIPAGYWTTWGGQFEQLQ-SAAKRLQVVVPVALLLVFTLLFA MFNNVKDGLLVFTGIPFALT  
GGVLALWLR-----GIPLSISAAVGFIALSGVAVLNGLVMISFIRNLLQ-----EGRSLD  
QAVWEGAITRLRPVLM TALVASLGFVPMAL-ATGTGAEVQRPLATVVIGGILSSTMLTLVLPVLYRWTHGRDAG  
PREETP AAG-----</seq-data>

</sequence>

<sequence seq-type="Protein">

<seq-name>hela\_legpn</seq-name>

<seq-info><length>1374</length></seq-info>

<seq-data>-----MLEKIIRFSLKHRWFVLLFTLVIAILGVYNFQRLPIDAVPDITNVQVQINTQASGYSPFEV  
EQRITFPIELAMSG-LPSLDYTRSLR-RYGLSQTVVFKDGTNIYFARQLINERLQEVKDKLPPGV--ETTLGPSTGL  
GEIFMYT VTNKP---NVPIS-----QHYNPTELRTIQDWIIRPQLRNVEGVAEINTIGGYEKQFHITPDPSKLV  
RYRLSLND VVEALERNANVGAGYIET-----NGEQNLIRVPGVQVMADIENIVIA-----SFGPTVRI  
R DVAEVALG-----KELRTGAATENSK-----EVVLGTVFILMGENSRTVSERVAAMKDIN--KTLPEGVEA  
ITVYNRTTLVN ATINTVKNLLEGALLVCVILFLFLGNIRAALITAMVIPLSMLLTITGMVENQISANLMSLG--  
ALDFGLIVDGA VIVENCIKHL AEQQHALHRV---LNLEERLKVISYATTEVIRPSIFGVFIITVVYLPILTLT---  
GVEGKMFHP--MAQTVIIALLASMLFALTFVPAAL

VAIFLRGH-----LQEKENWLVHYLSLGYAKVLRRCF  
HARRVVISAVALVVVSLGIA-FHLGGEFIPSLDEGDIAMHAMRIPGTSLTQAITMQDLVEKRIRQ---FSEVKNVFAKLGTAE  
VAT--DPMPPNVADTFIILKSRKKWTN-----PKKTKPGLVQEIESAVQQ-----IPGNNYEFTQPIQMRFNELIS  
GVRSDVAVKVFDDMDTLLKTAEAISAQL-KQVP-GAAD---VKVEQVSGPLLTVEINRDVLARYGLQIGTVQEAVVIAT---  
GGKKGGEFEG--DKRFDIVVRLPESLRSDPNVLRQIFIPLPSKDGEQHFIPSEVSLRSESPNQISRENGKRRVVVTANV--  
-RNRDLSSFVSEAKKRIDGQV-----KLPSTGYWITWGGQFEQLQ-SAYQRLQIVVPITLLGIFLLLIFISFGKVRDALLVFT  
GIPLALTGGVFALWLR-----GIPLSISAGVGFIALSGVAVLNGLVMITFINKLREQ-----KKVYLKDAVLQGSRLARLRP  
VLMTALVASLGFVPMAL-ATGTGSEVQRPLATVVIGGIISSTFLTLLVLPGLYVVFHGRRRKKGQSKSEPQEQIM-----  
-</seq-data>

</sequence>

<sequence seq-type="Protein">

<seq-name>q55935</seq-name>

<seq-info><length>1374</length></seq-info>

<seq-data>-----MLNLTLLNQIKTSIAQRWFIVIAAIGITLWGIISVGQMPLDVFPEFAPPQVDIHTTEAPGLAP  
EEVETQITVPIESAVNG-LPGVTTVRSSS-KVGLSMVSVVFDQDADVYKARQTVTERLQQVTNQLPEGSH-PPEISPLVSPGL  
TIVQYAFTIKDGG-----SSNLMDLR-RLETTVGNQLLSVPGVSQVTLYGGDERQEQLVDPKALRALK  
VSLNEVTQASAEANSNAPGGFLIG-----GGQELLVRGLGQMMSIEDLRRSVVK-----VVDG  
KPILLEDVAEVKTG-----SALKRGDGSFNGQ----PAIVMMVNKQPDVDTPTVTKAVEAVVESLK--PTFPADVQIAQTF  
RQANFIDSAIRNVSTSLLEGIVVSVIMLIFLMNWRTAAITLTAIPLSLLIGLMFMKAWGLGINTMTLGGVVAIGSVVDDSDIV  
DMENCYRGLRTNQAE-----GNPKHPLRVVYETSVEVRLAVIFSTVIIVVVFAPIFSLT---GVEGRIFAP--MGLAYLLCIGASTL  
VAMTVSPALCGILLAN-----QRLPQEGTFVSRWAE  
RLYRPLLNFSLRAPQVILSIALIAVIASVSLV-PSLGRVFLPEFREKSMVNSMVLFPVSLDMTNRAGMALFNKLD---NPLYE  
WVQIRAGRAGDA--DGAGVSMHVDEL-SDEALD-----REASVKELRKAFNQ-----LPGVASNMG  
GFISHRMDEVLSGVRSAIAVKIFGPDKELRAIGEQQEAM-KTVP-GIVD---LQLEPQLPIRQVQIHYDRAAAAQYGLRMA  
DISAVVETAL---NGRIVSQVPED--QQLVNVVVMLPETERNSLDAMGAIPSTPTGQ----MITLGDVAKIDYGMGANVVNR  
EDVSRLIVVSANV---AERDLGSVVEDVQAQIKEKV-----QLPQGYFIEYGGQFESEQ-RATNSLLLFSVAALVIGILMF  
FSVKSLPATIAIMINLPLALIGLLSVVFT-----GGVISIASLVGFITLFGVAVRNGLLVDNYNQKFA-----QGMKLN  
ETIFKGSMEVNVAILMTALTSALGMLPLAT-ASSAGNEILQPLAIVVLGGLCTSTALTLVLPALYAKFGKWLMPKQPTNGD  
HIAPFVRNDRVSTQKSHF-----</seq-data>

</sequence>

<sequence seq-type="Protein">

<seq-name>O31501</seq-name>

<seq-info><length>1374</length></seq-info>

<seq-data>-----MTSQSIKNVMEDMMNHVINFLKNKFAVWLMTIIVTAAGLYAGMNMKQESIPDVNMPYLTIS  
TTPGATPSQVADEVTKPVEQAVQN-LDGVSVVSTST-YENASSVMIEYDYEKDMDKAKTEAAEALENV--NLPDDAK-DPE  
ISRYSLNSFPILTLSSVSSDK-----DNLQELT-KQVEDSLVSKLEGIEGVASVQVSGQQVEEVEFSFKED  
KLKEYGLDEDTVQVIQGSVDVTTPLGLYTF-----GNEEKSVVSGDIETIKDLKNMRIPTASASSAGSSAASQAGAQAQA  
QSAQAAAQV-----QQSASTAVPTVKLSDIATIKD-----VKKAESVSRTNGK-----DSIGINIVKANDANTVEVADDVKAEL  
KKFK--EDHK-GFNYSATLDMAPITQSVDTMLSKAIFGAIFAIVILLFLRDIKSTLISVVSIPSLLIALLVLQQLDITLNMITLGA  
MTVAIGRVVDDSDIVVIENIYRRMRLK-----DEPLRGKALVREATKEMFKPIMSSTIVTIAVFLPLALVG---GQIGELFIP--F  
ALTIVFALAASLVISITLVPMLAHSFLFKSLTGA-----PIK  
AKEHK-PGRLANIYKKVLNWALSHKWITSIIAVLMLLGSFLV-PLIGASYLPSEEEKTMQLTYSPEPGETKKEAENEAEKAEKI

LLD---RKHVDTVQYSLGSGSPLA----GGDSNGALFYIKYESDTP-----DFDKEKDNVL-----KEIQKQ  
SDRGEWKSQDFSSSGNNNELTYVYVGDSSENDIKDTVKDIEKIM-KDEK-DLKN----VNSGLSSTYDEYTFVADQEKLSKLG  
ASQISQALMSQT---SQEPLTTVKKD--GKELDVNIKTEKDEYKSVKDLENKKITSATGQ----EVKIGDVAKVKEGSTSDTVSKR  
DGKVYADVTEGEV---TSDNVTAVSAAIQKKIDKL-----DHPDNVSIDTGGVSADIA-DSFTKLGLAMLAAIAIVYLV  
TFGGALAPFAILFSLPFTVIGALVGLYVS-----GETISLNAMIGMLMLIGIVVTNAIVLIDRVIHKEA-----EGLSTREA  
LLEAGSTRLRPILMTAIATIGALIPLALGFEGGSQVISKGLGVTVIGGLISSTLLTLLIVPIVYEVLA  
FRKKKPGTEEE-----  
-----</seq-data>

</sequence>

<sequence seq-type="Protein">

<seq-name>O51165</seq-name>

<seq-info><length>1374</length></seq-info>

<seq-data>-----MLVKRIVGKPTMLILFSLLLMISLYTFSRLKVDLLPGIDIPQISIHTVYPGASPREVEES  
VSRVLESGLSS-VKNLKNISVS-SKESSTVSLEFYHGTDLDLVNEIRDALELVKSSLPSKSQ-TPRIFRYNLKNIPVMEIVINSV--  
-----RPVSELK-RYADEIHKPLERLDGVAIVTVNGGSKRVLIEVSQNRLESYGLSLSRISIIASQNL  
SAGNILE-----NNLEYLVEVSGKFKSIEEIGNVVIAYKIPDISSGINLS-----PIEIKLKDIANIKTD-----  
FEDLSEYVEYNGL----PSISLSVQKRSDNSIAVSNVVMNEIEKLN--LSMPKDMKLEIASDSTDFIKASISTVVNSAYFGAMLA  
IFVIFFLRSFRATIIIGISIPAIVLTFLCLMYFVNISLNIMSLAGLALGIGMVVDCSIVVIDNIYKYR-----QKGAKLISSSILG  
AQEMMLPITSSTFTSICVFGPFLIFKSELGVYGDFFKD--FTFTIVISLGVSLVAIFLVPVLSHYVGLYTSFQ-----  
-----KNIKNAFIRKIDAFFASIYFLEFLYINLLNIVLNHKLIFGLIVFFSFIGSLLG-LLL  
DVTTFTRGKENSITINLNFPHKTNLEYAKFYNSRFLEIVKS--EAKGYKSIIATL-RADR-----ITFNVLFPKKEESRDNL-----  
--TQSDYDSIKYKIMNRIG-----NLYPEFNIEPS-ISGNALGGGD--SIKIKISANDFEYIKDYGKILVSMMLKKEIP-ELV  
N----PRLSISDFQLQIGVEIDRALVYNYGIDMNTILNELKANI---NGVVAGQYVEK--GLNYDIVLKLDRMDVKNLKDLEKIFIT  
NSSGV-----KIPFSSIATFEKTNKAESYRENQALTYLNAI--SPDDNLTQVTAKVVDFFINNKV-----PHKEGITLKEG  
EYNEFS-NIMNQFKIIIMMAIIVVFGIMASQFESFLKPFIIIFTIPLTAIGVVLHFLA-----GEKLSIFAAIGMLMLVGVVVN  
TGIVLVDTYGLLIK-----RGFGLREAIIESCRSLRPILMSSLTSIIGLIPMAF-SSGSGNELLKPIAFTFIGGMTASTFLTFFIP  
MLFEIFPTCFKFQI-----</seq-data>

</sequence>

<sequence seq-type="Protein">

<seq-name>Q9WYK5</seq-name>

<seq-info><length>1374</length></seq-info>

<seq-data>-----MKIAEISSKRPIAIFMLLMVAVFLGFISFQHLKLDLLPQIEYPYAVVITTYMGAGTEEVE  
ELVTKPLEGYISS-TPGVRRFTSMS-MDSVSFILVEFDWNVKTSEAVGRLSRYVDLATRDLPEGA--NPVVVEFDPSLLPVYAF-  
-STED-----DYED--VVSKIKRLPEVASVEVMGKPEKIVEVILDQEIKRFDVDP-SLIETILSGNL  
VYPFGYVSDS-----EGNIYPVSVDGRFENIEDLKNTIVGFRGVKYQSLQGV-----PNILVPVRLRNIAEV  
NIT-----NESVQGEVRVNGK-----KASLIAIYKRSANTVKTVREIKRILRDSK-----INYIEAMNQAYYTERAIDNLLKNL  
LYGFIAAFVVVLIFLKDFTSTIVTSFSIPLSLTITFVLLYAFGLNLDTLTGGLIMALGMLVDNSIVVFENIYRHR-----SLGD  
PIPDAARKGAGEVWLAILASTLTTVSVFLPIVFFT---GFVVRLFY--FAIAFVFALSSSLFVSTVVVPAGTRWIKPRRG-----  
-----KLTEALQKHRYKALEWCLKRKKLVLVISFALVAISV  
IYL-LSKPLGFLPSFQTNLMVIDVKLPSQSSYEKTAEAVKQIEDYLNEHRNEYKISSFYAEVGITNVYSQIMGRGQNEARIMVN  
LGGSRREFA-----KNREKLKNAISQL-----NIPEAKIEVLEQS--QQIYEILGY--PVTIEVRGDDLSLIQEKAKE  
IFERL-RKLQ-EVKK---IQIRNSFEKEVLHVKIDRNKALMNGVVAGQVFLDLQTYL---LGKKIGTLRTE--EGTLPVLLKAKFLS-  
-PEDLSKISLTGLKG-----DVPLGVVSNISRETLPSIVEHSDGERVVYVDLVS---VEGSIGEVAKKVEKLLNEI-----DLS-



GVKVEITGQKSFMD-EAFSELQYVVYIAIALVYMILAAQFESFVLPFVIFFTIPFAVVGVAFAVFN-----GYSLNVPVLV  
GLLTLSGTVVNNNAIVMLTRIEQIR-----QEKGLLEATLEGAQSRLRPILMTTFTTIVALLPTAL-SHAEGSEIESPISWVVF  
GMLISMLFTLFVIPVIYAAIRRKVRV-----</seq-data>

</sequence>

<sequence seq-type="Protein">

<seq-name>o69238</seq-name>

<seq-info><length>1374</length></seq-info>

<seq-data>-----MGIVRFALRLPHTFYVLAALILFLGGIAIRSMPTDIFPEIRIPVVTVIWRYTGLSTPEME  
QRVSTYSQYSISANVTGIKNIEAQT-LNGLSVQKIYFQPDVNLDAISQIVSATNAIRALMPPGIQ-PPIIVQFNASSVPVLQLS  
LESNS-----LNEQQLY-DFGIYRVRQQLAPVPGVTLPTPAGGKYRQIMVDIDPNKLLSRGLTPLDIV  
NAVNTQNLTLPTGTTKI-----GDTQYTVRTNATPATIQDLNMIPVK-----FANGATIFLKDV  
AQVRDG-----AQVQQNIVREDGH-----RAVLLSVIKNGNASTLAVVNGVKAALTSIR--ASAPAGLKINELFDQSIFVTHS  
VNGVLRREGAIAAGLTALMILVFLGSRWSTLVVLSIPLAMLSSLVLYFLGETLNTMTLGGLALAVGILVDDSTVTIENTPALD  
RRGHA-----VVGSDPARSRDRYSDVGLHARDQLRVHLGRIS-----GRPGQIFVQRRLASPWCSRCWRRTDCRGRST  
PITIGLLKGERRHGEGERSN-----IFARASAAFERGFELRDGY  
SDLLTLLRRRVIVPVAVLVLALGATMF-VYVGRDFYPLIDGGQIQLHVRAPAGTRIERTEAIFQAVEDKIRE--VIPKRDRALI  
VDNIGLPAR-----PYNLAFTDGSTIGVNDGTILVSLK---DGHKPTADYIRKLRQVLPS-----AFPEDTFYFQAAD-IV  
TQILNFGFLPAQIDVRTVGYGSNNL-AVAKELQKSL-AAIP-GVVD---AHLQQEVDAPAFYADIDRTRAAQLGLNASTVATNI  
NVSLSSSAQVSPNFWTDPTSGIPYLAQVQPEYRANSLNSLGNTPVSASLAASGQTVPGLLSNVATFKRGTVPNTLNQANV  
QPVFDVYASV---QGRDLGSVASDIDKVTSTLQK-----QLQPGNSIQVLGQIQSMH-QSFRDLGIGLLFAAILVYLLMV  
VNYQNFQDPFVIMALPATFCGIVTMLFVT-----GTTLNVPSLMGAIMAVGVASANSILLVTFARDEQL-----KG  
HSAFQAALSAGRTRIRPVLKTAAMIVGMIPMAI--GGPGEEQNAALARAVIGLLFATPTLLIVPYLFAMLRKGNKGKPR  
HGVFEEQPE-----</seq-data>

</sequence>

<sequence seq-type="Protein">

<seq-name>p74461</seq-name>

<seq-info><length>1374</length></seq-info>

<seq-data>-----MSSPNSVFSLSGLAIRRHIALMLTLAIIVLGVFAVFSLPVDLLPSITYPRIGVRLDAPGVSPEV  
AVDEITRPLEAALSA-TEGVVQVYSQT-REGQISLDLFFEPGGNIDQALNDATATFNARNQLPDDLE-TPRLFQFDPSQLPV  
YEFAVTSPE-----LSGPSLR-VFAEEELARELGVVPGVASVNVSGAAQEEVRINVDLQRLQRSGVSLT  
QVLDALQSRNVDISGGRIVG-----TESEPLTRTVGRFASAQEIIDLVVGTVSGLEDQS-----AQKV  
YLRDVATVIDG-----TEEERIFVTLNGN-----PAVKVSVQKQPEANTIEVVDGVKKRLEELRTEGIIPQAAELTPTLDDSVFI  
RNSVNNVVVSLIGTVLAAIAVLLFLGSLRQTLIIVLAIPLATMAAIVMKAFLSLNVFSLGGLALGVGIVVDNSIVMLETIAE  
GAGMTPGKVNPLP--LTKGEMRNQAIASSQTVESALVASTSTNLVAVLPFLMIG---GFIALIFNE--LILTISFAVAASILVAVTL  
VPMAASRLLAIRRRSGLGN-----WLFFREFNRRFAGATAA  
YARFLSILIRHRLVAVASIFIVFGGSSLWMIGQIPQEILPRINTGQASMFAQFPPGTPLEENQRLMAIVDDILIN---QPETEYAF  
TTVGGFLFGSN-VNANALRSSSTITLKPNTDVE-----AFTERVTAELEALNL-----VDIRLRMAPGQLRGLI  
LSNSPLRNVDVDVVLQGNDAVLDEAGRAVLAEL-GEKV-TLAR----FRPDADPRQPEVQIRPDWQRATELGLTTQAIQGT  
VQTAL---DGAVPTQLQRE--NRLVDVRVKLDNDLLSGPGDLAQIPLFIDGDR-----PIRLGDVATIDQGRAPGEIQRINQRPVF  
LIAGTL--VEGASLSEALTEVDQVLSAME-----FPPGVSRLPSTAAASNE-QLQSSLVILGGLAAFLVFMVMAVQYNSL  
LDPLVIMFTLPLALAGGILGLYVT-----QTAIGATVIVGTVLLVGVVNNNAIIMVELANQIWAE-----EGISREAAILRA  
APQRLRPILMTTITTVLGMFPLAL-GIGQGSSELLQPLGIVVFSGLSLATLLTLFLIPCLYVLLHQWEGVDIEKVKTDLESRLTEED

VPTKIQ-----</seq-data>  
</sequence>  
<sequence seq-type="Protein">  
<seq-name>Q9RWC9</seq-name>  
<seq-info><length>1374</length></seq-info>  
<seq-data>--MSTHFDEAEFRSGGTLPDGTPEPQIHPLVRFVSKNYVFSIGIFVMVLLGLVATFRLGVPELLPNFEVPVLAVS  
TSYPGANPDQVDREVSRRVEDAVST-LSGVTDINTTS-VSNQSAVVITFSDSTNIDSAANSVSQAVAAIRGTLPDGAE-APVV  
QKFDPNAAQPILTALLGGA-----ARPSEVT-TFAEDTLVPRLQRVEGVADVTVTGGPERQVQVLLD  
PARLQGFDLAPARISGAIGSSALDLPAGTLDR-----GGSTTSYSTRNTPRSAADVARIIVD-----  
-----PSTGLRVSDVATVRDA-----SAAANSYARVNGQ-----PAVLLGVRKASGTNSVAVTDNVRAAMEAQK----LPPGY  
RLTLASDTTSTRATVNDTREFLIAVAVGLICLLFLGRLNTVFAVILAIPISISAAPLLFGTLGFTFNIITLLAIIAIGIVVDDSI  
VAENVQRYR-----DLGYSPLRSVLLGGSEVFSAVTAASFLLAVLIPLSLMP---GILGQFFKQ--FGLGIAAAIVLSWLES  
LFLTVMAYTREPARIWADLPAVLRRLPLTFRESLSGVKTFWGLLGLALAGAATYFGLHRAGLPAAAAGVLCVLLAPVVLT  
VVRYLLTVLYALLEALTETLHTLTLSGVNRAAKAYARSLAGALRRPGVVMVAVGLFLLSAPLAL-RGLGFVFPASDSGIATISL  
TLPVGTPLAVTDELTRQVEDKLLA---HREVKLVQTASGSSVGLG-ANANTSDLTLTLPKAERPG-----IDELLER  
YRRELAP-----LVARYPGTELLVAGQAVGPGDSSDISLALTAPSQSLEERNRAVVRL-SADP-NIRT----VKSSLS  
ATRQERTFVPDPLRLSGTGLSASDVAQALRTYN---DGTVAGQVRDG--DRSVDIVVRLDPALVSGEQSLLSQTLYSQALGA--  
--NVPLSSLGRFEVAQAPATLRRFNKAYTATLDINLV-SGGPNPFAYQKDVQQRVEKAGLLA-----GGVTLGNANSF-GS  
AGLTG-DLLFYGPILMVAAVLLTYLVLSQFNSFRYPIYLLPIPLAIVGALWTLHLF-----GVNLDVITVLGMVILLGLSTK  
NSILYLEFVTERA-----RVLPLHEALLEAAELRFRPILMTTLTVLVISIPLIL-GHGEAEFRRLGLGIVILGGVVTSTLLTFYVV  
PSVFWQFEKKRMATPQPKLEPVAGD-----</seq-data>  
</sequence>  
<sequence seq-type="Protein">  
<seq-name>o66916</seq-name>  
<seq-info><length>1374</length></seq-info>  
<seq-data>-----MYGLAGRLANFFIDSKL-TPILILVSLALGLFAVLTTPREEEPQIVVPMIDIFIPYPGATPEEVE  
ARVVFPLEKILWE-LKDIEYIYSAS-TNDMGIVTARFYVGTDPVKALVDLNSKMMSALDKAPPGVILPPVRLMSIDDVPILT  
TLWGEN-----YDWYELR--RLAATLQNEIKKIENVANVYLIGGRPRQIRIILDPAKMAAYGISPLYIDQ  
LLRSANAQAISGKINK-----GNMEYLVKTGPFKSVRDVENVVVG-----VRNGRVIFLKDVA  
KIVDGPSEIKDYVFFGIGEAEHEYKGIKPGELYPAVTIAVAKRGTNAVVAEQVIEFVESLK-GKVIPSDVNITVTRNYGET  
AQEKALLEHLFIATFSVLLIAVSLGV-REAVVGLAVPVTLALFLNEMYGFTLNRVTLFALIFSIGILVDDAIVVVENIHRW  
FE-----MQKLPPRDAIVHATDEVGNPTILATFTVIAALMPMAFVT---GMMGPYMRP--IPINASVAMFFSLLVAFIVTP  
WAAYHILKKE-----REHEEINIRKTLFWKLYCHIMYPLL  
ASKLKRYAFYLFVLALMGGSVGLLFTKTVLVKMLPYDNKSELEIVLDMPEGTTLEDTLKVAKEIADYVGR---YSIVTDYQIYAG  
TAAPFT-----FNGLVRHYLRQASNLAE-----IQVNLVGKHDRDLQS-----HEFAKLIRPKVHEIASKYGAKYVAVVE  
VPPGPPVLSPIVAEVYAPDMKVQREFAWRVLKIF-KDSP-AITD---EGIYLEYPAPMIRFEVKEDKVKLAGLTKQEVVYTLKA  
LI--GGWQAGIMQTTD--TEHVPIIIRLDEKYRV-PELLKNVKIPNREGK----LIPLSELVEIKEGPIPETIYHKNLRRVIYVIGDVA-  
GREEAPIYGILDVRDKILNIENPYGEVWMSLPVLEDRVYVVKWDGEMHITL-EVFRDLGLAFVAVFVMYVLLVGLWFKD  
FRIPGIILAPIPLTLVGIIPGHWLMKIMG-----NVFFTATSMIGFIALGGIIVRNSILLVDFAEQRLK-----EGLPVHVAVV  
EAGVIRTRPILLTAAAVIIGAFVIIF-----DPIFNGLAISLIFGTIGSTTLTLVLIPVMYYASKIKRMPPEACPTPEMIKRDLMAD---  
-----</seq-data>  
</sequence>

```
<column-score>
<colsko-name>coreblock</colsko-name>
<colsko-owner>0</colsko-owner>
<colsko-type>int</colsko-type>
<colsko-data>00000000000000000000000000000000000000000000000101111111111111
111111111111111111111111111111111111111111111111111110000000000000
000011111111111111111111111111111111110000011110000000000000000000
000000000000000000000000000000000000000000000000000000000000011111
111111111111100000011111111111111111111111111111111110000000
00000000111111111111111111111000000000000000000000000000000000
00000000000000001111111111111000000000000000000011111110000011
11111111111111111111111111111000000000111111111111111111111111
11111111111111111011111111111111111111111111111111111111111111
11111111111111111000000000000000000000000000000000000000000000
00000000000000011111110000111111111111111111111111111111000000
0000000000000000000000000000000000000000000000000000000000000
00000000000000000000000000000000000000111111111111111111000000
0000000000000000111111111111111111111111111111111111111100000
0000000000000000000000000000000000000000000000000000000000000
0001111111111111111111000000000000000000000000000011111111111111
11111111111111110000000000000000001111111111000000011111111110
00000000011111111111111111111111111111111110000000000000000
0000000000000000000000000000111111111111000011111111111111111
1111111111111111111111111111111111100000000000000011111111111
1111111111111111111111000000000000000011111111111111111111111
11111111100000011111111111111111111111111111111111000000000
000000000000000000000000 </colsko-data>
</column-score>
</alignment>
</macsim>
:~::~:~:
dtd_core-block.xml
:~::~:~:
<?xml version="1.0"?>
<!DOCTYPE macsim SYSTEM "http://www-bio3d-igbmc.u-strasbg.fr/macsim.dtd">
<macsim>
<alignment>
<aln-name>1</aln-name>
<sequence seq-type="Protein">
<seq-name>Q54756</seq-name>
<seq-info><length>1354</length></seq-info>
```

```
<seq-data>-----  
-----MLLGQSQLRWLPGLRSLHYRRA--WLRGDVLAGVTVAAYLIP  
QCMAYGQLA---GLPAIVGLWAILIPLFLYTFFGSSPQLSVGPESSTAIMTAVAIAPVAAQTDL-----  
-----SYLLAAMVALLVGIVFLVAYSLRLGFLADLLSKPILIGYMAGIGLVMISGQLGKTSIGIPI-----TATKPL  
EEFQQFFAGL-----GQCHWPTVGVSVILVLLFLFGVQKK-----FRTAPGPLLAVLLATLFVALFQ-----  
-LDQQGVQVIGTIPA-GLPRWQWPTLP-----WQQWPTLTASAIGVALVGYSDNILTARAFVR-HRYEIDANQELLA  
LGIANVGNSTFFQCFPIGSTRVIGDA-LGSRTQLFSLVSLGTVLLVWFFRPVLAMFPQAALGAIVIYAATKLIDL---REFYR  
LRRYRPSEFWLALITAAGVLGTN-MLIGVGVAVSLSVIDLFARVARPHAAILGEIPGMAGLHDIEDW-----  
-----PQAQTFPGLVIFRYDAQ-LCFANAEDFKRRVLLAIA-----  
-----TAPQP-VQWLLLNAEAIIN--LDVTA AEKLELLRELQQR---GVTLTIAARA-  
KQELIAELDRVGLV-EQIGGE-HFYPTLPTAIAAFQQFRQSQIADEPPLTAS-----  
-----</seq-data>
```

</sequence>

<sequence seq-type="Protein">

<seq-name>P71997</seq-name>

<seq-info><length>1354</length></seq-info>

```
<seq-data>-----  
-----MIPTMTSAGWAPGVVQFREYQRR--WLRGDVLAGLTVAAYLI  
PQAMAYATVA---GLPPAAGLWASIAPLAIYALLGSSRQLSIGPESATALMTAAVLAPMAAGDLR-----  
-----RYAVLAATLGLLVGLICLLAGTARLGLFLASLRSPVLVGYMAGIALVMISSQLGTITGTSV-----EG  
NEFFSEVHSFATSV-----TRVHWPTFVLAMSVLALLTMLTRW-----APRAPGPII AVLAA TMLVAVM  
S-----LDAKGIAIVGRIPS-GLPTPGVPPVS-----VEDLRALIIPAAGIAIVTFTDGVLTA RIFAAR-RGQEVNANA E  
LRAVGACNIAAGLTHGFPVSSSSRTALADV-VGGRTQLYSLIALGLVVIVMV FASGLLAMFPIAALGALVVYAALRLIDL---S  
EFRRLARFRRSELMALATTA AVLGLG-VFYGVLA AVALSILELLRRVAH PHDSVLGFVPGIAGMH DIDDY-----  
-----PQAKRVPGLVVYRYDAP-LCFANAEDFRRRALT VVD-----  
-----QDPGQ-VEWFVLNAESNVE--VDLTALDALDQLRTELLRR---GIVF  
AMARV-KQDLRESLRAASLL-DKIGED-HIFMTLPTAVQAFRRR-----  
-----</seq-data>
```

</sequence>

<sequence seq-type="Protein">

<seq-name>P72770</seq-name>

<seq-info><length>1354</length></seq-info>

```
<seq-data>-----  
-----MIKQIFPIFQWLPNYHPS--WLKADV VAGLT LAAYAIPVAL  
AYGSLA---GLPSEVGLYCYMLGAVGYAFFGTSRQLALGPTS AISILVGVSLAPLANDDAG-----  
-----RYLILASSTAILVAIICLLAWLLKLSQIVNFISEPILTGFKAGAALQIASTQLPKLFGVPS-----GGSNFFSRIW  
DLFHHW-----QEIQPATLLVGG LALVLLVMGDRL-----WPSKPISLMVVILAIIVVMGITN-----LL  
EQGVKVVGEIPQ-GLPSFGMPHWS-----FSDLDSLLPLALACFLLSYIEGISTARSFAIK-HHYRINPEQELLAIGAANLA  
AGLGQGYPIAGGLSQSAVNEK-AGAKTPLAIIITACIIAIVLLFFTGLFSNLPEAILGSSVVLVAVKGLINI---PELQHLKKIAPLEFK  
VSLIALFGVLCFG-VLQGVLLAAIASILFLIHIISYPSSAVLGRIPGSDQFSDLERH-----
```

-----PENLVISGVLIYRINGP-ILYFNINNIESDLFNHLA-----  
-----QQQEP-VELVIFEMGTSPG--IDTPAARWFKTLSQSLNQQ---GITLKLVA-SGFVRDRDLRAEGLE-G  
EVGTF-RRLDTVDSLISEFNCQRYSDLPHTEND-----  
-----

-----</seq-data>

</sequence>

<sequence seq-type="Protein">

<seq-name>O04722</seq-name>

<seq-info><length>1354</length></seq-info>

<seq-data>-----MKERDSESFESLSH  
QVLPNTSNSTHMIQMAMANSASSAAAQAGQDQPDQSKWLLDCPEPPSPW-HELKRQVKGSLTKAKKFKSLQKQPFK  
QILSVLQAIPIFGWCRNYKLT--MFKNDLMAGLTLASLCIPQSIGYATLA---KLDQYGLYTSVPPLIYALMGTSREIAIGPV  
AVVSLISSMLQKLIDPETDPL-----GYKKLVLTFFAGIFQASFGFLRGLVDFL  
SHAAIVGFMGGAAIVIGLQQLKGLGITN-----FTNTDIVSVLRAVWRSCQ-----QQWSPHTFILGCSFLSFILITRFIGKKY  
KK-----LFWLPAIAPLIAVVVSTLMVFLTK-----ADEHGVKTVRHIKG-GLNPMSIQDLDFNT-----PH  
LGQIAKIGLIIAIVALTEAIAVGRSFAFI-KGYRLDGNKEMVAIGFMNVLSFTSCYAATGSFSRTAVNFA-AGCETAMSNIV  
MAVTVFALECLTRLLYTPAILASIALPGLIN---INEAIIHWKVDKFDLALIGAFFGVLFAS-VEIGLLVAVVISFAKIIISIR  
PGIETLGRMPGTDFTDTNQY-----PMTVKTPGVLI  
VKSALLCFANASSIEERIMGWVDEE-----EEEENTKSNARKK-ILFV  
VLDMSSLIN--VDTSGITALLELHNKLIK---GVELVIVNP-KWQVIHKLNQAKFV-DRIGG--KVYLTIGEALDACFGLKV-----

-----</s

eq-data>

</sequence>

<sequence seq-type="Protein">

<seq-name>SUT3\_STYHA</seq-name>

<seq-info><length>1354</length></seq-info>

<seq-data>-----  
-----MSSLGTEQFSERSQWVLNSPNPPPLTKKFLGPKDNKFFTSSSSK-----KETRAVSFLASLFPILSWIRTYSAT--KF  
KDDLSSGLTLASLSIPQSIGYANLA---KLDQYGLYTSVIPPVIYALMGSSREIAIGPVAVVSMSSLVKVIDPDAHNP-----  
-----DYRNLVFTVTLFAGIFQAFGVRLRGLVDFLSHAALVGMAGAAIVIGLQQLKG  
LLGLTH-----FTTKTDAVAVLKSVYTSLHQQTSSSENWSPLNFVIGCSFLIFLLAARFIGRRNKK-----FFWLPAI  
APLLSVILSTLIVFLSK-----GDKHGVNIIKHVQG-GLNPSSVHKLQNG-----PHVGQAAKIGLISAIIALTEAIAVGR  
SFANI-KGYHLDGNKEMLAMGCMNIAGSLTSCYVSTGSFSRTAVNFS-AGCKTAVSNIVMAVTVLLCLELFTRLLYTPMAIL  
ASIILSALPGLID---IGEAYHIWKVDKFDLACLGAFFGVLFVS-IEIGLLIALSISFAKILLQAIRPGVEVLGRIPTTEAYCDVAQY--  
-----PMAVTTPGILVIRISSGSLCFANAGFVRERILKWVE  
D-----EEQDNIEEAAKGR-VQAIIDMTDLTN--VDTSGILALEELH  
KKLSR---GVELAMVNP-RWEVIHKLKVANFV-DKIGKE-RVFLTVAEAVDACLSSRFANSA-----

-----</seq-data>

</sequence>

<sequence seq-type="Protein">

<seq-name>O64434</seq-name>  
<seq-info><length>1354</length></seq-info>  
<seq-data>-----  
--MGIELQNHQSHHEEASPAEEPMSRWLINTPEPPSMWQELIGYIR-TNVLAKKKHKRNKTKNSSSNLVYSCLKSAFPILSW  
GRQYKLN--LFKKDLMAGLTLASLCIPQSIGYANLA---GLDPEYGLYTSVVPPLIYSTMGTSRELAIGPVAVVSLSSMVRDL  
QDPVTDPI-----AYRKIVFTVTFAGAFQAIFGLFRLGFLVDFLSHAALVGF MAG  
AAIVIGLQQLKGLFGLTH-----FTNKTDVVSVLSSVFHSLH-----HPWQPLNFVIGSSFLIFILLARFIGKRNNK-----  
----LFWIPAMAPLISVVLATLIVYLSN-----AESRGVKIVKHIP-GFNQLSVNQLQFKS-----PHLGQIAKIGLISAIIA  
LTEAIAVGRSFATI-KGYRLDGNKEMMAMGMNIAGSLSSCYVATGSFSRTAVNFS-AGCETVVSNIVMAITVMISLEVLTR  
FLYFTPTAILASIIALSALPGLID---VSGALHIWKLDKLDLFLVIAAFFGVLFAS-VEIGLLLAVGISFARIMLSSIRPSIEALGRLSKTD  
IFGDINQY-----PMANKTAGLLTLRISSPLLCFANANFIR  
DRILNSVQEI-----EGEENEQEVLENGLQVVILDMSCMMG--VD  
TSGVFALEELHQELASN----DIRLVIASP-RWRVLHKLKRAKLD-EKIKTE-NIYMTVGEAVDIYVRARSTSHELC-----  
-----</seq-data>  
</sequence>

<sequence seq-type="Protein">  
<seq-name>Q43482</seq-name>  
<seq-info><length>1354</length></seq-info>  
<seq-data>-----MPRT  
VSDGGEDFDGDVCSQTASQRHTD--STHHHHGYKVGFPFAKGVFAEFAEGVKETFFADDPLR-EYKDQPRSKKLWLSLVHL  
FPVLDWSRSYTFG--KFKGDLVAGLTIASLCIPQDIGYAKLA---NLQPHVGLYSSFPPLIYALMGSSRDIAIGPVAVVSLLLGTL  
LQEEIDPVKNPL-----EYSRLAFTATFFAGITQAMLGFFRLGFIIIEFLSHAAIVGFM  
AGAAITIALQQLKGLLGIK-----FTKKS DIISVMESVWGNVQ-----HGWNWQTILIGSSFLAFLTTKYIAKKNKK-----  
-----LFWVSAIAPLISVVISTFCVYITR-----ADKQGVAVIKNIQ-GINPPSFDLIYWSG-----PYLAKGFRIGVV  
SGMVALTEAIAIGRTFAAM-KDYQIDGNKEMVALGTMNIVGSM TSCYVATGSFSRS AVNYM-AGCKTAVSNVVM AIVV  
MLTLLLITPLFKYTPNAILASIIINAVVNLVD---YETAYLIWKVDKMD FVALLGAFFGVVFAS-VEYGLLIAVAISLGKILLQVTRP  
RTALLGNLPRTTIYRNVEQY-----PEATKVPGMIVRV  
DSA-IYFTNSNYVKERILRWLR-----DEEEQQQEQLSK-TEFLIV  
ELSPVTD--IDTSGIHALEELLKALEKR----KIQLILANP-GPAVIQKLRSAKFT-DLIGDD-KIFLSVGD VAVKKFAPKSSLNV-----  
-----</seq  
-data>

</sequence>  
<sequence seq-type="Protein">  
<seq-name>Q9XGB5</seq-name>  
<seq-info><length>1354</length></seq-info>  
<seq-data>-----MPRT  
VSDGGEDFDGDVSSQTGSHRHTDSNSTHHHHGYKVGFPARGLF AEFADGVKETFFADDPLR-EYKDQSRSKKLWLSLVHL  
LFPVLDWARSYKFS--MFKGDFIAGLTIASLCIPQDIGYAKLA---FLPAHVGLYSSFPPLVYAMMGSSRDIAIGPVAVVSLLL  
GTLLEEEIDPVKSPY-----EYSRLAFTATFFAGITQAMLGFFRLGFIIIEFLSHAAIIG  
FMAGAAVTIALQQLKGLGIK-----FTKKS DIISVMESVWGNVH-----HGWNWQTILIGASFLAFLTTKYIAKKNKK-----

-----LFWVSAIAPLISVVISTFCVYITR-----ADKQGVAVKDIKQ-GINPPSFHLIYWSG-----PYLAKGFRIG  
VVAGMVALTEAIAIGRTFAAM-KDYQIDGNKEMVALGTMNIVGSMTSCYVATGSFSAVNYM-AGCKTAVSNVMAIV  
VMLTLLITPLFKYTPNAILASIIINAVVSLVD---YETAYLIWKVDKMDFVALLGAFFGVVFAS-VEYGLLIAVAISLGKILLQVTR  
PRTALLGNLPRTTIYRNEQY-----PEAAKVPGVMIVR  
VDSA-IYFTNSNYVKERILRWLR-----DEEDQQQEQLSK-TEFLI  
VELSPVTD--IDTSGIHALEELLKALEKR---KIQILANP-GPAVIQKLRSKFT-ELIGDD-KIFLSVGDVAVKFKFAPKSALNV-----

</se

q-data>

</sequence>

<sequence seq-type="Protein">

<seq-name>Q9XGB6</seq-name>

<seq-info><length>1354</length></seq-info>

<seq-data>-----MSRT  
MSDGSEDFNGNISR-TGSHRQ-----TDHHGYKVRFPKGLFTELAEGVKETFFANDPLR-EYKDQPRSKLWLSLAHLFPV  
LDCPTSITFG--MFKGDFVAGLTIASLCIPQDIGYAKLA---FLPAHVGLYSSFPPLIYAAMGTSRDIAIGPAAVLSLLGTLLE  
EIDPVKNPY-----EYSRLAFTATFFAGVTQAMLGFFRLGFIIEFLSHAAIVGFMAG  
AAITIGLQQLKGLGIAK-----FTKSDIISVMESVWGNVH-----HGCNWQTILIGASFLAFLTTKYIAKKNK-----  
-----LFWVSAIAPLISVIISTFCVFITR-----ADKQGVAVS-----INPPSFHLIYWTG-----PYLVKGFRIQVAGMVG  
LT-AIAIGRTFAAL-KDYQIDGNKEMVALGTMNIVGSMTSCYVGTGSMSRSVAVNYM-AGCKTAVSNVMAIVVMLTLLVT  
PLFKYTPNAILASIIINAVVSLVD---YETAYLIWKVDKMDFMALLGAFFGVVFAS-VEYGLLIAVAISLGKILLQVTRPRTALLGN  
LPRTTIYTNVEQY-----PEATKVPGVMIVRVDSA-IYFTN  
SNYVKERILRWLR-----DEEEQQQEQLSK-TEFLVELSPVTD--I  
DTSGIHALEELLKALEKR---KIHLILANP-GPAVIQKLRSKFT-ELIGDD-KIFLSVDDAVKFKFAPKSALNV-----

</seq-data>

</sequence>

<sequence seq-type="Protein">

<seq-name>SUT2\_STYHA</seq-name>

<seq-info><length>1354</length></seq-info>

<seq-data>-----MSQRVSD  
QAMAEVIAETRTNSSRRHGGG---DDTPSLPYMHKVGAPPKQTLFQEIKHSFNETFFDPKDFG-NFKDQSGSRKFLVGLQY  
IFPILEWGRHYDLK--KFRGDFIAGLTIASLCIPQDLAYAKLA---NLDPWYGLYSSFVAPLVYAFMGTSRDIAIGPVAVVSLLLG  
TLLSNEISNTKSH-----DYLRLAFTATFFAGVTQMLLGVCRGLFLIDFLSHAAIVG  
FMAGAAITIGLQQLKGLLGIKD-----FTKNSDIVSVMHSVWSNVH-----HGWNWETILIGLSFLIFLITKYIAKKNK-----  
-----LFWVSAISPMICVIVSTFFVYITR-----ADKRGVTIVKHIKS-GVNPSSANEIFFHG-----KYLGAQVVRV  
VVAGLVALTEAMAIGRTFAAM-KDYSIDGNKEMVAMGTMNIVGSLTSCYVTTGSFSAVNYM-AGCKTAVSNIVMAIV  
VLLTLLVITPLFKYTPNAVLAASIIIAAVVNLVN---IEAMVLLWKIDKDFVACMGAFVIFKS-VEIGLLIAVAISFAKILLQVTR  
PRTAVLGKLPGTSVYRNIQY-----PKAEQIPGMLIIRV  
DSA-IYFSNSNYIKERILRWLI-----DEGAQRTESELPE-IQHLLIVE  
MSPVTD--IDTSGIHAFEELYKTLQKR---EVQLMLANP-GPVVIEKLHASNLA-ELIGED-KIFLTVADAVATYGPKTAAF-----

```
-----</se
q-data>
</sequence>
<sequence seq-type="Protein">
<seq-name>SUT1_STYHA</seq-name>
<seq-info><length>1354</length></seq-info>
<seq-data>-----MSQRVSD
QVMADVIAETRSNSSSHRHGGGGGDDTTSLPYMHKVGTPPKQTLFQEIKHSFNETFFPDKPGF-KFKDQSGFRKLELGL
QYIFPILEWGRHYDLK--KFRGDFIAGLTIASLCIPQDLAYAKLA---NLDPWYGLYSSFVAPLVYAFMGTSRDIAIGPVAVVSL
LGTLLSNEISNTKSH-----DYLRLAFTATFFAGVTQMLLGVCRLGFLIDFLSHA
AIVGFMAGAAITIGLQQLKGLLGISNNN-----FTKKTDIISVMRSVWTHVH-----HGWNWETILIGLSFLIFLLITKYIAKKNK
-----LFWVSAISPMISVIVSTFFVYITR-----ADKRGVSIVKHIKS-GVNPSSANEIFFHG-----KYLGAGVR
VGVVAGLVALTEAIAIGRTFAAM-KDYALDGNKEMVAMGMTMNIVGSLSSCYVTTGFSRSR SAVNYM-AGCKTAVSNIVMSI
VLLTLLVITPLFKYTPNAVLASIIIAAVVNLVN---IEAMVLLWKIDKDFVACMGAFFGVIFKS-VEIGLLIAVAISFAKILLQVT
RPRTAVLGKLPGTSVYRNIQQY-----PKAAQIPGMLIIR
VDSA-IYFSNSNYIKERILRWLI-----DEGAQRTESELPE-IQHLITE
MSPVPD--IDTSGIHAFEELYKTLQKR---EVQLILANP-GPVVIEKLHASKLT-ELIGED-KIFLTVADAVATYGPKTAAF-----
-----</seq
-data>
</sequence>
<sequence seq-type="Protein">
<seq-name>O22277</seq-name>
<seq-info><length>1354</length></seq-info>
<seq-data>-----
---MSGTINPPDGGGSGA--RNPPVVRQVRLAPPKAGLLKDIKSVEETFFHDAPLR-DFKQTPAKKALLGIQAVFPIIGWAR
EYTLR--KFRGDLIAGLTIASLCIPQDIGYAKLA---NVDPKYGLYSSFVPLIYAGMGSSRDIAIGPVAVVSLLVGTLTLCQAVIDPK
KNPE-----DYLRLVFTATFFAGIFQAGLGLRGLIDFLSHA AVVGMGGAAITI
ALQQLKGFGLIKT-----FTKKTDIVSVMHSVFKNAE-----HGWNWQ TIVIGASFLTLLVTKFIGKRNK-----
LFWVPAIAPLISVIISTFFVFIFR-----ADKQGVQIVKHIDQ-GINPISVHKIFFSG-----KYFTEGIRIGGIAGMVALTE
AVAIARTFAAM-KDYQIDGNKEMIALGTMNVVGSMTSCYIATGFSRSR SAVNFM-AGVETAVSNIVMAI VVALTLEFITPLFK
YTPNAILAAIIISAVLGLID---IDAAILIWRIDKLDLACMGAF LGVIFIS-VEIGLLIAVVISFAKILLQVTRPRTTVLGKLPNSNVY
RNTLQY-----PDAAQIPGILIRVDSA-IYFSNSNYVRERA
SRWVR-----EEQENAEKEYGMPA-IRFVVIEMSPVTD--IDTSGIHS
IEELLKSLEKQ---EIQLILANP-GPVVIEKLYASKFV-EEIGE K-NIFLTVGDAVAVCSTEVAEQQT-----
-----</seq-data>
</sequence>
<sequence seq-type="Protein">
<seq-name>O49307</seq-name>
<seq-info><length>1354</length></seq-info>
<seq-data>-----
```



-----MEVHKVVAPPHKSTVAKLTKLKETFFPDDPLR-QFRGQPNRTKLIRAAQYIFPILQWCPEYSFS--LLK  
SDVVSGLTIASLAIPQGISYAKLA---NLPPIVGLYSSFPPLVYAVLGSSRD LAVGPVSIASLILGSMRQQVSPVDDPV-----  
-----LFLQLAFSSTFFAGLFQASLGILRLGFIIDFLSKATLIGFMGGAAIIVSLQQLKGLLGIT  
H-----FTKHMSVVPVLSSVFQHT-----NEWSWQTIVMGVCFLFLLSTRHLSMKKPK-----LFWVSAGAPL  
LSVIVSTLLVFVFR-----AERHGISVIGKLEPE-GLNPPSWNMLQFHG-----SHLALVAKTGLVTGIVSLTEGIAVGRTF  
AAL-KNYHVDGNKEMIAIGLMNVVGSATSCYVTTGAFSRSVAVNNN-AGAKTAVSNIVMSVTVMVTLFLMPLFEYTPNVV  
LGAIIVTAVIGLID---LPAACHIWKIDKFDLVMCAFFGVIFLS-VQNGLAIAVGLSLFKILMQVTRPKMVIMGNIPGTDIYRD  
LHHY-----KEAQRIPGFLVLSIESP-VNFANSNYLTERTS  
RWIE-----ECEEEEAQEKHSS-LQFILEMSAVSG--VDTNGVSFF  
KELKKTAKK---DIELVFNVP-LSEVVEKLQRADEQKEFMRPE-FLFLTVAEAVASLSLKGPSLSNV-----

</seq-data>

</sequence>

<sequence seq-type="Protein">

<seq-name>O04001</seq-name>

<seq-info><length>1354</length></seq-info>

<seq-data>-----MVG  
MRVPYGGSYTNNGSNESQPPGAPEVPAMVEVHKVPPPPQSTASKLTKRLKETLFPDDPFR-GFQGQPARVQWVLAV  
KYLPILDWLPAYSLS--LFKSDLIAGLTIASLAIPQGISYAKLA---NLPLLIGLYSSFPPLVYAVLGSSRD LAVGPVSISSLIMGPC  
CASRQPHCGAD-----AVPAARLHATLFAFIFQASLGILRLGFIIDFLSKATLVGF  
MAGAAIIVSLQQLKALLGIVH-----FTTEMGIVPVMASVFHHT-----KEWSWQTILMGVCFLVLLVARHVSIRWPR----  
-----LFWVSACAPLVSVIISTLVVFLK-----AQNHGISIIGQLKC-GLNRPSWDKTNIDT-----TYLGLTMK  
TGLVTGIISLTEGIAVGRTFASL-KEYQIDGNKEMMAIGLMNVVGSCTSCYVTTGAFSRSVAVNNN-AGCKTAMSNVIMALT  
VMVTLFLMPLFVYTPNVV LGAIIVTAVIGLID---IPAVYHIWKMDKMDFLVCVCAFAGVLFIS-VQEGLAIAVGISVFRVLLQI  
TRPKITVQGNIMGTDIYRNLHQQ-----KDAQRIPGFLIL  
ATEAP-INFANSNYLNERIKRWIE-----EESSAQTKQTE---LRFVIL  
DLSAVPA--IDTSGVAFLIDIKKSIEKR---GLELVLVNP-TGEGHGKNTASERGTQAFQVGIACILTTGEAVASLSALAKMASP-

<

/seq-data>

</sequence>

<sequence seq-type="Protein">

<seq-name>O23250</seq-name>

<seq-info><length>1354</length></seq-info>

<seq-data>-----  
-----MGTEDYTFPQGAEEHLRRHHTVEAPQPQPFLLKSLQYSVKETLFPDDPFR-QFKNQNASRKFVLGLKYFLPIFEWAPR  
YNLK--FFKSDLIAGITIASLAIPQGISYAKLA---NLPPILGLYSSFPPLVYAVLGSSRD LAVGTAVASLLTGAMLSKEVDAEKD  
PK-----LYLHLAFTATFFAGVLEASLGIFRLGFIVDFLSHATIVGFMGGAATVVSL  
QQLKGIFGLKH-----FTDSTDVISVMRSVFSQT-----HEWRWESGVLGCGFLFFLLSTRYFSIKKPK-----FF  
WVAAMAPLTSVILGSLLVYFTH-----AERHGQVIGDLKK-GLNPLSGSDLIFTS-----PYMSTAVKTGLITGIIALAE  
GIAVGRSFAMF-KNYNIDGNKEMIAFGMMNIVGSFTSCYLTTGPF SRSVAVNNN-AGCKTAMSNIVMAIAVMFTLLFLTPLF  
HYTPLVLSAIIISAMLGLID---YQAAIHLWKVDKFDLVCMSAYVGVVFGS-VEIGLVVAVAIARIALLFVSRPKTAVKGNIP

NSMIYRNTEQY-----PSSRTVPGILILEIDAP-IYFANASY  
LRERIIRWID-----EEEERVKQSGESS-LQYIILDMSAVGN--IDTS  
GISMMVEIKKVIDRR---ALKLVLSNP-KGEVVKKLTRSKFIGDHLGKE-WMFLTVGEAVEACSYMLHTFKTEPASKNEPWN  
NV-----

</seq-

data>

</sequence>

<sequence seq-type="Protein">

<seq-name>O04289</seq-name>

<seq-info><length>1354</length></seq-info>

<seq-data>

-----MSSKRASQYHQVEIPPPQPFLKSLKNTLNEILFADDPFRRIRNESKTSKKIELGLRHVFPILEWARGYSLE--YL  
KSDVISGITIASLAIPQGISYAQLA---NLPPILGLYSSLVPPLVYAIMGSSRD LAVGTVAVASLLTAAMLGKEVNAVVPK-----  
-----LYLHLAFTATFFAGLMQTCLGRLRGFVVEILSHAAIVGFMGGAATVVCLQQLK  
GLLGLHH-----FTHSTDIVTVLRSIFSQS-----HMWRWESGVLGCCFLIFLLTTYISKRPK-----LFWISAM  
SPLVSVIFGTIFLYFLH-----DQFHGIQFIGELKK-GINPPSITHLVFTP-----PYVMLALKVGIITGVIALAEGIAVGRSF  
AMY-KNYNIDGNKEMIAFGMMNILGSFSSCYLTTGPFSSAVNYN-AGCKTALSNNVMAVAVAVTLLFLTPLFFYTPLVLS  
SIIIAAMLGLVD---YEAAILHWKLDKDFDFVCLSAYLGVVFGT-IEIGLILSVGISVMRLVLFVGRPKIYVMGNIQNSEIYRNIEH  
Y-----PQAITRSSLLILHIDGP-IYFANSTYLDRIGRWID-  
-----EEDKLRITSGDIS-LQYIVLDMSAVGN--IDTSGISMLEELNKI  
LGRR---ELKLVIANP-GAEVMKKLSKSTFI-ESIGKE-RIYLTVAEAVAACDFMLHTAKPD--SPVPEFNNV-----

</seq-data>

</sequence>

<sequence seq-type="Protein">

<seq-name>O67306</seq-name>

<seq-info><length>1354</length></seq-info>

<seq-data>

-----MKRAEEVPGITVSFSIKFPFLMWFKNYSKE--GFIRDLIAGITVAADVYP  
QSMAYAMLA---GMPPIHGLYVAFIATIVAAIFGSSRYLNTGPVAMTCLLSASVLYGIGFEPQTP-----  
-----EWIKYMALLALMVGLIRLTVGLFKLGFIVDLISNSVVGFTAAGALVIALSQFKHFFGYEV-----KSST  
HIFEVMDLVSKI-----EMTNPYTLAIGVLAYFLIWGSRRI-----SVYLPGALIAVVVTSLLVYWYK-----  
---LYDKGVAIVGEVPQ-GLPSPEPPPLD-----FAMMSKMWGGAFVVAFFGLIEAVAIKTLAIR-VGDKWDPNQEL  
IGQGLANVAVSFFKGFAPAGGSFSRSSLNFA-LGAVSPLASVISGALVGLTLFLFAPAFYLPKATLAAIVLSAVVNLIRP---QDIL  
KLYRINKIDGVVAGLTFLSVFFMD-LWVAITLGVLLSLGSFVYKTMYPRIVTLTRDPVTRTFVNAEK-----  
-----RGLPECPQIMFIRPNMS-IYFGNAQYVYDYIMNKVE-----  
-----DALFNGRP-LKFVLIDMEAVNY--VDATGAETIVRLVKDIKQK---GVEVAFA  
NI-GCDVYPILENAGFD-EVVNQD-LVFNAKGEAIGLFEKLDHDYCREKCPYAVFDECLEVKPPEKVQELKKAS-----

</seq-data>

</sequence>

<sequence seq-type="Protein">

```
<seq-name>Q9U6Q2</seq-name>
<seq-info><length>1354</length></seq-info>
<seq-data>-----
-----MGAATAWDPRDQGVYTHCSGKKVKPTVSTLDCTRSWLQDCQRRTFNRKTLHKRILPWLPKYNS
Q--DAVGDVLVAGITVGLTVIPQALAYAGIA---GLPVAYGLYASFVGCIFYIFLGSKDVPMPGSAIVALLTYQAAQ-----
-----GSWQKSVLLCLLSGIVELLMGLFGLGFLIDFVSGPVSSGFTSAVSLIILTSQIQS
VLGITA-----KGNT-FVEIWTQVFHNI-----EHTRAGDTVLGLTCIVILLMRSLSSCRIGPVDEKE----CSSFQRAVNKILWI
VGTARNAILVVVCCIMGYMLHT-----EEHGAPFRVVG EIPP-GLPSIQLPPTS LTANETSNGVAEGFVEMVHSMGSGLV
VIPLISLMENIAICKAFA---NGKPV D ASQELIAIGTANIFNSFVQXFPGTGALS R GAVNNA-SGVRTPLSNIYSGGLVMTALLF
LTPYFYFIPRPTLAAIIISAVVFMIEV---KVVKPMWRSKKS DLVPGVGT FVACL VLP-LEW GILIGVGLNVIFILYHAARP KLTTE
LLTT-----QSGVEYLMIT-PDRCLIFPSVD
YVRNLVN-----KQSIRQ-NVPVVIDASHVYG--ADFTTATV
IDSLISDFNQR---GQLLFFYNL-KPSICSIFEHVSAA-QFVV---YYQEQLDELLKERNYVQKRLETA-----
-----</seq-data>
</sequence>
```

```
<sequence seq-type="Protein">
<seq-name>Q9URY8</seq-name>
<seq-info><length>1354</length></seq-info>
<seq-data>-----MRAWGWVRNKFSSD
DYNDGASNKDYPDRFNEFDNSQNDHNDYTQNN AQFQNAQT TTFGR TISR VKAYYEIPEDDELDELASIPQWFKNVTSNI
FKNFLHYLKS LFP IIEWLPNYNPY--WLINDLIAGITVGCVVVPQGM SYAKVA---TLPSEYGLYSSFVGVAIYCF FATS KDVSIG
PVAVMSLITAKVIANVMAKDETY-----TAPQIATCLALLAGAITCGIGLLRLGFII
EFIPVPAVAGFTTGSALNILSGQVPALMGYKKN-----VTAKATYMVIIQSLKHL-----PDTTVDAAFGLVSLFILFFTKYMC
QYLGKRYPRW-----QQAFFLTNLRSAVVVIVGTAISYAICKH-----HRSDPPISIIKT VPR-GFQHVGVPLIT-----
---KKLCRDLASELPVSVIVLLEHISIAKSFGRV-NDYRIVPDQELIAMGVTNLIGIFFNAYPATGFSR SAIKAK-AGVKTP IAGI
FTA AVVILSLYCLTDAFYIPNAILS AVIIHAVTDLILP--MKQTILFWRLQPLEACIFFISVIVSVFSS- IENGIYVSVCLAAALLLRI
AKPHGSFLGKIQAANKY-GSDNIANV-----RDIYVPLEMKEENPNLEIQS
PPPGVFIFRLQES-FTYPNASRVSTMISRRIKDLTRRGIDNIYVKDIDRPWNVPRQRKKKEN-----
-----SEIEDLRPLLQAIIFDFSAVNN--LDTTAVQSLIDIRKELEIYA-NETVEFHFTNIRSGWIKRTLVAAGFGK--PKGHAVD
ASVCVEVAAPLRDANLSAESSRNL SRIITPI--YDDEEGNVSGHIYE-----LDGKNNSDLSMHCQKGSNQVEIEFVEF
NSRKYPFFHVDVASAVVDLQHRLLSPQKSDSFGSLKEGGTTTIKKIEN-----
-----</seq-data>
```

```
</sequence>
<sequence seq-type="Protein">
<seq-name>SULH_SCHPO</seq-name>
<seq-info><length>1354</length></seq-info>
<seq-data>-----MSFIKKIKHYFADPADLPQDEAPDS
VPGLVPPPSNFVPVYPEPTYSDTVSKKGTIVRVVRHTASKLTKHGDSSQSLSTLPNNDISVGEYVEPLSPVPGWLKQNI FSHF
GTRLLHYLRSLFPIMNWLPRYNWN--WLVYDFIAGITVGCVVVPQGM SYAKVA---TLPAQYGLYSSFVGVAIYCF FATS KDV
SIGPVAVMSLVTSKVIANVQAKDPNY-----DAAQIGTTLALLAGAITCGLGLLRL
GFII EFIPVPAVAGFTTGSALNIMAGQVSSLMGYKSR-----VHTNAATYRVIIQTLQNL-----PHTKVDAAFGLVSLFILYLV
```

RYTCQHLIKRYTKF-----QRVFFLTNVLRSVAVIIIVGTAISYGVCKH-----RRENPPISILGTVPS-GFRDMGVPVIS-----  
-----RKLCADLASELPVSVIVLLLEHISIAKSFGRV-NDYKVIPDQELIAMGATNLIGVFFHAYPATGSFSRSAINAK-SGVRTP  
LGGIFTAGVVVLALYCLTGAFYYIPNAVLSAVIIHSVFDLIIP--WRQTLLFWRMQPLEALIFCAVFSVSS-IENGIYAVCLS  
AALLFRIAKPSGSFLGILKIANKFDDENSIDVV-----RDIYVPLNQKGM  
NPNLTVRDPPAGVLIFRLQES-FTYPNAGHVNSMLTSKAKTVTRRGNANIYKKASDRPWNDPAPRKKKNA-----  
-----PEVEDTRPLLRAIILDFSAVNH--IDTTGVQALVDTRKELEIYA-GDEVEFHFTDINNDWIKRTLVA  
GFGKARDATKYTSRSIEVGSAAPLRDIE-TPMAPGN-SRIVMPSSVRVRFDEEEAIESSIPAIVSEDGADSDTISVSDDKDKK  
VEGHRPSQDPTFSHHEYYPVISTTYPFFHVDVTSAVVDIQYRHVLDVNYKPKIVTNEVENENIEHSDGAA-----  
-----

</seq-data>

</sequence>

<sequence seq-type="Protein">

<seq-name>CY14\_NEUCR</seq-name>

<seq-info><length>1354</length></seq-info>

<seq-data>-----

-----MASTSTGETVKKFLGIPADERLNDTACYVDGSFVESEPTTQDFLNEIRPTVQGTNLNRELFPFVNWIFHYNLT  
--WLLGDFIAGVTVGFVVVPQGMAYAKLA---NLAPEYGLYTSFVGFVLYWAFATSKDITIGAVAVMSTIVGNIIANVQKDHP  
DF-----DAGDIARTLAFISGAMLLFLGLIRFGFIVEFIPIVAISAFMTGSAISIAAG  
QVSTLMGIPN-----INSREETYKVIINTLKGL-----PNTHLDAH-GLDRAIWAVLYPLVLYQMKGKRYPRQ-----QRA  
WFFVSTLRMVFIILYILVSWLVNRHV-----KDPKKAHFILGHVPS-GFQHKGAPRLD-----NEILSAISGDIPTTILVL  
LIEHIAISKSFGRV-NNYIINPSQELVAIGFTNLLGPFLGALPRYRIILENGHQGQ-SRCSHASRWHLRPRPARSLCAHLRLL  
HPQQRSRRHDHPRRRPDHSS---KGVYKFWLTSPLEVVIFAGVFSIFTS-IENGIYVVAASGAVLLWRIAKSPGKFLGQTEI  
YTAPRELVRGSKDSGRSRKACCRSRST-----TAFSLDRDDLSNPELQISTPWPGIFVY  
RFGEG-LNYVNSAKHLDNLTIHVFKHTRTELNKFELGDRPWNDPGPRRPSLPNR-----  
-RARFAPDPAAHHPRLRRQLHR--CDRRP-RRQLDLRNQFDRYAHPDKVEWHFAGVSNRWTKRALVASGFGV----DSLRT  
AKVQRENHKGQVQEVQDQGPLVAIGPSVSASDIEAVVRSVSGSTDEKRPEGEGGATNGGMEKGSANGEDISTVPTATSAD  
ACACGKGRWREEVGAGVWD-----

</seq-data>

</sequence>

<sequence seq-type="Protein">

<seq-name>SUL1\_YEAST</seq-name>

<seq-info><length>1354</length></seq-info>

<seq-data>-----

-----MSRKSSTEYVHNQEDADIEV  
FESEYRTRYRESEAAENRDGLHNG-----DEENWKNVSSKQKFGVTKNELSDVLYDSIPAYEESTVTLKEYYDHSIKNNLTAKSA  
GSYLVSLFPIIKWFPHYNFT--WGYADLVAGITVGCVLVPQSMSYAQIA---SLSPEGLYSSFIGAFIYSLFATSKDVCIGPVA  
MSLQTAKVIAEVLKKYPEDQTEV-----TAPIIATTLLCGIVATGLGILRLGFLVELIS  
LNAVAGFMTGSAFNIIWGQIPALMGYNL-----VNTREATYKVVINTLKHL-----PNTKLDVAVGLIPLVILYVWKWWC  
TFGITLADRYRNQPKVANRLKSFYFQAQAMRNAVVIVVFTAISWSITRN-----KSSKDRPISILGTVPS-GLNEVGVMKIP--  
-----DGLLSNMSSIEPASIIVLVLEHIAISKSFGRV-NDYKVVDPQELIAIGVTNLIGTFFHSYPATGSFSRSALKAK-CNVRT  
PFGVFTGGCVLLALYCLTDAFFIPKATLSAVIIHAVSDLLTS--YKTTWTFWKTNPLDCISFIVTVFITVSS-IENGIYFAMCW  
SCAMLLLKQAFAPAGKFLGRVEVAEVLNPTVQEDIDAVISSNELPNEL-----NKQVKSTVEVLPAPPEYKF  
SVKWVVPFDHGYSRELNINTTVRPPPPGVIVYRLGDS-FTYVNCNRHYDIIIFDRIKEETRRGQLITLRKKS DRPWNDPGEWK

PDSLKSLFKFRHSATTNSDLPISNGSS-----NGETYEKPLLKVVCLDFSQVAQ--VDSTAVQSLVDLRKAVNRY  
A-DRQVEFHFIISPWIKRSLLSVKFGT--TNEEYSDDSIIAGHSSFHVAKVLKDDVDYDDEDSRIST-----  
-----SYSNYETLCAATGTNLPFFHIDIPDFSKWDV-----  
-----</seq-data>

</sequence>

<sequence seq-type="Protein">

<seq-name>SUL2\_YEAST</seq-name>

<seq-info><length>1354</length></seq-info>

<seq-data>-----MSREGYPNFEEVEIPDFQETNNTV  
LDDLELEYDQYKNNENNDTFNDKDLESNSVAKHNAVNSSKGVKGSKIDYFNPSDVSLYDNSVSQFEETTVSLKEYYDHSIRS  
HLTVKGACSYLKSVPFIINWLPHYNFS--WFTADLIAGITIGCVLVPQSMSYAQVA---TLPAQYGLYSSFIGAYSYSFFATSKDV  
CIGPVAVMSLQTAKVIADVTAKYPDGDSAI-----TGPVIATTLALLCGIISAAVGFRL  
LGFLVELISLNAVAGFMTGSANILWGQVPALMGYNL-----VNTRAATYKVIETLKHL-----PDTKLDVAVGLIPLFLLY  
VWKWVCGTYGPRINDRYNSKNPRLHKIKWTFYFAQASRNGIIIVFTCIGWAITRG-----KSKSERPISILGSVPS-GLKEV  
GVFHVP-----PGLMSKLGPNLPASIIVLLLEHIAISKSFGRI-NDYKVVDPQELIAGVSNLLGTTFFNAYPATGSFSRSALK  
AK-CNVRTPLSGLFSGSCVLLALYCLTGAFYIPKATLSAVIIHAVSDLLAS--YQTTWNFWKMNPLDFICFIVTVLITVFAS-IED  
GIYFAMCWSCAMLILKVAFPAGKFLGRVEVAEVTDAYVRPDSVVSYSVSENNNGISTLEDGGEDDKESSTKYVTNSSKKIET  
NVQTKGFDPSSSISQPRIKYHTKWIPFDHKYRELNPVQILPPPQVGLVYRLSES-YTYLNCSRHYNIITEEVKKVTRRGQLI  
RHRKSDRPWNDPGPWEAPAFKLNKFWKKRENDPESMENAPSTSV-----DVERDDRPLLKILCLDFSQVA  
Q--TDATALQSLVDLRKAINQYA-DRQVEFHFIISPWVVKRGLISRGFGT--LNEEYSDSIVAGHTSYHVARVPQGEENPEK  
Y-----SVYASGTNLPFFHIDIPDFAKWDI-----  
-----

-----</seq-data>

</sequence>

<sequence seq-type="Protein">

<seq-name>DTD\_MOUSE</seq-name>

<seq-info><length>1354</length></seq-info>

<seq-data>-----MSENKEQ  
HDLSPRDLPEEAFGFPSELPLETQRRSGTDLRQSETGHGRRFRRIHMELEKPDIDIKQFVIRELQKSCQCSAAKVRDGF  
DFFPVLRLWLPKYDLK-KNILGDVMSGLIVGILLVPQSIAYSLA---GQEPIYGLYTSFFASIIYFLGTSRHISVGFILCLMIGE  
VDRELHKACPDATSSSIAVSSGCVVNHTLDGL--CDKSC-----YAIKIGSTVTFMAGVYQVAMGFFQV  
GFVSVYLSDALLSGFVTGASFTILTSQAKYLLGLSLP-----RSHGVGVSITTWIHFIRNI-----RNTNICDLITSL  
LCLLVLPKEL  
NEHFKDK-----LKAPIVELIVVVAATLASHFGK-----LNGNYNSSIAGHIPT-GFMPPKAPDW-----  
--SLIPNVAVDIAISIIGFAITVSLSEMFACK-HGYTVKANQEMYAIGFCNIIPFFHCITTSAAKTLVKES-TGCQTQLSAIV  
ALVLLLVLVIAPLFYSLQKCVLGVITIVNLRGALLK--FRDLPKMWRLSRMDTVIWFVTMLSSALLS-TEIGLLVGVCFMFCVI  
LRTQPKNSLLGLEEESETFESISTY-----KNLRSKSGIKV  
FRFIAP-LYYINKECFKSALYKALNPVLVKA AWKKAARKLKEEMVTFRG-----DPDEVS  
MQLSHDPLEVHTIVIDCSAIQF--LDTAGIHTLKEVRRDYEA V---GIQVLLAQC-NPSVRDSLARGEYC-KKEEET-LLFYS  
LSEA  
VAFAEDSQNQKGVVNGLSLSDG-----  
-----

-----</seq-data>

</sequence>

```
<sequence seq-type="Protein">
<seq-name>DTD_RAT</seq-name>
<seq-info><length>1354</length></seq-info>
<seq-data>-----MSENKEQ
HNLSPRDLPEEAYGFPELPLGAQRGSSTDLRQFEPDRRRRAFRRHIMELHEKPDNTNIRQLVMRKLQKSCQCNCATKIRNRIF
DFFPVLRWLPKYDLK-KNILGDMMSGLIVGILLVPQSIAYSLA---GQEPIYGLYTSFFASIIYFLFGTSRHISVGIFGILCLMIGE
VVDRELHKACPDIDTTSSSIAMFNSGCVVNHNTLDGL--CDKSC-----YAIKIGSTVTFMAGVYQVAMGFFQ
VGFVSVYLS DALLSGFVTGASFTILTSQAKYLLGSLP-----RNGVGSVITTWIHFIRNI-----HKTNICDLITSLCLLVLPVK
ELNEYFKSK-----LPAPITELIVVVAATLASHFGK-----LNENYNSSIAGQIPT-GFMPPQAPDW-----
---SLIPNVAVDAIAISIIGFAITVSLSEMFACK-HGYTVKANQEMYAIGFCNIIPSFHCITTSAAALAKTLVKES-TGCQTQLSAIV
TSLVLLLVLLIAPLFYSLQKCVLGVITIVNLRGALL--FRDLPKMWRLSRMDTVIWFVTMLSSALLS-TEIGLLVGVCFMFCV
ILRTQMPKISLLGLEEESIFESISTY-----KNLRSKSGIKV
FRFIAP-LYYINKECFKSALYKKTLPVVLKAAWKKAARKLKEETVTFHG-----DPDEVS
MQLSHDPLELHTVVIDCSAIQF--LDTAGIHTLKEVRRDYEA----GIQVLLAQC-NPSVRDSLAKGEYC-KKEEEN-LLFYSLSEA
VAFAEESQKEKGVCVVNGLSLSD-----
-----</seq-data>
</sequence>
```

```
<sequence seq-type="Protein">
<seq-name>DTD_HUMAN</seq-name>
<seq-info><length>1354</length></seq-info>
<seq-data>-----MSESKEQH
NVSPRDSAEGNDSYPSGIHLELQRESSTDFKQFETNDQCRPYHRILIERQEKSDTNFKEFVIKKLQKNCQCSPAKAKNMILGF
LPVLQWLPKYDLK-KNILGDVMSGLIVGILLVPQSIAYSLA---GQEPVYGLYTSFFASIIYFLLGTSRHISVGIFGVLCMIGETV
DRELQKAGYDNAHSAPSLGMVSNSTLLNHTSDRI--CDKSC-----YAIMVGSTVTFIAGVYQVAMGFFQV
GFVSVYLS DALLSGFVTGASFTILTSQAKYLLGLNLP-----RTNGVGLITTWIHFVIRNI-----HKTNLCDLITSLCLLVLLPTKE
LNEHFKSK-----LKAPIPIELVVVVAATLASHFGK-----LHENYNSSIAGHIPT-GFMPPKVPEW-----
--NLIPSVAVDAIAISIIGFAITVSLSEMFACK-HGYTVKANQEMYAIGFCNIIPSFHCFTTSAAALAKTLVKES-TGCHTQLSGVV
TALVLLLVLLVIAPLFYSLQKSVLGVITIVNLRGALRK--FRDLPKMWSISRMDTVIWFVTMLSSALLS-TEIGLLVGVCFIFCVI
LRTQKPKSSLLGLVEESEVFESVSAY-----KNLQTKPGIKI
FRFVAP-LYYINKECFKSALYKQTVNPILIKVAWKKAAKRKIKEKVVTLGG-----IQDEMS
VQLSHDPLELHTIVIDCSAIQF--LDTAGIHTLKEVRRDYEA----GIQVLLAQC-NPTVRDSLNTNGEYC-KKEEEN-LLFYSVYEA
MAFAEVSKNQKGVCPNGLSLSSD-----
-----</seq-data>
</sequence>
```

```
<sequence seq-type="Protein">
<seq-name>SAT1_RAT</seq-name>
<seq-info><length>1354</length></seq-info>
<seq-data>-----
-----MDASPEPPQKGGTLVLVRRQPPVSQGLLET LKARLKKSC TCSMPCAQALVQGLFPVIRWLPQYRLK-E
YLAGDVMSGLVIGIILVPQAIAYSLA---GLQPIYSLYTSFFANLIYFLMGTSRHVNVGIFSLCLMVGQVVDRELQLAGFDPS
```

QDSLPGNNDSTLNNTATLTVGLQDCGRDC-----HAIRIATALTLMAGLYQVLMGILRLGFVSTYLSQPLLD  
GFAMGASVTILTSQAKHLLGVRIP-----RHQQLGMVIHTWLSLLQNV-----GQANLCDVVTSAVCLAVLLTAKELSDRYRH  
Y-----LKVVPTELLVIVVATIASHFGQ-----LHTRFGSSVAGNIPT-GFVAPQIPDP-----KIMWSV  
ALDAMSLALVGSAFSISLAEMFARS-HGYSVSANQELLAVGCCNVLPAFFHCFATSAAASKTLVKIA-TGCQTQLSSVVSAAV  
VLLVLLVLAPLFHDLQRCVLACIIVVSLRGALRK--VKDLPQLWRLSPADALVWVATAATCVLVS-IEAGLLAGVFFSLLSLAGR  
TQRPRALLARIGDSTFYEDAAEF-----EGLPPPEVRV  
FRFTGP-LYANKDFFLRSLSLTGLDAGYSATRKDRGTEVGVSNRSLVDRKDLG-----SVSS  
GDGLVVPLAFGFHTVVIDCAPLLF--LDVAGMATLKDLRKNYRAL----DITLLACC-SPSVRDTLRKGGFLGEDQGTAEELLFP  
SVHSAVETACARREELMAADSAL-----

-----</seq-data>

</sequence>

<sequence seq-type="Protein">

<seq-name>DRA\_HUMAN</seq-name>

<seq-info><length>1354</length></seq-info>

<seq-data>-----

-----MIEPFGNQYIVARPVYSTNAFEENHKKTGRHHKTFLDHLKVVCCSCSPQKAKRIVLSLFPIASWLPAYRLK-E  
WLLSDIVSGISTGIVAVLQGLAFALLV---DIPPVYGLYASFFPAIYLFPGTSRHISVGPFPILSMMVGLAVSGAVSKAVPDRNA  
TTLGLPNNNSNSSLDDER-----VRVAAAASVTVLSGIIQLAFGILRIGFVVIYLSLISGFTTAAAVH  
VLVSQKLFIFQLTVP-----SHTDPVSIFKVLVSVFSQI-----EKTNIADLVTALIVLLVVSIVKEINQRFKDK-----LP  
VPIPIEFIMTVIAAGVSYGCD-----FKNRFKVAVVGDMPN-GFQPPIPDV-----ETFQNTVGD CFGIAMVAFA  
VAFSVASVYSLK-YDYPLDGNQELIALGLNIVCGVFRGFAGSTALRSVAVQES-TGGKTQIAGLIGAIIVLIVVLAIGFLLAPLQ  
KSVLAALALGNLKGMLMQ--FAEIGRLWRKDKYDCLIWIMTFIFTIVLG-LGLGLAASVAFQLLTIVFRTQFPKCSTLANIGRT  
NIYKNKKDY-----YDMYEPEGVKIFRCPSPIYFANIGFF  
RRKLIDAVGFSPRLRILRKRKALRKRKLQKQGLLQVTPKGFICTVDTIKDS--DEELDNNQIEVLDQPINTTDLPFHIDWDDDL  
PLNIEVPKISLHSLILDFSAVSF--LDVSSVRGLKSILQEFIRI----KVDVYIVGT-DDDFIEKLNRYEFF-DGEVKSSIFLTIHDAVLH  
ILMKKDYSTSKFNPSQEKDGKIDFTINTNGGLRNRVYEVVETKF-----

-----</seq-data>

</sequence>

<sequence seq-type="Protein">

<seq-name>Q9WVC8</seq-name>

<seq-info><length>1354</length></seq-info>

<seq-data>-----

-----MIEAIGNQYVVARPVYSTKTFGEFEKKTGRHHKTFLDHLKGVCCSCSSQKAKKIALSLFPIASWLPAYKIK-E  
WLLSDIVSGISTGLVAVLQGLAFALLV---NIPPAYGLYAAFFPVITYFFLGTSRHISVGPFPVLSMMVGVVTRVVSD--PNAS  
SELSSSSTENDSFIE-----EKVMVAASVTVLSGIIQLLLGVLQVGFVVIYLSLISGFTTAAAIHVL  
VSQKLFMLQLPVP-----AYSDPFSIFKVLVSVFTQI-----QKTNIADLVTSVIILVVVVFKEINQRYRSK-----LP  
VPIPIELIMITVIATGVSYGCN-----FEDRFGVAVVGNMSL-GFQPPIPSV-----EVFQDTIGDSFGIAIVGFAVAF  
SVASVYSLK-YDYPIDGNQELIALGVSNIFTGAFKGFAGSTALRSVAVQES-TGGKTQVAGLLSAVIVLIVIVAIGFLLQPLQKSV  
LAALALGNLKGMLMQ--FAEIGRLWKKDKYDCLIWIMTFIFAIVLG-LGLGLAASVAFQLLTIVFRTQFPKCSTLANVGRSNIY  
KNKKNY-----AEVYEPEGVKIFRCPSPIYFANIGFFKQK

LIDAVGFSPLRILRKRKALKKIRKLQKRGLIQMTPKGFICTSDGFKDS--DEELDNNQIEELDQPINTTDLPFIDWNGDLPL  
NITIPKISLHSLILDFSAVSF--LDVSSMRGLRTLQEFIRI----KVDVYIVGT-DDDFIDKLARCEFF-DDEVTDSSIFFLTIHDAILHIL  
MKKDYSTSKFNSSQEKERKFDFITNTNGGLRNRECQVPVETKF-----

-----</seq-data>

</sequence>

<sequence seq-type="Protein">

<seq-name>PEND\_HUMAN</seq-name>

<seq-info><length>1354</length></seq-info>

<seq-data>-----

-----MAAPGGRSEPPQLPEYSCSYMVSRPVYSELAFQQQHERRLQERKTLRESLAKCCSCSRKRAFGVLKTLVPILEWLPK  
YRVK-EWLLSDVISGVSTGLVATLQGMAYALLA---AVPVGYGLYSAFFPILTYFIFGTSRHSVGPFPVVSMLVGSVLSMA---  
-PDEHFLVSSNGTVLNTTMIDTAARDT-----ARVLIASALTLLVGIIQLIFGGLQIGFIVRYLADPLVGGF  
TTAAAFQVLVSQKIVLNSTK-----NYNGVLSIIYTLVEIFQNI-----GDTNLADFTAGLLTIVVCMVAVKELNDRFRHK-----  
-----IPVPIPIEVIVTIIATAISYGAN-----LEKNYNAGIVKSIPR-GFLPPELPPV-----SLFSEMLAASFIAV  
VAYAIASVSVGKVIYATK-YDYTIDGNQEFIAFGISNIFSGFFSCFVATTALSRTAVQES-TGGKTQVAGIISAAIVMIALALGKLL  
EPLQKSVLAADVIANLKGFMFMQ--LCDIPRLWRQNKIDAVIWFVFTCIVSILG-LDLGLLAGLIFGLLTVVLRVQFPSWNLGSL  
IPSTDIYKSTKNY-----KNIEEPQGVKILRFSSP-IFYGNV  
DGFKKCIKSTVGFDAIRVYNKRLKALRKIKLIKSGQLRATKNGIISDAVSTNNAFEPDEDIED-LEELD--IPTKEIEIQVDWNS  
ELPVKVNVPKVIHSLVLDCAISF--LDVVGVRSLRVIVKEFQRI----DVNVYFASL-QDYVIEKLEQCGFF-DDNIRKDTFFLTV  
HDAILYLQNQVKSQEGQGSILETITLIQDCKDTLELIELELTELTEEELDVQDEAMRTLAS-----

-----</seq-data>

</sequence>

<sequence seq-type="Protein">

<seq-name>YLDM\_CAEEL</seq-name>

<seq-info><length>1354</length></seq-info>

<seq-data>-----

-----MSLRQLFSDRPPLNAVLQEKAQQLRY--ACSPSKCIHSLLSFLPIITWLPKYDWS-HSFFGDLSG  
GLTMAVFSVPQGIALASIT---GVPPVYGLYTAIFPSFLYIFFGTSKHNALGGFAVLSLMTGHAIEKVMLRTATSYNATAYVNH  
TLDELLENKNETALISNTTLMQILGNETSFVEEVTMEMWTEGVTPVKQIHVATTIIFLAGVIQVFMGVFRLQYLTSLFSEQV  
MSGFVVGGGIHVFFAQIGNMLGIELP-----RRSGPGYLYRIWDLVENL-----DNVHIPTVCISLSSFLFLVFGKEYLAPWLN  
SA-----FNYPVPFELVLLTHYLINR-----FPPPSLPRF-----DLIRHIGLNAAAIAT  
AVAIHITVAKVVEKR-YKYKINHGQELYALGFVGVLSFFFPVFPVTSGFARSVVGAA-VGGSTQLTCLFSSLALLSVILCIGPALE  
YLPQCILSAMIIFAQKGMLEK--FGELKSLWPVFKIDFTIWLMSFFLTVCYD-MGEGLLMAIGFAVLTTIIRTQRPKWHFLSRD  
DDTENYKETKKR-----DLERIQGNVCIFRMDAP-LIFTSS  
DRFTMSVWQCCKWERCKSESFVTIEQMNSDRSADIFDSKLSARRRWKR-----DQKSEN  
-RCKLVIDCDGFPY--VDYLGLSTLKSIVYDLQAA----GIQCFVQVQ-KSDLKKLFRATDFY-EVDES-KVFNKVGDAVKAEEQ  
HISSPKTTKEILTALASIATDTVLIDEESDSNDNDDAEIQERITEESEENSEEVMSETSIVSIEDATSLTSSRNSINSEE-----

-----</seq-data>

</sequence>



<sequence seq-type="Protein">  
<seq-name>O17951</seq-name>  
<seq-info><length>1354</length></seq-info>  
<seq-data>-----MIH  
VEEEYDQLRSFY---AKKRRRA-----PMNQVEYDEKYGYQKRLKDGGKFKKRSTKVASRYVPFTSVTNFKIFLLNLFPIFGWL  
PKYDWK-NSLTSDVVGGITVGVLQIPQGIAYAILS---RQDPVGLYTSIYPVFLYIFFGTSKHASLGTFVVALMTGLAVEREAF  
IPSDNLNSTLLPG--DEALP-----SPIEVSCALVLGVGLIQFLMGVFRLLQFLTTYLSAQIAGFTT  
GSAVHVLVSQFKELFGLRGLV----KHSRPGYLIRNVYDTVTNL-----PKANFMCCAISLATMILLHCGKEYINPIMKRKMK--  
-----SNIPIWELVAVIISTIFVALID-----ANELYNVKIVNKIPT-GLPELSLPNP-----NLIPRVLPAISIA  
VVVVAVHLSLSKMLAKK-YEYEIDAGQELYALSFTAIGGSFFPTFPTSIGLGRTMVGVE-SGVKTQVATFFSCLFVLSVSLYFGR  
FLETLPMCVLSAIIVIALKSMMLWK--LRDLKGIWKLKIDCCIWMAFFATVLDV-VSEGLLIAIFFALFTTILREQYPKWHLLAN  
VKDTDEFSDTQQY-----QETIFYKGCIFKFDAP-LLFHN  
VECFKKCIEKVYDEWKKSSSEFNFKVKEPNAGKGSKFTFEGMHRIAPITEIPLH-----PGINRDPIPL  
RHFVIDCSGFTF--IDLMDGVSALKEVFSDLRKK----RVQVYFAST-KVPVREMFEKCSFF-DFVSKE-NFYPTLRDATGIARLRQT  
E-----  
-----  
----</seq-data>  
</sequence>

<sequence seq-type="Protein">  
<seq-name>O17950</seq-name>  
<seq-info><length>1354</length></seq-info>  
<seq-data>-----MAPPGRINH  
ARHLSEAEAAAENYLEHFYKSEPNKRRVSVFVQRGAMNQAQFDEKFDYNKPHLENELKKQAKKFVRRFYEPFTSFFALKLFI  
FDLIPILKWFPEYKWK-TDLSLDIIGGITVGVMQVPQGIAYALLA---KQPAINGLYTSLFPPLIYMLFGTSRHASLGTFVAVSL  
MTGLSVEKLAAPTDDYDPSFNETDIDLVLKLP-----SPTEVSCAITITMGLILFVMGVLRLQFLTT  
YLSAQVIAGFTVGSSVHVLVSQKLTLLGIRGLP----RHSGPFYLFRLHYDLVMSI-----TRANPVSCGISIVSIIVLHFGKEFINP  
FIKRKTK-----SNIPIWELVIVILSTVFAVVG-----VDTEAKVQVVKIPV-GVVPNFSLPF-----YLIP  
QVLPDAISITVVSISVWLSISKMLAKR-YNIELDSGQELFALSFAISSSIFPSIPNSCSLRTLVAVG-AGCTTQLSIFSSLIVFSV  
VIFLGTLETLPMAALSIIICVALQGMFRK--FADLIDLWKVSKIDFTIWWVSCVSTILLD-VSTGLIISVCFALFTTILREQYPKW  
HLLASVKGTDQFRDAERY-----GETVYFKGCIFRFDAP-  
LLFHNVECFKKSIEKAYTEWQKSHEFYVLRERETILNKLKDGSDSIDGKMFQTAQST-----LNT  
HSPDILSRHFVIDCSGFTF--IDLMDGVSALKEIFSDMRKR----GILVYFANA-KAPVREMFEKCHFF-NFVSKE-NFYPTMRDAT  
SIARQRQLELGFKDTGYVPEHDLRLEVLSSHMP-----  
-----  
-----</seq-data>

</sequence>  
<sequence seq-type="Protein">  
<seq-name>Q19447</seq-name>  
<seq-info><length>1354</length></seq-info>  
<seq-data>-----  
-----MKQEEYDQMYSFNREGNETWVKKKINNYCTFLSKDGIRKILRRVPVIDWIGSYQIN--NFASD  
FIAGLTMGVYNVPQAMSYSILA---GLPPVYGLYASFFPPFLYSIFGSAKHSSIGVFSITCLMVDKCVKMLKFRNENPESEL---

-----ISIFSDKLYNFWAQNSPAVMAIFRCDKPMKFLGAPAISAITFSACFFGVVVSQIPKL  
CGFSVPS-----RNEHWFSLVHSILDIFENC-----HKSNTATLCSASALVFLIGSRIFIEPFFKNHKKL-----QSIPFPKE  
LITIVIATSASYFFD-----FEHRFGVKTHTVPR-GFPYDPVRI-----DIWPYIFQDALSIAVVAVTMAMGQEF  
ATK-HRYRIDSNQELLALGFINIGSSFFSVFPTSASFRTLVNER-SGAKTQLSGITSACFMALVITTIGPYLASLPSCILSAIVIVVL  
ESMLRK--CTVLPGLWRCSKHDFWIITAVVTLSSD-IAQGVAAGIFTAIFTIAIQSQOPTIKLLGQI-RPNDFRPMNHY-----  
-----SLAKETS-FRIIRFDAP-LIFANVEKFLDNVRDSTSATTCK  
RS-----ASCDSQEDIEWSAIIILDCHTWIY--TDSMGIAAVKQINEEL  
RQI---RILLFANL-KSSLRRQYGNAGLIGEGNIGRNQMYPSIQDALDSAHELKHNHMKMFFDCEKSMPPEKIVP-----  
-----</seq-data>

</sequence>

<sequence seq-type="Protein">

<seq-name>Q23454</seq-name>

<seq-info><length>1354</length></seq-info>

<seq-data>-----  
-----MKEVYQPCTTTDQDIVEKKECSP--FRKKLQKYIPILEWLPNYQWK-DHFHGDVIAGL  
TVGIMHVPQGMAYASLA--GVPPVYGMYSFFASTIYMFFGTARHISIGVFAVASMMVGAARLRLAPDIPISNSSDINPSV  
YPLGEYV-----DPLVFTSALTLLGVVQIIMGILRLGFLTLYLSDSLVSGFTTGAAVHVFTSQLN  
KVFGIKLP-----RHEGIGMIVRMYRDMIMSL-----GSVNFVALGISIFGILFLDLGRTYINPIVKKF-----SPIPPPL  
ELILVIFGIVISMIFN-----LDAEYHVKTVEIIPR-GFPLPSIPRL-----NFLPALLSDAIIAVVCYMFVMSMGKLF  
KK-HKYKTDATQELYAIGIASALSSFFPVYPVGASLSRSSVCEM-SGANTQLYTIFSSFLLLTVILLGPFLEPLPMCILACIVIVSL  
KSLFMQ--VKELPRLYRISKYDFAIWLVACLSTIFTD-VTTGLVISLAFSLYTLVLRQQWPSFSTVLHDET-----  
-----PRQNVPENVKIVKFAGS-LHFANVTAQDDMGAEIG-----  
-----KLPEEDPLIDERTIILDASSVAF--IDIMGVDALRDVFKDALKL---G  
VHVFCGL-PEDVLSVLSNDENF-LSVVPSTFFPSIDSCLISFVHQQSV-----  
-----</seq-data>

</sequence>

<sequence seq-type="Protein">

<seq-name>Q9S6X8</seq-name>

<seq-info><length>1354</length></seq-info>

<seq-data>-----  
-----MNNSFTLKQQWFGN--IRKDILAGILVALALIPEAIGFSII  
A--GVDPMVGLYASFCIAIIISIFGGRPGMISAATGSMAMVVMVSLVAD-----  
----HGLQYLFAATILTIIQVILGISKIARLMKFIPRSVMIGFVNALAILIFSAQLPQFEG-----ASW  
SMYAMLAGSLVIIYVLRPT-----TAVPSPLVAIIVMTIIAVTFHVDV-----RTVGDMGNISS-SLPHF  
LIPDVPF-----TFETLQIIFPYSIALAFVGLLESLLTAQIIDEM-TDTSDKNKESRGQGIANIVTGFFGGMAGCAMILGQS  
VINTK-AGGRGRLSAFVAGAFMLFLI AVLSHVVVKIPMAALVAVMVMVSVGTDFDWSL--KGLKKAPLTD SIVMVTVVT  
VVVTDDLSKGVFVGVLLSAVFFVAKISKLVKIVSHA-----  
-----EDQKLRTYQVKGQ-IFFASVTDLTNAFIYQE-----  
-----DIERVVIDLTEAHV--WDDSGAAALDKIVAKFKEQ---GIEAELKGL-NKASKSLMKQMA-----  
-----

-----</seq-data>  
</sequence>  
<sequence seq-type="Protein">  
<seq-name>Q9RBV5</seq-name>  
<seq-info><length>1354</length></seq-info>  
<seq-data>-----  
-----MLHSLKQTWLSN---IRGDILAGLVVALALYPEAIAFSIIA  
---GVDPKVGLYASFCIAVVIAFVGGRRPGMISAATGAMALLMVTLVKN-----  
----HGLEYLLAATLLCGVLQIAAGYLKLGSLMRFVSRVVTGFVNALAILIFMAQLPELTN-----V  
TWHVYAMTAAGLGIIYLFYVPKIG-----KLIPSPLVCIIVLTAVAMSVGLDI-----RTVGDMGELPD-T  
LPIFLWPDVPL-----TFETLAIIFPYSAALAVVGLLESMMTATIVDDL-TDTPSDKNRECKGQGVANIASGLIGGMAGCA  
MIGQSIINVK-SGGRSRLSSLAAGVFLLLMVVFLGDWLKQIPMAALVAVMIMVSIPTFSWDSL---RNLKKHPLSTNIVMVV  
TVVVVVATHNLAFGVLAGVLLAAMFFANKVGHYMAISSSL-----  
-----DEAGEHRSYNTGQ-VFFSSADKFVAADFKE-----  
-----ALNKVTIDLNRAHF--WDITAVAALDKVVIKFRRE---GTEVEVLGL-NEASATIVDRFGVHDKPDAI  
DQLMGH-----  
-----</seq-data>

-----</seq-data>  
</sequence>  
<sequence seq-type="Protein">  
<seq-name>O07488</seq-name>  
<seq-info><length>1354</length></seq-info>  
<seq-data>-----  
-----MLLSSTRKDWLGN---VRGDVLAGIVVALALYPEAIAFSII  
A---GVDPQVGLYSAFCIPLVMAFFGRRPAMISSSTGAMALLMVTLVKD-----  
-----HGLQYLLAASILTGVFQLIAGYLKLGGLMRFVSRVVTGFVNALAILIFMAQLPELTN-----  
VTWHVYAMTAAGLGIIYLFYIIN-----KTIPSPLVCIVVLTGIAMWLHLDV-----RTVGDMGKLPD-  
SLPVFLLPDVPL-----NLQTLIILPYSAGLAVVGLLESMMTATIVDDM-TDTPSDKNRECKAQGIANICTSFIGGMAGC  
AMIGQSVINVK-SGGRGRLSTLTAGVLLCLIVFLRDWVSQIPMAALVAVMIMVSIPTFSWRSI---ANLRTHPLSTSVVMLA  
TVAVVVATHNLAFGVLTGVLIASLNFATKVSFRMRVTSVL-----  
-----EGTSRTYTVTGTGQ-VFFASADRFTSHFDRE-----  
-----AIENVVIDVSHAHF--WDITSVSALDKVVIKFRRE---GAGVEIRGM-NEATRIVDRFGVHDKPEEVEKL  
MGGH-----  
-----</seq-data>

-----</seq-data>  
</sequence>  
<sequence seq-type="Protein">  
<seq-name>P73474</seq-name>  
<seq-info><length>1354</length></seq-info>  
<seq-data>-----  
-----MINWTILKREWFRN---TKEDLLAGAVVGLALYPEAIAFSI

IA---GVDPKVGLYASFTIAVLTAFFGGRSGSISAATGAMALLMVDLVKD-----  
----HGLQYLLAATVLTGIFQVLLGVFKVAKQMRYVPRAVVLGYINALAVLIFLAQLPQLDPTKVS-----  
---QYWLVLVYLILACSLAIIYILPTFT-----KVFPSPLVALFVMTNATIFLQLDV-----PTVGDMGELPG-S  
LPIFLLPQIPF-----NWQTLQIILPYSLTLAIVGLLASFLTASLVDEL-TDTPSDKNREAKGQGIANIVTGFFGGMAGCGMI  
GQSVINVQ-SGGRGRLSTFAAGIFLLIAILGLKDWVQQMPMATLVAVMIMVSIQTRWSSL---RDFRKIPQSENIVMFTTM  
GLIIITRNALGVAAGIIMSTIFFTRKIAQLVFVDRVL-----  
-----TEDENHRIYNVSGQ-IFFVSKEEFLEAFDFDE-----  
-----LVDRVTIDLTHAHL--WDQGAVGTVTEQIMTKFRRN---GIDVELVGL-NGASATLWQKLIKEPELKLINSSAEN--  
-----

-----</seq-data>

</sequence>

<sequence seq-type="Protein">

<seq-name>Q9X8E9</seq-name>

<seq-info><length>1354</length></seq-info>

<seq-data>-----

-----MTPTPPAARLRALKPDWLNDPKVWRTEILAGLVVALALIPE  
AIFSIIA---GVDPAIGLFASFTMAVTISIVGGRRAMISAATGAVALVIAPMRE-----  
-----HGLGYLIATVILAGVFQIVLGAVGVAKLMRFVPRSVMTGFVNALAVMIFMAQVPEMHD-----  
-----VPWPVYPLIVGGLALMVFFPKVT-----RVVPAPLVSVILTITVAAGIAV-----PTVGD  
KGELPS-SLPVPLPDVPF-----TLDTLTTVAPYALAMALVGLMESLMTARLVDDI-TDTHSSKTRESIGQGVANIVTGF  
FGGMGGCAMILGQTMINVKVS GARTRVSTFLAGSFLMVLCIVFGPVVSDIPMAALVAVMVMVAFGTFDWH SVAP-KTLK  
RMPAGEIAVMIITVIVVVATDNLAIGVVVGTVTAMVVFARRVAHLAQTAVT-----  
-----DPDGTTVVYRVTGE-LFFASSNDLVGQFDYAG-----  
-----DPDRVVIDLSAAHI--WDASSVAALDAIETKYGQR---GKSVEITGL-NTPSADLH  
GRLTGELTGSH-----

-----</seq-data>

</sequence>

<sequence seq-type="Protein">

<seq-name>Q50443</seq-name>

<seq-info><length>1354</length></seq-info>

<seq-data>-----

-----MSITLPGLRAPSSGNGLASLRSPSV---LRTEVLVAGLVVALALIPEAI  
AFSVIA---GVDPRVGLFSTVTMAITIAFTGGRPAMITAATAAVALVAVPARE-----  
-----FGVGYLVA TILLAGVIQMLLALFGVAKLMRFIPRSVMVGFVNALAILVFVSQLQHLVD-----  
-----VPWL VYALTAVGIAVMFLLPKVT-----TAVPAPLVVVLVLTVAVVAFGWDV-----PDVGD  
QGALPD-SLPVPLPHVPL-----TLHTLQVIAPYAFGAALVGLLESMTAKLVDDI-TDTPSNKTREACGQGTANVVTAL  
FGGMGGCAVVGQTM MNVKVAGARTRLSTLLTG VFLV LVALGDLVGRIPMAALVAVMIVVSFATFDWHSITP-RTLKVL  
PRSETLIMLITVACTVATGNLAIGVSVGLAAMVAFARRVAHFTSVSAE-----  
-----PGPDDSR TYRVRGD-LFFVSSNDLVHQFDYAG-----  
-----DPDEVVIDMSGVSL--WDASSVATLDAIRLKYSSR---GKTVAFTGL-DGESLDRLNRM

```
SGRLGV-----
-----
-----</seq-data>
</sequence>
<sequence seq-type="Protein">
<seq-name>O06984</seq-name>
<seq-info><length>1354</length></seq-info>
<seq-data>-----
-----MRFSGRFKGYNLQ--KFQKDLIAGIVVGVVAIPLGMAF
AIAS--GVEPEYGLYTVVIAGICISLFGGSKYQIGGPTGAFVPIILFGIIMQ-----
----YGLENLLIAGFMAGVMLVLFGLFKLGKIMKFPKPVIVGFTAGI AVLIFTEQIANFLGLRNV-----EKHENFHNNMFEIV
QQL-----GTFNVYAILTAVIGLVILLVSAKVM-----PKVPGALLALLISTVVAVVFFP-----DRMATIG
STYGEIPR-HLPEFQFPEL-----TLDKMVMLFPAALVIALLGLESILSAMVADNM-KGSKHDSNKELVGQGIANMA
APLFGGIPATGAIARTATNIK-NGAVSPVSGVVHGVVLLVLLVFAPYASHVPLASMAPILMVVAWNMSERK---EVANML
RLKNADSFILAATFALTVLFD-LIIGVATGLLAFVFFIRRMSEATRIHNQET-----
-----HPVLAKREDPSVSMYAIIEGP-LFFGSIDSLESSLLEHVQKK-----
-----PKTLILLMNKVHY--MDTSAEAVLGNIMNRIKRH----NGKLMIVGL-QSQPKELLHK
TGLF-HKIGKQ-HFFDHHDEITG-----
-----
-----</seq-data>
</sequence>
<sequence seq-type="Protein">
<seq-name>YCHM_ECOLI</seq-name>
<seq-info><length>1354</length></seq-info>
<seq-data>-----
-----MPFRALIDACWKEKYTAA--RFTRDLIAGITVGIIAIPLAMAL
AIGS--GVAPQYGLYTA AVAGIVIALTGGSRFSVSGPTAAFVVILYPVSQQ-----
-----FGLAGLLVATLLSGIFILMGLARFGRLIEYIPVSVTLGFTSGIGITIGTMQIKDFLGLQM-----AHVPEHYLQKVGALF
MAL-----PTINVGDAAGIVTLGILVFWPRLGIRLP-----GHLPALLAGCAVMGIVNLLGGHVA-TIGSQFH
YVLADGSQNGGIPQ-LLPQLVLPWDLNSEFTL-----TWDSIRTLPPAAF SMAMLGAIESLLCAVVDGM-TGTKHKANSEL
VGQGLGNIIAPFFGGITATAAIARSAANVR-AGATSPISAVIHSILVILALLVLAPLLSWLPLSAMAALLLMVAWNMSEAHK--
VVDLLRHAPKDDIIVMLLCMSLTVLFD-MVIAISVGIVLASLLFMRRRIARMTRLA-----
-----PVVVDVPDDVLVLRVIGP-LFFAAAEGFLTDLESRL-----
-----EGKRIVILKWDAVPV--LDAGGLDAFQRFVKRLPE----GCELRVCNV-EFQPL
RTMARAGIQ-PIPGRL-AFFPNRRAAMADL-----
-----
-----</seq-data>
</sequence>
<sequence seq-type="Protein">
<seq-name>O84864</seq-name>
<seq-info><length>1354</length></seq-info>
<seq-data>-----
```

-----MVKVSLSFKHLVPKLVTCLEKGYSFN--TLKKDFTAGITAGILAFPLA  
IAIAIGI--GVSPQLGLLASIIIGGFLASALGGSRVLISGPTSSFISILYICIGVK-----  
---YGEDGLFTITLMAGIFLIIFGLAGLGTFIKYPYPVVTGLTTGIAVIIFSSQIRDFLGLQMG-----DGVPLDFIGKWAAYW  
DYL-----WTWDSKTFAVGLFTLLMIYFRNYK-----PRYPGVMISIIASTLVWILKIDI-----PTIGSR  
YGTLPSSLPGPVFPHI-----SITKMLQLMPDALTISVLSGIETLLAAVVADGM-TGWRHQSNQCQLIGQGIANIGTSLF  
AGMPVTGSLSRRTASIK-CGASTPIAGIIHAICLSFILLLAPLTIKIPLTCLAAVLILIAWNMSEIH---HFIHLFTAPKKDVVLLTV  
FILTVMTT-ITSAVQVGMMLAAFLFMKQMSDLSDVISTAKYFDESEQPQNDL-----  
-----LFSKNEVPPFTEIYEINGP-FFFGIADRLKNLLNEIEKP-----  
-----PKIFILCMTRVPT--IDASAMHALEEFFLECDRQ---GTL LLLAGV-KKTPLSDLRRYHVD-ELIG  
VD-HIFPNIKGALLFAKALIKLESKSSQ-----

-----</seq-data>

</sequence>

<sequence seq-type="Protein">

<seq-name>Q9Z6P5</seq-name>

<seq-info><length>1354</length></seq-info>

<seq-data>

-----MKVPWAFKNFIPKLYTSIKEGYSFN--TFKKDFQAGITVGILAFPFA  
IAIAIGV--GVSPIQGLLASIIIGLLASAMGGSNVLISGPSSAFISILYCLSAK-----  
-----YGAEALFTVTLTAGVFLIAFGLTGLGTFIKYPYPVVTGLTTGLAIIIFSSQIKDFLGLQMG-----ANIPADFLPKWIAW  
WDHL-----WTWDSKSFVAVGLFTLLMIYFRNYK-----PRYPGVMIAIVTATTLVWLLKIDI-----PTI  
GSRYGTLPT-AIPLPKIPQL-----SITKILQLMPDALTIAVLSGLETLLSAVVADGM-TGWRHQSNQCQLVAQGVANIGT  
SLFSGIPVTGSLSRRTAASIK-SEATTPIAGIVHSIFICIFILLLAPLTVKIPLTCLAAVLILIAWNMSEIH---HFIHLFTAPKKDIVVLLT  
VFILTVMTT-ITAAVQVGMMLAAFLFMKQMSDLSDVISTAKYFDKDSDFLSKA-----  
-----EVPQNTEIYEINGP-FFFGIADRLKNLLNDIEKP-----  
-----PKIFILCMTRVPT--IDASAMHALEEFFLECDRQ---GTL LLLAGV-KKTPLADLKRYHLD-ELIG  
VD-HIFSNIKSALLFAQALTNLESKTSTRHLV-----

-----</seq-data>

</sequence>

<sequence seq-type="Protein">

<seq-name>O33206</seq-name>

<seq-info><length>1354</length></seq-info>

<seq-data>

-----MLQR--IARELLSGVAVAIVALPLAIAFGITATG  
TSQGALIGLYGAIFAGFFAAVFGGTPGQVTGPTGPITVVATATIAE-----  
HGLEGAFFAFILAGVFQILFGACRLGSLIRYVPHVVISGFMGGIAIILIMTQLD-----QVRSSS  
LLVLVTVLLASGRFI-----KAIPPSLLVLVSVLPLAAPWLRDLRAGPVSINRTVDYIGEIPQ-AMPSP  
DFPQV-----ANSTMLQVLLSAVAIALGSLDSLTLVMDNI-RGTRHRSNKELIGQGIGNIAAGLFGGLSGAGATVR  
SVVNVN-NGGQTALSAATHSVVLFVAVGLGAVVQYIPLAVLSGILILVAVGMFDWHAM---RKAHVSPRGDVIVMFTTMI  
ITVVVD-LTIAVMVGIALSLLVHRLRSRQRKAKVT-----  
-----QDDTGTYRIDGP-LSFLSVDGVFGSLR-----

-----DGREDVSLDLQHVTY--LDTSGARALLYFIDHSEKD---GVAVSIKRI-PPRLESQTLALADNEQRDKLRTVLESA-----

-----</seq-data>

</sequence>

<sequence seq-type="Protein">

<seq-name>Q55814</seq-name>

<seq-info><length>1354</length></seq-info>

<seq-data>-----

-----MATTLLSPTRFVHGLRFD--NLRGDIFGGITAAIVALPLALAF  
GVAS--GAGPIAGLYGAICTGFFAALFGGTPAQISGPTGPMTVVMMASTFANLTASNPE-----

-----NGWAMALTVMFGGIFQVVLGLLGLGKYITFMPYTVISGFMSGIGVIIIVILQIAPLLGHQTAP-----GVVPS  
LQAIPTYLND-----VNFAALGLGLIALAIVFFSPRLN-----RILPAPLIALVLGTIISMIFFGNV-----

-SLPRIGEIPS-GLPSLHLPYL-----SWGSLQQMLLYSIMLAVLGSLSLTSVADNI-SRSHHDSRELVGQGIGNLVS  
GLCGGLPGAGATMRTVININ-SGGKTPHAGMIHALILLMIVLKAGQLTEPIPHAVLAGILIKVGDIVDWS---FLKRAHQLSTK

GAGLMYLVGLTVFVD-LITAVAVGVFVANLFTVKNLTDLQLESIKSVTRADGEDWLLEE-----  
-----EQQILRAANGRIFMFHLSGP-MSFGAAKSIARRLAIVEN-----

-----YDVLILDLATVPR--LGV TALLAIETMLKDALAK---QREVFLVGA-KGQVQAR  
LQRLPVLAQLSPHHRLESRLALQMAAVCINVD-----

-----</seq-data>

</sequence>

<sequence seq-type="Protein">

<seq-name>Q55415</seq-name>

<seq-info><length>1354</length></seq-info>

<seq-data>-----

-----MQITNKIHF--NLQGDIFGGVTA AVIALPMALAFGI  
AS--GAGATAGLWGAVIVGFFAALFGGTPTLISEPTGPMTVVQTAVIASLVAADPD-----

-----NGLAMAFTVMMAGLFQJAFGLLKLKGYVTMMPYTVISGFMSGIGIILVILQLAPFLG-QASP-----KGGVIGTL  
QALPNLVSN-----VRPVETLLALMTVGIIWFMPSRWK-----KFAPPQLVALVLGTIISITLFGDL-----

----DIRRIGEIQ-GLPALQLPVF-----QADQLQRMLIDAAVLGMLGCIDALLTSVVADSL-TRTEHNSNKELVGQGI  
GNVMSGLFGGLGGAGATMGTVVNIQ-SGGRTALSGLIRAMVLLVILGAAKLAATIPLAVLAGIAFKVGVDIIDWG---FLKR

AHHVSIK GALIMYAVIVLTVLVD-LIAAVGIGVFIANILTDRMSALQSKAVKSISDADDEILLSAN-----  
-----EKRWLDEGNRVLVLLFQLSGP-MIFGVAKAIAREHNAIQE-----

-----CAAIVFDLSDVPH--LGV TASLALENAIEEAAEK---GRAVYIVGA-TGQ  
TKRRLEKLQVFRFPESNCYDDRSEALKDAVLALGPHESEDSPPSSSVQTTY-----

-----</seq-data>

</sequence>

<sequence seq-type="Protein">

<seq-name>P96878</seq-name>

<seq-info><length>1354</length></seq-info>

```
<seq-data>-----  
-----MTIPRSQHMSTAVNSCTEAPASRSQWMLA--NLRHDVPASLVVFLV  
ALPLSLGIAIAS--GAPIIAGVIAAVVGGIVAGAVGGSPVQVSGPAAGLTVVVAELIDE-----  
-----LGWPMLCLMTIAAGALQIVFGLSRMARAALAIAPVVVHAMLGIGITIALQQIHVLLGGTS-----HSSA  
WRNIVALPDGILHH-----ELHEVIVGGTVIAILLMWSKLPKV-----RIIPGPLVAIAGATVLALLPVLQ--  
--TERIDLQGNFFDAIG-LPK---LAEMSPGGQP-----WSHEISAIALGVLTIALIASVESLLSAVGVDKLHHGPRTFNRE  
MVGQGSANVVSGLLGGLPITGVIVRSSANVA-AGARTRMSTILHGVWILLFASLFTNLVELIPKAALAGLLVIGAQLVKLA---  
HIKLAWRT--GNFVIYAITIVCVVFLN-LLEGVAIGLVVAIVFLLVRVVRAPVEVKPVG-----  
-----GEQSKRWRVD-IDGTLSFLLLPRLTTVLSKL-----  
-----PEG-SEVTNLNADY---IDDSVSEAISDWRRRAHETR---GGVVAIVET-SPAKLHHA  
HARPPKRHFASD-PIGLVPWR-----SARGKDRGSAS-----VLDRIDEYHRNGAAVLPHPI  
AGLT-DSQDPYELFLTCADSRILPNVITASGPGDLYTVRNLGNLVP---TDPDDRSVDAALDFAVNQLGVSSVVVCGHSSCAA  
MTALLEDDPANTTTTPMMRWLENAHDSLVS-----VFRNHHPARRSAESA-----GYPEADQLSIVNVAVQVERLTRHPIL  
ATAVAAADLQVIGIFFDISTARVYEVGPNGIICPDEPADRPVDHESAQ</seq-data>
```

</sequence>

<sequence seq-type="Protein">

<seq-name>Q9X927</seq-name>

<seq-info><length>1354</length></seq-info>

```
<seq-data>-----  
-----MSACVPARADSARTKHVHPPHSPPPHGP RRFRV---AGADVSAIAVFLI  
ALPLSLGIALAT--GAPLQAGLVAAAVGGIVAGRIGGCPLQVSGPAAGLTVVTADLIQH-----  
-----YGWRTTCAITVFAGIAQLGLGCLRVARSAVSPAIVHGMLAGIGVTIAVAQLHIVLGGTP-----QSS  
VPDNLVALPAQLANL-----HPADLAVSVLTLTLTLLWPRIPGRAGQAL-----GKLPAALIAVAGATAVAAL  
TGLR---LPKVDLPSSSHALASLPD---GPVLGLV-----AAVLTTLVCSVQSLLGAVAVDKLVAARPSLTG-RVKRSD  
LDRELLGQGAANIVSGSLGGLPIAGVAVRSSANVA-AGAVSRNSTMLHGVLVVAIALLMVPALIELIPLASLAALVMAVGLK  
MVSLN---HIRTVTRH--REVLVYAVTTCGVVFLG-VLEGVALGIAVAVGVALHRLTRTRITHDETE-----  
-----GVHHVHVRGQ-LTFLAVPRLSRVL-HQV-----  
-----PHG-ADAVVELDGSF---MDHAAYETLQDWQKTHTAQ---GGSVDI  
TGR-RPGTRISEPAEEDGRCR---PWPWPWRNHQCERPTAPPRGTAGRSATDGSPAGNLGTSTGPNTPGTRDATGARGA  
TGGSSAPDGPTGHELARGISAFHRNTGPLMRRELARLAREGQQPSQLFLTCADSRVVTSMITSSGPGDLFVVRNVGNFVP  
LPGEESGDDSVAAAI EYAVDVLKVRISITVCGHSGCGAMQALLAAEPGGARTPLQRWLRHGLPSLERALPDVDVDVDLNE  
QEQKRGAGRARPRLAGRGAADTAERLCLANVVQQL EHLRAHDSVARALGAGDLELHGMYFHVGEAQSYLLSEDAEGSV  
FELVRET--NLTA-</seq-data>
```

</sequence>

<sequence seq-type="Protein">

<seq-name>SULX\_YEAST</seq-name>

<seq-info><length>1354</length></seq-info>

```
<seq-data>-----MTSNNSLLGRGRMSY  
SSTAPPRFKRSVDQRDTFSDNFDYDKDSSNRGRITYIAASNSTTGVPNNNSRSGCTNNTNNTNNTSNTSNTNNDSDVDE  
NTVFETLPYYLPCFSWLPEYTFN--KLWGDVIAGISVASFQIPLALSYTTSI--AHVPPLCGLYSLAISPFVYGILGSPQMIVGPE  
SAISLVVGQAVESITLHKENV-----SLIDISTVITFVSGTILLFSGISRFGFLGNVLSK  
ALLRGFISSVGLVMIINSLISELKLDKFLVSLPQHYHTPF EKILFLIDYAP-----AQYHIPTAIFSGCCLIVLFLTRLLKRLMKYH
```



K-----SAIFFPDILLVVIVTILISMKFNL-----KHRYGISIIGDFSMDFDELKNPLT-RP-----RRKLIPDLFSA  
SLIVAMLGFFESTTASKSLGTT-YNLTVSSNRELVALGFMNIVISLFGALPAFGGYGRSKINAL-SGAQSVMSGVFMGVITLIT  
MNLLLQFVHYIPNCVLSVITTIIGISLLEEVPGDIKFHLRCGGFSELFVFAVTFCTTIFYS-IEAGICIGCVYSIINIHKHSAKSRIQLA  
RVA-GTSNFTNLDD-----YMMNMKRNSLDVEGTEEIEGCMIVRI  
PEP-LTFTNSEDLKQRL-DRIERYG-----SSKIHPGRKSLRSKDSIKYVIF  
DLGGMTS--IDSSAAQVLEEIITSYKRR---NVFIYLVNV-SINDKVRRLRFKAGVAASVERAQANNENNTSNTFSDAGETYS  
PYFDSIDAALYEIEKMKIKGNNVNPNDSESFMSNTLFNSSLV-----

-----</seq-data>

</sequence>

<sequence seq-type="Protein">

<seq-name>O59782</seq-name>

<seq-info><length>1354</length></seq-info>

<seq-data>-----

-----MSSPSENHLLGPKTSFIDNRTSTSRPLHEIPSYQSLARRSSTWKRANIPQQKPSLVRRIINYIPVLHWLPNYSLR-  
-NIIWDVLGACSTACLSVPIALSFAQTF--LGVPPPIYILTGTAGPILYCLFTACPLISIGPEAGMCLLIAENIHQRVLSKADVPQE--  
-----TAILVTGLIAFIAGIINLAAGLFRGLFDALVSPVLLRGCILSISMIIMINQGSVFF  
GFSGV---KYKGSDFPIDKLMFLIRNMS-----KANIYTTILSCITISLLIGCRNLKSKLSAKYP-----RIVSIPDAVILL  
LLGSFLSKKFDW-----HSNYGIAILGEIKT-TILLPKLPLPEKN-----KLHFITQSLQTGVMCSFLAFIDTVIAVKAIQLQ-T  
NNLIRSNRELISLGAANIGSSLFCGLPICGGYLRTKCNIM-SGARTQVATIACSVLILLATFFIMPVFSTVPTCMLASMVVSLGV  
SLFADA AVEIFKLARIRVWVWELGIIFSIATCTMMFG-LETGIIFGLSITVMQIIRHSTRSRIMFRSPTSNGTAEFILEDA-----  
-----ASTLSHRTNPSSTAVESAPRILVVRIPEP-LFFANVSQLEDRL-NRLEKY  
G-----HPRMHPGETPYRRIEDIEVVVDFDMVGVSS--IDSSALFAFQRI  
LKEYVEH---QVEVHLVSL-DPQVLHIFEKHGLL-DLIGGYDHSVQDSIKKVDALCDIELGV-----

-----</seq-data>

</sequence>

<sequence seq-type="Protein">

<seq-name>YG35\_YEAST</seq-name>

<seq-info><length>1354</length></seq-info>

<seq-data>

MGRTIRRRRSNSSLSEAISVSLGINQDSSVNMHRASVSAMSPPLCRSYMGGFFTGGNSPMINNLSDSKLPIS  
NKQHPKVIHGSENLHRQTAQLSNEFCSSSVEENSPTIKDYMDIIGNGDRKDDQSMRTIEENIDEEYSDEYSRLLLSPASSNV  
DDDRNRGLQNSSLPELEDGYAGGYQSLRPSHNLRFPRNLWHMCTSFPSKFAHYLPAAVLG---LLLNILDALSYGMIIFPIT  
EPVFSHL---GPTGISMFYISTIISQAVYSGGWSSFPSGIGSEMIEITPFYHTMALAIKEALAGNDDEIIT-----  
-----TTIFCYVISSMLTGVMFYALGKLRGKIVGFFPRHILIGCIGGVGYFLIITGIEVTRV-----AKFEYSWPF  
FSGLF-----TDYDTLAKWLLPVLLTVVLIGTQRYFKNS-----LVLPSFYILTTLVLFHFIVAIIPTLS-----LDAL  
RQAGWIFPIANSKWDYDHYRFLNVHKV-----HWSLVLQQIPTMMALTFGILHVPINVPALAMSLQMDKYDVDRELIA  
HGYSNFFSGLLGSVQNYLVYTNSVLFIR-AGADSPFAGFLIALTICIMIIGPVIISFIPICIVGSLIFLLGYELLVEALV---DTWNKL  
NRFEYLTVVIVFTMGIFD-FVLGIIVGILACFSFLVDSTKLQTINGEYNGNVARSTVYRDY-----  
-----VQTKFLDGIGEIQIYVLKLQNL-LFFGTIISIEEKIERLLQIS-----  
-----NKDATKRRIKYLILDFKNINADNIDYSAAEGFNRIKRFETEK---RIKLISSI-KERDRIYNAF  
NNVGLLND---VELFADLNSALEWCENEFLFQYKQLRKKAKERLEEGKQNNVSAVIAATKNKKIDTIGNGLNRGSNGDTA

RNLMSLPTNTPRNYQILSVAQNVFVNDEQAVKNFKKEYKD-DEPVLPIILLFALKQYRPDIISEVQKVREKEIKFWAQLCPYFT  
RRRLASQSHLLHADNIFFLVETGMLKATYELPQGTLYEIFSNGTCFGKIIAPGNAMPREQKLTETETDSVLWVIDSSSLNK-L  
KEDNLALYVEVALMVMCIKDT--RFKELLYTLVSA-----</seq-data>

</sequence>

<sequence seq-type="Protein">

<seq-name>YA7B\_SCHPO</seq-name>

<seq-info><length>1354</length></seq-info>

<seq-data>-----MPTHSLNQKRSLLYPSIDNGSVPDSSFLSQSFRDTNDIHLLSARLA  
SVEVDPETLPSNSPETNDVSNYDYMSSISYQRAHSLASTSRNDFNYRPSINETRPLLPEREEHSSQLPPAQNQVLPFQSL  
NAPSKLGRGRISLSKIYQFFDDKGPILFILNIPAVIIG---LLLNILDALSYGLILFPISDPLFKNL---GADGLAIYYVSCVVSQVLSL  
GGSFFKGSVGESEMIEVIPFFHQIAFTILNRVGEDNPKSVIA-----TTILAYCLSSILTGLVFF  
ILGILRLGRLEFFPRHILLGCIGGVGSFLVLTAVEVSSRL-----EGSVSFNWASLSALF-----QPMTFAKWSIPLFLSSAL  
EFAQQRWPHP-----FLIPSFVIAIPAIFYVLVWAI PGMS-----LEYLRETGWVFSSTETNVPWYHFYSLFSL  
RDT-----DWSALLATVPEMCALTFFGILHVPINVPALAI SLGLDFVDTDKELIAHGVSNTLSGAVGSIQNYMTYTNSLMFIR  
-SGGNNRLAGIMLALATVALLVIGPGIAYIPVWTVGCLIIYLLGIELLKEESLW---DPIGITTKIEYFTICAIVFTMTVVD-FVVGIVI  
GIIMACVFFVIQASSRSALRGIYSGGIVRSTVRRPM-----N  
QQRFLNEIGRQIQVCKLSGF-LFFGTINGVEKNIAGLIEEL-----  
---NVSNNPLRFLIIDFSLVNG--ADFSVVQAFLRIRMLATM---NVQLCVCGL-DETRSSFKTLTTMCFGDDNCGCQVFED  
VNSSLEYCENMLLDDYDVYR TKLL-----HKAGYSHTLAVPGKHKQNISMAETFPSPRHDLLRQV  
AMSSVKAETKELSKFEKYAKYEQPFLLMQVFGEITTKREDFWLGLCPFFKKAFLRKGDLLWRKGDTPSKLVILETGMVKAS  
YQMDRESLENITCLCVGELPFFSKTCYNATVVAELDSAVWILDREGWETMLKSSDKAEVIENEMLYLTLKMTRDKFNVF  
TNFALNLYR-----</seq-data>

</sequence>

<sequence seq-type="Protein">

<seq-name>O22123</seq-name>

<seq-info><length>1354</length></seq-info>

<seq-data>-----M  
SYASLSVKDLTSLVSRSGTGSSSSLKPPGQTRPVKVIPLQHPDTSNEARPPSIPFDDIFSGWTAKIKRMRLVDWIDTLFPCFR  
WIRTYRWS-EYFKLDLMAGITVGIMLVPQAMSYAKLA---GLPPIYGLYSSFPVVFVYAIFGSSRQLAIGPVALVLLVSNALG  
GIADTNEE-----LHIELAILLALLVGILECIMGLRLGLWLRIFISHSVISGFTSASAI  
VIGLSQIKYFLGYSI-----ARSSKIVPIVESIIAGA-----DKFQWPPFVMGSLILVILQVMKHVKGAKKE-----L  
QFLRAAAPLTGIVLGTIIAKVFH-----PPSISLVGEIPQ-GLPTFSFPRSF-----DHAKTLLPTSALITGVPILESVGI  
AKALAAK-NRYELDSNSDLFGLGVANILGSLFSAYPATGSFSRSAVNNE-SEAKTGLSGLITGIIIGCSLLFLTPMFKYIPQCALA  
AIVISAVSGLVD---YDEAIFLWRVDKRDFSLWTITSTITLFFG-IEIGVLVGVGFSLAFVIHESANPHIAVLGRLPGTTVYRNIQ  
Y-----PEAYTYNGIVIVRIDSP-IYFANISYIKDRLEYEVA  
V-----DKYTNRGLEVDVDR--INFVILEMSPVTH--IDSSAVEALKELYQ  
EYKTR---DIQLAISNP-NKDVHLTIARSGMV-ELVGKE-WFFVRVHDAVQVCLQYVQSSNLEDKHLSFTRRYGGSNNNSSSS  
NALLKEPLLSVEK-----

</seq-dat

a>

</sequence>

<column-score>



-----MSTTTTEARSPLPLLLRRGRSSTAL-----SASTAEARSPLSILQFRRRSSKDVRNI  
TSV-----SSSLLPAFGTFIEDD-----NPSSKPFIVLHFDR-RYRLWELFLVILVGYSAWASLFELAFEK  
AAEG-----ALLTIDLVDFFFAVDIILTFVSYLDN-----TTYLNVTDHKLIKRY  
LKSVAFVMDVASTLPIQFIYKTITGDVGRGQAFG-----FLNLLRLWRLRRVAELFKRLEKDAHFNFY-----  
VIRVIKLLCVTIFWIHLAGCILYWIAYHYRPTDT-----WIGSQVEDFK-----ERSV  
WLGTYTSMYWSIVTLTTVGYGDLH-----AVNSREKTFNMFYMLFNIGLTSYIIGIMTNLVVHGALRT  
FAMRSAINDILRYTSKNRPLDTMREQMLAHMQLKFKTAE---LRQEEVLQDLPKAIRSSINQHLFRSIIIEAYLFKGFPEGLLV  
QLVSQLQAEYFPPKMEIILQNEIPTDFYVIVSGVDIIASKGVSEQVLAKLPGSMAGEIGVVFNI---PQPFTVRTRRLSQQVIRI  
GHHKFKEMVQSDNDVDAKMIIANFMTYLKGLNDELKKEIPFLRDLLDDADAQVQETVQSEETPQSNDEEIVTVSRHENG  
QIEERRREGVPKRVIIHGQAPPNQDNKNNGDSNGRLIILPDSIQLLFDLAEKKGKRGSTIAMADGAHVEQIDALRENDHLY  
IF-----

-----</seq-data>

</sequence>

<sequence seq-type="Protein">

<seq-name>Q9SUU2</seq-name>

<seq-info><length>2009</length></seq-info>

<seq-data>

-----MGIEKRKKMVWFVPEKHEGGVIKEAEDVAAE  
HISREGTMSHYFSKGLLPPLGVGATARSSR-----HIKLRFCIVSPFDP-RYRAWDWFLVILVLYTAWASPFEF  
GFLQT-PRA-----PLSILDNVVNGFFAVDIVLTFVAFDK-----ATYLLVDDPKR  
IAWRYTST-WLIFDVVSTVPYELFGSLLHNTI---QGYG-----IFSMLRLWRLHRVSKCFARLEKDRKYNYF---  
---WIRCTKLLLVSFLVHCGACFCYSIAAHYPDPSMT-----FMALAEANWK-----  
--QKSLIRYVTAMYWSITTFSTTGYGDIH-----GNNAEERAFILFYMIFNLGLLAYIIGNMTNLVVHVT  
SRTRNFRDTIQAASAFARNNLPLGLQEQMVAHLSLRYRTDS-EGLQQQEIIDSLPKAIRSSISHYLFYEVVDKTYLFHGISND  
LLFQLVSEMKAIEYFPPKEDVILRNEAPSDFYIMVTGAVDIIARVNGVDQVVGAEQTGHVFGVGVLCYR---PQLFTVTRKRL  
SQLLRLNRATAFLNLVQANVGDAIIMNLLQHLKDSTDPVMKGILAETELMLAQQ-KMDLPLSLCFAAARGDLLLLHQLLK  
RGSNPNETDKNGRTALHIAASKGSQYCVVLLLEHGADPNIRDSEGSVPLWEAIIGRHEENAKLLSENGATLSFDTVGYFSC  
AVGQNNLNALKDIVKYGGDISLSDVNGTTALHRAVSEGNLEIVQFLEKGDMDKPDVYGTARALAEHQGHEDIKALFY  
NQRPVKRTILVSGTPEIKPLMKHSSEPVMTTHHSREAMPPLARAVSQ---RRKLSNFKNSLFGIMSAAKTGDEGGASTRTG  
ISEGVGGVYPARVTISGE-----ASSSGKVVKLPDS-LEELIEIGEKKLG-FVATKILSREGAEIDDIRIRDGDFLLLLKVS-----

-----</seq-data>

</sequence>

<sequence seq-type="Protein">

<seq-name>Q38998</seq-name>

<seq-info><length>2009</length></seq-info>

<seq-data>

-----MRGGALLCGQVQDEIEQLSRESSHFSL-----  
-----STGILPSLGARSNR-----RVKLRRFVSPYDH-KYRIWEAFLVVLVVYTAWVSPFEFGFLRK-PRP-----  
-----PLSITDNIVNAFFAIDIIMTFFVGYLDK-----STYLIVDDRKQIAFKYLRW-WFLLD  
LVSTIPSEAAMRISS-----QSYG-----LFNMLRLWRLRRVGFALFARLEKDRNFNYF-----WVRCAKLVCVT  
LFAVHCAACFYLIAARNSNPAKT-----WIGANVANFL-----EESLWMRYVTSM  
YWSITTLTTVGYGDLH-----PVNTKEMIFDIFYMLFNLGLTAYLIGNMTNLVHGTSTRTRNFRDTIQA  
ASNFAHRNHLPPRLQDQMLAHLCLKYRTDS-EGLQQQETLDALPKAIRSSISHFLFYSLMDKVVYFRGVSNDLLFQLVSEMK  
AEYFPPKEDVILQNEAPTDYFYLVTADLVVDVTGTESIVREVKAGDIIGEIGVLCYR---PQLFTVRTKRLCQLLRMNRTTFL  
NIIQANVGDGTIIMNLLQHLKEMNDPVMNTNVLLEIENMLARG-KMDLPLNLCFAAIREDDLLHQLLKRGLDPNESDNN  
GRTPLHIAASKGTLNCVLLLEYHADPNCRDAEGSVPLWEAMVEGHEKVVKVLLEHGSTIDAGDVGHFACTAAEQGNLKL  
LKEIVLHGGDVTRPRATGTSALHTAVCEENIEMVKYLLEQGADVKNQDMHGWTPRDLAEQQGHEDIKALFREKLHERRV  
HIETSSVPILKTGIRFLGRFTSEPNIRPASREVSFRIRETRARRKTNNFDNSLFGILANQSVPKNGLATVDEGRTGN-----PVR  
VTISCAEK-----DDIAGKLVLLPGSFKELL-ELGSNKFIVATKVMNKNDAEIDDVDVIRGDHILIFATDS-----  
-----</seq-data>

</sequence>

<sequence seq-type="Protein">

<seq-name>Q38898</seq-name>

<seq-info><length>2009</length></seq-info>

<seq-data>

-----MDLKYSASHCNLSSDMKLRRFHQHRGKGREE  
EYDASSLSLNNLSKLILPPLGVASYNQN-----HIRSSGWIISPMDS-RYRCWEFYMVLLVAYSAAWVYPFEVA  
FLNSSPKR-----NLCIADNIVDLFFAVDIVLTFVAYIDE-----RTQLLVREPKQIA  
VRYLST-WFLMDVASTIPFDAIGYLITGTSTLNITCN-----LLGLLRFWRLLRRVKHLFTRLEKDIRYSYF-----  
WIRCFRLLSVTLFLVHCAGCSYLIADRYPHQGKT-----WTDA-IPNFT-----ETSL  
SIRYIAAIYWSITTMVVGYGDLH-----ASNTIEMVFITVYMLFNLGLTAYLIGNMTNLVVEGTRRTM  
EFRNSIEAASNFNVRNRLPPRLKQILAYMCLRFKAES---LNQQHLIDQLPKSIYKSIQHLFLPSVEKVVYLFKGVSRREILLLV  
KMKAIEYIPREDVIMQNEAPDDVYIIVSGEVEIIDSEMERESVLGTLRCGDIFGEVGLCCR---PQSYTFQTKSLSQLLRKTS  
FLIETMQIKQQDNATMLKNFLQHHKLSNLDIGDLKAQQNGENTDVVPPNIASNLIAVVTTGNAALLDELLKAKLSPDITDS  
KGKTPLHVAASRGYEDCVLVLKHGCNIHIRDVNGNSALWEAIIKHYEIFRILYHFAAISDPHIAGDLLCEAAKQNNVEVMK  
ALLKQGLNVDTEHHGVTALQVAMAEDQMDMVNLLATNGADV-----CVNTHNEFTPLEKLRVVEEEEEEEERG-----  
-----RVSIRGHPLERRERSNEAGKLLILPPSLDDLKKIAGE

KFGFDGSETMVTNEDGAEIDSIEVIRDNDKLYFVVKII-----  
-----</seq-data>  
</sequence>  
<sequence seq-type="Protein">  
<seq-name>O24538</seq-name>  
<seq-info><length>2009</length></seq-info>  
<seq-data>-----

-----MENNFGSLNRKHHHTSSSSFNLRNV-----  
-----SKLILPPLGVSRE-----NQVYSRWIISPMDS-RYRCWESFMVVLIAYSAWAYPFEVAFMHSSPNR--  
-----KLYIVDNIIDLFFAIDIVMTFFLAFIDG-----TTHLLVRDSKKIVVRYLST-WFI  
MDVASTIPYEAIGFILTGKHKLGLPYF-----LLGMLRFWRIRRVKQFFTRLEKDIRFSYF-----WVRCARLLS  
VTLFSIHCAGCLYMLADRYPHQGNT-----WIGAVIPNFR-----ETSPRTRYISAI  
YWSITTMTTVGYGDLH-----AVNTMEMIFIIFYMLFNLGLTAYLIGNMTNLVVEGTRRTMEFRNSIE  
AASNFCRNRLPPRLREQILAYMCLRFAER---LNQHQLIEQLPKSICKSICQHLFFPTVEKVYLFKGVSKILLSLVAKICAEYI  
PPKEDVIMQNEAAEDVYIIVSGEVEIIDSVIEKERVGLTGTGDMFGEVGLCCR---SQSYTYRKTTLTQLRLKGTALIEAMQ  
IKKEDNILILKNFLQHYKQLKDSLKDLIVENVEEEDPN---MAVNLLTVAGTGNAAFVEELLRAGLDPDIGDSKGKTPHIAA  
SNGHEECVKVLLKHTCNIIHKDMNGNTALWYAIASKHYSIFRILYQLSALSPTYAGNLLCLAAKRNLDLTMNELLKQGLNI  
DSKDGHGMPKIPIAMTENLDMVQLVMNGASVLDMHIPEFSASTLNELLQKREIGHLINVNEEMPSEFVLKGENQEDQ  
KQVWKRKNGVEFPRVSIYRGHPVIRREKGFIEAGKLIKLPDSLEKLIAGEKFEFDARDAMVTNEEGAEIDSIDVIRDNDKLY  
IVE-----  
-----</seq-data>

</sequence>  
<sequence seq-type="Protein">  
<seq-name>Q9SM12</seq-name>  
<seq-info><length>2009</length></seq-info>  
<seq-data>-----

-----MKKNSSSIESTGGGVGGSGGTVSGSGSGSF---  
-----NLRNLSKVILPPLGGPSGGQSQS-----HGGSDKWVVSPLDS-RYRWWDTFMVVLVAYS AWVYPFEVA  
FMNASPKG-----GLEVADIVVDLFFAVDIVLTFVAYIDG-----RTQLLVRDRK  
KITLRYLST-FFIMDVASTIPFQGLAYLITGEVRENAVYS-----MLGVLRLWRLRRVKQFFTRLEKDIRFSYF---  
-----WIRSARLVAVTLFLVHCAGCLYLIADRYPDRQKT-----WIGAVIPNFR-----  
QASLRIRYISSIYWSITTMTTVGYGDLH-----AQNNVEMIFNIFYMLFNLGLTAYLIGNMTNLVVEGT  
RRTMEFRNSIRAASSFVGRNHLPPRLKQQLAYMCLKFRAES---LNQQQLMDQLPKSICKSICEHLFPVVKDVYLFVGRVSR  
EMLLSLVTKMKPEYIPPKEDVIVQNEAPDDVYVVVSGEVEVILFDGIYEQVQATLGARDIFGEVSALSDR---AQAFTRTRTL

SQLRLKQATLKEAMQSRPESVVIKFLKHQVEMHGMKVEDLLGDNTGEHDD-----DAIVLTVAAAMGNSGLLEDLLR  
AGKAADVGDAGKRTALHIAASKGYEDCVLVLLKHACNVNIRDAQGNTAMWNAIAAGHHKIFNLLYQFGRASNPRAGGD  
VMCLAARRGHLGALQELLKLGLDVDSHDGATALRVAMAEGHADAARFLILNGASVDK-----ASLDDDGSGSGSGSG  
AARLAMSPTELRELLQKRELGHSTITHDSPA VVPNGGSSGHSRPGRLQSTSSDSQRWP-----RV  
SVYKGHPFLRNR--TSEAGKLINLPGTMEEFKVIVGEKLVDAEKALIVSDEGAEIDSIDVIRDNDKLFMVTEEDLRRLASMD  
WLSC-----</seq-data>

</sequence>

<sequence seq-type="Protein">

<seq-name>Q9XH40</seq-name>

<seq-info><length>2009</length></seq-info>

<seq-data>-----

-----MEKKDSGSSLKNENEEKKEKDLEEKPHL-EEDY  
ESPTFNLQNVSKVILPPLGASTYNDNRSS-----PHHPKTWIISPLDT-RYRCWESLMVVLVGYSAWVYPFEIGF  
LMSSPTH-----KLYIVDNIIDIFFGVDIVLTFFLAYIDS----STQLLVQDSKQIAL  
RYLST-WFVMDVASSIPYEALGYLFTGKHKVGLTFF-----LLGMLRLWRLRRVKQYFTRLEKDIRFSYF-----  
-LIRCVRLLCVTFIAHCGGCLYLLADVPHLGRT-----WIGTTNPSFK-----GTSI  
GIRYISAMYWSLTTMTTVGYGDFH-----AVNPMEMAFTICYMFFNLGLTAYLIGNMTNLVVQGTC  
RTMEFRNNIEAATNFVSRNIVSARLKEQIIAYMCLRYKAES---LNHHQLMEQLPKSIRKNICQHFLPAVQKVYLFKGLSREIL  
LSLAAKMKAEYIPPKEEVIMQGDAAEDVYIIVSGEVEIIGFAMDKERVLGILQRWDMFGEV GALCCK---PQSFTYRTKTLTQ  
LLRLRTSDFTDTMQTKKDDNMQMLKNFLQHLKHLNLDKDLVIDWSRED---DPSMAVNLLHVASTGNSALLEELLKAG  
LDSSVADSKGKTPLHIAALNGHEECVKVLLKHACNVHARDMNGDTALWDAIFSKHYSIFRILYQLCVQSDPHTAGDLLCKA  
AKRNELTVMSELLKQGLNIESKDHHGCTAMQVAWQHNVHVDMIQLLFMNGSDVVG-----ALNYDNNNNNQEERGQ  
HNSIWGTYNNNNNSNNHRHIAS-----RVSIFRGHPILRRQQGCI  
EAGKMIRFPNSIKELKTIAGERFGF DAKDAMVTDEGGAEIDSIDLIRDNDKLFIVE-----

-----</seq-data>

</sequence>

<sequence seq-type="Protein">

<seq-name>O54852</seq-name>

<seq-info><length>2009</length></seq-info>

<seq-data>-----

-----MPV---RRGHVAPQNTFLGTIIRKFEGQ-NKKFIANARV-QNCAIYCNDGFCEMTGFSRPDVMQKPCTCDFLHGPETK  
--RHDIAQIAQALLGSEERKVEVYYHKN-----STFICNTHIIPVKNQEGVAMMFIINFEYVTEDENAASPERVNP  
ILPVKSVNRKLFGFKFPLRVLTYRKQSLPQED-----PDVVVIDSSKHSDDSVAMKHFKSPTKESCSPSEADDTKALIQPS  
QCSPLVNI SGPLDHSSPKRQWDRLYPDMLQSSSQLTHSRRESLCSIRRASSVHDIEGFNVHPKNIFRDRHASEDNGRNVK  
GPFNHKSSLLGSTSDSNLNKYSTINKIPQLTLNFSVDKTEKNTSPPSSDKTIIAPVKERTHNVTQVLSLADVLPEYK  
LQ-----TPRINKFTILHYSF-FKAVWDWLILLVIYTAIFTPYSA AFLNDREE-QKRRECGYSCS-----

-----PLNVVDLIVDIMFIIDILINFRTTYVNQ-----NEEVSDPAKIAVHYFKG-WFLIDMVAaipfdllifgsg  
SDE---TTT-----LIGLLKTARLLRLVRVARKLDryseyga-----AVLMLLMCIFALIAHWLACIwyaIGN  
VERP---YLTDKI-GWLDslgtQIGKRYNDSdSS-----SGPSIKDKYVTALYFTfSSLTSVGFG  
NVS-----PNTNSEKIFSICVMLIGSLMYASIFGNVSAIIQRLYSGTARYHMqMLRVKEFIRFHQIPNPL  
RQRLEEFQHAwTYTN-G-IDMNMVlkgfPECLQADICLHLNQTLLQNCKAFRGASKGCLRALAMKFKTTHAPPGDTLVH  
CGDVLtALYFLSRGSIEILK---DDIVVAILGKNDIFGEMVHLYAK-----PGKSNADVRALTYCDLHKIQREDLLEVLDmYP  
EFSDHFLTN--LELTFNLRHESAksQSIN--DSEGDTCKLRRRRLSFESEGDkDFSKEsANDADDSTDTIRRYQSSKKhFEeKK  
SRSSSFISSIDDEQKPLFLGTVDSTPRMVKASRHHGEEAAPPsGRIHTDKRSHSCKDITDTHSWEREHARAQPEECSPSGLQ  
RAAWGISETESDLTYGEVEQRDLLQEQLNRLESQMTTDIQAiLQLLQKQTTVVPPAYSMVtAGAEYQRPILRLLRTSHPRa  
SIKtDRSFSPSSQCPEFLDLEKSKLKSKEsLSSGKRLNTASEDNLTsLLKQDSDASSELDPRQRKSYLHPiRHPSLPDSSSLSTVGI  
GLHRHVSDPGLPGK-----

-----</seq-data>

</sequence>

<sequence seq-type="Protein">

<seq-name>O54853</seq-name>

<seq-info><length>2009</length></seq-info>

<seq-data>-----

-----MPV---RRGHVAPQNTYLDTIIRKfEGQ-SRKFLIANAQM-ENCAIiYcNDGfCElFGYSRVEVMQRpCTCDfLTGPNTp  
--SSAVSRLAQALLGAEECKVDILYRkDA-----SSFRCLVDVVPVKNEDGAVIMFILNFEDLAQL-----

-----L  
AKSSSRSLTQRLLSHSFLGSEGSHSRPSGQGPGPGRGKYRTVSQIPQFTLNfVEFNLEKHRSGSTTEIEIIAPHKVVERTQNVt  
EKVTQVLSLGADVLPEYKLQ-----APRIHRGTILHYSP-FKAVWDWLILLlVIYtAVFTPYSAAFLLSDQDESQR-  
GTCGYTCS-----PLTVVDLIVDIMFVVDIVINFRTTYVNT-----NDEVVSHPRRIAVHYFK  
G-WFLIDMVAaipfdllifRTGSDE---TTT-----LIGLLKTARLLRLVRVARKLDryseyga-----AVLFLL  
MCTFALIAHWLACIwyaIGNVERP---YLEPKI-GWLDslGAQLGKQY-----NGSDPASGP  
SVQDKYVTALYFTfSSLTSVGFGNVS-----PNTNSEKVFISICVMLIGSLMYASIFGNVSAIIQRLYSGTA  
RYHTQMLRVKEFIRFHQIPNPLRQRLEEFQHAWSYTN-G-IDMNAVlkgfPECLQADICLHLHRALLQHCPAFRGASKGC  
LRALAVKFKTTHAPPGDTLVHlGDVLSTLYFISRGsIEILR---DDVVVAILGKNDIFGEPASLHAR-----PGKSSADVRAlt  
YCDLHKIHRADLLEVLDmYPAFADTFWnk--LEVTFNLRDADGGLQSTPRQAPGHQDPQGFFLNDsQSGAAPSLSISDTSa  
LWPELLQQMPPSPPNRQDLDCWHRELGFKLEQLQAQMNRLESRVSSDLsRILQLLQHPQGRPSYILGASASSDLASFPET  
SVTRsSESTLLVGHVPSAQTLsYGDLDdHIQTPRNfSPRTPHVAMAMDKTLVPSSEQEQPGLLSPLASPLRPLEVPGLGGS  
RFPsLPEHLSSVPKQLEFQRHGSDPGFTRS-----

-----</seq-data>

</sequence>

<sequence seq-type="Protein">

<seq-name>O19119</seq-name>

<seq-info><length>2009</length></seq-info>

<seq-data>-----



-----MPV---RRGHVAPQNTFLDTIIRKFEGQ-SRKFIANARV-ENCAVIYCNDGFCELCGYSRAEVMQRPCTCDFLL-----  
-----GAEERKVEIAFYRKDG-----SCFLCLVDVVPVKNE DGAVIMFILNFEVVM EKDMV GSPARDTNHRGPPTS  
WLAPGRAKTFRLKLPALLALTARESSVRPGGAGGAGAPGAVVVDVLTAPAAPSSSESLALDEVPAMD NHVAGLGPAEERR  
ALVGSCSPPPVVSAPGPHPSLRAHSLNPDASGSSCSLARTRSRESCASVRRASSADDIE-----AMRAGALPPPPRHASTGA  
MHPLRSGLLNSTSDSDLVRYRTISKIPQITLNFVDLKGDPFLASP-TSDREIIAPKIKERTHNVTEKVTQVLSLGADVLPEYKLG-  
-----APRIHRWTLHYSP-FKAVWDWLILLVIYTAVFTPYSAAFLLKETEEGPPAPECGYACQ-----  
-----PLAVVDLIVDIMFIVDILINFRTTYVNA-----NEEVVSHPGRIAVHYFKG-WFLIDMVAAIPFDLLIFGSG  
SEE-----LIGLLKTARLLRLVRVARKLDRYSEYGA-----AVLLLLMCTFALIAHWLACIWIYAIGNME  
QP---HMDSRI-GWLHNLGDQM GKPYNSSGL-----GGPSIKDKYVTGLYFTFSSLTSVGF  
GNVS-----PNTNSEKIFSICVMLIGSLMYASIFGNVSAIIQRLYSGTARYHTQMLRVREFIRFHQIPNPL  
RQRLEEFQHAWSYTN-G-IDMNAVLKGFPECLQADICLHLNRSLLQHCKPFRGATKDCLRALAMKFKTTHAPPGDTLVHA  
GDLLTALYFISRGSIEILR---GDVVVAILGKNDIFGEPLNLYAR-----PGKSN GDVRALTYCDLHKIHRDDLLEVLDMYPEF  
SDHFWSS--LEITFNL RDTNMIPGSPGSTEWE GGFNRQRKRKLSFRRRTDKDTEQPGEVSALGPGRAGAGPSSRGRPGGP  
WGESPPSSGPSSPESEDEGPRSSSPLRLVPFSSPRPPGEPGGEPLTEDCEKSSDTCNPLSGAFSGVSNIFSWGDSRGRQ  
YQELPRCPAPAPSLNIP LSSPSRRPRGDVESRLDALQRQLNRLETRLSADMATVLQQLQRQMTLVP PAYS AVTTPGPGPTS  
TSPLLPVSPFPTLTDLSLSQVSQFMACEELPPGAPELPQEGPTRRLSLPGQLGALTSQPLHRHGSDPGS-----  
-----

-----</seq-data>

</sequence>

<sequence seq-type="Protein">

<seq-name>O88877</seq-name>

<seq-info><length>2009</length></seq-info>

<seq-data>-----  
-----  
-----

-----MPV---MKGLLAPQNTFLDTIATRFDGT-HSNFILANAQVAKGFPIVYCS DGFCELAGFARTEVMQKSCSCKFLFGVETN  
--EQLMLQIEKSLEEKVEFKGEIMFYKKN G-----APFWCLLDIVPIKNEKGDVVLFLASF KDITDT-----  
-----

-----KVKITSEDKKED---RAKGRSRA-GSHFDSARRRSRAVLYHISGHLQRREKNKLKINNNVFVDKPA  
FPEYKVS-----DAKKS FILLHFST-FKAGWDWLILLATFYVA VTPY NVCFIGNEDL-STTR-----  
-----STTVSDIAVEILFIIDIILNFRTTYVSK-----SGQVIFEARSICIHVYTT-WFIIDLIAALPFDLLYAFNVT  
VVS-----LVHLLKTVRLLRLLRLLQKLD RYSQHST-----IVLTLLMSMFALLAHWMACIWIYVIGKM  
EREDNSLLKWEV-GWLHEL GKRL ESPYYGNNT-----LGGPSIRSAYIAALYFTLSSLTSVGF  
GNVS-----ANTDAEKIFSICTMLIGALMHALVFGNVT AIIQRMYSRWSLYHTRTKDLKDFIRVHHL PQ  
QLKQRMLEYFQTTWSVNN-G-IDSNELLKDFPDELRS DITMHLNKEILQ-LSLFECASRGCLRSLSLHIKTSFCAPGEYLLRQG  
DALQAIYFVCSGSMEVLK---DSMVLAILGKGD LIGANLSIKDQ-----VIKTNA DVKALTYCDLQCIILKGLFEVLGLYPEYA  
HKFVEDIQHDLTYNLREGH-ESDVISRLSNKSTVPQAEPKGN GSIKKRLPSIVEDEEEEEVEEEEETSLSPIYTRGSSVSHSKT  
GSSKSYLGLSLKQLTSGTVPFHSPIRVSSANS PKTKQEADPPNHGTRKEKNLKVQLCSLGTAGTPELSPRIVDGI EDGNSSEET  
QTFDFGSEQIRPEPRISPSLGESEIGAAFLFIKAEETKQQINKLNSEVTTLTQEVSQ LGKDMRSIMQLLENILSPQQPSQFCSL  
HPTSICPSRESFQTRVSWSAHQ PCLHLQANGAHL YHGNVTSDIWSVDPSLVGSNPQRTEAHEQSPVDS ELHHSPLNLA YSP  
SHCQVIQEGHLQFLRCISPHSDTTLTPLQSI SATLSSSVCSSETS LHLVLP SRSEEGSITHGPVSSFSLENLP GSWDREGMMS

ASTEPLENFPVEVVTSTADVKDSKAINV-----</seq-data>

</sequence>

<sequence seq-type="Protein">

<seq-name>Q9UQ05</seq-name>

<seq-info><length>2009</length></seq-info>

<seq-data>-----

-----MPV---MKGLLAPQNTFLDTIATRFDGT-HSNFLLANAQGRGFPIVYCSDFCELTGYGRTEVMQKTCSCRFLYGPETS  
--EPALQRLHKALEGHQEHRAEICFYRKDG-----SAFWCLLDMMPIKNEMGEVVLFLFSFKDITQS-----

-----GSPGLGPQGGRGDSNHENSLGRRGATWKFRSARRRSRTVLHRLTGHFGRRGQGGMKAN  
NNVFEPKPSVPEYKVA-----SVGGSRCLLHYSV-SKAIWDGLILLATFYVAVTVPYNVCFSGDDDTPITSR-----  
-----HTLVSDIAVEMLFILDIIILNFRTTYVSQ-----SGQVISAPRSIGLHYLAT-WFFIDLIA  
ALPFDLLYIFNITVTS-----LVHLLKTVRLLRLLRLLQKLERYSQCSA-----VVLTLMSVFALLAHW  
MACIWWYVIGRREMEANDPLLWDI-GWLHELKGRLEVPYVNGSV-----GGPSRRSAYIAA  
LYFTLSSLTSVGFGNVC-----ANTDAEKIFSICTMLIGALMHAVVFGNVTAIQRMYSRRSLYHSRMK  
DLKDFIRVHRLPRPLKQRMLEYFQTTWAVNS-G-IDANELLRDFPDELRIAMHLNREILQ-LPLFGAASRGCLRALS  
SFCAPGEYLLRRGDALQAHYYVCSGSLEVL----DNMVLAILGKGDIGADIPEPGQEPGLGADPNFVLKTSADV  
KALTYCG  
LQQLSSRGLAEVLRLYPEYGAAFRAGLPRDLTFNLRQGS DTSGLSRFSRSPRLSQPRSELSGSSDKTLP  
SITEAESGAEPGGG  
PRRRRPLLLPNLSPARPRGSLVSLGEEPPFSALVSSPSLSPALAGQGHSASPHGPPRCSAAWKPPQLLIP  
PLGTFGPP  
DLSPRIVDGIEDSGSTAEAPSFRRSRRPELPRPRS QAPPTGTRPSPELASEAEVKEKVCRLNQEISRLN  
QEVSQLSREL RHIM  
GLLQARLGPPGHPAGSAWTPDPPCPQLRPPCLSPCASRPPPSLQD TTLAEVHCPASVGTMETGTALLD  
LRPSILPPYPSEPD  
PLGPSPVPEASPPTPSLLRHSFQSRSDTFH-----

</seq-data>

</sequence>

<sequence seq-type="Protein">

<seq-name>Q9UQ06</seq-name>

<seq-info><length>2009</length></seq-info>

<seq-data>-----

-----MPA---MRGLLAPQNTFLDTIATRFDGT-HSNFVLGNAQVAGLFPVVYCSDFCDLTGFSRAEVMQ  
RGCACSFYGPDT  
TS--ELVRQQIRKALDEHKEFKAEILYRKSG-----LPFWCLLDVIPIKNEKGEVALFLVSHKDISET-----

-----KNRGGPDRWKETGGGRRRYGRARSKG--FNANRRRSRAVLYHLSGHLQKQPKGKHKLNKGVF  
GEKPNLPEYKVA-----AIRKSPFILLHCGA-LRATWDGFILLATLYVAVTVPYVVCVSTARE-PSAARG-----  
-----PPSVCDLAVEVLFILDIVLNFR TTFVSK-----SGQVVFAPKSICLHYVTT-WFLLDVIAALP  
FDLLHAFKVN VYF-----GAHLLKTVRLLRLLRLLPRLDRYSQYSA-----VVLTLMAV FALLAHWVA  
CVWIFYIGQREI ESSESELPEI-GWLQELARRLETPYYLVGRRPAGGNSSGQS-----DNCSSS---SEANGT  
GLELLGGPSL  
RSAYITSLYFALSSLTSVGFGNVS-----ANTDTEKIFSICTMLIGALMHAVVFGNVTAIQRM  
YARRFLY  
HSRTRDLRDIYIRIHRIPKPLKQRMLEYFQATWAVNN-G-IDTTELLQSLPDELRIAMHLHKEVLQ-LPLFEA  
ASRGCLRALS

LALRPAFCTPGEYLIHQGDALQALYFVCSGSMEVLK---GGTVLAILGKGDIGCELPREQ-----VVKANADVKGITYCV  
LQCLQLAGLHDSLALYPEFAPRFRSRLRGELSYNLGAGGSAEVDTSLSGDNTLMSTLEEKETDGEQGPVSPAPADEPSS  
PLSPGCTSSSSAAKLLSPRRTAPRRLGGRGRPRGAGALKAEAGPSAPPRALEGLRLPPMPWNVPPDLSRPRVVDGIEDGC  
GSDQPKFSFRVQSGPECSSSPGPESGLLTVPHGPSEARNTDLDKLRQAVTELSEQLQMREGLQSLRQAVQLVLAPH  
REGPCPRASGEGPCPASTSGLLQPLCVDTGASSYCLQPPAGSVLSGTWPHPRPG-PPPLMAPWPWGPPASQSSPWPRAT  
AFWTSTSDSEPPASGDLCEPSTPAPPPPSEEGARTGPAEPVSAEATSTGEPGSGGLALPWDPHSLEMVLIGCHGSGT  
VQWTQEEGTGV-----</seq-data>

</sequence>

<sequence seq-type="Protein">

<seq-name>O89047</seq-name>

<seq-info><length>2009</length></seq-info>

<seq-data>-----  
-----  
-----

----MPA---MRGLLAPQNTFLDTIATRFDGT-HSNFVLGNAQVAGLFPVVCSDGFCDLTGFSRAEVMQRGCACSFYGPD  
TS--ELVRQQIRKALDEHKEFKAEILYRKSG-----LPFWCLLDVPIKNEKGEVALFLVSHKDISET-----  
-----

-----KNRGGPDNWKERGGRRRYGRAGSKG--FNANRRRSRAVLYHLSGHLQKQPKGKHKLNKGV  
FGEKPNLPEYKVA-----AIRKSPFILLHCGA-LRATWDGFILLATLYVAVTVPYSVCVSTARE-PSAARG-----  
-----PPSVCDLAVEVLFILDIVLNFRTTFVSK-----SGQVVFAPKSICLHYVTT-WFLLDVIAALP  
FDLLHAFKVNYYV-----GAHLLKTVRLLRLLRLLPRLDRYSQYSA-----VVLTLMAVFALLAHWV  
ACVWFYIGQQEINSESELPEI-GWLQELARRLETPYYLVSRSPPDGGNSSGQS-----ENCSSSGGSEANGTGLELLGG  
PSLR SAYITSLYFALSSLSVGFNVN-----ANTDTEKIFSICTMLIGALMHAVVFGNVTAIQRM YARR  
FLYHSRTRDLRDIYIRIHRIPKPKQRMLEYFQATWAVNN-G-IDTTELLQSLPDEL RADIAMHLHKEVLQ-LPLFEAASRGCLR  
ALSLALRPAFCTPGEYLIHQGDALQALYFVCSGSMEVLK---GGTVLAILGKGDIGCELPREQ-----VVKANADVKGITYC  
YCVLQCLQLAGLHESLALYPEFAPRFRSRLRGELSYNLGAGGSAEVDTSLSGDNTLMSTLEEKETDGEQGH TISPAPADE  
PSSPLSPGCTSSSSAAKLLSPRRTAPRRLGGRGRPSRAGVLKPEAGPSAHPRTL DGLQLPPMPWNVPPDLSRPRVVDGIE  
DGCSDQHKFSFRVQSGPECSSSPGTESGLLTVPLVPSEARNTDLDKLRQAVTELSEQLQMREGLQSLRQAVQLIL  
VPQGEQQCPRVSGEGPCPATASGLLQPLRVDTGASSYCLQPPAGSVLSGTWPHPRPGHPPPLMAPWPWGPPASQSSP  
WPRATALWTSTSDSEPPGSGDLCEPSTPAPPPPPEEGARTGTPAPVSAEATSTGEPGSGGRALPWDPHSLEMVLIG  
CHGPGSVQWTQEEGTGV-----</seq-data>

<seq-data>

</sequence>

<sequence seq-type="Protein">

<seq-name>CIKE\_DROME</seq-name>

<seq-info><length>2009</length></seq-info>

<seq-data>-----  
-----  
-----

----MP--GRRGLVAPQNTFLENIIRRSNSQPDSFLLANAQIVD-FPIVYCNEFCKISGYNRAEVMQKSCRYVCGFMYGEL  
TDKETVGRLEYTLENQQDQFEILLYKNNLQCGCALSQFGKAQTQETPLWLLLQVAPIRNERDLVVLFLLTFRDITAL-----  
-----

-----KQPIDSEDTKGVLG----LSKFAK---LARSVTRSRQ--FSAHLPTLKDPTKQSNLAHM  
MSLSADIMPQYRQE-----APKTPPHILLHYCA-FKAIWDWVILCLTFYTAIMVPYNVAFKNKTSADV-----  
-----SLLVVDIVDVIFIDIVLNFHTTFVGP-----GGEVVS DPKVIRMNYLKS-WFIIDL LSC  
LPYDVFNAFDRDEDGIGS-----LFSALKVVRLRLGRVVRKLD RYLEYGA-----AMLILL LCFYMLVAH  
WLACIWYSIGRSDADNGIQY----SWLWKL ANVTQSPYSIW-----SNDTGP ELVNGPSRKS MY  
VTALYFTMTCMTSVGFGNVA-----AETDNEKVFTICMMIIAALLYATIFGHVTTIIQQM TSATAKYH  
DMLNNVREFMKLHEVPKALSERVMDYVVSTWAMTK-G-LDTEKVLNCCPKDMKADICVHLNRKVFDEHPTFRLASDGCL  
RALAMHFMMSHSAPGDLLYHTGESIDSLCFIVTGSLEVIQ----DDEVVAILGKGDVFGDQFWKDSA-----VGQSAANV  
RALTYCDLHAIKRDKLLEVLDFYSAFANSFARN--LVLTYNLRHRLIFRRVADV KREKELAEERRKNEPQLPQNQDHLVRKIFSK  
FR RTPQVQAGSKELVGGSGQSDVEKGDGEVERTKVL PKAPKLQASQATLARQDTIDEGGEVDSSPPSRDSRVVIEGA AVS  
SATVGPSPPVATTSSAAAGAGVSGGPGSGGTVVAIVTKADRNLALERERQIEMASSRATTSDTYDTGLRETPPTLAQRDLV  
ATVLDMKVDVRELRMQRIGRIEDLLGELVKRLAPGASSGGNAPDNSSGQTTPGDEICAGCGAGGGGTPTTQAPPTS  
AVTSPVDTVITISSPGASGSGSGTGAGAGSAVAGAGGAGLLDPGATVVSSAGGNLGPLMLKRRRSKSGKAPAPPEQTLA  
STAGTATAAPAGVAGSGMTSSAPASADQQQQHQSAADQSPTTPGAELLHLR LLEEDFTAAQLPSTSSGGAGGGGGSGS  
GATPTTTPPTIAGGSGSGTPTSTATTPTGSGTATRGLDFL</seq-data>

</sequence>

<sequence seq-type="Protein">

<seq-name>O44164</seq-name>

<seq-info><length>2009</length></seq-info>

<seq-data>

-----MPV--GKRGLVAPQNTFLENVIRRCNNA-DTSFILANAQVVD-YPIVYCNDGFSKLVGYTRAEIMQKPCSLAFMHGEH  
GE--VGS LQMQEALENARTEQAEIGLCKKNK-----TPIWLLVHLAPIKNHKDAVVLYLCQFKDITPL-----

-----KQPLDDENKALF-----CVTGKANAVEEVTRVVMNLGGDMLPQYR  
QE-----TPKTPHILHYSS-FKTIWDWSILALTFYAFMVPFNIAFKNSSRENPGGGID-----  
-----SVALMDSIVDVIFADILLNFHTTFVGP-----GGEVVI EPSVIRQNYFKS-WFLIDL LLSCLPYDIFYMFKRD  
DERIGS-----LFSALKVVRLRLGRVARKLDNYLEYGA-----ATLLLLL CAYVIVAHWLACVWFWIGD  
SEVRLKMDNLALPDGWLWKL S NDLRQHYNIPLSNKTTL-----VGGPSRTSAYISSLYYTMSCM  
STVGFGNIA-----SNTDNEKIFGVCMMIISALLYAAIFGHMTTIIQQM TSSTVRYHEMISNVREFIKLQ  
EIPKELAE RVM DYVVSTWAMTK-G-IDTAKVLGYCPKDMKADICVHLNRKVFNEHSCFRLASDGCLRSLAMFLELNHAAPG  
D LLYHTGESVDALWFVVS GSLEVIQ----DDEVVAILGKGDVFGDEFWKANGS-----TGQSAANVRALTYSDLHMIKKDK  
LMDVLDFYKAFANSFARN--MTLTYNLTHRMKFRKVADV KREKELDAKRKNEK-LTLPNDHPIRKLLFRMRERHGPRIFPSP  
MFADIEKGLKKSTEISRISLHSMIDETGGGGSSYVKSPRSKPKRPPLMKRQTVDEDALSRTSWGMDKKDREWSSLSNIKTE  
MKSKFDIIGERLTII EQINSRLALLERVLIGNNGGANTPSTMPVGSFSALNESGNRLTLDAAPVARSVSWSEQHQPHWQRF  
VEIYSETSTVPPLRELEAGEWEPPIREPTPNPSTSSSRVPHIQIDEDGEARPPTRTRI-----

</seq-data>

</sequence>

<sequence seq-type="Protein">

<seq-name>O95259</seq-name>

<seq-info><length>2009</length></seq-info>

<seq-data>

-----MTMAGGRRGLVAPQNTFLENIVRRSN---DTNFVLGNAQIVD-WPIVYSNDGFCKLSGYHRAEVMQKSSTCSFMYGE  
LTD--KDTIEKVRQTFENYEMNSFEILMYKKNR-----TPVWFFVKIAPIRNEQDKVVLFCTFSDITAF-----

-----KQPIEDDSCKGWG-----KFARLTRALTSSRGLVQQLAPSVQKGENVHKHSRLAEVLQLG  
SDILPQYKQE-----APKTPPHILHYCV-FKTTWDWIILITFYTAILVPYNVSFKTRQNNV-----

-----AWLVVDSIVDVIFLVDIVLNFHTTFVGP-----AGEVISDPKLIRMNYLKT-WFVIDLLSCLPYDVIN  
AFENVDEVSFAFMGDPGKIGFADQIPPLEGRE-SQGISSLFSSLKVVRLRLGRVARKLDHYIEYGA-----AVLVLLVCVFG

LAAHWMACIWYSIGDYEIFDEDTKIRNNSWLYQLAMDIGTPYQFNGSGSGKW-----EGGP  
SKNSVYISSLYFTMTSLTSVGFGNIA-----PSTDIEKIFAVAIMMIGSLLYATIFGNVTTIFQQMYANTN

RYHEMLNSVRDFLKLYQVPKGLSERVMDYIVSTWSMSR-G-IDTEKVLQICPKDMRADICVHLNRKVFKEHPAFRLASDGC  
LRALAMEFQTVHCAPGDLIYHAGESVDSLFCVVSGSLEVIQ---DDEVVAILGKGDVFGDVFWEAT-----LAQSCANV

RALTYCDLHVIKRDALQKVLEFYTAFSHSFSRN--LILTYNLRKRIVFRKISDVKREEEERMKRKNEAPLILPPDHPVRRFLQFRF  
QQKEARLAAERGGRDLDLDVEKGNVLTEHASANHSLVKASVTVRESPATPVSFQAASTSGVDPDHAKLQAPGSECLGPK

GGGGDCAKRKSWARFKDACGKSEDWNKVSKAESMETLPERTKASGEATLKKTDSCDSGITKSDLRLDNVGEARSPQDRS  
PILAEVKHSFYPIPEQTLQATVLEVRHELKEDIKALNAKMTNIEKQLSEILRILTSRRSSQSPQELFEISRPQSPESERDIFGAS---

</seq-data>

</sequence>

<sequence seq-type="Protein">

<seq-name>CNG\_ICTPU</seq-name>

<seq-info><length>2009</length></seq-info>

<seq-data>

-----MTGQAALERSVSSHRLSVRSRLEGEAERAESAISRDTGDDDTCESELQRVTALELPSAEMLEAFTQRR  
PLARLVNLVLSLREWAHKSLEVETEQRPDSEFLERFRGPQAANDQSAAPADAPKKT-----KERWEGFVVSQSD

D-IYYYYWFFIALASLYNWIMLVARACFDQLQDEN-----FFLWVGLDYLCDVIYI  
LDTCIRLRTGYLE-----QGLLVKDLAKLRDNYIRTLQFKLDFLSILPTELLFFVTG-----YVPQLRFNR

LLRFSRMFEFFDRTETRTNYP-----NAFRICNLILYLVIIHWNACIYYAISKALGLSSDT-----WVYSGQNK-----  
-----TSLFCYVYCFYWSTLTLTTIGEMPP-----PVKDEEYVVFVDFLGVGL

IFATIVGNVGSMIANMNATRAEFQTRIDAIAKHMHFRKVNRTLETRVIKWFYDYLWTNKK-T-VDEQEVLKNLDPKLRAEIAI  
NVHLDLTKKVRIFQDCEAGLLVELVLKLRPQVYSPGDYICRKGDIGKEMYIIKEGQLAVVADD--GVTQFALLTAGGCFGEISI

LNIQGS-----KMGNRRTANIRSIGYSDLFCLSKDDLMEAVAEYPDAQKVLLEERGRELKQGLLDESVAAGGLGVIDTE-EKV  
ERLDASLDILQTRFARLLGEFTSTQRRKQRITALERQLCHTGLGLLSDNEAEGEHAGVPTHTHADIHAQPETHTRTSAETNS

EEET-----



-----</seq-data>

</sequence>

<sequence seq-type="Protein">

<seq-name>CNG3\_BOVIN</seq-name>

<seq-info><length>2009</length></seq-info>

<seq-data>

-----MAKISTQYSHPTRT  
HPSVRTMDRDLDCIENGLSRTHLPCEETSSSELQEGIAMETRGLAESRQSSFTSQGPTRLRLIISLRAWSARHLHQEDQRPD  
SFLERFRGAELQEVSSRESHVQFNVGSQEPDRGRSAWPLARNNTNTCNNSEKDDKAKKEEKEEKKENPKKE-----  
-----EKKKDSVMDPSSN-MYYHWLTVIAPVPFYNWCLLVCRAFDELQSEH-----  
-----LMLWLVLVDYSADILYGMDMLVRARTGFLE-----QGLMVMDASRLWKHYTQTLHFKLDVLSLVPTDLAYFKLG  
M-----NYPELRFNRLLKLARLFEFFDRTETRTNYP-----NMFRIGNLVLYLIIHWNACIYFAISKFIG  
FGTDS-----WVYPNVSNPE-----YGRLSRKYIYSLYWSTLTLTTIGETPP-----  
-----PVKDEEYLFVVIDFLVGLIFATIVGNVGSISMNASRAEFQAKIDSIKQYMQFRKVTKDLETRVIRWF  
DYLWANKK-T-VDEKEVLKSLPDKLKAEIAINVHLDLTKVRIFQDCEAGLLVELVLKLRPAVFSPGDYICKKGDIGREMYIIE  
GKLAVVAED--GITQFVVLGDGSYFGEISILNIKGS-----KSGNRRTANIRSIGYSDLFCLSKDDLMEALTEYPEAKKALEEKGR  
QILMKDNLIDEELAKAGADPKDIE-EKVEHLETSLDSLQTRFARLLAEYNATQMKVKQRLSQLESQVKMGLPPDGDAPQTE  
ASQP-----

-----</seq-dat

a>

</sequence>

<sequence seq-type="Protein">

<seq-name>CNG\_DROME</seq-name>

<seq-info><length>2009</length></seq-info>

<seq-data>

-----MRHFVKAMVQSLDISAITGQQTDAEPSKRKPSALRRTLQALRQLTK  
RNRPKPPDWFLEKFSNTTNTDKIRKGC PAMEDAALSSEIRGS-----SVLCNRLSVDPTLQ-SHYRWLAIVSLAV  
LYNIIFVVGRAVFEINKSA-----PAFWYTLDYLCDFIYLLDTLVHMHGFLD---  
---QGLLVRDAFRLRRHYFHTKGWYLDVLSMLPTDLAYIWPPETCSSLYLP-----CPVIVRLNRLLRINRL  
WEWFDRTETATGYP-----NAFRICKVVLAILVLIHWNACMYFAISYEIGFSSDS-----WVYNLNGTRN-----  
-----NTLQRQYIYSFYWSTLTLTTIGETPT-----PENDVEYLFVVDVADFLAGVLIFA  
TIVGNIGSMISNMNVARVEFQNRMDGVKQYMAFRRVGHELEARVIRWFAYTWSQSG-A-LDEERVLAALPDKLKAEIAIQ

VHMDTLKQVRIFHDTEPGLLEALVLKLLQVFSPGDYICRKGVDVGKEMYIVKRGKLSVVGDD--GITVLATLGAGSVFGEVSV  
LEIAGN-----RTGNRRRTANVRSLGYSDLFCLAKRDLWETLSDYPEARSTLTQRGCQLLRKDGLLDEQIFADSQRVHDSIEGGI  
EKLELSVENLNMRLARLLAEYASQAKIKQRLAKLEMNGGPGTWRLECEPQSRARSGRLYSLQPKRRPRSRPDATAKSSDA  
AKQNTL-----

-----</seq-data>

</sequence>

<sequence seq-type="Protein">

<seq-name>CNGX\_RAT</seq-name>

<seq-info><length>2009</length></seq-info>

<seq-data>-----

-----MSQDGK

VKTTESTPPAPT-----KARKWLPVLDPSGD-YYYWWLNTMVFPIMYNLIIVVCRAFCPDLQHSY-----  
-----LVAWFVLDYTSDLLYLLDIGVRFHTGFLE-----QGILVVDKGMIASRYVRTWSFLLDLAS  
LVPTDAAYVQLGP-----HIPTLRLNRFLRVPRLF EAFDR TETRTAYP-----NAFRIAKLMLYIFVVIH  
WNSCLYFALSRYLGFGRDA-----WVYPDPAQPG-----FERLRRQYLYSFYFSTLIL  
TTVGDTP-----PDREEEYLFMVGDFLLAVMGFATIMGSMSSVIYNMNTADAAFPDHALVKKYM  
KLQHVNKRLERRVIDWYQHLQINKK-M-TNEVAILQHLPERLRAEVAVSVHLSTLSRVQIFQNC EASLLEELVLKLPQTYS  
GEYVCRKGDIGREMYIIREGQLAVVADD--GVTQYAVLGAGLYFGEISIINIKGN-----MSGNRRTANIKSLGYSDLFCLSKED  
LREVLSEYPQAQAVMEEKGREILLKMNKLDVNAEAAEIALQEATESRLKGLDQQLDDLQTKFARLLAELESSALKIAYRIERL  
EWQTREWPMPEDMGEADDEAEPGEGTSKDGEGKAGQAGPSGIE-----

-----</seq-data>

</sequence>

<sequence seq-type="Protein">

<seq-name>Q9XFS1</seq-name>

<seq-info><length>2009</length></seq-info>

<seq-data>-----

-----MMNPQRNKVFRFNGNDEFSTKTTRPSVSSV  
MKTVRRSFEKGEKIRTFKRPLSVHSNKNKKN-----KKKKILRVMNPND-SYLQSWNKIFLLLSVVALAFDPLF  
FYIPYVKPERFCLNLDKLL-----QTIACVFRTFIDAFYVHMLFQFHTGFITPSSSGFGRG  
ELNEKHKDIALRYLGS-YFLIDLLSILPIPVVLAIVPRMRRPASLVAK-----ELLKWWIFCQYVPRIARIYPLFKEVTR  
TSGLVTET-----AWAGAALNLFYMLASHVFGSFWYLIS--IERKDRC-----WREACAKIQNCTHAYLYCSPTGEDNRLF-LN



GSCPLIDPEEITNSTVFNFGIFADALQSGVVESRDFPKKFFYCFWWGLRNLSALGQNLKT-----SAFE  
GEIIFAIVICISGLVLFALLIGNMQKYLQSTTVRVEEMRVKRRDAEQWMSHRMLPDDLRLKRIRKYEYKWQETK-G-VEEEA  
LLSSLPKDLRKDIKRHLCLKLLKVPWFQAMDDRLLDALCARLKTVLYTEKSYIVREGEPVEDMLFIMRGNLISTTTY--GGRT  
GFFNSVDLVAGDFCGD-LLT-----WALDPLSSQ-FPISSRTVQALTEVEGFLLSADDLKFVATQYRRLHSKQLRHMFRFYSV  
QWQTTWAACFIQAAWKRHCRRKLSKALREEEGKLHNTLQNDSSGGNKLNLGAAIYASRFASHALRNLRANAAARNRFRP  
HMLTLLPQKPADPEFPMDET-----

</seq-d

ata>

</sequence>

<sequence seq-type="Protein">

<seq-name>CAB45784</seq-name>

<seq-info><length>2009</length></seq-info>

<seq-data>-----

-----MDMNDSQKKYSFLLMIFCLGSEIGFQREQT-----RP  
SLNTVLKNVRRGLKKPLSFGSHNKKRDSNS-----STTTQKNIINPQGS-FLQWNKIFLFASVIALAIDPLFFYIPI  
VDGERHCLNLHRNL-----EIAASVLRTFIDAFYIIHIVFQFRTAYISPSSRVFGRGELVDDP  
KAIAIKYLSS-YFIIDLLSILPLPQLVVLAVIPNVNKPVS LITK-----DYLITVIFTQYIPRILRIYPLYTEVTRTSGIVTET----  
-AWAGAAWNLSLYMLASHVFGALWYLIS--VEREDRC-----WREACEKIPEVCNFRFLYCDGNSSVRNDFLTSCPFINPD  
DITNSTVFNFGIFTDALKSGIVESDDFWKKFFYCFWWGLRNLSALGQNLNT-----SKFVGEIIFAVSICI  
SGLVLFALLIGNMQKYLESTTVREEEMRVKRRDAEQWMSHRMLPDDLRLKRIRRYEYKWQETR-G-VEEENLLRNLPKDL  
RRDIKRHFCLDLLKVP LFEIMDEQLLDAVCDKLPVLYTENSYAIREGDPVEEMLFVMRGKLM SATTN--GGRTGFFNAVY  
LKPSDFCGEDLLT-----WALDPQSSSHFPISTRVQALTEVEAFALAADDLKLVASQFRRLHSKQLQHTFRFYSVQWRTWG  
ASFIQAAWRRHCRRKLARSLTEEDRFRNAITKRERNAASSSLVATLYASRFASNALRNLRNLP LPPK PSEPDFSLRNP-

</seq-data>

</sequence>

<sequence seq-type="Protein">

<seq-name>O65717</seq-name>

<seq-info><length>2009</length></seq-info>

<seq-data>-----

-----MNFREQKFVRFQDWKSDKTSSDVEYSGKNEIQTGIFQRTI  
SSISDKFYRSFESSARIKLFKRSYKSYFKEAVSK-----GIGSTHKILD PQGP-FLQRWNKIFVLACIIAVSLDPLFF

YVPIIDDAKKCLGIDKKM-----EITASVLRSTDFVYVLHIIFQFRTGFIAPSSRVFGRGVL  
VEDKREIAKRYLSS-HFIIDILAVLPLPQMVILIIIPHMRGSSSLNTK-----NMLKFIVFFQYIPRFIRIYPLYKEVTRTSGI  
LTET-----AWAGAAFNLFYMLASHVFGAFWYLF--IERETVC-----WKQACERNPPCISKLLYCDPETAGGNAFLNESC-  
---PIQTPNTTLDFDFGIFLDALQSGVVESQDFPQKFFYCFWWGLQNLSSLGQNLKT-----STYIWEICF  
AVFISIAGLVLFSLIGNMQTYLQSTTTTRLEEMRVKRRDAEQWMSHRLLPENLRKRIRRYEQYKWQETR-G-VDEENLLSNL  
PKDLRRDIKRHLCLALLMRVPMFEKMDDEQLLDALCDRLQPPLYTEESYIVREGDPVDEMLFIMRGKLLTITN--GGRTGFL  
NSEYLGAGDFCGEELLT-----WALDPHSSSNLPISTRTVRALMEVEAFALKADDLKFVASQFRRHLHSKQLRHTFRYYSQQW  
KTWAACFIQAAWRRYIKKKLEESLKEEENRLQDALAKEACGSSPSLGATYASRFAANILRTIRRSVSVRKPRMPERMPMML  
LQKPAEPDFNSDD-----

-----</seq-data>

</sequence>

<sequence seq-type="Protein">

<seq-name>O65816</seq-name>

<seq-info><length>2009</length></seq-info>

<seq-data>-----

-----MEREDRYVRFQDCKSEQSVISENAVSPRRH-----CV  
FRSLKERTGGLFAFLGNFLRSETLKRSML-----DRKSMQNVFHPQGP-FLQRWNKIFVLSCIFAVSVDPLFLYI  
PVINDKNLCWYLDKRM-----KITASVLRSTDFIFYLHIIFQFRTGFITSSSTNFGRGVLVE  
DRYAIKRYLST-YFLIDVCAVLPLPQVVIWIVLPTLQVSQFMKAK-----NILMLVICQYVPRVIRIRPLYLQITRSAG  
IITET-----AWAGAAFNLIYMLASHVLGAVWYLLS--IQRKDAC-----WKQNCSLTRDCNPAYLYCGNGGTNAGNAFLQN  
VC--VPNITKDNLDPDLFGIFVPAI-NNVSQSTDFFAKLFYCVWWGLQNLSSLGQNLKT-----STYAW  
ENLFAVFSISGLVLFSLIGNMQTYLQSATLRIEETRVKSRDQWMSYRLLPDNLKERIRRYEQYRWQETS-G-VDEEHL  
MNLPKDLRRAIKRHLCLSLKRVPMFEKMDQLLNALCDCLKPPLYTEGGCIVREGDPVNEMFFITRGNLMSMTN--GG  
KTGFFNSDVLKSGDFCGEELLT-----WALDPNSATSLPSSTRTVKSMSEVEAFALMAEDLKFVAMQFRRHLHSKQLRHTFR  
YSQQWRTWAACFIQAAWHRRRCRKKMEDALREKEERLQLAIVNDGSTSLSFGAAYASRFARNMMRTLRRNATR KARLQ  
ERVPARLLQKPAEPNFSAEQ-----

-----</seq

-data>

</sequence>

<sequence seq-type="Protein">

<seq-name>CIK1\_DROME</seq-name>

<seq-info><length>2009</length></seq-info>

<seq-data>-----

-----MAA

VAGLYGLGEDRQHRKKQQQQQHQKEQLEQKEEQKKAERKLQLREQQQLQRNSLDGYGSLPKLSSQDEEGGAGHGFGG  
GPQHFEPIPHDHDFCERVVINVSGLRFETQLRTLNQFPDTLLG-----DPARRLRYF  
DPLRNEYFFDRSRPSFDAILYYYQSGGRLRRPVNVPLDVFSEEIKFYELGDQAINKFREDEGFIK-----EEERPLP  
DNEKQ-----RKVWLLFEYPESSQAARVVAIISVVFVILLSIVIFCLETLPFEFKHYKVFNTTTNGTK--IE  
ED-----EVPDITDPFFLIETLCIIWFTFELTVRFLACP-----NKLNFCRDVMNVIDIIAIPY  
FITLATVVAEEEDTLNLPKAPVSPQDKS-----SNQAMSLAILRVIRLVRVFRIFKLSRHSKGLQILGRTLKASMRELGLLIFFL  
FIGVVLFSVAVYFAEA-----GSENSFFKSIPDAFWWAVVTM  
TTVGYGDMT-----PVGFWGKIVGSLCVVAGVLTIALPVPVIVSNFNFYHREADREE-MQSQN-FNH  
VTSCSYLPGALGQHLKKSS-LSESSDIMDLDDGIDATTPGLTDHTGRHMVPFLRTOQSFQKQQL-----  
-----QLQLQLQQQSQSPHGQQMTQQQQLGQNGLRSTNSLQLRHNNAMAVSIETDV-----

-----</seq-data>

</sequence>

<sequence seq-type="Protein">

<seq-name>CIK2\_DROME</seq-name>

<seq-info><length>2009</length></seq-info>

<seq-data>-----

-----MTMWQSGGMGGHGSQNNPWMKLMGIVHKERRHTENVQSQSGSNERNLNQSLPKLSSQDEEGGAGHGFGGGP  
QHFEPHDPHDHDFCERVVINVSGLRFETQLRTLNQFPDTLLG-----DPARRLRYFDPL  
RNEYFFDRSRPSFDAILYYYQSGGRLRRPVNVPLDVFSEEIKFYELGDQAINKFREDEGFIK-----EEERPLPDNE  
KQ-----RKVWLLFEYPESSQAARVVAIISVVFVILLSIVIFCLETLPFEFKHYKVFNTTTNGTK--IEED--  
-----EVPDITDPFFLIETLCIIWFTFELTVRFLACP-----NKLNFCRDVMNVIDIIAIPYFITL  
ATVVAEEEDTLNLPKAPVSPQDKS-----SNQAMSLAILRVIRLVRVFRIFKLSRHSKGLQILGRTLKASMRELGLLIFFLFIG  
VVLFSVAVYFAEA-----GSENSFFKSIPDAFWWAVVTMTT  
VGYGDMT-----PVGWVGKIVGSLCAIAGVLTIALPVPVIVSNFNFYHRETDQEE-MQSQN-FNHVT  
SCPYPGLTGLQHMKKSS-LSESSDMMDLDDGVESTPGLTETHPGRSAVAPFLGAQQQQQQQ-PVASSLSMSIDKQLQHP  
LQQLTQTLYQQQQQQQQQQQQNGFKQQQQQTQQQLQQQQSHTINASAAAATSGSGSSGLTMRHNNALAVSIETDV--

-----</seq-data>

</sequence>

<sequence seq-type="Protein">

<seq-name>CIK4\_DROME</seq-name>

<seq-info><length>2009</length></seq-info>

<seq-data>-----

-----MAA  
VAGLYGLGEDRQHRKKQQQQQHQKEQLEQKEEQKIAERKLQLREQQLQRNSLDGYGSLPKLSSQDEEGGAGHGFGG  
GPQHFEPHHDHDFCERVVINVSGLRFETQLRTLNFDPDTLLG-----DPARRLRYF  
DPLRNEYFFDRSRPSFDAILYYYQSGGRLRRPVNVPLDVFSEEIKFYELGDQAINKFREDEGFIK-----EERPLP  
DNEKQ-----RKVWLLFEYPRESSQAARVVAIISVIVILLSIVIFCLETLPFKHYKVFNTTTNGTK--IE  
ED-----EVPDITDPFFLIETLCIIWFTFELTVRFLACP-----NKLNFCRDVMNVIDIIAIPY  
FITLATVVAEEEDTLNLPKAPVSPQDKS-----SNQAMSLAILRVIRLVRVFRIFKLSRHSKGLQLGRTLKASMRELGLLIFFL  
FIGVVLFSVAVYFAEA-----GSENSFFKSIPDAFWWAVVTM  
TTVGYGDMT-----PVGWVWGKIVGSLCAIAGVLTIALPVPVIVSNFNFYHRETDQEE-MQSQN-FNH  
VTSCPYPGLTGLQHMKKSS-LSESSDMMDLDDGVSTPGLTETHPGRSAVAPFLGAQQQQQQQPVASSLSMSIDKQLQ  
HPLQHVTQTQLYQQQQQQQQQQNGFKQQQQQTQQQLQQQQSHTINASAAAATSGSGSSGLTMRHNNALAVSIET  
DV-----

-----</seq-data>

</sequence>

<sequence seq-type="Protein">

<seq-name>Q16968</seq-name>

<seq-info><length>2009</length></seq-info>

<seq-data>-----

-----MEVAMAGIEGNGGPAGYRDSYHSSQRPLLSSNLPNSRSFPKLSEEDNANENGMGVPGSDYDCSC  
ERVVINVSGLRFETQLKTLNFPDTLLG-----NPQKRNRYYDPLRNEYFFDRNRPSF  
DAILYFYQSGGRLRRPVNVPLDVFSEEIKFYELGENAFERYREDEGFIK-----EEEKPLQNEFQ-----  
-----RRVWLLFEYPRESSAARLCAIFSVIILLSIVIFCLETLPQFKHYRVVNSTANDSKESIEED-----  
-----DIPKFNEPFFIIETCCIIWFTFELLVRFASCP-----EKLGFKNIMNCIDIVAIIPYFITLGTVVADQSKS-----  
-----NNQAMSLAILRVIRLVRVFRIFKLSRHSKGLQLGQTLKASMRELGLLIFFLFIGVILFSVAVYFAEA-----  
-----DADQTHFKSIPDAFWWAVVTMTTVGYGDMR-----  
-----PIGVWVKLVGSLCAIAGVLTIALPVPVIVSNFNFYHREGESTD--KGQ--YKHVQSCPNYPEKDSL-----SECGS  
DIMEMEENHSTPLTEKVKENHAIKANNPGSDYGLETDV-----

-----</seq-data>

</sequence>

<sequence seq-type="Protein">

<seq-name>CIK6\_HUMAN</seq-name>

<seq-info><length>2009</length></seq-info>

<seq-data>-----

-----MRSEKSLTAAAPGEVRGPEGEQQDAGDFPEAGGGGGCCSSERLVINISGLRFE  
TQLRTLSPDPTLLG-----DPGRRVRFDFPLRNEYFFDRNRPSFDAILYYYQSGGRLR  
RPVNVPLDIFLEEIRFYQLGDEALAAFREDEGCLP-----EGGEDEKPLPSQPFQ-----R  
QVWLLFEYPESGPARGIAIVSVLVILISIVIFCLETLPQFRVDGRGGNNGGVSRSVSPVSRGSQEEEEDEDDSYTFHHGITPGE  
MGTGGSSSLSTLGGSFFTDPFFLVETLCIVWFTFELLVRFSAAP-----SKPAFFRNIMNIIDLVAIFPYFITLGTSLV  
QQQEQQPASGGGGQN-----GQQAMSLAILRVIRLVRFVFRIFKLSRHSKGLQILGKTLQASMRELGLLIFFLFIGVILFS  
SAVYFAEA-----DDDDSLFSPIDAFWWAVVTMTTVGYG  
DMY-----PMTVGGKIVGSLCAIAGVLTIALPVPVIVSNFNFYHRETEQEE--QGQ--YTHVTCGQP--  
APDLRAT-----DNGLGKPDFPEANRE  
RRPSYLPTPHRAYAEKRMLTEV-----

-----</seq

-data>

</sequence>

<sequence seq-type="Protein">

<seq-name>CIK2\_HUMAN</seq-name>

<seq-info><length>2009</length></seq-info>

<seq-data>-----

-----MTVATGDPADAAAALPGHPQDTYDPEADHECCERVVINISGLRFETQL  
KTLAQFPETLLG-----DPKKRMRYFDPLRNEYFFDRNRPSFDAILYYYQSGGRLRRP  
VNVPLDIFSEEIRFYELGEEAMEMFREDEGYIK-----EEERPLPENEFQ-----RQVW  
LLFEYPESGPARIIAIVSVMVILISIVSFCLETLPIFRDENEDMHGSGVTFHTYSNSTIGYQQ-----STSFT  
DPFFIVETLCIIWFSFEFLVRFACAP-----SKAGFFTNIMNIIDIVAIIPYFITLGTSLAEKPEDAQQ-----  
-GQQAMSLAILRVIRLVRFVFRIFKLSRHSKGLQILGQTLKASMRELGLLIFFLFIGVILFSSAVYFAEA-----  
-----DERESQFPSIPDAFWWAVVSMTTVGYGDMV-----PTTIG  
GKIVGSLCAIAGVLTIALPVPVIVSNFNFYHRETEGEE--QAQ--YLQVTSCPPIPSSPDLKKSRSRSTISKSDYMEIQEGVNN-  
-----SNEDFREENLKTANCTLANCTANTNYVNITKMLTDV

-----</seq-data>

</sequence>

<sequence seq-type="Protein">

<seq-name>CIK2\_XENLA</seq-name>

<seq-info><length>2009</length></seq-info>

```
<seq-data>-----  
-----  
-----  
-----  
-----  
-----MTVATGDLTDGSGVFAGHPQDSYDPEPDHECCERVVINISGLRFETQL  
KTLSQFPETLLG-----DPKCRMRYFDPLRNEYFFDRNRPSFDAILYFYQSGGRLRRP  
VNVPLDIFSEEIRFYELGEEAMEIFREDEGFIK-----EEERPLPDNEFQ-----KQVWL  
LFEYPESGPARIIAISVTVILISIVSFCLLETLPVFRDENEDMHGSGGNYYSYPNSTVRFQK-----SNTFT  
DPFFIVETLCIWFSEFLVRFLACP-----SKAVFFTnlmniidivaiipyfitlgteLaektedgqq-----  
-GQQAMSLAILRVIRLVRVFRIFKLSRHSKGLQLGQTLNASMRELGLLIFFLFIGVILFSSAVFFAEA-----  
-----DERDSQFPSIPDAFWWAVVSMTTVGYGDMV-----PTTI  
GGKIVGSLCAIAGVLTIALPVPVIVSNFNFYHRETEGEE--QAQ--YLQVTSCPKIPSSPDLQKRSRSA-STLSKSDYMEIQEGVN  
H-----SNEDFREKNLKTANCTLGNTNYVNITKMLT  
DV-----  
-----  
-----</seq-data>
```

</sequence>

<sequence seq-type="Protein">

<seq-name>CIK4\_HUMAN</seq-name>

<seq-info><length>2009</length></seq-info>

```
<seq-data>-----  
-----  
-----  
-----MEVAMVSAESSGCNSHMPYGYAAQARARERERLAHSRRAAARAVAA  
ATAAVEGSGGGGGSHHHQSRGACTSHDPQSSRGSREEEATRSEKKKAHYRQSSFPHCSDLMPSGSEEKILRELSEEEEE  
EEEEEEEEEEGRFYSEDDHGDECSYDLLPQDEGGGGYSSVRYSDDCERVVINVSGLRFETQMKTLAQFPETLLG-----  
-----DPEKRTQYFDPLRNEYFFDRNRPSFDAILYYYQSGGRLKRPVNVNPFIFTEEVKIFYQLGE  
EALLKFREDEGFVR-----EEEDRALPENEFK-----KQIWLLFEYPESSDPARGIAIVSV  
LVILISIVIFCLETLPEFRDDRDLVMALSAGGHGGLLNDTSAPHLN-----SGHTIFNDPFFIVETVCIVWFSF  
EFVVRFCACP-----SQALFFKNIMNIIDIVSILPYFITLGTDLAQQQGGGN--GQ-----QQQAMSFALR  
IIRLVRVFRIFKLSRHSKGLQLGHTLRASMRELGLLIFFLFIGVILFSSAVYFAEA-----  
-----DEPTTHFQSIPDAFWWAVVTMTTVGYGDMK-----PITVGGKIVGVLCIAG  
VLTIALPVPVIVSNFNFYHRETEENEE--QTQL-TQNAVSCPYPNSLLKKFRSSTSSSLGDKSEYLEMEEGVKESLCAKE-----  
-----EKC--QAK-GDDSETDKNNCSNAKAVETDV-----  
-----  
-----</seq-data>
```

</sequence>

<sequence seq-type="Protein">

<seq-name>CIK5\_HUMAN</seq-name>

<seq-info><length>2009</length></seq-info>

<seq-data>

-----MEIALVPLENGGAMTV  
RGGDEARAGCGQATGGELQCPPTAGLSDGPKEPAPKGRGAQRDADSGVRPLPLPDGVRPLPLPEELPRRRPPPEDE  
EEEGDPGLGTVEDQALGTASLHHQRVHINISGLRFETQLGTLAQFPNTLLG-----D  
PAKRLPYFDPLRNEYFFDRNRPSFDGILYQQSGGRLRRPVNVSLDVFADIRFYQLGDEAMERFREDEGFIK-----  
---EEEKPLPRNEFQ-----RQVWLIFEYPSSGARSARAIIVSVLVILISITFCLETLPFRDERELLRHP  
PAPHQPPAPAPGANGSGVMAPPSGPTVAPLL-----PRTLADPFFIVETTCVIWFTFELLVRRFFACP-----  
SKAGFSRNIMNIIDVVAIFPYFITLGTLEAEQQPGGGGGGQN-----GQQAMSLAILRVIRLVRVFRIFKLSRHSKGL  
QILGKTLQASMRELGLLIFLFIGVILFSSAVYFAEA-----DN  
QGTHFSSIPDAFWWAVVTMTTVGYGDMR-----PITVGGKIVGSLCAIAGVLTIALPVPVIVSNFNFYF  
YHRETDHEE-PAVLK-EEQGTQSQGPGLDRGVQRKVSRSRGSFCKAGGTLENADSARRGSCP-----  
-----LEKCNVKAKSNVDLRRSLYALCLDTSRETDL-----

</seq-data>

</sequence>

<sequence seq-type="Protein">

<seq-name>CIK3\_HUMAN</seq-name>

<seq-info><length>2009</length></seq-info>

<seq-data>

-----MTVVPGDHLEPEVADGGGAPPQGGCGGGGCDRYEPLPPSLPAAGEQDCCGERVVIN  
ISGLRFETQLKTLQCFPETLLG-----DPKRRMRYFDPLRNEYFFDRNRPSFDAILY  
QSGGRIRRPVNPIDIFSEEIRFYQLGEEAMEKFREDEGFLR-----EEERPLPRRDFQ-----  
-----RQVWLLFEYPSSGPARGIAIVSVLVILISIVIFCLETLPFRDEKDYPASTSQDSFEAAGNSTSGSRAG-----  
-----ASSFSDPFFVETLCIIWFSEFELLVRRFFACP-----SKATFSRNIMNLIDIVAIIPYFITLGTLEAERQGN-----  
-----GQQAMSLAILRVIRLVRVFRIFKLSRHSKGLQILGQTLKASMRELGLLIFLFIGVILFSSAVYFAEA-----  
-----DDPTSGFSSIPDAFWWAVVTMTTVGYGDMH-----  
-----PVTIGGKIVGSLCAIAGVLTIALPVPVIVSNFNFYHRETEGEE--QSQ--YMHVGCQHLSSSAEELRKARSNSTLSKSEY  
MVIEEGGM-----NHSAFPQTPFKTGNSTATCTTNNNP  
NSCVNIKKIFTDV-----

</seq-data>

</sequence>

<sequence seq-type="Protein">

<seq-name>CIK1\_HUMAN</seq-name>

<seq-info><length>2009</length></seq-info>

<seq-data>

-----  
-----  
-----  
-----  
-----  
-----  
-----  
-----MTVMSGENVDEASAAPGHPQDGSYPRQADHDDHECCERVVINISGLRFE  
TQLKTLAQFPNTLLG-----NPKKRMRYFDPLRNEYFFDRNRPSFDAILYYYQSGGR  
LRRPVNVPLDMFSEEIKFYELGEEAMEKFREDEGFIK-----EEERPLPEKEYQ-----R  
QVWLLFEYPESGPARVIAIVSVMVILISIVIFCLELPELKDDKDFTGTVHRIDNTTVIYN-----SNI  
FTDPFFIVETLCIIWFSFELVVRFFACP-----SKTDFFKNIMNFIDIVAIIPIYFITLGTEIAEQEGNQK-----  
---GEQATSLAILRVIRLVRVFRIFKLSRHSKGLQILGQTLKASMRELGLLIFLFIGVILFSSAVYFAEA-----  
-----EEAESHFSSIPDAFWWAVVSMTTVGYGDMY-----PVTI  
GGKIVGSLCAIAGVLTIALPVPVIVSNFNFYHRETEGEE--QAQ--LLHVSS-PNLASDSDLR-RSS-STMSKYEYMEIEEDMN  
NS-----IAHYRQVNIRTANCTTANQNCVVKSKLLT  
DV-----

</seq-data>

</sequence>

<sequence seq-type="Protein">

<seq-name>CIKB\_HUMAN</seq-name>

<seq-info><length>2009</length></seq-info>

<seq-data>

-----  
-----  
-----  
-----  
-----  
-----  
-----  
-----MAEKAPPGLNRKTSRSTLSLPPEPVDIIRSKTCSRVKINVGGLNHEVLW  
RTLDRLPRTLGLRDCNTHE-----SLLEVCDDYNLNENEYFFDRHPGAFTSILNFYRTG-KL  
HMMEEMCALSGQELDYWG-IDEIYLESCCQARYHQKKEQMNEELRREAETMRDGEGEFEEDNTCCPDKR-----  
-----KKLWDLLEKPNSSVAAILAIVSILFIVLSTIALSLNTLPELQETDEF-----  
--GQLNDNRQLAHVEAVCIAWFTMEYLLRFLSSP-----NKWKFFKGPLNVIDLLAILPYYVTIFLTESNKSVL-----  
-----QFQNVRRVVQIFRIMRILRILKLARHSTGLQSLGFTLRRSYNELGLLILFLAMGIMIFSSLVFFAEK-----  
-----DEDATKFTSIPASFWWATITMTTVGYGDIY-----  
-----PKTLLGKIVGGLCCIAGVLVIALPIIIVNNFSEFYKEQKRQEK-AIKRREALERAKRNGSIVS---MNLKDAFARSMELIDV  
AVEKAGESANTKDSADDNHLSPSRWKWARKALSETSSNKSFENKYQEVSQKDSHEQLNNTFSSSPQHLSAQKLEMLYNEI  
TKTQPHSHPNPDCQEKPERPSAYEEEEIEMEEVCPQEQLAVAQTEVIVDMKSTSSIDSFTSCATDFTETERSPLPPPSASHL  
QMKFPTDLPGTEEHQRARGPPFLTLSREKGAARDGTLEYAPVDITVNLASGSQCGLHSPLQSDNATDSPKSSLKGSNPL  
KSRSLKVNFKENRGSAPQTPPSTARPLPVTTADFSLTTPQHISTILLEETPSQGDRPCWALRFQRLVRDLPKGCPPGFPSRNC  
SLSLQERGGASLK-----

</seq-data>



</sequence>

<sequence seq-type="Protein">

<seq-name>CIKB\_CANFA</seq-name>

<seq-info><length>2009</length></seq-info>

<seq-data>

-----MAEKAPPGLNRKTSRSTLSLPPEPVDIIRSKTCSRRVKINVGGLNHEVLW  
RTPDRLPRTRLGKLRDCNTH-----SLLEVCDYDNLGHNEYFFDRHPGAFTSILNFYRTG-KL  
HMMEEMCALSVGQELDYWG-IDEIYLESCCQARYHQKKEQMNEELRREAETMRDGE GEEFDNTCCPEKR-----  
-----KKSRLLEKPNSSVAAKILAIVSNLFIVLSTIALSLNTPPELQEMDEF-----  
---GQPNDNPQLAHVEAVCNAWFTMEYLLRFLSSP-----NKWKFFKGPLNVIDLLAILPYYVTIFLTESNKSVL---  
-----QFQNVRRVVQIFRIMRILRILKLARHSTGLQSLGFTLRRSYNELGLLILFLAMGIMIFSSLVFFAEK-----  
-----DADATKFTSIPASFWWATITMTTVGYGDIY-----  
-----PKTLLGKSVGGLCCIAGVLVIALPIPIIIVPPFSEFYKEQKRQEK-AIKRREALERAKRNGSIVS---MNLKDAFARSMELI  
DVAVEKAGESSTKDSADDNHLSPSRWKWARKALSETSSNKSYENKYQEVSQKDSHEQLNNTSSSSPQHLSAQKLEMLYN  
EITKTQPHPAPNPDGQEQPDRPSAYEEEEIEMEEVVCPEQLAVAQGEVIVDMKSTSSIDSFTSCATDFTETERSPLPPLSAS  
HLQMRFPDLAGTDEHQRARGPPFLMLARGKGPAGRDAILEYAPVDITVSLDASGSKVGSHPGLQPDASASEPKSSLKGS  
NPLKSRSLRVNFKENRGSAQTPPSTARPLPVTTADFSLTAPQLISTILLEETPSQGDRCWAPRARHTVRDLPRGCPPGFPS  
RNSFLSHQERGGASLK-----

</seq-data>

</sequence>

<sequence seq-type="Protein">

<seq-name>CIKA\_HUMAN</seq-name>

<seq-info><length>2009</length></seq-info>

<seq-data>

-----MTKHGSRSTSSLPPEPMEIVRSKACSRRLNVLNVGGLAHEVLWRTL  
DRLPRTRLGKLRDCNTHD-----SLLEVCDYDNLGHNEYFFDRHPGAFTSILNFYRTG-RLHM  
MEEMCALSFQELDYWG-IDEIYLESCCQARYHQKKEQMNEELKREAETLREREGEEFDNTCCAERK-----  
-----KKLWDLLEKPNSSVAAKILAIISIMFIVLSTIALSLNTPPELQSLDEF-----GQS  
TDNPQLAHVEAVCIAWFTMEYLLRFLSSP-----KKWKFFKGPLNAIDLLAILPYYVTIFLTESNKSVL-----  
-----QFQNVRRVVQIFRIMRILRILKLARHSTGLQSLGFTLRRSYNELGLLILFLAMGIMIFSSLVFFAEK-----  
-----DEDDTKFKSIPASFWWATITMTTVGYGDIY-----PK  
TLLGKIVGGLCCIAGVLVIALPIPIIIVNNFSEFYKEQKRQEK-AIKRREALERAKRNGSIVS---MNMKDAFARSIEMMDIVVEK  
NGENMGKKDKVQDNHLSPNKWKWTKRTLSETSSSKSFETKEQGSPEKARSSSSPQHNLVQQLQEDMYNKMMAKTQSQPIL  
NTKESAAQSKPKKEELEMESIPSPVAPLPTREVIDMRSMSIDSFISCATDFPEATRFHSPLTSLPSKTGGSTAPEVGVWRG  
ALGASGGRFVEANPSPDASQHSFFIESPKSSMKTNNPLKLRALKVNFMEGDPSPLLPVGLGMYHDPLRNRRGSAAA VAGL

ECATLLDKAVLSPESIIYTTASAKTPPRSPEKHTAIAFNFEAGVHQYIDADTDDEGQLLYSVDSSPPKSLPGSTSPKFSTGTRSE  
KNHFESSPLPTSPKFLRQNCIYSTEALTGKGPSGQEKCKLENHISPDVRLVPGGGAHGSTRDQSI-----

-----</seq-data>

</sequence>

<sequence seq-type="Protein">

<seq-name>CIKB\_DROME</seq-name>

<seq-info><length>2009</length></seq-info>

<seq-data>-----

-----MVGQLQGGQAAGQQQQQQQATQQ  
QQHSKQQLQQQQQQQQQLQLKQHQQQQQDILYQQHNEAIAIARGLQAATPADIGDNQPYDTSGNVDWERAMGA  
GGAGAYGGIGIGSLPAAGGAAYHLGPANPAGLVSRHLDYDGGHLAGPSAGLPAGAVGSGAGAGAGASVTGS----GS  
GAGTGTGTGAGSGSGGAAGKEVRYAPFPVASPTHSIPTTSQQIVGGVGGVGGASSQSISGGVPTHSQSNTTGALQR  
THSRSMSSIPPEPFMIAQSKAVNSRVSINVGGVRHEVLWRTLRLPHTRLGRLGECTTHE-----  
-----AIVELCDDYSLADNEYFFDRHPKSFSSILNFYRTG-KLHIVDEMCVLAFGDDLEYWG-VDELYLESCCQHXYHQRKENV  
HEEMRKEAESLRQRDEEEFGEGKFSEYQ-----KYLWELLEKPNTSFAARVIAVISILFIVLSTIALTL  
NLTPLQLQHIDN-----GTPQDNPQLAMVEAVCITWFTLEYILRFSSP-----  
--DKWKFFKGLNIIDLLAILPYFVSLFLETKNATD-----QFQDVRVQVFRIMRILRVLKLARHSTGLQS  
LGFTLRNSYKELGLMLFLAMGVLISSLAYFAEK-----DEK  
DTKFVSIPEAFWWAGITMTTVGYGDIC-----PTTALGKVIQTVCCICGVLVVALPIPIVNNFAEFYKN  
QMRREK-ALKRREALDRAKREGSIVSFHHINLKDAFAKSMIDLIVVD-TGKQTNVHHPKGRQSTPNIGRQTLQVQSAPG  
HNLSQTDGNSTEGESTSGRNPATTGTGCYKNYDHVANLRNSNLHNRRGSSSEQDAVPPYSFDNPNARQTSMMAMESY  
RRDEQALLQQQQQQQQMLQMQQIQKAPNGNGGATGGGVANNLAMVAASSAGTAVATATNASNASNTAPGSEG  
AEGGVMEMGAVSMTTTFPRPRDCPSR-----

-----</seq-data>

</sequence>

<sequence seq-type="Protein">

<seq-name>CIKW\_DROME</seq-name>

<seq-info><length>2009</length></seq-info>

<seq-data>-----

-----MNLINMDSENRVVLNVGGIRHETYKATLKKIPATR  
LS-----RLTEALANYDPILNEYFFDRHPGVFAQVLNYYRTG-KLHYPTDVCGPLFEEE  
LEFWG-LDSNQVEPCCWMTYTQHRD-TQETLAVLDRLDLDEKPEEELARKFGFEEDYKGTISWWQEMK-----  
----PRIWSLFDEPYSSNAAKTIGVVSFFICISILSFCLKTHPDMRVPVIRNITVKTANGSNGWFLDKT-----  
----QTNAHIAFFYIEVCNAWFTFEILVRFISS-----NKWEFIKSSVNIIDYIATLSFYIDLVLQRFA-----  
-----SHLENADILEFFSIIRIMRLFKLTRHSSGLKILIQTFRASAKELTLLVFFLVLGIVIFASLVYYAERI-----

-----QPNPHNDFNSIPLGLWWALVTMTTVGYGDMA-----  
PKTYIGMFVGCALAGVLTIALPVPVIVSNFAMYYSHQARAK----LPKKRRRVLPVEQPRQPRLPGAPGGVSGCGTPGS  
GPHSGPMGSGGTGPRRMNNKTKDLVSPKSDMAFSFD-----

-----</seq-data>

</sequence>

<sequence seq-type="Protein">

<seq-name>CIKD\_HUMAN</seq-name>

<seq-info><length>2009</length></seq-info>

<seq-data>-----

-----MGQGDESERIVINVGGRHQRSTLRLTPGTRL  
AWLAE-----PDAHSHFDYDPRADFFDRHPGVFAHILNYYRTG-KLHCPADVCGPLY  
EEELAFWG-IDETDVEPCCWMTYRQHRDAEEALDSFGGAPLNSADDADADGPGDSGDGEDELEMTKRLALSDSPDGR  
PGGFWRRWQ-----PRIWALFEDPYSSRYARYVAFASLFFILVSITFCLETFHERFNPIVKNKTEIENVRNGTQVRYR-----  
-----EAETEAFITYEGVCVVWFTFEFLMRVIFCP-----NKVEFIKNSLNIIDFVAILPFYLEVGLSG  
LSS-----KAAKDVLGFLRVFRVIRLIRIFKLTRHFVGLRVLGHTLRASNEFLLLIIFLALGVLI FATMIYYAER  
IGAQPNDPS-----ASEHTHFKNIPIGFWWAVVTMTTLGYGDMY---  
-----PQTWSGMLVGALCALAGVLTIAIMPVPVIVNFGMYSLAMAKQK----LPKKKKKHIPRPPQLG  
SPNYCKSVVNSPHHSTQSDTCPLAQEEILEINRAGRKPLRGMSI-----

-----</seq-da

ta>

</sequence>

<sequence seq-type="Protein">

<seq-name>CIKE\_RAT</seq-name>

<seq-info><length>2009</length></seq-info>

<seq-data>-----

-----MGKIENNERVILNVGGTRHETYRSTLKTLPGTRLA  
LLASSEPGDCLTAAGDKLQPLPPPLSPPRPPPLSPVPSGCFEGGAGNCSSHGGNGSDHPGGGREFFDRHPGVFAYVL  
NYYRTG-KLHCPADVCGPLFEEELAFWG-IDETDVEPCCWMTYRQHRDAEEALDIFETPD LIGGDPGDDDLGGKRLGIED  
AAGLGGPDGKSGRWRKLG-----PRMWALFEDPYSSRAARFIAFASLFFILVSITFCLETHEAFNIVKNKTEPVI NGT  
SAVLQY-----EIETDPALTYVEGVCVVWFTFEFLVRIVFSP-----NKLEFIKLLNIIDFV

AILPFYLEVGLSGLSS-----KAAKDVLGFLRVVRFVRLRIFKLTRHFVGLRVLGHTLRASTNEFLLLIIFLALG  
VLIFATMIYYAERVGAQPNDPS-----ASEHTQFKNIPIGFWWAVVT  
MTTLGYGDMY-----PQTWSGMLVGALCALAGVLTAMPVVPVIVNNFGMYSLAMAKQK-----LPR  
KRKKHIPPAPLASSPTFCKTELNMACNSTQSDTCLGKENRLEHNRSVLSGDDSTGSEPPLSPPERLPIRRSSTRDKNRRGET  
CFLTTGDYTCASDGGIRKGYEKSRLNNIAGLAGNALRLSPVTSPYNPCPLRRSRSPISIL-----

-----</seq-data>

</sequence>

<sequence seq-type="Protein">

<seq-name>CIKG\_HUMAN</seq-name>

<seq-info><length>2009</length></seq-info>

<seq-data>-----

-----MISSVCVSSYRGRKSGNKPPSKTCLKEEMAKGEASEKIIINVGGTRHETYRS  
TLRTLPGTRLAWLADPDGGGRPETDG-----GGVGSSGTSGGGGCEFFDRHPGVFAYVLNYYR  
TG-KLHCPADVCGPLFEEELTFWG-IDETDVEPCCWMTYRQHRDAEEALDIFESPDGGGSGAGPSDEAGDDERELALQRL  
GPHEGGAGHGAGSGGCRGWQ-----PRMWALFEDPYSSRAARVVAFASLFFILVSITTFCLETHEAFNIDRVTEILRVG  
NITSVHFRR-----EVETEPILTYIEGVCVLWFTLEFLVRIVCCP-----DTLDFVKLLNIIDF  
VAILPFYLEVGLSGLSS-----KAARDVLGFLRVVRIVRILRIFKLTRHFVGLRVLGHTLRASTNEFLLLIIFLAL  
GVLIFATMIYYAERIGARPSDPR-----GNDHTDFKNIPIGFWWAVV  
TMTTLGYGDMY-----PKTWSGMLVGALCALAGVLTAMPVVPVIVNNFGMYSLAMAKQK-----LPK  
KRKKHVPRPAQLESPMYCKSEETSPRDSTCSDTSPAREEGMIERKRAGEIRGWEGKSLFPQWPREFPNGPQTLGFGMCF  
VWGFPKHKDVPL-----

-----</seq-data>

</sequence>

<sequence seq-type="Protein">

<seq-name>CIKL\_DROME</seq-name>

<seq-info><length>2009</length></seq-info>

<seq-data>-----

-----MASVAAWLPFARAAAIGWVPIATHPLPPPPMPKDRRKTDDKLLINVSGRRF  
ETWRNTLEKYPDTLLGSN-----EREFFYDEDCKEYFFDRDPDIFRHILNYYRTG-KL  
HYPKHECLTSYDEELAFFG-IMPDVIGDCCYEDYRDRKRENAERLMDDKLSENGDQNLQQLTNMR-----

-----QKMWRAFENPHTSTSALVFYVVTGFFIAVSVMANVVETVPCGHRPGRAGTL-----PCGERYKI-----  
-----VFFCLDTACVMIFTAEYLLRIFAAP-----DRCKFVRSVMSIIDVVAIMPYYIGLGITD-----  
-----NDDVSGAFVTLRVFRVFRIFKFSRHSQGLRILGYTLKSCASELGFLVFLAMAIIFATVMFYAEK-----  
-----NVNGTNFTSIPAAFWYIVTMTTLGYGDMV-----  
-----PETIAGKIVGGVCSLSGVLVIALPVPVIVSNFSRIYHQNRADK-----RKAQRKARLARIRIAKASSGAAFVSKKAAE  
ARWAAQESGIELDDNYRDEDIFELQHHLRLRCLEKTTM-----  
-----  
-----  
-----  
-----</seq-data>

</sequence>

<sequence seq-type="Protein">

<seq-name>PKD2\_MOUSE</seq-name>

<seq-info><length>2009</length></seq-info>

<seq-data>-----  
-----  
-----

MVNSRRVQPQPPGDAGRSPAPRASGPGRLVAGGAGLAVPGGLGEQRGLEIEMERIRQAAARDPPAGASASPSPLSSCS  
RQAWSRDNPGFEAEEDDDDEVEGEEGGMVEMDVEWRPGSRRSASSSAVSSVGARGRLG----SYRGAHLSGRRR  
RLEDQGAQCPSAGGGDPLHRHLPLEGQPPRVAWAERLVRGLRGLWGTRLMEESNANREKYLKSVLRELVTYLFFLVLC  
ILTYGMMSSNVYYYTRTLSQLFIDTPVSKTEKTNFKTLSSMEDFWKFTEGSFLDGLYWKAQTSNHTQADNRSFIFYENLLL  
VPRLRQLRVRNGSCSIPQDLRDEIKECYDVYSVSSSEDRAPFGPRNGTA-----WIYTSERELNGSSHWGIIASYS-GAGYYLD  
LSRTREETAQAQ-----LAGLRRNFWLDRGT-RAAFIDFSVYNANINLFCVVRLLAEFPATGGVVP  
WQFQ-----PVKLIRYVTAFFDFFLAACEIIFCFIIYYVVEEILEIRI-----HRLSYFRSFWN  
CLDVVIVVLSVVMVINIYRMSNAEGLLQFLEDQNS----FPNFEHVAYWQIQFNIAAVMVFLVWIKLKFIFNRTMSQL  
STTMSRCAKDLFGFTIMFSIIFLAYAQLAYLVFG-----TQ  
VDDFSTFQECIFTQFRILGDINF-----AEIEEANRVLGPLYFTTFVFFMFFILLNMFLAIINDSYSEVKSDLA  
QQK--AEMELSDLIRKGCQKALVKLKLKRNTVDAISESLRQGGGKLNFDLQDLKKGHTDAEIEAIFTKYDQDGDQELTE  
REHQQMRDDLEKEREDLDLEHSSLPRPMSSRSFPRSLDDSEEEDEDSGHSSRRRGSISSGVSYEEFQVLVRRVDRMEHSI  
GSIVSKIDAVIVKLEIMERAKLKRREVLGRLLDGVAEDARLGRDSEIHREQMERLVREELERWESDDAASQTGHGVSTQVG  
LGGQPHPRNSRPPSSQSAEGLEGGSGNGSANVHA-----  
-----  
-----

</seq-data>

</sequence>

<sequence seq-type="Protein">

<seq-name>Q9W4X5</seq-name>

<seq-info><length>2009</length></seq-info>

<seq-data>-----  
-----  
-----

-----MFAITVGIIGCMICIAVF

AGFQHEDVKFKTMLVSIVIVLIFQFLIGDPIKFVILSIDRALWPPRIYIPPRCDKDEMDEKEERRDFLKQRLINKRANLMLTSRY  
RNYKLNQYKMIADHDFIYGPYFLCMLCLVLRDQTLYHNTRIITDLFMYNHTDYTGLEQEVYFLNQLFDFIESTLVLAFNSN  
STESGSPGWAHAEQSVLLGVMRLRQLRVSNPQVGLGPPKFSPTYMPDWQLPYRKLHYSKYWRIYEPWIPI-KMGFEFL  
DALLMNFHDVGSLSNYPELAGYVSLARSAAANSMKV-----IDYLSENHWLTLNT-SAVFIDFTLY  
NVDVNLFSICTLRVEKTPFGGIVPDVQVD-----SAKLENDVQMPYTGLLALLIYVLFVFIQFAQ  
TLAVKLW-----YEPHLLKSVWNKLDLDFIFMVNVLVVVLLVRESLVASMMKKVEGASKM--EFIDFRRPSRMHQ  
LTTITIGFLICITLRLWRVLQFASVFKLFTRTLYLAWSAVASTAIAIVIFLIGFCFAVVTING-----  
-----NYSSNFNKLKSMVMCMCYSFGFSAQVK-----PSELFHGGKWLGI  
LCYGVLA FVIIVLLINVFVSLINDYFTVAKTIRDSE-ENRITFFEFLVVEFSGVLGRFRKLPWRRNYVRNGRTVAENVSRKLD  
SMDRQRLMRRRLRQGRHHVSRPVSALLEYKDRGDKMVNVHYILNIQLTLIRMFLFDEYVEWPEEQKQPEAQDPD  
PNLGPDGSPQDKRQDEAEA-----

-----</seq-data>

</sequence>

<sequence seq-type="Protein">

<seq-name>Q9WTN5</seq-name>

<seq-info><length>2009</length></seq-info>

<seq-data>-----

-MSVILDDVLLIILTLDEELSAPLTPSNGLGQEDLPSKNGGGQSGPNSQVPSLVSGADSPSSPPGHNWEMNYQEAAIYLQ  
EGQNNDKFFTHPKDARALAAFLVHNHFFYMMELLTALLLLLSLCEPAVPALKLRTYVHATLELFALMVVVFELCMKLR  
WL----GFHTFVRHKRTMVKTSVLVVFQIEAIVLVRQTSHVRVTRALRCIFLVDCRYCGGVRRNLRQIFQSLPPFMDILLLLF  
FMIIIFAILGFYLFSTNPSDPYFNTLENSIVNLFVLLTTANFPDVMMPYSRNPWSCVFFIVYLSIELYFIMNLLLAVVFDTFNDI  
EKHKFKSLLLHKRTAIQHAYHLLVSQRRPAGISYRQFEGLMRFYKPRMSARERFLTFKALNQSNTPLLSLKDFYDIYEVAALQ  
WKAK-KNRQHWDFELP-----RTAFLIFKGINILV-NSKAFQYFMYLVAVNGVWILVETFMLKGGNFISK-----  
-----HVPWSYLVFLTIYGVELFMKVAGLG-----PVEYLSSGWNLFDFSLT  
AFAFLGLLALTLNME-----PFYFIVLRPLQLLRLFKLKKRYRNVLDTMFELL-PRMASLGLTLLTFYYSF  
AIVGMEFFSGRLSPNCSTPARWGLTPIDSSITRLGNKTK-----FGRKGYLNNFDNILNS  
FVTLELTVVNNWYIIME-----GVTSQTSHWSRLYFMTFYIVTMVVMTIIVAFILEAFVFR-MNYSRKS  
QESEVDSGIVIEKEMSKEELLAILELHREARGTSSDITRLDLSQMEKYQQNSMVFLGRQSRKSDLSLKMYQEEIQEWYEE  
HAREQEQQLRGSAPSPAQQTPGSRQRSQTVT-----

-----</seq-data>

</sequence>

<sequence seq-type="Protein">

<seq-name>TRP7\_HUMAN</seq-name>

<seq-info><length>2009</length></seq-info>

<seq-data>MEPSALRKAGSEQEEGFEGLP RRVTDLGMVSNLRRSNSSLFKSWRLQCPFGNNDKQESLSSWIPENIKKKEC  
VYFVSSKLS DAGKVVCCQCGYTHEQHLEEATKPHTFQGTQWDPKKHVQEMPTDAFGDIVFTGLSQVKVKKYVRVSQDTPS  
SVIYHLMTQHWGLDVPNLLISVTGGAKNFNMKPRKLSIFRRGLVKVAQTTGAWIITGGSHTGVMKQVGEAVRDFSLSSSY  
KEGELITIGVATWGTVHRREGLIHPTGSPFAEYILDEDGQGNLTCLDSNHSFILVDDGTHGQYGV EIPLRTRLEKFISEQTKE  
RGGVAIKIPIVCVVLEGGPGTLHTIDNATTNGTPCVVVEGSGRVADVIAQVANLPVSDITISLIQQKLSVFFQEMFETFTESRI  
VEWTKKIQDIVRRRQLLTVFREGKDGQQDQVDVAILQALLKASRSQDHFHGHENWDHQLKLAVAWNRVDIARSEIFMDEW  
QWKPSDLHPTMTAALISNKPEFVKLFLENGVQLKEFVTWDTLLYLYENLDPSCLFHSKLQKVLVEDPERPACAPAAPRLQM  
HHVAQVLRRELLGDFTQPLYPRPRHNDRLRLLLVPVHVKLVNQQVSLRSYKRSSGHVFTFTMDPIRDLLIWAIVQNRRELAGI  
IWAQSQDCIAAALACSKILKELS-----KEEEDTDSSEE  
MLALAEYEHRAIGVFTECYRKDEERAQKLLTRVSEAWGKTTCLQLALEAKDMKFVSHGGIQAF LTKVWWGQLSVDNGL  
WRVTLCLMAFPLLLTGLISFREKR-LQDVGTPAARARAFFTAPVVV FHLNLSYFAFLCLFAYVLMVD-----  
-----FQPVP SWCECAIYLWLFSLVCEEMRQLFYDP-----DECGLMKKAALYFSDFWNKLDVGAI  
LLFVAGLTCRLIPA-----TLYPGRVILSLDFILFCLRLMHIFTISKTLGPKIII-----VKRMMKDVFFFLFLAVW  
VVSFGVAKQAILIH-----NERRVDWLFRGAVYHSYLTIFGQIP  
GYIDGVN FNPEHCSPNGTDPYKPKCPESDATQQRPAFPEWLTVLLLCLYLLFTNILLNLLIAMFN YTFQQVQEHTDQIWK F  
QRHDLIEEYH-GRPAAPPPFILLSHLQLFIKRVVLKTPAKRHKQLKNKLEKNEEAALLSWEIYLKENYLQNRQFQQKQRPEQK  
IEDISNKVDAMVDLLDLDPLKRSQSMEQRLASLEEQAQTARALHWIVRTL RASGFSSEADVPTLASQKAAEEPDAEPGGR  
KKTEEPGDSYHVNARHLLYPNCPVTRFPVPNEKVPWETEF LIYDPPFYTAERKDAAMDPMGDTLEPLSTIQYNVVDGLR  
DRRSFHGPYTVQAGLPLNPMGRTGLRGRGSLSCFGPNHTLYPMVTRWRRNEDGAICRKS IKMLEVELVVKLPLSEHWAL  
PGGSREPGEMLPRLKRILRQEHWPSFENLLKCGMEVYKGYMDDPRNTD NAWIETVAVSVHFQDQNDVELNRLNSNLH  
ACDSGASIRWQVDRRIPLYANHKTLLQKAAAEFGAHY-----  
-----</seq-data>

</sequence>

<sequence seq-type="Protein">

<seq-name>O46129</seq-name>

<seq-info><length>2009</length></seq-info>

<seq-data>-----

-----MSKKPPRKRDLNNEERQFLGAVARGDVGSVKQALAEAEERFIDISCKDSLGRSSLVIAIENENDDLVSLLLN Y  
DVDLED SLLHAIREEYVAVEMILTHQLKFGEDYLQIEFKSNTFTADITPIILAGHIDNYEIIKMLLDRGYRIPKPHDLTCHCD  
DCLRGS LVDVLGHSRARINAYRALASPSLIALSSKDPILTAFELSWELRNLS EME NEFRAEYEELGITCQNF AVDLLEQIRGSK  
ELEVILNHDCRSPDQDEEKELKLSRLKLAIKY-----

-----KQKKFVAHPNCQQLLAAKWYEG LGNFRRKPIKQLTVAFGILFGFPIL-SGIYMIAPH SKFGKLCRKPFIKFLHSA  
SYLSFLVLLILVSQRIENPFFFLFPMK-----EKKISELRGSPATIVELMILGYVI  
GLIW-----SEIKQIWMQGALEYIHDMWNIMDLVTNSLYMATFTLRL LAWLQVRRERAELNPYAFEERKHWDAYDPNLIA  
EALFAGANIFSSKLIYIFTVNAHLGPLQIS-----LGRMVSDIVKFISVYFLVLF SFACGLNHLYWYYAALRAEECEAGITHS-----  
-----CDIKYRSFANLFEILQSLY WAVYGLVDLEHA-----HLDEPHK  
LTELIGKLMFGSYSMIAIIILLNLLIAMMSNSYQLIYSQADEEWKFARSRLWISYFAEGATVPPPFNIIPSPKSFTNMMTLFKSL  
ILSHTAEQKQAKWTNVRSTVKNINKREIRYQYVIRNLISRYIMNKQRPQKDEMVSQDDINELKQDISTFRFELLTILSDNGFE  
TPTVHQAKTSSRLDRMWKNLSAATEGQTETLMEEAGLDEE-----







```
<seq-name>Q9RH75</seq-name>
<seq-info><length>185</length></seq-info>
<seq-data>-MSGVDEKGRRLKEFREFAMKGNVVDLAVGVIIIRAFGAIVTSLVGDVIMPLIGAVTGGLDFSNYFTPLSKA
VTATNLADAKKQGAVLAWGSFLTINFIHIAFVLFVIRAINTL----KRKEEAAPAAPP-KPS----AEVELLTEIRDLLKKSCTRRL
RPNC-----</seq-data>
</sequence>
<sequence seq-type="Protein">
<seq-name>MSCL_BACSU</seq-name>
<seq-info><length>185</length></seq-info>
<seq-data>-----MWNEFKAFAMRGNIVDLAIGVVIGGAFGKIVTSLVNDIIMPLVGLLLGGLDFSGLSFTFG-----
--DAVVKYGSFIQTIVNFLIIFSIFIVIRTLNGL---RRKKEAEEEEAAEEAVD----AQEELLKEIRDLLKQQAKSPE-----
----</seq-data>
</sequence>
<sequence seq-type="Protein">
<seq-name>MSCL_CLOPE</seq-name>
<seq-info><length>185</length></seq-info>
<seq-data>-----MWKEFKFAMKGNVIDLAIGVVIGGAFGKIVTSLVNDIIMPVVGSLVGKVDNLYINLSGQQFNS
LQEAQAAGAATINYGLFLNINFLIIAFSIFIVIKQINKLKNFTKKKEEVKVEATEKDC----PYCYTKIDIKATRCPHCTSVLEEA
TN-----</seq-data>
</sequence>
<sequence seq-type="Protein">
<seq-name>MSCL_CLOHI</seq-name>
<seq-info><length>185</length></seq-info>
<seq-data>-----MWKDFKEFAMKGNVVDLAVGVIIIGGAFGKIVTSLVNDVIMPILGLLGGINFTSAKTLHLHGLN-----
-SEKPLTLNYGQFIQNILDFLIIFSIFLIRLINRF----KRKEEAVEEAKIPEIS----REEELLGEIRDLLKEKNK-----
</seq-data>
</sequence>
<sequence seq-type="Protein">
<seq-name>MSCL_SYNY3</seq-name>
<seq-info><length>185</length></seq-info>
<seq-data>MVKSARQGAGGFWRDFKDFILRGNVVDLAVAVVIGGAFTSIVNAFVAWLMVLLQPVL---DQAGVSQQLQD
L-----PLGLGELVIAIINFLIIAFVIFLIIKAIEKMQ---RKKAVEEEIVAEAQDPVLEAQTNLTD SINRLITTLENQSSSQ
-----</seq-data>
</sequence>
<sequence seq-type="Protein">
<seq-name>MSCL_STAAU</seq-name>
<seq-info><length>185</length></seq-info>
<seq-data>-----MLKEFKFALKGNVLDLAIIVVMGAAFNKISSLVENIIMPLIGKIFGSVDFAKEWSFWG-----
----IKYGLFIQSVIDFIIHAFALFIFVKIANTLM---KKEEAEEEEAV---VE-----ENVVLLTEIRDLLREKK-----</se
q-data>
</sequence>
<sequence seq-type="Protein">
```



<!DOCTYPE macsim SYSTEM "http://www-bio3d-igbmc.u-strasbg.fr/macsim.dtd">

<macsim>

<alignment>

<aln-name>1</aln-name>

<sequence seq-type="Protein">

<seq-name>BACH\_HALHP</seq-name>

<seq-info><length>387</length></seq-info>

<seq-data>-----MTAASTTATTMLQATQSDVLQEIQSNFLLNSSIWVNIALAGVVILLFVAMGRD---IESPRAK  
LIWVATMLVPLVSISSYAGLASGLTVGFLQMPPGHALAG-----QEVLPWGRYLTWTFSTPMILLALGLLA-----DTDIA  
SLFTAITMDIGMCVTGLAAALITS-----SHLLRWVFGISCAFFVAVLYVLLVQWPADA---EAAGTSEIFGTLKILTVVLW-LGY  
PILWALGSEG-VALL-SVGVTSWGYSGLDILAKYVFAFLLLRWVAANEGAVSGSGMSIGS---GGAAPADD-----  
-----</seq-data>

</sequence>

<sequence seq-type="Protein">

<seq-name>BACH\_HALHS</seq-name>

<seq-info><length>387</length></seq-info>

<seq-data>-----MTAVSTTATTVLQATQSDVLQEIQSNFLLNSSIWVNIALAGVVILLFVAMGRD---LESPRAK  
LIWVATMLVPLVSISSYAGLASGLTVGFLQMPPGHALAG-----QEVLPWGRYLTWTFSTPMILLALGLLA-----DTDIA  
SLFTAITMDIGMCVTGLAAALITS-----SHLLRWVFGISCAFFVAVLYVLLVQWPADA---EAAGTSEIFGTLKILTVVLW-LGY  
PILWALGSEG-VALL-SVGVTSWGYSGLDILAKYVFAFLLLRWVAANEGTVSGSGMGIGS---GGAAPADD-----  
-----</seq-data>

</sequence>

<sequence seq-type="Protein">

<seq-name>BACH\_HALVA</seq-name>

<seq-info><length>387</length></seq-info>

<seq-data>-----MPAASTAATLLQASQSEVLGEIQSNFLLNSSLWVNIALAGVVILLFVAMGRE---LESSRAKL  
IWWATMLVPLVSISSYAGLASGLTVGFLQMPPGHALAG-----QEVLPWGRYLTWTFSTPMILLALGLLA-----DTDM  
ASLFTAITMDIGMCITGLAAALVTS-----SHLLRWVFGISCAFFIAVLYVLLVEWPADA---EAAGTSEIFGTLKLLTVVLW-LG  
YPILWALGSEG-VALL-SVGVTSWGYSGLDILAKYVFAFLLLRWVAANEDTVTQAGMSLGS---GGAAPADD-----  
-----</seq-data>

</sequence>

<sequence seq-type="Protein">

<seq-name>BACH\_HALSS</seq-name>

<seq-info><length>387</length></seq-info>

<seq-data>-----MIETAADILAGGMVPLEMTQTQIFEAVQSDTLLASSLWINIALAGLSILLFVYMGRN---VEDPR  
AQLIFVATLMVPLVSISSYTGLVSGLTVSFLEMPAGHALAG-----QEVLPWGRYLTWALSTPMILIAVGLLA-----GSN  
TTKLFTAVVADIGMCVTGLAAALTS-----SYLLRWVWYASCAFFVVVLYILLAWEAEDA---EIAGTADIFNTLKVLTVVLW-  
LGYPIFWALGAEG-LAVL-DVAITSWAYSGMDIVAKYLFALLLRWVNNERTVADVASGLGSGSRGGAAPADD-----  
-----</seq-data>

</sequence>

<sequence seq-type="Protein">

<seq-name>O93742</seq-name>

```
<seq-info><length>387</length></seq-info>
<seq-data>-----MMETA-ADALASGTVPLEMTQTQIFEAIQGDLLASSLWINIALAGLSILLFVYMGRN---LEDPR
AQLIFVATLMVPLVSISSYTGTVSGLTFSFLEMPAGHALAG-----QEVLPWGRYLTWALSTPMILVALGLLA-----GSN
ATKLFTAVIDIGMVCVTGLAAALTTT-----SYLLRWVWYVISCFAFFVVVLYVLLAEWAEDA---EVAGTAEIFNTLKLTVVLW-
LGYPIFWALGAEG-LAVL-DVAVTSWAYSGMDIVAKYLFALLLRWVVDNERTVAGMAAGLGAPL-ARCAPADD-----
-----</seq-data>
</sequence>
<sequence seq-type="Protein">
<seq-name>BACH_HALHM</seq-name>
<seq-info><length>387</length></seq-info>
<seq-data>-----IALAGLSILLFVYMGRN---VEDPRAQLIFVATLMVPLVSISSY
TGLVSGLTVGFLEMPAGHALAGMGAGPE---GGVFTPWGRYLTWAFSTPMILIALGLLA-----GSNMSKLTAVVADVG
MCITGLAAALTTT-----SYLLRWVWYGISCAFFVVVLYILLAEWAKDA---EVAGTADIFNTLKVLTVVLW-LGYPIFWALGAE
G-LAVL-DIAITSWAYSGM-----</seq-d
ata>
</sequence>
<sequence seq-type="Protein">
<seq-name>BACH_NATPH</seq-name>
<seq-info><length>387</length></seq-info>
<seq-data>-----MTETLPPVTESAVALQAEVTQRELFVFLNDPLLASSLYINIALAGLSILLFVFMTRG---LDDPRAK
LIAVSTILVPVVSIASTYGLASGLTISVLEMPAGHFAEGSSVMLGGEEVDGVVMTMWGRYLTWALSTPMILLALGLLA-----G
SNATKLFTAIFDIAMCVTGLAAALTTT-----SHLMRWFWYAISCACFLVVLYILLVEWAQDA---KAAGTADMFNNTLKLTV
VMW-LGYPIVWALGVEG-IAVL-PVGVTSWGYSFLDIVAKYIFALLLNLYLTSNESVVS--SILDVPS-ASGTPADD-----
-----</seq-data>
</sequence>
<sequence seq-type="Protein">
<seq-name>BACH_HALSP</seq-name>
<seq-info><length>387</length></seq-info>
<seq-data>-----MSITVPGVVDAGVLGAQSAAVRENALLSSSLWVNVVALAGIAILFVYMGRG---IRPGRP
RLIWGATLMIPVSISSYLGLLSGLTVGMIEMPAGHALAG-----EMVRSQWGRYLTWALSTPMILLALGLLA-----DVD
LGSLFTVIAADIGMVCVTGLAAAMTTT-----ALLFRWAFYAISCAFFVVVLSALVTDWAASA---SSAGTAEIFDTRLVLTVVLW-
LGYPIVWAVGVEG-LALVQSVGVTSWAYSVLDVFAKYVFAFILLRWVANNERTVAVAGQTLGT-----MSSDD-----
-----</seq-data>
</sequence>
<sequence seq-type="Protein">
<seq-name>O93741</seq-name>
<seq-info><length>387</length></seq-info>
<seq-data>MRSRTYHDQSVCGPYGSQRTDCDRD TDAGSDTDVHGAQVATQIRTD TLLHSSLWVNI ALAGLSILVFLYMA
RT---VRANRARLIVGATLMIPVSLSSYLGLVTGLTAGPIEMPAAHALAG-----EDVLSQWGRYLTWTLSTPMILLALGW
LA-----EVDTADLFVVIADIGMCLTGLAAALTTT-----SYAFRWAFYLVSTAFFVVVLYALLAKWPTNA---EAAGTGDFGT
LRWLTVILW-LGYPIVWALGVEG-FALVDSVGLTSWGYSLLDIGAKYLFALLLRWVANNERTI AVGQRSGRGAIGDPVED--
-----</seq-data>
```

</sequence>  
<sequence seq-type="Protein">  
<seq-name>BACT\_HALVA</seq-name>  
<seq-info><length>387</length></seq-info>  
<seq-data>-----MATITTWFTLGLLGELLGTAVLAYGYT----LVPEETRKRYLLIIAIPGIAI  
VAYALMALGFGSIQS-----EGHAVYVRYVDWLLTTPLNWVFLALLA-----GASREDTVKLVVLQALTIVFGF  
AGAVTPS-----PVSYALFAVGGALFGGVIYLLYRNIAVAAKSTLSDIEVSLYRTLRFVVLW-LVYPVVWLLGAAG-VGLM-  
DVETATLVVYLDVVTKVGFVIALLAMIDLGSAGETAEEPTAVAGD-----  
-----</seq-data>

</sequence>  
<sequence seq-type="Protein">  
<seq-name>BACT\_NATPH</seq-name>  
<seq-info><length>387</length></seq-info>  
<seq-data>-----MVGLTTLFWLGAIGMLVGTAFAWAGR----DAGSGERRYVTLVGI  
SGIAAVAYVVMALGVGWVPV-----AERTVFAPRYIDWILTTP LIVYFLGLLA-----GLDSREFGIVITLNTVVML  
AGFAGAMVPG-----IERYALFGMGAVAFLGLVYLVGPMTESASQ-RSSGIKSLYVRLRNLTVILW-AIYPFIWLLGPPG-VA  
LL-TPTVDVALIVYLDLVTKVGFVIALDAAATLRAEHGESLAGVDTDAPAVAD-----  
-----</seq-data>

</sequence>  
<sequence seq-type="Protein">  
<seq-name>BACT\_HALSA</seq-name>  
<seq-info><length>387</length></seq-info>  
<seq-data>-----MALTTFWVVGAVGMLAGTVLPIRDC----IRHPSHRRYDLVLGIT  
GLAAIAYTTMGLGITATTV-----GDRTVYLARYIDWLVTTP LIVLYLAML A-----RPGHRSAWLLAADVFVIA  
AGIAAALTG-----VQRWLFFAVGAAGYAALLYGLLGTLPALG--DDPRVRSFVTLRNITVVLW-TLYPVVWLLSPAG-IGI  
L-QTEMYTIVVVYLDV FISKVAFVAVLGADAVSRLVAADAAAPATAEPTPDGD-----  
-----</seq-data>

</sequence>  
<sequence seq-type="Protein">  
<seq-name>BACS\_HALHA</seq-name>  
<seq-info><length>387</length></seq-info>  
<seq-data>-----MDAVATAYLGGAVLIVGVAFVWLLYRS---LDGSPHQSA LAPLA IIP  
VFAGLSYVGMAYDIGTVIV-----NGNQIVGLRYIDWLVTTPILVGYVGYAA-----GASRRSIIGVMVADALMIA  
VGAGAVVTDG-----TLKWALFGVSSIFHLSLFAYLYVIFPRVVP--DVPEQIGLFNLLKNHIGLLW-LAYPLVWLF GPAG-IGE  
A-TAAGVALTYVFLDVLAKVPYVYFFYARRRVFMHSESPPAPEQATVEATAAD-----  
-----</seq-data>

</sequence>  
<sequence seq-type="Protein">  
<seq-name>BAC3\_HALVA</seq-name>  
<seq-info><length>387</length></seq-info>  
<seq-data>-----MDAVAVVYGITAAGFAVGVAIVGYLYAS---LEGSEERSILAALALIPGF  
AGISYVAMAFGIGTVTI-----GETTLVGFRLDWVVTTPLLVGFVGYAA-----GASRRAIFGVMVADALMILT

```
GVGAVVADG-----TLKWVLFVSTVHFVSLFAYLYLVFPRSVP--DDPQRIGLFSLLKNHIGLLW-IAYPLVWLAGPEG-LGL
A-TYVGVSITYAFDLLAKVPYVYFFYARRQVFATKLLRDSGEVTATPAD-----
-----</seq-data>
</sequence>
<sequence seq-type="Protein">
<seq-name>O93743</seq-name>
<seq-info><length>387</length></seq-info>
<seq-data>-----MTGAVTSAYWLAAVAFLIGVGITAALYAK---LEGSRARTRLAALAVIP
GFAGLSYVGMALGIGTVTV-----NGAELVGLRYVDWVVTPLLVGFIGYNA-----GASRRAIAGVMIADALMI
VFGAAAVVSGG-----TLKWALFGVSALFHVSLFAYLYVIFPGGIP--DDPMQRGLFSLLKNHVGLLW-LAYPFVWLMGPAG
-IGFT-GAVGAALTYAFLDVLAKVPYVYFFYARRQAFIDVTDSRAAAKGDGPAVGGGEAPVATGDDAPTAAD-----
-----</seq-data>
</sequence>
<sequence seq-type="Protein">
<seq-name>BACS_HALSS</seq-name>
<seq-info><length>387</length></seq-info>
<seq-data>-----MTGAVSAAYWIAAVAFLVGLGITAALYAK---LGESEDRGRLAALAVIP
GFAGLAYAGMALGIGTVTV-----NGAELVGLRYVDWIVTTPLLVGFIGYVA-----GASRRAIAGVMLADALMI
AFGAGAVVTGG-----TLKWVLFVSSIFHVTLFAYLYVVFPRAVP--DDPMQRGLFSLLKNHVGLLW-LAYPFVWLMGPA
G-IGFT-TGVGAALTYAFLDVLAKVPYVYFFYARRQAFIDVVSAAATADREDATDAVGDGAPTAAD-----
-----</seq-data>
</sequence>
<sequence seq-type="Protein">
<seq-name>BACR_HALHA</seq-name>
<seq-info><length>387</length></seq-info>
<seq-data>-----MLELLPTAVEGVSQAQITGRPEWIWLALGTALMGLGTLYFLVKGMG---VSDPDAKK
FYAITTLVPAIAFTMYLSMLLGYGLTMVPPGG-----EQNPIYWARYADWLFTTPLLLLDLALLV-----DADQGTLA
LVGADGIMIGTGLVGALTKV-----YSYRFVWWAISTAAMLYILYVLFPGFTSKAES-MRPEVASTFKVLRNVTVVLW-SAYPV
VWLIGSEG-AGIV-PLNIETLLFMVLDVSAKVGFGILLRSRAIFGEAEAPEPSAG-DGAAATSD-----
-----</seq-data>
</sequence>
<sequence seq-type="Protein">
<seq-name>BAC3_HALSD</seq-name>
<seq-info><length>387</length></seq-info>
<seq-data>-----MDPIALQAGYDLLGDGRPETLWLGIGTLLMLIGTFYFLVRGWG---VTDKDAREYY
AVTILVPGIASAAYLSMFFGIGLTEVTVGG-----EMLDIYARYADWLFTTPLLLLDLALLA-----KVDRVTIGTLVG
VDALMIVTGLIGALSHT-----AIARYSWWLFSTICMIVVLYFLATSLRSAAKE-RGPEVASTFNTLTALVVLW-TAYPILWIIG
TEG-AGVV-GLGIETLLFMVLDVTAKVGFILLRSRAILGDTEAPEPSAGADVSAAD-----
-----</seq-data>
</sequence>
<sequence seq-type="Protein">
<seq-name>BAC1_HALS1</seq-name>
```

```
<seq-info><length>387</length></seq-info>
<seq-data>-----MDPIALTAAVGADLLGDGRPETLWLGIGTLLMLIGTFYFIVKGGW---VTDKEAREYY
SITILVPGIASAAYLSMFFGIGLTEVQVGS-----EMLDIYYARYADWLFTTPLLLLDLALLA-----KVDRVSI
GTLVGV
DALMIVTGLVGALSHT-----PLARYTWWLFFSTICMIVVLYFLATSLRAAAKE-RGPEVASTFNTLTALV
LVLW-TAYPILWIIG
TEG-AGVV-GLGIETLLFMVLDVTAKVGFVFILLRSRILGDTEAPEPSAGAEASAAD-----
-----</seq-data>
</sequence>
<sequence seq-type="Protein">
<seq-name>BAC2_HALS2</seq-name>
<seq-info><length>387</length></seq-info>
<seq-data>-----MDPIALQAGFDLLNDGRPETLWLGIGTLLMLIGTFYFIARGWG---VTDKEAREYYA
ITILVPGIASAAYLAMFFGIGVTEVELASG-----TVLDIYYARYADWLFTTPLLLLDLALLA-----KVDR
VTIGTLIGVDA
LMIVTGLIGALSHT-----PLARYTWWLFFSTIAFLVLYLLTSLRSAAAK-RSEEVSTFNTLTALVAVLW-
TAYPILWIVGTEG-
AGVV-GLGIETLAFMVDVTAKVGFVLLRSRILGETEPEPSAGADASAAD-----
-----</seq-data>
</sequence>
<sequence seq-type="Protein">
<seq-name>BACR_HALHM</seq-name>
<seq-info><length>387</length></seq-info>
<seq-data>-----GIGTLLMLIGTFYFIARGWG---VTDKKAREYYAITILVPGIASAA
YLSMFFGIGLTTVEVAGMA-----EPLIYYARYADWLFTTPLLLLDLALLA-----NADRTTIGTLIGV
DALMIVTGLIGA
LSHT-----PLARYTWWLFFSTIAFLVLYLLTVLRSAAAE-LSEDEVQTTFNTLTALVAVLW-TAYPILW
IIGTEG-AGVV-GLGVE
TLAFMVDVTA-----</seq-data>
</sequence>
<sequence seq-type="Protein">
<seq-name>BACR_HALAR</seq-name>
<seq-info><length>387</length></seq-info>
<seq-data>-----MPEPGSEAIWLWLGTAGMFLGMLYFIARGWG---ETDSRRQKFYIATIL
ITAIAFVNYLAMALGFGLTIVEFAG-----EEHPIYWARYSDWLFTTPLLLYDLGLLA-----GADRNTIT
SLVSLDVL
MIGTG
LVATLSAGSGVLSAGAERLVWWGISTAFLLVLLYFLFSSLSGRVAD-LPSDTRSTFKTLRNLVTVVW-LVY
PVWWLIGT
EG-IGLV-GIGIETAGFMVIDLTAKVGFGIILLRSHGVLDGAAETTGTGATPADD-----
-----</seq-data>
</sequence>
<sequence seq-type="Protein">
<seq-name>BACR_HALHP</seq-name>
<seq-info><length>387</length></seq-info>
<seq-data>-----IWLWLGTAGMFLGMLYFIARGWG---ETDSRRQKFYIATILITAIA
FVNYLAMALGFGLTIVEFAG-----EEHPIYWARYSDWLFTTPLLLYDLGLLA-----GADRNTITSLV
SLDVL
MIGTG
LVATLSAGSGVLSAGAERLVWWGISTAFLLVLLYFLFSSLSGRVAD-LPSDTRSTFKTLRNLVTVVW-LVY
PVWWLIGTEG-IG
LV-GIGIETAGFMVIDLTA-----</seq-data>
>
</sequence>
```



<sequence seq-type="Protein">  
<seq-name>BACR\_HALVA</seq-name>  
<seq-info><length>387</length></seq-info>  
<seq-data>-----MPAPEGEAIWLWLGTAGMFLGMLYFIARGWG---ETDSRRQKFYIATIL  
ITAIAFVNYLAMALGFGLTIVEIAG-----EQRPIYWARYSDWLFTTPLLLYDLGLLA-----GADRNTISSLVSLDVLMI  
GTGLVATLSAGSGVLSAGAERLVWWGISTAFLLVLLYFLFSSLSGRVAD-LPSDTRSTFKTLRNLVTVVW-LVYPVWWLVGT  
EG-IGLV-GIGIETAGFMVIDLVAKVGFGIILLRSHGVLDGAAETTGAATATAD-----  
-----</seq-data>

</sequence>

<sequence seq-type="Protein">  
<seq-name>BACR\_HALHS</seq-name>  
<seq-info><length>387</length></seq-info>  
<seq-data>-----LWLGTAGMFLGMLYFIARGWG---ETDGRRQKFYIATILITAIAF  
VNYLAMALGFGLTFIEFGG-----EQHPIYWARYTDWLFTTPLLLYDLGLLA-----GADRNTIYSLVSLDVLMI  
GTVATLSAGSGVLSAGAERLVWWGISTAFLLVLLYFLFSSLSGRVAN-LPSDTRSTFKTLRNLVTVVW-LVYPVWWLVGSEG-L  
GLV-GIGIETAGFMVIDLVA-----</seq-dat

a>

</sequence>

<sequence seq-type="Protein">  
<seq-name>BACR\_HALSR</seq-name>  
<seq-info><length>387</length></seq-info>  
<seq-data>-----MLQSGMSTYVPGGESIFLWVG TAGMFLGMLYFIARGWS---VSDQRRQKFYI  
ATIMIAAIAFVNYLSMALGFGVT TIELGG-----EERAIYWARYTDWLFTTPLLLYDLALLA-----GADRNTIYSLVGL  
DVLMI  
GALATLSAGSGVLPAGAERLVWWGISTGFLVLLYFLFNSLTD RASE-LSGD LQSKFSTLRNLV LVLW-LVYPVLW  
LVGTEG-LGLV-GLPIETA AFMVLDTAKIGFGIILLQSHAVLDEGQTAS-EGA AVAD-----

-----</seq-data>

</sequence>

<sequence seq-type="Protein">  
<seq-name>O93740</seq-name>  
<seq-info><length>387</length></seq-info>  
<seq-data>-----MCCAALAPPMAATVGPESIWLWIGTIGMTLGTLYFVGRGRG---VRDRKMQEF  
YIITIFITIAAAMYFAMATGFGVTEVMVGD-----EALTIYWARYADWLFTTPLLLLDLSLLA-----GANRNTIATLI  
GLDVMIGTGAIAALSST-----PGTRIAWWAISTGALLALLYVLVGTLS ENARN-RAPEVASLFGRLRNLVIALW-FLYPV VWI  
LGTEGTFGIL-PLYWETA AFMVLDSAKVGFVILLQSRSVLERVATPTAAPT-----

-----</seq-data>

</sequence>

<sequence seq-type="Protein">  
<seq-name>F123\_CORVE</seq-name>  
<seq-info><length>387</length></seq-info>  
<seq-data>-----MGNSALDLNPP-NATFHLSTHGSDWLWAAFSVFGVSLLT VVAWTF----TRPRGARL  
FHQIAIVLTTGSLAYFSMASDLGATPVPVEFRGE-----GTRQIWFVRYIQWFITP LLLLLELLLAT-----GLSLSDIF TLL  
FMSIVLVITGLVAALVPS-----TYKWGYTFGVSALFYIWYVLLWHGPH TTFA-AGGVLRRGYILAAGYLSFLL-LLYPIAWAC

-AEG-GNVI-SVTSEMIWYGILDIFAGPIFLFFFLWELRGVDYATFGLHSGKYTDKSAYAPNTAQAAGTVPATTSTGAAGNV-  
-----</seq-data>  
</sequence>  
<sequence seq-type="Protein">  
<seq-name>YRO2\_YEAST</seq-name>  
<seq-info><length>387</length></seq-info>  
<seq-data>-----MSDYVELLKRGGNEAIKINPPTGADFHITSRGSDWLFVFCVNULLFGVILVPLMF----RKPVKD  
RFVYYTAIAPNLFMSIAYFTMASNLGWIPVRAKYNHVQTSTQ----KEHPGYRQIFYARYVGVWFLAFPWPPIIQMSLLG-----  
GTPLWQIAFNVMTEIFTVCWLIAACVHS-----TYKWGYTIGIGAAIVVCISLMTTTFNLVKA-RGKDVSNVFITFMSVIM  
FLWLIAYPTCFGI-TDG-GNVL-QPDSATIFYGIIDLLLSILPVLFMPLANYLGIERLGLIFDEEPAEHVGPVAEKKMPSPASFKS  
SDSDSSIKEKLLKLLKHHKDKKKAKKAKKAKKAKKAQEEEEEDVATDSE</seq-data>  
</sequence>  
<sequence seq-type="Protein">  
<seq-name>YD33\_YEAST</seq-name>  
<seq-info><length>387</length></seq-info>  
<seq-data>-----MSTFETLIKRRGGNEAIKINPPTGADFHITSRGSDWFWTCFCCYLLFGLLITFLMF----RKPVNDR  
FFYLTGIAPNFFMCIAYFTMASNLGWIPVAKYNHVQTSTQ----KEHPGYRQIFYSRFVGVWFLALPWPIIQICMLA-----GT  
PFWQMAFNVCITEFFTVCWLIAACVHS-----TYKWGYTIGLGAIVVSISVMTTSYNLVKQ-RDNDIRLTLVFFSIIIMFL  
WIIAYPTCFGI-TDG-GNVL-QPDSAGIFYGIIDLILMCFIPTLLVPIANHFGADKLGYPHFGPSDAEAVMAPKAPVASPRPAAT  
PNLSKDKKKKSKKSKKSKKSEE-----</seq-data>  
</sequence>  
<sequence seq-type="Protein">  
<seq-name>HS30\_YEAST</seq-name>  
<seq-info><length>387</length></seq-info>  
<seq-data>-----MNDTLSSFLNRNEALGLNPPHGLDMHITKRGSDWLWAVFAVFGFILLCYVVMFFIAENKGS  
RLTRYALAPAFLITFFEFFAFFTYASDLGWTVQAEFNHVKVSITS--GEVPGIRQIFYSKYIAWFLSWPCLLFLIELAASTTGE  
NDDISALDMVHSLLIQIVGTLFWVVSLLVGS---LIKSTYKWGYTIGAVAMLVTQGVICQRQFF-----NLKTRGFNALMLCT  
CMVIVWLYFICWGL-SDG-GNRI-QPDGEAIFYGVLDLCVFAIYPCYLLIAVSRDGKLPRLSLTGGFSSHHTDDVEDAAPET  
KEAVPESPRASGETAIHEPEPEAEQAVEDTA-----</seq-data>  
</sequence>  
<sequence seq-type="Protein">  
<seq-name>O74870</seq-name>  
<seq-info><length>387</length></seq-info>  
<seq-data>-----MNAKLSSSGMVLKELPEVALQKISSNYYWAVFAVFLCAIVFPLVSIF---SLPQKQTYHR  
FFSILS-LVSCLAYFTMACNYGLKNVFSASFFREV-----SVRMVYYVRYIQWLINFLIIVMLHWTV-----GVSILEIAYVV  
CYVLFIVCLLAAALTSS-----PYKWAYYGFSFVGYFIALAHSVVLHKKYASR-LETSARLGFLWSIVYLHVIW-FLYYACWIL-S  
EG-LNVI-SPIGEAIFYSILDLEFGFFGAAFSWMLDLVGIENFKSPQSIPLGACSPADDKFSMCPDMEAQNQADDLAVETRI  
QISNLPSSPTKNNC-----</seq-data>  
</sequence>  
<sequence seq-type="Protein">  
<seq-name>Q9UW81</seq-name>  
<seq-info><length>387</length></seq-info>



QGDKVILVK-----</seq-data>  
</sequence>  
<sequence seq-type="Protein">  
<seq-name>Q53922</seq-name>  
<seq-info><length>1088</length></seq-info>  
<seq-data>-----MKNLLKKFF  
GQLQRIGKALMLPVAILPAAGILLTFGNAMHNEQILHF----APWMQHHYIQLISQIMEASGQVIFDN---LPLLFAMGTALG  
LAGG----DGVAGIAALVGYLIM---SATMGKIAGITIDDFSYADGAKL-----GQSAKDPahalVLGIP----TLQTGVFGGIII  
GALAAWCYNKFYNIQLPQFLGFFAG---KRFVPIITSL-VAIVTGIVLSFVWPPVQDGLNNSNLL----GKNLALTTFFIGIERS  
LIPFGLHHIFYPFWFEFGHYVNES-----GNLVRGDQRIWMAQYQDGVPF-----  
-----TAGAFTTGKYPFMMFGL  
L-PAAAFAIYPQAKPERRKVVGGMLLSAALTSFLTGITEPLEFSFLVAPILYV-AHVILAGTSFLIMHLLH----VQIGMTFS-GG  
FIDYILYGLLSW---DRSNALLVIPVGIAYALIYYFLFTFLIKKLNKTPGREDKEVESKDVSVS-----ELPFEV  
LEAMGNKDNIKHLDACITRLRVEVRDKGLVDVE-KLKQLGASGVLEVGN-NMQAIFGPKSDQIKHDMQQIMDGKITS-----  
----PAETTVTEDGDVETAIEVAEGGAVIYAPITGEAVDLSEVPDKVFSAKMMGDGIAIKPETGEVVAPFD-GKVK-MIFPTKH  
AIGLESKDGIELLIHFGLTVKLDGEG-----FEILVKENDNIVLG-QPLMKVDLNYIKEHADDITPIIITNAGSANIEVLHT---G  
KVEQGEKLLLVNN-----</seq-data>

</sequence>  
<sequence seq-type="Protein">  
<seq-name>PTGA\_BACSU</seq-name>  
<seq-info><length>1088</length></seq-info>  
<seq-data>-----MFKALFG  
VLQKIGRALMLPVAILPAAGILLAIGNAMQNKDMIQV----LHFLSNDNVQLVAGVMESAGQIVFDN---LPLLFAVGVAIGL  
ANG----DGVAGIAAIIGYLVN---NVSMSAVLLANGTIPSDSVERAKF-----FTENHPAYVNMLGIP----TLATGVFGGIIV  
GVLAALLFNRFYTIELPQYLGFFAG---KRFVPIVTSI-SALILGLIMLVIWPPIQHGLNAFSTGLV----EANPTLAAFIFGVIERSLI  
PFGLHHIFYSPFWYEFFSYKSAA-----GEIIRGDQRIFMAQIKDGVQL-----  
-----TAGTFMTGKYPFMMFGL-PA  
AALAIYHEAKPQNKKLVAGIMGSAALTSFLTGITEPLEFSFLVAPVLFA-IHCLFAGLSFMVMQLLN----VKIGMTFS-GGLI  
DYFLFGILP----NRTAWWLVIPVGLGLAVIYYFGFRFAIRKFNKTPGREDAEETAAPGKTGEAG-----DLP  
YEILQAMGDQENIKHLDACITRLRVTVNDQKKVDKD-RLKQLGASGVLEVGN-NNIQAIFGPRSDGLKTQMMDIAGRKPRP  
EP---KTSAQEEVGQQVEEVIAEPLQNEIGEEVFPITGEIHPITDVPDQVFSGKMMGDGFAILPSEGIVVSPVR-GKIL-NVF  
PTKHAIGLQSDGGREILIHFGIDTVSLKGE-----FTSFVSEGDRVEPG-QKLEVDLDAVKPNVPSLMTPIVFTNLAEGETV  
SIKAS--GSVNREQEDIVKIEK-----</seq-data>

</sequence>  
<sequence seq-type="Protein">  
<seq-name>YBFS\_BACSU</seq-name>  
<seq-info><length>1088</length></seq-info>  
<seq-data>-----MFKKAFQI  
LQQLGRALMTPVAVLPAAGLLLRFGDKDLL-----NIPIKDAGGVVFDN---LPLIFAVGVAIGLAGG----EGVA  
GLAAVIGYLIL---TVTLDNMG-----KLLGLQPPYEG-AEH----LIDMGVFGGIIIIGLLAAYLYKRFSSIELHPVL  
GFFSG---KRFVPIITSV-SSLVIGVIFSFVWPLIQNGINAASSL-----IADSTVGLFFYATIYRLLIPFGLHHIFYTPFYFMMGEYTD  
PST-----GNTVTGDLTRFFAGDP-----

-----TAGRFMMGDFPYMIFCL-PAVALAIIHTARPEKKKMISGVMIS  
AALTSMLTGITEPVEFSFLFVAPVLYL-INSILAGVIFVVCDFH----VRHGYTFS-GGGIDYVLNYGL-----STNGWVVIPVGIV  
FAFIYYLFRFAILKWNLKTPGRETDEDGQNEEKAPVAKD-----QLAFHVLQALGGQQNIANLDACITRLR  
VTVHQPSQVCKD-ELKRLGAVGVLEVN-NNFQAIFGTKSDALKDDIKTIMAGGV-----PATAAALDVTVDKPLKPD  
DETFIYPIKGETVSLGDVPDQVFSEKMMGEGFAIPSEGKVVAPAD-GEIV-SIFPTKHAIGFMSAGGTEILHVGIDTVKLN  
GE-----FEAHVTSGQAVKQG-ELLLTFDLNYIKQHAASAITPVIFTNTSEEDLKHIQMK-----</seq-da  
ta>

</sequence>

<sequence seq-type="Protein">

<seq-name>PTGB\_ECOLI</seq-name>

<seq-info><length>1088</length></seq-info>

<seq-data>-----MFKNAFA  
NLQKVGKSLMLPVSVLPIAGILLGVGSANFSW-----LPAVVSHVMAEAGGSVFAN---MPLIFAIGVALGFTNN----  
DGVSALAAVVAYGIM---VKTMAVVA-----PLVLHLPAAEEIASKH----LADTGVLGGIISGAIAAYMFNRFY  
RIKLPEYLGFFAG---KRFVPIISGL-AAIFTGVVLSFIWPPIGSAIQTFSQWAA---YQNPVVAFGIYGFIERCLVPFGLH  
HIWNV  
PFQMQIGEYTNA-----GQVFHGDIPRYMAGDP-----  
-----TAGK-LSGGFLFKMYGL-PAAAIWHSAP  
ENRAKVGIMISAALTSFLTGITEPIEFSFMFVAPILYI-IHAILAGLAFPICILLG----MRDGTSFS-HGLIDFIVLSGN-----SSKL  
WLFPIVIGIYAIVYYTIFRVLKALDLKTPGREDATEDAKATGTS-----EMAPALVAAFVGGKENITNLDA  
CITRLRVSADVSKVDQA-GLKKLGAAGVVVAG-SGVQAIFGTKSDNLKTEMDEYIRNH-----

-----</seq-data>

</sequence>

<sequence seq-type="Protein">

<seq-name>PTGB\_SALTY</seq-name>

<seq-info><length>1088</length></seq-info>

<seq-data>-----MFKNAFA  
NLQKVGKSLMLPVSVLPIAGILLGVGSANFSW-----LPAVVSHVMAEAGGSVFAN---MPLIFAIGVALGFTNN----  
DGVSALAAVVAYGIM---VKTMAVVA-----PLVLHLPAAEEIAAKH----LADTGVLGGIISGAIAAYMFNRFY  
RIKLPEYLGFFAG---KRFVPIISGL-AAIFTGVVLSFVWPPIGTAIQAFSQA---YQNPVVAFGIYGFIERCLVPFGLH  
HIWN  
VPSQMQIGEYTNA-----GQVFHGDIPRYMAGDP-----  
-----TAGM-LSGGFLFKMYGL-PAAAIWHSAP  
PENRAKVGIMISAALTSFLTGITEPIEFSFMFVAPILYI-IHAILAGLAFPICILLG----MRDGTSFS-HGLIDFIVLSGN-----SSK  
LWLFPIVIGAGYAIVYYTVFRVLKAFDLKTPGREDTTDDAKAGATS-----EMAPALVAAFVGGKENITNL  
DACITRLRVSADVAKVDQA-GLKKLGAAGVVVAG-SGVQAIFGTKSDNLKTEMDEYIRNH-----

-----</seq-data>

</sequence>

<sequence seq-type="Protein">

<seq-name>O32444</seq-name>

<seq-info><length>1088</length></seq-info>

<seq-data>-----

--MLPIATLPVAALLRLGQPDLL-----GIPFMAAAGDAIFSQ---LPLLFGLGIAIGLSKDG----SGAAGLAGAVAY  
FVL---TATAKTID-----A----SINMSFFGGIFAGIAGHSYNAFHATRLPEWLAFFAG---KRLVPI  
MAGL-FALVAGALSGVIWPSIQGGLDALAHAV----STSGALGQFVYGTNLRALIPVGLHHVLNSYFWFGMGTCQEILVSG  
AQAAGQALPALEKLCVDPALAKTLVVGQEHTFAFKNAVTPAITAVVKEVT-EVVKSGDLHRFFGGDK-----  
-----SAGVFMNGFFPVMMFGL-PGAALA  
MYLAAPAERRHQVGGALFSVAFCSFLTGITPLEFMFVFLAPALYA-MHAVFTGLSLVVANMFG-----TLHGFGFS-AGLIDF  
LLNWGL-----ATKPATLFVIGLAFFALYFFTTFAIRAFNLKSPGREDEEVETETDSADASKG-----DLARQYL  
KALGGHENLTSIDACITRLRLTLKDRSVADEA-VLKKLGAKGVVKLGENNLQVILGPLAEIVAGEMKAISPKEDLSDVKLP-----  
-----</seq-data>

</sequence>

<sequence seq-type="Protein">

<seq-name>O34521</seq-name>

<seq-info><length>1088</length></seq-info>

<seq-data>-----MLSFL  
QKLGKSFMLPIAVLPVAVGIIALGREDVF-----NIPFVYQAGTAVFDH---LPLIFAIGIAIGISKDS---NGAAGLS  
GAISYMLM---DAATKTID-----K----TNNMAVFGGIIAGLIAGYTYNRFKDTKLPEYLGFFSG---  
RRLVPILTAI-ITIILAGIFGVVWPPIQSCINSFGEWM----LGLGGIGAGIFGLFNRLLIPLGLHHVLNNIFWFQFGEYN-----  
-----GVTGDLARFFAKDP-----  
-----TAGTYMTGFFPIMMFGL-PAACLAMVVTAKPSKRKATAGMMIGFALTA  
FITGITEPIEFAMFLSPLLYA-VHAVLTGLSLFIVNWLG----IRSGFSFS-AGAIDYVLSYGI-----AEKPLLLLGVICYAAVYFIV  
FYVLIKALNLKTPGREDDVDVLDENTVQD-----VNENIMLKGLGGKENLQTDHCATRLRLTVKDTAL  
VDEA-LLKKAGAKGVVKSQSVQVIIGPNVEFAAEELRAAVK-----

----</seq-data>

</sequence>

<sequence seq-type="Protein">

<seq-name>PTAA\_ECOLI</seq-name>

<seq-info><length>1088</length></seq-info>

<seq-data>-----MNILGFF  
QRLGRALQLPIAVLPVAALLRFGQPDLL-----NVAFIAQAGGAIFDN---LALIFAIGVASSWSKDS----AGAAA  
LAGAVGYFVL---TKAMVTIN-----P----EINMGVLAGIITGLVGGAAYNRWSDIKLPDFLSFFG  
G---KRFVPIATGF-FCLVLAAIFGYVWPPVQHAIHAGGEWI----VSAGALGSGIFGFINRLLIPTGLHQLVNTIAWFQIGEFT  
NAA-----GTVFHGDINRFYAGDG-----  
-----TAGMFMMSGFFPIMMFGL-PGAALAMYFAAPKERRPMVGG  
MLLSVAVTAFLTGVTEPLEFLFMFLAPLLYL-LHALLTGISLFVATLLG----IHAGFSFS-AGAIDYALMYNLP---AASQNVWM  
LLVMGVIFFAIYFVVFSLVIRMFNLKTPGREDKEDIIVTEEANSNTEEGLT-----QLATNYIAAVGGTDNLKAID  
ACITRLRLTVADSARVNDT-MCKRLGASGVVKNKQTIQVIVGAKAESIGDAMKKVVARGPVAAASAEAT-----PATAAPV  
AKPQAVPNAVSIAELVSPITGDVVALDQVPDEAFASKAVGDGVAVKPTDKIVVSPAA-GTIV-KIFNTNHAFCLTEKGAIEV  
VHMGIDTVALEGKG-----FKRLVEEGAQVSAG-QPILEMDLDYLNANARSMISPVVCSNIDDFSGLIKAQ--GHIVAGQTP  
LYEIKK-----</seq-data>

</sequence>

<sequence seq-type="Protein">  
<seq-name>PTAA\_KLEPN</seq-name>  
<seq-info><length>1088</length></seq-info>  
<seq-data>-----MNILGFF  
QRLGRALQLPIAVLPVAALLLRFGQPDLL-----NVPFIAQAGGAIFDN---LALIFAIGVASSWSKDN---AGSAA  
LAGAVGYFVM---TKAMVTIN-----P----EINMGVLAGIITGLVAGAVYNRWAGIKLPDFLSFF  
GG---KRFVPIATGF-FCLILAAIFGYVWPPVQHAIHSGGEWI----VSAGALGSGIFGFINRLLIPTGLHQVLNTIAWFQIGFT  
NAA-----GTVFHGDINRFYAGDG-----  
-----TAGMFMSGFFPIMMFGL-PGAALAMYLAAPKARRPMVGG  
MLLSVAITAFALTGVTEPLEFLFLAPLLYL-LHAVLTGISLFIATALG----IHAGFSFS-AGAIDYVLMYSLP---AASKNVWMLL  
VMGVVFFFVYFLLFSAVIRMFNLKTPGREDKAADVTEANSNTEEGT-----QLATSYIAAVGGTDNLKAID  
ACITRLRLTVGDSAKVNDA-ACKRLGASGVVKNKQTIQVIVGAKAESIGDEMKKVTRGPVAAAAAAPA----GNVATAAP  
AAKPQAVANAKTVESLVSPITGDVVVALEQVPDEAFASKAVGDGIAVKPTDNIVVAPAA-GTVV-KIFNTNHAFCLTNGA  
EIVVHMGIDTVALEGKG-----FKRLVEEGTDVKAG-EPILEMDLDFLNANARSMISPVVCSNSDDYSALVILAS--GKVVAG  
QTPLYEIKGK-----</seq-data>  
</sequence>

<sequence seq-type="Protein">  
<seq-name>O51000</seq-name>  
<seq-info><length>1088</length></seq-info>  
<seq-data>-----MSTSSASISIFTI  
LQKIGKAFMLPIALLPAAGILLGIGGAFTNETMIQAYGLEEVLGKGTVANSILYLMKYTGEVIFAN---LPLMFAAAIPIGLAKV  
E----KGTAALAGVVGFLVM---HQTINGILYIQGITPESASLKALLELGMETA-ATAKSQEYTSVLGIF-----SLQMSVMGGLIA  
GFVAVFLHNRFHNIQLPTFLAFFGG---TRFVPIVTTM-AMFVVGIFLTFIWPFIQGAMTSFGRIV----EQSGLFGTFAYGAIK  
RSLIPFGLHHIFYLPFWQTAVGGTLEIN-----NELISGAQNIFFKQLADPNTVHFE  
VA-----KGTRFFSGEFVVMIF  
GL-PGAALAMYHTSKPENKKNVASLLSASFTSMLTGITEPLEFAFLFAAPALYYFIYVPLFGLAYLLTHLLN----VGVGLTFS-  
GGFIDMFLGILQGN--SKTNWIAIPILGIFYFIGFYFIFKFAIMKFNLTIGREDEEMEKTMMMSSEKTSLS-----  
ETASKVLEGLGGKDNITYIDACASRLRVNLKQIEVIKSDAYFKNLGASGILKKG-NSVQIVFGGLSDNIKMEIDKLM-----  
-----</seq-data>

</sequence>  
<sequence seq-type="Protein">  
<seq-name>O51590</seq-name>  
<seq-info><length>1088</length></seq-info>  
<seq-data>-----MLKGFEQ  
AQKFGRSFMPLPIAILPAAGLLLIGGSLSNPETVRT----YSFLNIFFLQSVFKIMSASGSIIFSN---LAPIFSIGIAVGLAKSD----K  
GTSGIAAFIGYLVN---NATIGVLIDVSGRA-----ESFSSGAVGFVLGIK-----TLETGVFGGVVVGILTYLHRSFNK  
VDLPKVLGFFSG---SRFVPIIVSF-SSIFLAVIMFLVWPFVQSGINKVGGGLV----DSTGYIGTLIYGIFLRMLGPFGLHHIFYLPF  
WTTGLGGSVIID-----GKLIEGTQNIFFAELAAQGTDRFFI-----  
-----GTSRFMSGRFITMMFGL-PGAALALYYTAKRE  
ERTKVFGLLMSSALTSFLTGITEPLEFSFLVAPILYV-VHATFDGFAMLAHILQ----ITIGQTFS-GGFVDFILGILQGN--SRT  
NWLLVPVIGIVWFFLYYFTFIFLINKFDFKTPGRTQDLNSEDSPSSKSSEFEE-----NYATKVIIGLGGASNIVEL

DCCATRLRITVRDVLKVSEK-ILKKTGSKGVIKNG-NGVQVVYGPVSVLKNEIEELLEA-----

-----</seq-data>

</sequence>

<sequence seq-type="Protein">

<seq-name>O51143</seq-name>

<seq-info><length>1088</length></seq-info>

<seq-data>-----MLKLALERLSMINFIKII  
NFSSLQKFSKALRVPISILPVSCLLIGIGSVFSNSSS-----IVYVDKIFIQNVLGLMKAIGNAILLN---MPLIFSIGISIGVARMG---  
-QGTAALGGLIGYLTF---NITENYFIEAFSGLVEA-----ETMSSVGRINFFGVQ----TLNTGIAGSLAVGLLVGYLHNK  
FYNMMLPKPFVFFSE---CHFVPIVILPFCVFLAIFFLIWSFFDDLIASLGLFV----FRFEYFGSFLYGFLNRRLLLPLGLHSILSFPF  
EFTSLGGVEIVN-----GDTVRLGNKIFYAQLLDPKGFSS-----  
-----GFAKISSGFYLSIMFGL-PGAALGVYKIVHED  
KNKVAALLFSGALTAFLTGITPLEFLFIFTAPLLYF-VHAAYSGFALLANFFN----VTIGNSFS-TGFLDFFMFGILQGN--SKT  
NWISVLPGLAMFFALYYFTFSWLYRYFDFQIFVTDDPFFEGQEGKLESL-----GIAHLLIQGLGGFDNITKL  
DVCSTRLHVDDVNTLVDNN-LLKEAGVLKIGLVN-GKVQLFYGSNVYIKNAIDTYSKSLFEASVMVAVDNVKKGFKTYIE  
MKEDKKLEKQKSGKTYKLSELEED-----

-----</seq-data>

</sequence>

<sequence seq-type="Protein">

<seq-name>PTOA\_ECOLI</seq-name>

<seq-info><length>1088</length></seq-info>

<seq-data>-----MTAKTAPKVTL  
WEFFQQLGKTFMLPVALLSFCGIMLGIGSSLSHDVITL----IPVLGNPVLQAIFTWMSKIGSFASF---LPVMFCIAIPLGLAR  
EN---KGVAAFAGFIGYAVM---NLAVNFWLTNKGILPTTDA-----AVLKANNIQSILGIQ----SIDTGILGAVIAGIIV  
WMLHERFHNIIRLPDALAFFGG---TRFVPIISSL-VMGLVGLVIPLVWPIFAMGISGLGHMI-----NSAGDFGPMFLGTGERLL  
LPFGLHHILVALIRFTDAGGTQEVG-----GQTVSGALTIFQAQLSCPTTHGFSES--  
-----ATRFLSQGKMPAFLGGL-  
PGAALAMYHCARPENRHKIKGLLISGLIACVVGTTTEPLEFLFVAPVLYV-IHALLTGLGFTVMSVLG-----VTIGNTD--GNI  
IDFVVFGILHG---LSTKWYMPVVAIWFVYVYVIFRFAITRFNLKTPGRDSEVASSIEKAVAGAPGKSG-----  
YNVPAILEALGGADNIVSLDNCITRLRLSVKDMSLVNVQ-ALKDNRAIGVVQLNQHNLQVVIGPQVQSVKDEAGLMHT  
VQA-----

-----</seq-data>

</sequence>

<sequence seq-type="Protein">

<seq-name>P96159</seq-name>

<seq-info><length>1088</length></seq-info>

<seq-data>-----MSKSNKSTIW  
EFFESLGTKTFMLPVALLAFSGILLGVGSSFSSSAIKEA----IPFLDNAPFEYLFMWMTKIGLVAFIY---LPVMFAVAIPLGLAREE  
---KGVAGFAGFVGYAAF---NLAINFFLTVAGVLDSQ-----SERVAYGVKNIIGIE----SIDTGILGAVVVGIVAKLH  
QRFYTFKMPDALAFFGG---ARFVPIISAL-VLGVVGVFIPFVWPYFAAGINGIGHVI-----ESAGDFGPMFLGTGERLLLPIGLH  
HILVALIRFTEAGGTMDVC-----GQTVSGALNIFYSELSCADTTTFTPE-----



-----VTAFLSQGKMPTFLGGL-PGAALA  
MYHCARPENRSKIKALLISGVVACIVGGITEPLEFLFLVAPVLYV-VHAILTGLGFMVMGLLD-----VTIGNTD--GNLIDFLVF  
GVLQG---TATKWYLVPLVAAIWVYVYVFKFAITKFNKTPGREVDTAEVDKELEAAFINES-----GKGAAY  
LAALGGKENITSLDNCITRLRLSVNDMSLVNDA-KLKAHGALGVVKLDQHNLQVVGITQVHLVKNEMQAIMSAS-----  
-----

-----</seq-data>

</sequence>

<sequence seq-type="Protein">

<seq-name>Q9RL52</seq-name>

<seq-info><length>1088</length></seq-info>

<seq-data>-----MQKTKAAL  
WEFLQGLGKTFMLPVALLAFCGIMLGIGSSLSSDAVTDN----VAFLKGEFHLVFTWMANTGLVAFTF---LPVLFAMAIPLG  
LARED---KGVAAFSGFVGFVAM---NLAVNFYLTAKGVDFEDE-----KAIEHYGIADVLGVQ----SIDTGLLGAVAV  
GIVVSLHRRFRTRQMPDALAFFGG---LRFVPIVSAL-VLSVLGLLIPLVWPTFNGWISAVGRGI----GHTGVFGPFFFGMG  
EVLLRPIGLHHILVAMFRFTDVGGSGTVC-----GDHVSGALNLFYAQLDCSAAPG  
SAVTD-----ATHFLSQGKMAA  
YLGGL-PGAALAMYHCARRMRPEIKALLVSGVVACVGGITEPLEFLFLVAPWLYL-VHAVLVGLGFLTAAVLG----VFIG  
NTD--GNVIDWLDFVGLQG---STTKWYLVPIAAVWFAAYYFLFRWAITRFDLKTGPREDPPADDDHDEHDEHDGAHDA  
EHAEQVRAAPEPARELVAGKYDAAAMLDAIGGAGNIRSLDNCITRLRMTVADAEAVDEA-RLKKLGA VGVVKLDGHNV  
QVVGIPQVQSVKDAIATMVPAGRP-----

-----</seq-data>

</sequence>

<sequence seq-type="Protein">

<seq-name>O07656</seq-name>

<seq-info><length>1088</length></seq-info>

<seq-data>-----MKQKKAW  
SFFQSLGKAFMYPIALLSVCMMMLGLGSGLASDDMAKL----IPFLAIIPIKTILDFIVSLGLFAFVN---LPVLFIAIPLGLLKDKE  
D--KAYGAFSGLIGFMAM---HLGTNFYLKQHDLLVVA-----DQMSTHGQTIIILGIQ----SYNTSVLGGIVAGLLVAS  
MYKKIVNLRIPESLGSYSG---PRLVPIITLI-VMSGFGLIIPFIWPPFFNLFM LIGHWI----STSGPVGYFFYAVAERTIPFGLN  
HLVTSVFRFTPIGGS AVIG-----GEEYYGT LNMFMAYVKENAVIPLD-----  
-----LAGKMEQGKLMIQY-GL-AGAALA  
MYRTAHAQNRKAIKALLISGVLTVIIGGVSEPIEFLFLVSPLLFV-FHAFMNGFANMVL PYMG----VKMG--FT-GDLIQFIS  
FGVLRG---TRTGWPIAVCVEVAYFFIYFVFRWTILKFNLM TVGREESPVT LNAHEDTAIADIPTDKSEL-----QA  
AEQMVKALGGKENIKSLDNCVTRLRLTIADMGLLDEA-AIKRAGGI AVVKLDQNTLQVIIGTKVIALRRDMDNYMGIY-----  
-----

-----</seq-data>

</sequence>

<sequence seq-type="Protein">

<seq-name>PTGA\_MYCGE</seq-name>

<seq-info><length>1088</length></seq-info>

<seq-data>-----MQISLVK-----IRNKFKQRN  
RGSFRQWVGKLSNGLMIPIAVLPLAGIFLGIGDAISSNSSGIV-----GVKFFGEFIKQGGNVVFAN---LPILFAVAIAITFS

QD----AGVAGFSAFVFWATM---NAFMSSLIIPVDANNTA-----SGYNILYWKAVPQSAIASTLGLN----SLSTSVFGGIIV  
GALTAYLYNKFYAIRLPDVIGFFSG---TRFVPIICMT-IAIPVALLLLMVWPGVSILLNLIGTGLGILG-GRGYGANSIFGYIERA  
LIPFGVHHAFYAPLWYTSAGGSLQEIANQQVWIRAPG---SDYVTRVIGWEDFNTPGKWWIPAALANGTSGMMNGATTT  
GQDSTSALSKYMSKESTNFLSWKELVDGLTRKGNFDELAKNGLLDGSNKIWIGLNQSGILGKKVLLSDGKDYTITFKTFANT  
TPTFWSHGAHALLPISG-----TPSAIT-NGVTVNGTANSKTYNVSQFTVAVPSLNPAQYSQGKFPFMLIGI-PAAGLAMILAA  
PKGRRKEASSIIGSAAFTSFLTGITTEPFEFTFLFLAPWLFYGIHAVLAAVSWFLMNNLS-----ANVGQTFSGSFIDFILYGALPD  
GRGWLANSYLVPIIGIFLALIYFPTFYFLTIRFNLATPGRGGKLITKKEYLAKAAQKTDQTTNT--NFNQQTQ-----IEAGMLL  
RAYGGSENIAGELGACITKLRVTVKNPELVNET-IIKDLGAAGVMRTTPTFFVAVFGTRAAYVKSAMQDIIQGGKVNWTELQKV  
LDKNDSTVEKPEIKPTP--VLKVQDEIVILSPVNGTLKPLTQVPDDTFKNRLVGDGIAILPSDGHFKAPGDVGVKTELAFTPGH  
AFIFDV-DGVKVMLHIGIDTVKINADKKPGEQLEVFVKTQGEYTKLKSSESVVEVDLKKLKRKYDPIT-PFIVMQESLDNFKL  
VPIRQRGEIKVGQPLFKLIYKDKKS-----</seq-data>

</sequence>

<sequence seq-type="Protein">

<seq-name>PTGA\_MYCPN</seq-name>

<seq-info><length>1088</length></seq-info>

<seq-data>-----MQIKAQDTGQQKKSCLLSNIRNK  
WKNRNRGSFRQWVGKLSNGLMIPIAVLPIAGIFLGVGDAIAGNAGDLT-----GLRYFGLFIKNGGDVVFAN---LPILFAI  
AIAITFSQD----AGVAGFSAFVFWAAM---NGFMSSLILPFDKAGKIITDTSTPIAGFKVLYNKSVPVHAIATTLGLR----TLST  
SVFGGIIVGALTSVLYKKFYAIRLPDVIGFFSG---TRFVPIICFV-VAIPVALILLMIWPAVSIGLNAIGTGLGFLG-GKGYGANSI  
FGYIERSLIPFGVHHAFYAPLWYTSAGGSLQEIVNQQVWIRPDFHLSNDYVARVIGWVDPNNSMYIIPGAL-NGQNGSST  
GNTM-SKDLNGALSAYMSKESTAFLTWKDLVDGLTFKGNFDKMAENGLLDGSNKIWLGLNGSGILGKKLLSDGNVYTITF  
KTFANTTPIAWSKGAQAVLPLNASSTIVNNTALAAATQSNNTNNIKLYPVNSFRVAVESLNPAQYSQGKFPFMLFGI-P  
AAGVAMILAAPKDRRKEAASIVGSAFTSFLTGITTEPFEFTFLFLAPWLFYGVHAVLAAVSWFLMNNILG-----ANVGQTFSG-  
SFIDFILYGALPDGRRWLANSYLVPIIGLFLAAIYFPTFYFLIKHFNLATPGRGGKLITKKEYLASKAAAKAEGVSGVAENFTQT  
Q-----IEAGILLQAYGGKENIVELGACITKLRVTVKNPELVKEE-PIKELGAAGVMRTTPTFFVAVFGTRAAYVKSAMQDII  
QGKVNWEALQKVINTDQLAVEPKETTPPEVMPVQDEIVILSPVNGTLKSLNQPDETFKQKLVGEGVAIVPSDGHFKA  
PGEAGVKTELAFFGGHAYIFDI-DGIKVMLHIGIDTVQINAKKQPGEPLEVFDIKTKQGEYTKESSESVVEVDLKKLSKKNPI  
T-PFVVMKESLENFKLVPIRQRGEIKVGQPIFKLVYKKSQA-----</seq-data>

</sequence>

<sequence seq-type="Protein">

<seq-name>PTIB\_BACSU</seq-name>

<seq-info><length>1088</length></seq-info>

<seq-data>-----MMQKI  
QRFGSAMFVPVLLFAFAGIIVGISTLFKNKTLMGF----LADPDGFWYQCWYIIEQGGWTVFNQ---MPLLFAGIPVALAKK  
A----QARACLEALTYVYLTFF---NYFVSAILTVWGGAFGVDMNQ-----EVGGTSGLTMIAGIK----TLDTNIIAGAISSIVV  
FLHNRVFDKKLPDFLIGIFQG---STYIVMISFF-IMIPIALAVSYIWPVMVQSGIGSLQSFL----VASGAVGVWIYTFLELRIPIPTGL  
HHFIYTPFIYGPAAVE-----GGIVTYWAQHLGEYSQSAPLKL-----  
-----FPQGGFALHGNSKIFGI-PGIALAFYV  
TAKKEKKLVAGLLIPVTLTAIVAGITEPIEFTFLFISPFLFA-VHAVLAATMSTVMYIMAG----VV-GNMG--GGLIEAVTLNWI  
PLFGSHGMTYVYQILIGLSFTAIYFFVFRFLILKFNIATPGREKDEQKETKLYSKKEYRERKKNKDEASAAETAD-----DTAFL  
YIEALGGKDNITEVTNCATRLRVSVKDETKVEPDSVFRALGAHGVVRNG-KAFQVIIGLSVPQMRERVEKILNQ-----  
-----

-----</seq-data>  
</sequence>  
<sequence seq-type="Protein">  
<seq-name>Q9S2H4</seq-name>  
<seq-info><length>1088</length></seq-info>  
<seq-data>-----MSTATDTAAPAKKRG  
SGLFQGLQKVGSRSLQLPIAVLPAAGIMVRLGQDDIFGKDGL-----GWDKVAAVFNNAGGALTGS---LPILFCIGVAIG  
FAKKA---DGSTALAAVVGFLVY---SKVLEAFPVTE-----AVVQDGADVAAT----YNDPGVLGGIIMGLLA  
AVLWQRYHRKKLVDWLGFNG---RRLVPIIMAF-VGIVVGVFFGLVWEPIGDGISNFGGEWM----TGLGSGGAALFGGVN  
RALIPVGMHQFVNTVAWFQLGDFNTSA-----GDVVHGDITRFLAGDP-----  
-----SAGIFQAGFFPIMMFG  
L-PAAALAMAHTARPERRKAVLGMMISLAATSFVTGVTEPIEFSEFMFIAPVLYV-LHAVLTAISMAITWGLG----VHAGFNF  
S-AGFIDYALNWHL-----ATKPWLIPIGLVFAAIYYVTFRFAIVKFNKTPGREPEEEVEDLTKA-----  
-----

---</seq-data>  
</sequence>  
<sequence seq-type="Protein">  
<seq-name>Q9S2H5</seq-name>  
<seq-info><length>1088</length></seq-info>  
<seq-data>-----MSADSAVSPARAR  
WNTAFQGLQKMGRSLQLPIAVLPAAGILNRLGQPDVFGDDGL-----GWTNVSKVMTGAGGALLDGLGLPLLFCV  
GVAIGMAKKA---DGSTALAAVAGFLVY---YNVLRQFPEDCPEGSKVVPQIGCQ-----VTDGSGEVTAFAV----FQNPNG  
VFGGIVMGLLTAYFWQRFHRTLVDWLGFNG---RRLVPIIMAF-VAIVFAALCLWVWPPIGDALESFSDWL----NGIGA  
WGAGVFLANRALLVIGLHQFLNVPMWFQFGSYTKPD-----GTVVHGDINM  
FLAGDP-----DAGQF  
TTGFFPIMMFAL-PAAALAITHCAPHRKEVGGMLMSVGLTSFVTGITEPLEYSFLFIAPLLYA-AHAVLTGVSMAVTWALG  
----VKDGFSS-AGLIDYVINWNL-----ATKPWLIPIGLCFAVYYVFRFAITKFDLKTGREPEEDVEDVTKV-----  
-----

-----</seq-data>  
</sequence>  
<sequence seq-type="Protein">  
<seq-name>q46072</seq-name>  
<seq-info><length>1088</length></seq-info>  
<seq-data>--MASKLTTTSQHILENLGGPDNITSMTHCATRLRFQVKDQSIDVQDQEI DSDPSVLGVVPQGSGTMQVVMG-  
GSVANYYYQEILKLDGMKHFADGEATESSSKKEYGGVR---GKYSWIDYAFEFLSDTRPILWALLGASLIITLLVLADTFGLQDF  
RA-----PMDEQPDTYVFLHSMWRSVYF---LPIMVGATAARKL-----GANEWIGAAIPAALL---TPEFL-----  
-----ALGSAGDTVTVFGLP--MVLNDYSGQVFPPLIAAIGLYWVEKGLKKIPEAVQ-----MVFVPPFFS-LLIMIPATAFLLG  
PFGIGVGNISNLEAIN-NFSPFILSIVIPLLYPFLVPLGLHWPLNAIMIQNINT-----  
-----  
---LGYDFIQGPMGAWNFAC-FGLVTGVFLLSIKERNKAMRQVSLGGMLAGLLGGISEPSLYGVLLRFKKTYP-RLLPGCLAG

GIVMGIF-----DIKAYAFVFTSLLTIPAM-----DPWLGYTIGIAVAFFVSMFLVLALDYRSNEERDEARAKVAADKQAEEDLKAEANATPAAPVAAA-----GAGAGAGAGAAAGAATAVAAPKLAAGEVVDIVSPLEGKAIPLSEVPDPIFAAGKLGPGIAIQPTGNTVVAPAD-ATVI-LVQKSGHAVALRLDSGVEILVHVGLDVTVQLGGEG-----FTVHVERRQQVKAG-DPLITFDADFIKSKDLPLITPVVVSNA--AKFGEIEGIPADQANSSTTVIKVNGKNE-----</seq-data>

</sequence>

<sequence seq-type="Protein">

<seq-name>ptga\_brela</seq-name>

<seq-info><length>1088</length></seq-info>

<seq-data>--MASKLTTTSQHILENLGGPDNITSMTHCATRLRFQVKDQSIVDQQEIDSDPSVLGVVPQGSTGMQVVMG-GSVANYYQEILKLDGMKHFADGEATESSSKKEYGGVR---GKYSGIDYAFEFLSDTFRPILWALLGASLIITLLVLADTFGLQDFRA-----PMDEQPDYVFLHSMWRSVFYF---LPIMVGATAARKL-----GANEWIGAAIPAALL---TPEFL-----ALGSAGDTVTVFGLP--MVLNDYSGQVFPPLIAAIGLYWVEKALKKIIPEAVQ-----MVFVPFFS-LLIMIPATAFLLGPFQIGVGNIGISSLLEAVN-NFSPFILSIVIPLLYPFLVPLGLHWPLNAIMIQNLNT-----

-----LGYDFIQGPMGAWNFAC-FGLVTGVFLIALKEKNRAMRQVSLGGMLAGLLGGISEPSLYGVLLRFKKTYP-RLLPGCLVGGIVMGIF-----DIKAYAFVFTSLLTIPAM-----DPWLGYTIGIAAAFFTSMLLVFFDYRSDAERDEAKAQMAAAEQTN-----TPAAPAAPV-----APAAGAAAAGGAAGATAVATKPRLAAGQLVEITSPLEGHAVPLSEVPDPIFAAGKLGPGIAIEPTGNTVVAPAD-ATVI-LVQKSGHAVALRLESGVELLIHIGLDTVQLGGEG-----FKVHVERKQQVKAG-DPLITFDPEFIRSKNLPLITPVVVSNA--NKFGEIVGIEAAQADATTTVIKVNAGAE-----</seq-data>

</sequence>

<sequence seq-type="Protein">

<seq-name>o68468</seq-name>

<seq-info><length>1088</length></seq-info>

<seq-data>-MSKTEMRTAAEELAGIGGADNIASFTHCATRLRFELNDAFKADKDKLDAIPKVMGAVPQGGGRNYQVVIG-GDVASVYNEMVQLPGVRKSDADVKAASRAKTQ-----GKMPWLDTAFEYLSDFRPILGVLLGASLIIAFTAVMEAFGVVDTRA-----DDKAAIWFFIDAMWRSVFYF---LPVMVAYNAGNKL-----RIDPWVPAAVMLALF---TPEFLGLKENPVANCVVDE-----ALGTETCSIDLGIN--VALPDYGGNVFVPLIMALVAAGIYKGFQKIIPSAVH-----MVFVPFLT-LLFTIPITAVLIGPFGVWLGSTIGVGLAWMN-GNAPVFVAILPMLYPFLVPLGLHWPLNALMLVNIEA-----

-----LGYDFIQGPMGAWNFAC-FGATAAVLAISMREKDPEMRQTSGSALAAGLFGGISEPSLYGIHLRFKRIYP-RMLVGCFAAGLTIAILGTASG-GVTTNAFVFTSLLTIPVF-----SPMLTYTIAVAVAFVAVAFLLIYFTDYRTAEKEASRERAAEA-----GLVPSGTNPETEASTTTETADLVSPVDGMAVKLENIDDKVFASGTLGNGIGIVPVNGNIQSPVA-GTIA-TVTKTGHAFIGIKTDDGVEVLVHIGINTVRMKGEG-----FEPKVAKGDVVSIG-TPLAEVDLDKIKEAGYDNTVVVTVTNT--KAMGEVASIAEGAVKAGEAVVAIKR-----</seq-data>

</sequence>

<sequence seq-type="Protein">

<seq-name>q9x565</seq-name>

<seq-info><length>1088</length></seq-info>

<seq-data>---MDKYHDFNKHIIELVGGKENIEAVVHCMTRLRFTLIDKTKAQTNKLNLDGVIDVVSNNV-AYQIIIGT-HV

NDVYKELMTQLELSPKTTLEEQS-----GKKNPIKAALDVISESMTPILEPIICAGLLAAVLSIASLTGIISP-----DSS  
TYHIFDALRSVAFYF---LPILMAMSCAKRL-----GASPYLAVALAATIL---SSSINDVK-----GLELFGI  
G--LPQITYSNSFIPILLAIWFMGYVTKVVKRVPNTLQ-----YFLTPLL-MLITLPATLLIFGPLGFYMGEGIIIGFFNLLMKYV  
GSWFVMMMLYSALQPFIIMLGAGNFIMPVVASLIAA-----  
-----NGYDPAFISSTISDI  
AVGGAMLGYFLRT---RNLKQKQLFGTVTLSAVL-GVTEPAIYGVFVKYRRPFV-AVMIGGGGLGGLFAGLT-----SVKAYSVA  
W-GLFGLPAYIGE----GDFMNFWFMLAAVVISFAGSAVAAYLLGVP AQEEDQETINHIIAEKGKDKN-----  
-----LRTSSLGNVVEGEVI  
SLNEVKDQAFSTGALGKGIKPIDTHLYSPVD-GEIT-VVFPTNHAIGIQSQDGEILIHIGIDTVELEGK-----YFNLNKQGD  
KIQRG-QLLGTVDFDKIQEAGYDTSTIVVVTNT--DSYLDVIPSND--SEQVIKTDNLLNVIL-----</seq-data>

</sequence>

<sequence seq-type="Protein">

<seq-name>Q9RLU2</seq-name>

<seq-info><length>1088</length></seq-info>

<seq-data>---MGKYQALSFILENVGGKENVLSVTHCMTRLRFTLKDDSKVNEDILKKSSEIMTAQFRGG-RFQVVIGT-HV  
SDVYNEIQGVGTGADKIAEAE-----VKKTGLNRLIEITKVTIPVLGILTASGLLQGILALLTITNVIDV-----NDGG  
YIVLHAMGQAVFYF---LPVVLGYTSAKAF-----NLNPYVGMMLGATLV---IPELMTNLVTDKALYT-----LFDGTMF  
STPVYN-TFFGIPILFPPNGYQYTVIPVIFITFLGAKVEKILKKIVPPLA-----HNLNSFLT-ILITFPLAILIIGPVTNVLSLISAG  
VSGLY-EVSPVITSVVVGLLYQPLVIFGLHWPMISAIGINNLAQ-----  
-----YGVDYIFP  
MSFTASFAQ-TAVVLAVYLKT---RSRNQKALAI PAMISGMF-CIEPAIYGFSLPVKKRFA-FSMIGGAVGSLIISIF-----SVKM  
YAF AF-GVLGFVSFINP----ANSSLGGLYVAIFATIVTMAVSFSLTFFTFKSSSEDVDEETKPLIKQEVLA-----  
-----PIAGTMQPISS  
SADETFASKTMGEGVVIFPTGSKVVAPAA-GVVT-TVFPGGHALGITTENGTEILIHIGIDTVELNGE-----GFDVQVEVGS  
KVKQG-QTLVNVDFAIENKGYKSEVLVILNT--DDFLDIISEEKT TVKQ-GG-KMLTLIPFNGKATNDMEVSY</seq-data>

</sequence>

<sequence seq-type="Protein">

<seq-name>PTBA\_ERWCH</seq-name>

<seq-info><length>1088</length></seq-info>

<seq-data>---MNYETLASEIRDGVGGQENIISVIHCATRLRFKLRDNTNANADALKNNPGIIMVVESSG-QFQVVVGN-Q  
VADVYQALLSLDGMARFSDSAAPEEE-----KKNLSLFSGFIDISSIFTPFVGVMAATGILKGFALGVATHVISE-----  
-SSGTYKLLFAASDALFYF---FPIVLGYTAGKKF-----GGNPFTTLVIGATLV---HPSMIAAFNAMQAP-----  
DHSTLHFLGIP--ITFINYSSSVIPILFASWVSKLEKPLNRWLHANIR-----NFFTPLL-IVISVPLTFLIGPSATWLSQMLA  
GGYQWLY-GLNSLLAGAVMGALWQVCVIFGLHWGFVPLMLNNSV-----  
-----IG  
HDTLLPLL VPAVLGQ-AGATLG VLLRT---QDLKRKGIAGSAFSAIF-GITEPAVYGVTLPLRRPFI-FGCIGGALGAAVMGYA-  
----HTTMYSFGFPSIFSFTQVIPPT----GVDSSVWAAVIGTLLAF AFAALTSWSFGVPKDETPAAADSPAVLAETQANAGA  
-----VRDETL  
FSPLAGEVLLLEQVADRTFASGVMGKGIARPTQGRLYAPVD-GTVA-SLFKTHHAIGLASRGGAEVLIHVGIDTVRLDGR----  
----YFTPHVRVGDVVRQG-DLLEFDGPAIEAAGYDLTTPIVITNS--EDYRGVEPVA--SGKVDANAPLTQLVC-----

</seq-data>

</sequence>

<sequence seq-type="Protein">  
<seq-name>q48408</seq-name>  
<seq-info><length>1088</length></seq-info>  
<seq-data>----MEYKALAQDILTRVGGRENIVSLVHCATRLRFKLDKSKADAEGLKANPGVIMVVESGG-QFQVVIGN-H  
VHDVWLAVRSEAGLTDDSEPVAVKG-----EKVSLIGQLIDIVSGIFTPFIGVLAASGILKGLLALAVVCGWLTT-----  
--QQATYKIWF AASDALFFF---FPLFLGYTAGKKF-----GGNPYITM VIGGALT---HPLMIQAFDASMAP-----  
--GAATEYFLGIP--VTFINYS SSVIPIILASWVSCWIEKR SNAILPSSMK-----NFFT PAIC-LAVVVPLTFLIIGPVATWLSQLL  
ANGYQLIY-QVAPWLAGAAMGALWQVCVIFGLHWGLIPLMINNLAV-----  
-----LG  
HDSMMPMLLPAVMGQ-VGAALGIFLRT---RDARQKVLGSAVSAGIF-GVTEPAIYGLNLP LRRPFI-FGCVYWP IGGAMV  
GFSDS---HVSTYSFGFGNIITLAQMIPPE---GIDATVWGG AAGMFASLIACVLT LVAGLPRSSAEQA AVVVAP-----  
-----ASVNDIL  
APMTG SVLALDQVPDSTFASGLLGQGVAIIP SVGKVIAPFS-GEVA-SIFQTKHAIGLLSDSGIELLIHVGIDTVKLDGA-----  
PFTAHVKEGDKIKAG-DLLEFDRQAILDAGYDLATPIIISNS--DDFRTLDMVS--ASAVDAGQPLLSVSR-----</se  
q-data>  
</sequence>

<sequence seq-type="Protein">  
<seq-name>PTBA\_ECOLI</seq-name>  
<seq-info><length>1088</length></seq-info>  
<seq-data>----MTE--LARKIVAGVGGADNIVSLMH CATRLRFKLDKSKAQA EVLKKT PGIIMVVESGG-QFQVVIGN-HV  
ADVFLAVNSVAGL-DEKAQQAPEND-----DKGNLLNRFVYVISGIF TPLIGLMAATGILKGMLALALTFQWTTE-----  
---QSGTYLILFSASDALFWF---FPIILGYTAGKRF-----GGNPFTAMVIGGALV---HPLILTAFENGQKA-----  
-DALGLDFLGIP--VTLLNYS SSVIPIIFSAWLC SILERRLNAWLPSAIK-----NFFT PLLC-LMVITPVTFLLVGPLSTWISELIAA  
GYLWLY-QAVPAFAGAVMGGFWQIFVMFGLHWGLVPLCINNFTV-----  
-----LGY  
DTMIPLLMPAIMAQ-VGAALGVFLCE---RDAQKKV VAGSAALTS LF-GITEPAVYGVNLP RKYPFV-IACISGALGATIIGYA--  
---QTKVYSFGLPSIFTFMQTIPST---GIDFTVWASVIGGVIAIGCAFVGTVM LHFITAKRQPAQGAPQEKTPEVITP-----  
-----PEQGGICSP  
MTGEIVPLIHVADTTFASGLLGKGIAILPSVGEVRSPVA-GRIA-SLFATLHAIGIESDDGVEILIHVGIDTVKLDGK-----FFSA  
HVNVDKVNVTG-DRLISFDIPAI REAGFDLTPVLISNS--DDFTDVLPHGTAQISA-GE-PLLSIIR-----</seq-data  
>  
</sequence>

<sequence seq-type="Protein">  
<seq-name>q46129</seq-name>  
<seq-info><length>1088</length></seq-info>  
<seq-data>----MKYEQLAKDILKNVGGKENVNSLTHCITRLRFKLDKDEGKANTDILKNMDGVVTVVKSGG-QYQVVIGN-H  
VPDVFAAVNAVGG LQGASEEDE-TE-----EKMNPLNKFIDIVSGVFQPI LGVLCATGMIKGLNAVLVAAGVLAS-----  
----TDSTYIILNAIGDCLFNF---FPIFLGFTA AKKF-----KLNQFTGMAVGAAMV---YPAITSFAG-----  
QTVDFFGIPVVM PSSSYQSTV IPIILAIYIASKVEKLFK KIIPDMVK-----TFLVPFAT-LLVVVPVTFMAIGPISTIAANALGDL  
TLAIY-NFNPTIAGLFIGGF WQVFMFGLHWGLVPIAMNNLAV-----  
-----IGYDPVL  
ATSVAVCFAQ-TGVVMAILAKT---KDKKLSL CIPAIISGFF-GVTEPAIYGITLPRKKPFI-LSCIAAGVTGGIIGFF-----ESKGY S

MGGLGIFALPSYINPE----GIDRGFYGMVIAMVAGIVVGFILMFVTKLNDEEEVKTTESKKEESL-----  
-----VKQEEIVSPIQGEVVTLAEV  
KDEAFSSGALGKGVAINPIEGKVYAPAD-GTLT-TLFPSLHALGITTENGAEILHVGMDTVQLEGK-----HFTAKVKQGDKI  
KKG-QLLIEFDKEAIEKAGYSTITPVLITNS--DQYLDVIETD--KRKVDVNSELLTVVI-----</seq-data>  
</sequence>

<sequence seq-type="Protein">  
<seq-name>ptsa\_pedpe</seq-name>  
<seq-info><length>1088</length></seq-info>  
<seq-data>----MNHQEVADRVLNAIG-KNNIQAAAHCATRLRLVIKDESKIDQQALDDDADVKGTFETNG-QYQIIIGPGD  
VDKVYDALIVKTGLKEVTPDDIKAVAAAG-----QNKNPMLMDFLKVLSDFIPIVPALVAGLLMALNINVLTAEHLFMA---K  
SVVEVYPGLKGAEMINAMASAPFTF---LPILLGFSATKRF-----GGNPYLGATMGMIMV---LPSLVNGYSVATTMAAG--  
-----KMVYWNVFLGH--VAQAGYQGQVLPVLGVAFILATLEKFFHKHIKGAFD-----FTFTPMFA-IVITGFLTF  
TIVGPVLRVSDALTNGLVGLY-NSTGWIGMGIFGLLYSAIVITGLHQTFPAIETQLLAN-----  
-----VAKTGGSFIFPVASMANIGQ-GAATLAIFFAT---KSQKQKALTSSAGVSALL-GITEPAIFGVNLKMKFPFV-FAAIA  
SGIASAFLGLF-----HVLVAMG-PASVIGFISI-----ASKSIPAFMLSAVISFVVAFIPTFIYAKRTLGDDRDQVKSPAPTSTVI  
N-----  
--VNDEIISAPVTGASESLKQVNDQVFSAEIMGKGAIVPSSDQVAPAD-GVIT-VTYDSHHAYGIKTTAGAEILHLGLDTV  
NLNGE-----HFTTNVQKGDVHQQ-DLLGTFDIAALKAANYDPTVMLIVTNT--ANYANVERL-KVTNVQAGE-QLVALTA  
PAASSVAATTV</seq-data>  
</sequence>

<sequence seq-type="Protein">  
<seq-name>Q9S6S6</seq-name>  
<seq-info><length>1088</length></seq-info>  
<seq-data>----MNHKQVAERILNAVG-RDNIQGARHCATRLRLVLKDTGVIDQEALDNDPDLKGTFEAAG-QYQIIVGPGD  
VNTVYEEFIKLTGISEASTADLKEIAGSQ-----KKQNPVMALVKLLSDIFVPLIPALVAGLLMALNNTAEHLFAT---KSL  
VEMFPMWKGAFADIVNTMSAAPFTF---MPILIGYSATKRF-----GGNPYLGAVVGMIMV---MPGLINGYNVAEAINH---  
-----TMTYWDIFGFK--VAQAGYQGQVLPVIGVAFILAKLERFFHKYLND AID-----FTFTPLLS-VIITGFLTFTIV  
GPALRFVSNGLTDGLVGLY-NTLGALGMLVFGGFYSIVVTGLHQSFPAIETMLITN-----  
-----YQHSGIGGDFIFPVAACANMAQ-AGATFAILFVT---KNIKTKALAAPAGVSAIL-GITEPALFGINLKLKYPFF-IALGASAI  
GSLFMGLF-----HVLAVSLG-SAGLIGFISI-----KAGYNLQFMISIFISFLIAFVVTSIYGRRMEAKSITKEKNKQNATTQYQP  
EKVIIDP-----  
---VKSGELLAPINGFVIPLSDVSDPVFSKEIMGKGAIAKPKSGELFSPAD-GEII-IAYETGHAYGIKTKNGGEVLLHIGIDTVSMN  
GN-----GFIQNVKVGQVKVAG-DLLGSFDKEEIKKSGLDLTVIIVITNS--ASYNEILPSENVDIKVGE-KILLLN-----</  
seq-data>  
</sequence>

<sequence seq-type="Protein">  
<seq-name>PTSA\_STRMU</seq-name>  
<seq-info><length>1088</length></seq-info>  
<seq-data>----MDYSKVADEVITAVG-KDNLVAAAHCATRLRLVLKDDSKVDQKALDKNADVKGTFKTDG-QYQVIIGPGD  
VNFVYDEIHKQTGLTEVSTDDLKIAASG-----KKFNPIMALIKLLSDIFVPIIPALVAGLLMALNNFLTSEGLFGT---KSLV

QQFPIIKGSSDMIQLMSAAPFWF---LPILVGISAARKF-----GANQFLGASIGMIMV---APGAANIIGLAANAPIS-----  
--KAATIGAYTGFWNIFGLH--VTQASYTYQVIPVLVAVWLLSILEKFFHKRLPSAVD-----FTFTPLLS-VIITGFLTFIVIGPV  
MKEVSDWLTNGIVWLY-DTTGFLGMGVFGALYSPVVM TGLHQSFPAIETQLISA-----

-----FQNGTGHGDFIFVTASMANVAQ-GAATFAIYFLT---KDKKMKGLSSSSGVSALL-GITEPALFGVNLKYRFPFF-CALIGSA  
SAAAIAAGLL-----QVVAVSLG-SAGFLGFLSI-----KASSIPFYVVELISFAIAFAVTYGYGKTKAVDVF AEA AVEEAIEEVQ  
EIPEEAASAANKAQ-----  
-----VTDEVLAAPLAGEAVELTSVNDPVFSSEAMGKGIKPSGNTVYAPVD-GTVQ-IAFDTGHAYGIKSDNGAEILIHIG  
IDTVSMEGK-----GFEQKVQADQKIKKG-DVLGTFDSDKIAEAGLDNTTMFIVTNT--ADYASVETLASSGTVAVGD-SLLE  
VKK-----</seq-data>

</sequence>

<sequence seq-type="Protein">

<seq-name>ptsb\_staxy</seq-name>

<seq-info><length>1088</length></seq-info>

<seq-data>----MNYKKAENILQALGGEDNVEAMTHCATRLRLVLKDEGLVDEKALGDMDVVKGTFFSTGG-QYQVIIGSG  
TVNKFVSELEKITGKEASSVSEVKTQGT-----KNMNPFQRFVKMLSDIFVPIIPAIVAGLLMGINNILTAPGIFYDN--QS  
LIEVQNQFSGLAEMINIFANAPFTL---LPILIGFSAAKRF-----GGNAYLGAALGMILV---HPELMSAYDYPKALEAG-----  
-----KEIPHWNLFGLE--INQVGYQGQVLPMLVATYILATIEKGLRKYIPTVLD-----NLLTPLLA-ILSTGFITFSFVGPLT  
RTLGYWLS DGLTWLY-EFGGAIGGLIFGLLYAPIVITGMHHSFIAIETQLIAD-----

-----S  
SSTGGSFIFPIATMSNIAQ-GAAALAAFFII--KENKKLKGVASAAGVSALL-GITEPAMFGVNLKLRYPFI-GAIVGSGIGSAYIA  
FF-----KVKAIALG-TAGIPGFISI-----SGQNNGWLHYGIAMIIAFIVAFGVTYALS YRKKYRNIEA-----

-----</seq-data>

</sequence>

<sequence seq-type="Protein">

<seq-name>ptsb\_vibal</seq-name>

<seq-info><length>1088</length></seq-info>

<seq-data>----MNYPAVAKELLTLLGGKSNITALAHCATRLRLAVADEQKIDEQAIDNLEGVKGQFKVAG-QYQIIFGSGIV  
NQVYAEMAKLTGMSEMSTNDVASAGA-----EKQNIQPAVKGLSDIFVPIIPAIVAGLLMGIYNLLTAQGLFIDG--K  
SLIEANPGLTDLANMINTFANAPFVY---LPILLAFSASKF-----GGNPYLGAALGMLMV---HPDLLNGWGF GGASVSG--  
-----NIPVWNILGFE--IQKVG YQGSVLPVLVSAFILAKVELGLRKYVPSVLD-----NLLTPLLA-IFIAGLLTFTVVG  
PFTRDIGFLLGDGLNWLY-NTAGFVGGAVFGLIYAPFVITGMHHSFIAIETQLLAD-----

-----IATTGGTFIFPIAAMSNVSQ-GAAALAVGVMS---KDKKMKGIAIPSGVTGLL-GITEPAMFGVNLKLRYPFI-AAVCAA  
LSSAFITMF-----NVKAQALG-AAGLPGIISI-----TPDKIGYYIAGMVIAFLTAFVLTIVLGIGDRAKVGKAAA-----

-----</seq-data>

</sequence>

<sequence seq-type="Protein">



<seq-name>PTTB\_BACSU</seq-name>  
<seq-info><length>1088</length></seq-info>  
<seq-data>---MGELNKSARQIVEAVGGAENIAAATHCVTRLRFALIDESKVDQEMLDQIDVVKGSFSTNG-QFQVVIGQG  
TVNKVYAELVKETGIGESTKDEVKASE-----KNMNPQRRAVKTLDIFIPILPAIVTAGLLMGINNILTAEGISFST--KSIV  
QVYPQWADLANMINLIAGTAFTF---LPALIGWSAVKRF-----GGNPLLGIVLGVMMLV---HPDLLNAWGYGAAEQSG----  
-----EIPVWNLFGLE--VQKVG YQGQVLPILLASYMLAKIEVFLTKRTPGFIQ-----LLVVAPIT-LLLTGFASFIIGPIT  
FAIGNVLTSLISVF-GSFAALGGLLYGGFYSALVITGMHHTFLAVDLQLIGS-----  
-----  
KLGTFWLWPM LALS NIAQ-GSAALALMFIV---KDEKQKGLSLTSGISAYL-GITEPAIFGVNLR YRFPFI-IAMVSSGLAGMYIS  
SQ-----GVLASSVG-VGGVPGIFSI-----MSQYWGAF AIGMAIVLIVPFAGTYAYGRFKHK-----  
-----  
-----</seq-data>

</sequence>  
<sequence seq-type="Protein">  
<seq-name>PTTB\_ECOLI</seq-name>  
<seq-info><length>1088</length></seq-info>  
<seq-data>-MMSKINQTDIDRLIELVGGRGNIATVSHCITRLRFVLNQPANARPKEIEQLPMVKGCFNAG-QFQVVIG-TN  
VGDYYQALIASTGQAQVDKEQVKKAAAR-----HNMKWHEQLISHFAVIFP L L PALISGGLILGFRNVIGDLPMSNG---Q  
TLAQMYPSLQTIYDFLWLIGEAIFY---LPVGICWSAVKKM-----GGTPILGIVLGVTLV---SPQLMNAYLLGQQLP-----  
-----EVWD-FGMFS-IAKVG YQAQVIPALLAGLALGVIETRLKRIVPDYLY-----LVVVPVCS-LILAVFLAHALIGPF  
GRMIGDGVAFVRHLM TGSFAPIGAALFGFLYAPLVITGVHQTTLAIDLQMIQS-----  
-----  
-----MGGTPVWPLIALS NIAQ-GSAVIGIISS---RKHNEREISVPA AISAWL-GVTEPAMYGINLKYRFPML-CAMIGSGLAG  
LLCGLN-----GVMANGIG-VGGLPGILSI-----QPSYWQVFALAMAIAIIPIVLT SFYIYQRKYRLGTLDIV-----  
-----  
-----</seq-data>

</sequence>  
<sequence seq-type="Protein">  
<seq-name>q9zhj9</seq-name>  
<seq-info><length>1088</length></seq-info>  
<seq-data>---MKEQIVAKEILENIGGKENIKSVEHCATRLRLILNDKEKINEKAIENIDGVKQGFFSAA-QYQIILGTGFVNEV  
YDVIVGQNSDLVTGNNKEEAY-----SQMTLIQKISR TFGDVFVPIIPVLVATGLFMGLRGLLTNLGVQMN-----  
ENFVLTQVLTDTAF AF---LPALVAWSTMKKF-----GGTPVIGIVIGLMLV---SPSLPNAYAVAAGT-----AT  
PINLTILGLN--IPVVG YQGSVLPALVLGIIAAKTQKALKKVPDVL D-----LIVTPFIT-LLFSMVLG LLIVGPIMHNAEQLIFG  
AIKGF M-GLPFG LGGLVVG VGHQLIVVTGVHHALNALEVELLS-----  
-----TGKDAF  
NAMITCGIVAQ-GAAALAVAVKT---KDKKKRSLYISSAIP AFL-GITEPAIFGVNLR FIKPFI-FGCAGGAVGGMLSGIL-----HL  
AGTG MG-ITALPGMLLY-----VNNLGSYILVNVVAIAVAFCLTLFFFKPEE-----  
-----

```
-</seq-data>
</sequence>
<sequence seq-type="Protein">
<seq-name>p94470</seq-name>
<seq-info><length>1088</length></seq-info>
<seq-data>----MNYERVAKQLIPLLGGKENIISAVHCATRLRLVLKDDTKADTKAIENIEGVKGFSSSG-QYQIIFGTGVVNK
VYDSFVQEAGLQHVSADVHQEAVK-----QKMNPLARLAKTLSNIFVPIIPAIVASGLLMGPLGMMKAFKWWAP-----
----DSPLYVLLDMFSSAAFII---LPILIGFSAAKEF-----GGTPFLGAVIGGIMT---HPALLNPWGLAEAK-----
--PNYMHFLGFD--IAMVGYQGTVPILLATYVMCKIERGLRNVVPHTVS-----LLVVPFVT-VISTGFITILAIGPLGNLLGD
GITTVLNFIY-HYGGALAGLIFGGLYSMIVITGVHHSFHAIEANLLAK-----
-----LGVN
YLLPIWSMANVAQ-GGAGLAVFVKA---KSLKTKEVALPSALS AFL-GITEPVIFGVNLKYRKPFI-AAAIGGALGGAYVVFT---
--NVVANAYG-LTGIPMIANRGARRNA--KPHQLFNWICDCGRIGVYCHVIAWISRGRINKAPDNR-----
-----
-----</seq-data>
```

```
</sequence>
<sequence seq-type="Protein">
<seq-name>ptsb_klepn</seq-name>
<seq-info><length>1088</length></seq-info>
<seq-data>----MDFEQISRSLLPLLGGKENIASAAHCATRLRLVLVDDALADQQAIGKIDGVKGCFRNAG-QMQIIFGTGVV
NKVYAAFIQAAGISESSKSEAADLAA-----KKLNPFQRIARLLSNIFVPIIPAIVASGLLMGMLGMVKTYGWVDP-----
--SNALYIMLDMCSSAAFII---LPILIGFTAAREF-----GGNPYLGATLGGILT---HPALTNAWGVAAG-----
FHTMNFFGIE--VAMIGYQGTVPVLLAVWFMSMVEKRLRRVIPDALD-----LILTPFLT-VIISGFIALLLIGPAGRALGDGI
SFILSTLI-SHAGWLAGLLFGGLYSVIVITGIHHSFHAIEAGLLGN-----
-----PSIGVNFL
PIWAMANVAQ-GGACFAVWFKT---KDAKIKAITLPSAFSAML-GITEAAIFGINLRFVKPFI-AALVGGGAAGGAWVVSM---
--HVYMTAVG-LTAIPGMAIV-----QASSLLNYIIGMAIAFAVAFALS TLKYKTD AE-----
-----
```

```
-----</seq-data>
</sequence>
<sequence seq-type="Protein">
<seq-name>ptsb_salty</seq-name>
<seq-info><length>1088</length></seq-info>
<seq-data>----MDFEQISCSLLPLLGGKENIASAAHCATRLRLVLVDDSLADQQAIGKVEGVKGCFRNAG-QMQIIFGTGVV
NKVYAAFTQAAGISESSKSEAADIAA-----KKLNPFQRIARLLSNIFVPIIPAIVASGLLMGMLGMVKTYGWVDP-----
--GNAIYIMLDMCSSAAFII---LPILIGFTAAREF-----GGNPYLGATLGGILT---HPALTNAWGVAAG-----
FHTMNFFGFE--IAMIGYQGTVPVLLAVWFMSIVEKQLRRAIPDALD-----LILTPFLT-VIISGFIALLLIGPAGRALGDGSI
FVLSTLI-SHAGWLAGLLFGGLYSVIVITGIHHSFHAVEAGLLGN-----
-----PSIGVNFL
PIWAMANVAQ-GGACLAVWFKT---KDAKIKAITLPSAFSAML-GITEAAIFGINLRFVKPFI-AALIGGAAGGAWVVSV-----
```

HVYMTAVG-LTAIPGMAIV-----QASSLLNYIIGMVIAFGVAFTVSLVLKYKTDAE-----

-----</seq-data>

</sequence>

<sequence seq-type="Protein">

<seq-name>sacx\_bacsu</seq-name>

<seq-info><length>1088</length></seq-info>

<seq-data>-----MHKEIAKELLLLAGGKNNIISISHCTTRLRFDVKDETKIDIHAIENLQGVQGTFFRYG-LFQIIFGAGVVNKIY  
KEVVHVWETAPSEEPVHQKAS-----RKLNPAAAFAKT LSDIFVPIIPAITASGLLMGLIGMIKVFHWFAA-----GS  
PWIKMLDLVSSTAFIL---LPILVGFSAARQF-----GSNPYLGAVIAGLLT---HPDLLDPSMLGSKT-----PSSL  
DIWGLH--IPMMGYQGSMIPILLSVFMVMSKIEKLLKSIVPKSLD-----VVIIPFIT-VMVTGCLALIVMNPAAASIIGQIMTQSI  
VYIY-DHAGIAAGALFGGIYSTIVLSGLHHSFYAIEATLLAN-----

-----PHVGVNFLVPI

WSMANVAQ-GGAGLAVFLKT---KQSSLKKIALPASLTAFL-GIVEPIVFGVNLKLRPFI-GAAIGGAIGGAYVVAV-----QVV  
ANSYG-LTGIPMISIVLPF----GAANFVHYMIGFLIAAVSAFIATLFLGFKEETE-----

</seq-data>

</sequence>

<sequence seq-type="Protein">

<seq-name>ptsb\_bacsu</seq-name>

<seq-info><length>1088</length></seq-info>

<seq-data>----MDYKETAKRLIELLGGKENIISAAHCATRLRLVMKDESKIDQAQVEELDGVKGAFSSSG-QYQIIFGTGLVN  
KVFDAFSKEADIEREEHVNHQDAAK-----EKLNPAAARFAKTL SNIFVPIIPAIVASGLLMGLLGMINAFHWMSK-----  
---DSALLQLLDMFSSAAFIF---LPILIGVSASKEF-----GSNPYLGAVIGGIMI---HPNLLNPWGLAEEQ-----  
LITCIFS DL---ISLFSATGCNCPACGVCDEQGREMDEKSGSTCGD-----LLVTPFVT-VIVTGFVAFIAIGPLGRALGSGIT  
VALTYVY-DHAGFVAGLIFGGTYSLIVLTGVHHSFHAIEAGLIAD-----

-----IGKNYLL

PIWSMANVAQ-GGAGLAVFFMA---KKAKTKEIALPAAFS AFL-GITEPVIFGVNLRYPFI-AAMIGGALGGAYVVFT-----  
HVAANAYG-LTGIPMIAIAAPF----GFSNLIHYLIGMAIAAVSAFIAAFVMKINDEERKK-----

-----</seq-data>

</sequence>

<sequence seq-type="Protein">

<seq-name>PTBA\_BACSU</seq-name>

<seq-info><length>1088</length></seq-info>

<seq-data>----MDYDKLSKDILQLVGGEENVQRVIHCMTRLRFNLHDNAKADRSQLEQLPGVMGTNISGE-QFQIIGN-D  
VPKVYQAIVRHSNLSDEKSAGSSS-----QKKNVLSAVFDVISGVFTPIIPAIAAGAGMIKGLVALAVTFGWMAE-----  
---KSQVHVILTAVGDGAFYF---LPLLLAMSAARKF-----GSNPYVAAAIAAAIL---HPDLTALLGAGKP-----  
----ISFIGLP--VTAATYSSTVIPILLSIWIASYVEKWIDRFTHASLK-----LIVVPTFT-LLIVVPLTLITVGPLGAILGEYLSSGVN

YLF-DHAGLVAMILLAGTFSLIIMTGMHYAFVPIMINNIAQ-----  
-----NGHDYLLPA  
MFLANMGQ-AGASFAVFLRS---RNKKFKSLALTTSSITALM-GITEPAMYGVNMRLKPPFA-AALIGGAAGGAFYGMT-----  
GVASYIVGGNAGLPSIPVFI-----GPTFIYAMIGLVIAFAAETAAYLLGFEDVPSDGSQQPAVHE-----  
-----GSREIIHSPIKGEV  
KALSEVKDGVFSAGVMGKGFAIEPEEGEVVSPVR-GSVT-TIFKTKHAIGITSDQGAEILIHIGLDTVKLEGQ-----WFTAHIK  
EGDKVAPG-DPLVSFDLEQIKAAGYDVITPVIVTNT--DQYSFS-PVKEIGKVQPKE-ALLALS-----</seq-data>  
</sequence>

<sequence seq-type="Protein">  
<seq-name>p77272</seq-name>  
<seq-info><length>1088</length></seq-info>  
<seq-data>-MAKEISSELLNTILTRVGGPGNIASCGNCMTRLRLGVHDSSLVD-PNIKTLEGVKGVILTSD-QVQVVFPGPKA  
HRAAKAMSELLGEAPVQDAAEIAAQNKRLKA-----KQTSQVQQFLAKFATIFTPLIPGFIAAGLLGIATLIATVMHVPA----  
---DAQGTLPDALNFMKVFVSKGLFTF---LVILVGYNAQAQAF-----GGTGVNGAIIAALFLLGYNPAATTGGYAG-----  
-----FHDFFGLP-----IDPRGNIIGVLIAAWACARIEGMVRRFMPDDL-----MLLTSKIT-LLITATLAYLIIMPLGG  
WLFEGMSWLFMHL--NSNPFCAVLAG-LFLIAVVFVGHQGFIPVYLALMDS-----  
-----  
---QGFNSLPILSMAGAGQ-VGAALALYWRA--QPHSALRSQVRGAIIPGLL-GVGEPLIYGVTLPRMKPFV-TACLGGAAG  
GLFIGLIAWWGLPMGLNSAFG-PSGLVALPLMTSA---QGILPAMAVYAGGILVAWVCGFIFTTLFGCRNVNLD-----  
-----  
-----</seq-data>

</sequence>  
<sequence seq-type="Protein">  
<seq-name>Q45579</seq-name>  
<seq-info><length>1088</length></seq-info>  
<seq-data>MSKENNYHHLAQKILELCGGKSNISYTHCMTRLRITPYDESKADAQALRKLDGVLGVVEAET--LQIILGTGVV  
NHVTAASFSLVSAEEGADVKEAAAKKADINR-----KNATPFKLFRLKIASIFIPLIPALVASGLITGITKAIQAGWLSA-----  
--DSQIAIILTVIGSGLFTY---LGILVGINASKEF-----GGTPALGALAGILII--NPEIAKI-----SLFGE  
E---LLPGRGGLIGVLFAAIFIAYTEQFIRRFIPQSLD-----IIVTPTVS-LLITGIVTYVFMPLGGFISDAIASGLLSIL-DIGGIA  
AGFILGATFLPLVVTGLHQGLTPMHMELINS-----  
-----IGNDPLLILAMGGAGQ-V  
GAAFAVFKT---KKTTLRKAIAAGGLPSGLL-GIGEPLIFGVTLPLGRPVF-NSMFRSWNRRRLSSLF-----SSSHCDW-CLRTA  
AIF-----SSPAFANHPVYRWALYFLRGRFFIDLIRI-----  
-----  
-----</seq-data>

</sequence>  
<sequence seq-type="Protein">  
<seq-name>PTDA\_ECOLI</seq-name>  
<seq-info><length>1088</length></seq-info>  
<seq-data>--MAKNYAALARSVIAALGGVDNISAVTHCMTRLRFVIKDDALIDSPTLKTIPGVGLGVVRSND-QCQVIIGN-TV  
SQAFQEVVSLLPQDMQPAQPVGKPKL-----TLRRIGAGILDALIGTMSPLIPAIIGGSMVKLLAMILEMSGVLTG-----

---GSPTLTILNVIGDGAFFF---LPLMVAHLPRIKF-----KTNMSLAIAIAGVLV---HPSFIELMAKAAQG-----  
--EHVEFALIP--VTAVKYTYTVIPALVMTWCLSYIERWVDSITPAVTK-----NFLKPMLI-VLIAAPLAILLIGPIGIWIGSAISA  
LVYTIH-GYLGWLSVAIMGALWPLLVMGTGMHRVFTPTIIQTIAE-----  
-----TGKEGM  
VMPSEIGANLSL-GGSSLAVAWKT--KNPELRQTALAAAASAIMA-GISEPALYGVAIRLKRPLI-ASLISGFICGAVAGMA-----  
-GLASHSMAAPGLFTSVQFFDP-----ANPMSIVWVFAVMALAVVLSFILLLLGFEDIPVEEAAAQARKYQSVQPTVAKEV  
SLN-----

-----</seq-data>

</sequence>

<sequence seq-type="Protein">

<seq-name>ptcc\_ecoli</seq-name>

<seq-info><length>1088</length></seq-info>

<seq-data>-----MSNVIASLEKVLLPFAVKI  
GKQPHVNAIKNGFIRLMPLTLGAMFVLINNVFLSFGEGSFFYSLGIRLDASTIETLNGLKIGGNVYNGTLGIMSLMAPFFI  
GMALAEERKV---DALAAGLLSVAAFMT---VTPYSVGEAY-----AVGANWLGGANIISGIIIGLVVA  
EMFTFIVRRNWVIKLPDSVPASVSRFSALIPGFIL-SVMGIIAWALNTWGTNFHQIIMDTISTPLAS-L-GSVVG-WAYVIFV  
PLLWFFGIHGALALTALDNGIMTPWALENIATYQQYGSVEAALAAGKTF-----

-----HIWAKPMLDSFIFLG  
G-SGATLGLILAIFIASRRADYRQVAKLALPSGIFQINEPILFGLPIIMNPVMF-IPFVLVQPILAAITLAAYYMGIIPPVTNIA-PW  
TMPTGLGAFF-----NTNGSVAALLVALFNLGIAATLIYLPFVVVANKAQNDAIDKEESEEDIANALKF-----

---</seq-data>

</sequence>

<sequence seq-type="Protein">

<seq-name>PTCC\_BACST</seq-name>

<seq-info><length>1088</length></seq-info>

<seq-data>-----MDRFIRMLEDVMPVAG  
KIAEQRHLQAIIRDGIILSMPLLIIGSLFLIVGFLPIPGYNEWMAKW-----FGEHWLDKLLYPVGATFD-IMALVVSFGVAY  
RLAEKYKV---DALSAGAISLAAFL---ATPYQVPFTPEGAKETIMVSG-----GIPVQWVGSKGLFVAMILAIVS  
TEIYRKIIQKNIVIKLPDGVPPAVARSFVALIPGAAVLVVVVARLILEMTPFESFHNIVSVLLNKPLSV-LGGSVFGAIVAVLLV  
QLLWSTGLHGAAIVGGVMGPIWLSLMDENRMVFQQNPAEL-----

-----PNVITQQFFDLWIYIGG  
-SGATLALALTMMFRARSRLKSLGRLAIAPGIFNINEPITFGMPIVMNPLLI-IPFILVPVLLVVVSYAAMATGLVAKPSGVA  
VPWTTPIVISGYL-----ATGGKISGSILQIVNFFIAFAIYPPFFSIWDKQKAAEEQADPTISSGAGATHSL-----

-----</seq-data>

</sequence>

<sequence seq-type="Protein">

<seq-name>PTLB\_LACLA</seq-name>
