# Supplementary material for: Accurate multiple sequence alignment of transmembrane proteins with PSI-Coffee
Source: Springer Nature journal article supplement (doi:10.1186/1471-2105-13-s4-s1), 2012-03-28
Supplement: 12859_2012_5098_MOESM2_ESM.pdf [file 12859_2012_5098_MOESM2_ESM.pdf]

## The performance of each TMP family by individual database

*default* means T-Coffee without homology extension. Others are PSI-Coffee searching against

corresponding databases. The construction of databases is explained in “Methods” section.

| mode  | default | UniRef50-TM | UniRef90-TM | UniRef100-TM | UniProt-TM | UniRef50 | UniRef90 | UniRef100 | UniProt | NR    |
|-------|---------|-------------|-------------|--------------|------------|----------|----------|-----------|---------|-------|
| SP    |         |             |             |              |            |          |          |           |         |       |
| 7TM   | 0.977   | 0.983       | 0.983       | 0.985        | 0.985      | 0.982    | 0.985    | 0.985     | 0.985   | 0.986 |
| Nat   | 0.740   | 0.787       | 0.782       | 0.787        | 0.789      | 0.807    | 0.797    | 0.780     | 0.790   | 0.779 |
| ACR   | 0.989   | 0.991       | 0.991       | 0.987        | 0.985      | 0.991    | 0.993    | 0.993     | 0.992   | 0.992 |
| DTD   | 0.965   | 0.974       | 0.975       | 0.974        | 0.975      | 0.974    | 0.978    | 0.978     | 0.977   | 0.977 |
| ION   | 0.785   | 0.753       | 0.756       | 0.797        | 0.797      | 0.754    | 0.782    | 0.783     | 0.785   | 0.783 |
| MSL   | 0.965   | 0.986       | 0.971       | 0.978        | 0.978      | 0.986    | 0.971    | 0.971     | 0.978   | 0.971 |
| PHOTO | 0.955   | 0.955       | 0.956       | 0.954        | 0.954      | 0.954    | 0.954    | 0.955     | 0.954   | 0.955 |
| PTGA  | 0.908   | 0.900       | 0.927       | 0.935        | 0.921      | 0.911    | 0.928    | 0.928     | 0.920   | 0.926 |
| AVG   | 0.911   | 0.916       | 0.918       | 0.925        | 0.923      | 0.920    | 0.924    | 0.922     | 0.923   | 0.921 |
| TC    |         |             |             |              |            |          |          |           |         |       |
| 7TM   | 0.520   | 0.650       | 0.550       | 0.610        | 0.580      | 0.540    | 0.590    | 0.610     | 0.610   | 0.620 |
| Nat   | 0.130   | 0.240       | 0.240       | 0.240        | 0.240      | 0.240    | 0.310    | 0.250     | 0.310   | 0.250 |
| ACR   | 0.830   | 0.870       | 0.860       | 0.790        | 0.760      | 0.880    | 0.900    | 0.890     | 0.880   | 0.880 |
| DTD   | 0.470   | 0.610       | 0.640       | 0.610        | 0.600      | 0.620    | 0.640    | 0.630     | 0.610   | 0.620 |
| ION   | 0.210   | 0.210       | 0.240       | 0.240        | 0.240      | 0.210    | 0.210    | 0.210     | 0.240   | 0.210 |
| MSL   | 0.910   | 0.960       | 0.930       | 0.950        | 0.950      | 0.960    | 0.930    | 0.930     | 0.950   | 0.930 |
| PHOTO | 0.530   | 0.520       | 0.520       | 0.520        | 0.520      | 0.510    | 0.510    | 0.510     | 0.500   | 0.520 |
| PTGA  | 0.380   | 0.430       | 0.400       | 0.400        | 0.400      | 0.460    | 0.400    | 0.400     | 0.400   | 0.400 |
| AVG   | 0.498   | 0.561       | 0.548       | 0.545        | 0.536      | 0.553    | 0.561    | 0.554     | 0.563   | 0.554 |
